# Supplementary material for: Comparative safety of antiepileptic drugs for neurological development in children exposed during pregnancy and breast feeding: a systematic review and network meta-analysis
Source: PubMed Central journal article supplement — BMJ Open. 2017 Jul 20;7(7):e017248. doi: 10.1136/bmjopen-2017-017248 (PMC5642793; doi:10.1136/bmjopen-2017-017248), 2017-07-20
Supplement: bmjopen-2017-017248.draft_revisions.pdf [file bmjopen-2017-017248.draft_revisions.pdf]

# BMJ Open

## Comparative neurological outcomes and safety of anti-epileptic drugs during pregnancy and breastfeeding: a systematic review and network meta-analysis

|                                    |                                                                                                                                                                                                                                                                                                                                                                                                                                                                                                                                                                                                                                                                                                                                                                                                                                                                                                                                                                                                                                                                                                                                                                                                                                                                                                                                                                                                                                                                                                                                                                                                                                                                                                                                    |
|------------------------------------|------------------------------------------------------------------------------------------------------------------------------------------------------------------------------------------------------------------------------------------------------------------------------------------------------------------------------------------------------------------------------------------------------------------------------------------------------------------------------------------------------------------------------------------------------------------------------------------------------------------------------------------------------------------------------------------------------------------------------------------------------------------------------------------------------------------------------------------------------------------------------------------------------------------------------------------------------------------------------------------------------------------------------------------------------------------------------------------------------------------------------------------------------------------------------------------------------------------------------------------------------------------------------------------------------------------------------------------------------------------------------------------------------------------------------------------------------------------------------------------------------------------------------------------------------------------------------------------------------------------------------------------------------------------------------------------------------------------------------------|
| Journal:                           | <i>BMJ Open</i>                                                                                                                                                                                                                                                                                                                                                                                                                                                                                                                                                                                                                                                                                                                                                                                                                                                                                                                                                                                                                                                                                                                                                                                                                                                                                                                                                                                                                                                                                                                                                                                                                                                                                                                    |
| Manuscript ID                      | bmjopen-2017-017248                                                                                                                                                                                                                                                                                                                                                                                                                                                                                                                                                                                                                                                                                                                                                                                                                                                                                                                                                                                                                                                                                                                                                                                                                                                                                                                                                                                                                                                                                                                                                                                                                                                                                                                |
| Article Type:                      | Research                                                                                                                                                                                                                                                                                                                                                                                                                                                                                                                                                                                                                                                                                                                                                                                                                                                                                                                                                                                                                                                                                                                                                                                                                                                                                                                                                                                                                                                                                                                                                                                                                                                                                                                           |
| Date Submitted by the Author:      | 10-Apr-2017                                                                                                                                                                                                                                                                                                                                                                                                                                                                                                                                                                                                                                                                                                                                                                                                                                                                                                                                                                                                                                                                                                                                                                                                                                                                                                                                                                                                                                                                                                                                                                                                                                                                                                                        |
| Complete List of Authors:          | Veroniki, Areti Angeliki; Li Ka Shing Knowledge Institute, St. Michael's Hospital<br>Rios, Patricia; Li Ka Shing Knowledge Institute, St. Michael's Hospital<br>Cogo, Elise; Li Ka Shing Knowledge Institute, St. Michael's Hospital<br>Straus, Sharon; Li Ka Shing Knowledge Institute, St. Michael's Hospital;<br>University of Toronto, Department of Medicine<br>Finkelstein, Yaron; The Hospital for Sick Children; University of Toronto,<br>Department of Paediatrics<br>Kealey, M.; Li Ka Shing Knowledge Institute, St. Michael's Hospital<br>Reynen, Emily; Li Ka Shing Knowledge Institute, St. Michael's Hospital<br>Soobiah, Charlene; Li Ka Shing Knowledge Institute, St. Michael's Hospital;<br>University of Toronto, Institute for Health Policy Management & Evaluation<br>Thavorn, Kednapa; University of Ottawa, School of Epidemiology, Public<br>Health and Preventive Medicine, Faculty of Medicine; The Ottawa Hospital<br>Research Institute, Clinical Epidemiology Program<br>Hutton, Brian; University of Ottawa, School of Epidemiology, Public Health<br>and Preventive Medicine, Faculty of Medicine; Ottawa Hospital Research<br>Institute, Center for Practice Changing Research<br>Hemmelgarn, BR; University of Calgary, Departments of Medicine and<br>Community Health Sciences<br>Yazdi, Fatemeh; Li Ka Shing Knowledge Institute, St. Michael's Hospital<br>D'Souza, Jennifer; Li Ka Shing Knowledge Institute, St. Michael's Hospital<br>MacDonald, Heather; Li Ka Shing Knowledge Institute, St. Michael's<br>Hospital<br>Tricco, Andrea; Li Ka Shing Knowledge Institute, St. Michael's Hospital;<br>University of Toronto, Epidemiology Division, Dalla Lana School of Public<br>Health |
| <b>Primary Subject<br>Heading</b>: | Neurology                                                                                                                                                                                                                                                                                                                                                                                                                                                                                                                                                                                                                                                                                                                                                                                                                                                                                                                                                                                                                                                                                                                                                                                                                                                                                                                                                                                                                                                                                                                                                                                                                                                                                                                          |
| Secondary Subject Heading:         | Obstetrics and gynaecology                                                                                                                                                                                                                                                                                                                                                                                                                                                                                                                                                                                                                                                                                                                                                                                                                                                                                                                                                                                                                                                                                                                                                                                                                                                                                                                                                                                                                                                                                                                                                                                                                                                                                                         |
| Keywords:                          | multiple treatment meta-analysis, knowledge synthesis, Epilepsy < NEUROLOGY, pregnancy, infants, developmental delay                                                                                                                                                                                                                                                                                                                                                                                                                                                                                                                                                                                                                                                                                                                                                                                                                                                                                                                                                                                                                                                                                                                                                                                                                                                                                                                                                                                                                                                                                                                                                                                                               |
|                                    |                                                                                                                                                                                                                                                                                                                                                                                                                                                                                                                                                                                                                                                                                                                                                                                                                                                                                                                                                                                                                                                                                                                                                                                                                                                                                                                                                                                                                                                                                                                                                                                                                                                                                                                                    |

1  
2  
3  
4  
5  
6  
7  
8  
9  
10  
11  
12  
13  
14  
15  
16  
17  
18  
19  
20  
21  
22  
23  
24  
25  
26  
27  
28  
29  
30  
31  
32  
33  
34  
35  
36  
37  
38  
39  
40  
41  
42  
43  
44  
45  
46  
47  
48  
49  
50  
51  
52  
53  
54  
55  
56  
57  
58  
59  
60

SCHOLARONE™  
Manuscripts

For peer review only

1  
2  
3  
4 1 **Comparative neurological outcomes and safety of anti-epileptic drugs**  
5  
6 2 **during pregnancy and breastfeeding: a systematic review and network**  
7  
8  
9 3 **meta-analysis**

- 10  
11 4 Areti Angeliki Veroniki, PhD, MSc<sup>1</sup> Email: [VeronikiA@smh.ca](mailto:VeronikiA@smh.ca)  
12  
13 5 Patricia Rios, MSc<sup>1</sup> Email: [RiosP@smh.ca](mailto:RiosP@smh.ca)  
14  
15 6 Elise Cogo, ND, MLIS<sup>1</sup> Email: [CogoE@smh.ca](mailto:CogoE@smh.ca)  
16  
17 7 Sharon E. Straus, MD, MSc<sup>1,2</sup> Email: [Sharon.straus@utoronto.ca](mailto:Sharon.straus@utoronto.ca)  
18  
19 8 Yaron Finkelstein, MD<sup>3,4,5</sup> Email: [Yaron.Finkelstein@sickkids.ca](mailto:Yaron.Finkelstein@sickkids.ca)  
20  
21 9 Ryan Kealey, PhD<sup>1</sup> Email: [ryan.kealey@utoronto.ca](mailto:ryan.kealey@utoronto.ca)  
22  
23 10 Emily Reynen, MD, CM, PharmD<sup>1</sup> Email: [ereynen@gmail.com](mailto:ereynen@gmail.com)  
24  
25 11 Charlene Soobiah, PhD (Cand.)<sup>1,6</sup> Email: [SoobiahC@smh.ca](mailto:SoobiahC@smh.ca)  
26  
27 12 Kednapa Thavorn, PhD<sup>7,8,9</sup> Email: [kthavorn@ohri.ca](mailto:kthavorn@ohri.ca)  
28  
29 13 Brian Hutton, PhD, MSc<sup>7,10</sup> Email: [bhutton@ohri.ca](mailto:bhutton@ohri.ca)  
30  
31 14 Brenda R. Hemmelgarn, MD, PhD<sup>11</sup> Email: [Bhemmelg@ucalgary.ca](mailto:Bhemmelg@ucalgary.ca)  
32  
33 15 Fatemeh Yazdi, MSc<sup>1</sup> Email: [SabaghYazdiF@smh.ca](mailto:SabaghYazdiF@smh.ca)  
34  
35 16 Jennifer D'Souza, HBSc<sup>1</sup> Email: [jennifer.dsouza@mail.utoronto.ca](mailto:jennifer.dsouza@mail.utoronto.ca)  
36  
37 17 Heather MacDonald, MSc<sup>1</sup> Email: [harmacdonald@gmail.com](mailto:harmacdonald@gmail.com)  
38  
39 18 Andrea C. Tricco, PhD, MSc<sup>1,12,\*</sup> Email: [TriccoA@smh.ca](mailto:TriccoA@smh.ca)

40  
41  
42  
43  
44  
45  
46  
47 19 **AUTHOR DETAILS**

- 48  
49  
50  
51 20 <sup>1</sup> Li Ka Shing Knowledge Institute, St. Michael's Hospital, 209 Victoria Street, East Building,  
52  
53 21 Toronto, Ontario, M5B 1W8, Canada  
54  
55  
56  
57  
58  
59  
60

- 1  
2  
3 22 <sup>2</sup> Department of Medicine, University of Toronto, 27 King's College Circle, Toronto, Ontario,  
4  
5  
6 23 M5S 1A1, Canada  
7  
8 24 <sup>3</sup> The Hospital for Sick Children, 555 University Avenue, Toronto, Ontario, M5G 1X8, Canada  
9  
10  
11 25 <sup>4</sup> Department of Paediatrics, University of Toronto, 172 St. George Street, Toronto, Ontario,  
12  
13 26 M5R 0A3, Canada  
14  
15 27 <sup>5</sup> Department of Pharmacology and Toxicology, University of Toronto, Medical Sciences  
16  
17  
18 28 Building, Room 4207, 1 King's College Circle, Toronto, Ontario, M5S 1A8, Canada  
19  
20 29 <sup>6</sup> Institute for Health Policy Management & Evaluation, University of Toronto, 4th Floor,  
21  
22 30 155 College Street, Toronto, Ontario, M5T 3M6, Canada  
23  
24  
25 31 <sup>7</sup> School of Epidemiology, Public Health and Preventive Medicine, Faculty of Medicine,  
26  
27 32 University of Ottawa, Roger-Guindon Building, 451 Smyth Road, Ottawa, Ontario, K1H 8M5,  
28  
29 33 Canada  
30  
31  
32 34 <sup>8</sup> Clinical Epidemiology Program, Ottawa Hospital Research Institute, The Ottawa Hospital,  
33  
34 35 501 Smyth Road, Ottawa, Ontario, K1H 8L6, Canada  
35  
36  
37 36 <sup>9</sup> Institute of Clinical and Evaluative Sciences (ICES uOttawa), 1053 Carling Avenue, Ottawa,  
38  
39 37 Ontario, K1Y 4E9, Canada  
40  
41  
42 38 <sup>10</sup> Ottawa Hospital Research Institute, Center for Practice Changing Research, The Ottawa  
43  
44 39 Hospital-General Campus, 501 Smyth Road, PO Box 201B, Ottawa, Ontario, K1H 8L6,  
45  
46 40 Canada.  
47  
48  
49 41 <sup>11</sup> Departments of Medicine and Community Health Sciences, University of Calgary, TRW  
50  
51 42 Building, 3rd Floor, 3280 Hospital Drive NW, Calgary, Alberta, T2N 4Z6, Canada  
52  
53  
54 43 <sup>12</sup> Epidemiology Division, Dalla Lana School of Public Health, University of Toronto, 6th  
55  
56 44 Floor, 155 College Street, Toronto, Ontario, M5T 3M7, Canada  
57  
58  
59  
60

1  
2  
3 45 **\*Corresponding author**  
4

5  
6 46 Prof. Andrea C. Tricco, PhD  
7

8 47 Scientist, Knowledge Translation Program,  
9

10 48 Li Ka Shing Knowledge Institute, St. Michael's Hospital,  
11

12  
13 49 209 Victoria Street, East Building, Toronto, Ontario, M5B 1W8, Canada  
14

15 50 Phone: 416-864-6060, Fax: 416-864-5805, Email: [TriccoA@smh.ca](mailto:TriccoA@smh.ca)  
16  
17

18 51  
19

20 52 **Keywords:** multiple treatment meta-analysis, knowledge synthesis, epilepsy, pregnancy,  
21

22 53 infants, developmental delay.  
23  
24

25 54 **Word count:** abstract (282 words); main text (3848 words); 1 table; 3 figures; 3 additional  
26

27 55 files; 41 references  
28  
29  
30  
31  
32  
33  
34  
35  
36  
37  
38  
39  
40  
41  
42  
43  
44  
45  
46  
47  
48  
49  
50  
51  
52  
53  
54  
55  
56  
57  
58  
59  
60

1  
2  
3 **56 ABSTRACT**  
4

5  
6 **57 Objectives:** To compare the safety of Anti-epileptic drugs (AEDs) on neurodevelopment of  
7  
8  
9 **58** infants/children exposed *in-utero* or during breastfeeding.

10  
11 **59 Design and Setting:** Systematic review and Bayesian random-effects network meta-  
12  
13  
14 **60** analysis (NMA).

15  
16 **61 Participants:** 27 cohort studies including 4,841 infants/children.

17  
18 **62 Interventions:** Mono- and poly-therapy AEDs were included, including first-generation  
19  
20  
21 **63** (i.e., carbamazepine, clobazam, clonazepam, ethosuximide, phenobarbital, phenytoin,  
22  
23 **64** primidone, valproate) and newer-generation (i.e., gabapentin, lamotrigine, levetiracetam,  
24  
25 **65** oxcarbazepine, topiramate, vigabatrin) AEDs.

26  
27  
28 **66 Primary and secondary Outcome measures:** Cognitive developmental delay and  
29  
30 **67** autism/dyspraxia were primary outcomes. Attention deficit hyperactivity disorder,  
31  
32  
33 **68** language delay, neonatal seizures, psychomotor developmental delay, and social  
34  
35 **69** impairment were secondary outcomes.

36  
37 **70 Results:** The NMA on cognitive developmental delay 10 cohort studies, 748 children, 14  
38  
39  
40 **71** AEDs and control (no AED) suggested valproate (arm sample size (N)=160, odds ratio  
41  
42 **72** (OR)=8.63, 95% credible interval (CrI): 3.01-25.74) and the combination carbamazepine,  
43  
44 **73** phenobarbital, and valproate (N=3, OR=17.31, CrI: 1.02-434.50) were statistically  
45  
46  
47 **74** significantly associated with more children experiencing cognitive developmental delay. A  
48  
49  
50 **75** NMA was conducted on autism including 5 cohort studies, 2,551 children, 11 AEDs and  
51  
52 **76** control; only oxcarbazepine (N=321, OR=13.51, CrI: 1.28-221.40), valproate (N=485,  
53  
54 **77** OR=17.29, 95% CrI: 2.40-217.60), lamotrigine (N=745, OR=8.88, CrI: 1.28-112.00), and  
55  
56 **78** lamotrigine+valproate (N=6, OR=132.70, CrI: 7.41-3851.00) were associated with a

1  
2  
3 79 significantly greater risk of autism compared with control. Psychomotor developmental  
4  
5  
6 80 delay was the largest NMA of secondary outcomes (11 cohort studies, 1,145 children, 17  
7  
8 81 AEDs and control): valproate (N=137, OR=4.16, CrI: 2.04-8.75) and  
9  
10 82 carbamazepine+phenobarbital+valproate (N=3, OR=19.12, CrI: 1.49-337.50) were  
11  
12 83 associated with a significantly greater risk of psychomotor delay compared with control.  
13  
14  
15 84 **Conclusions:** Across all outcomes, valproate alone or combined with another AED is  
16  
17 85 associated with the greatest risk, whereas oxcarbazepine and lamotrigine were associated  
18  
19 86 with increased occurrence of autism. Counselling is advised for women considering  
20  
21 87 pregnancy to tailor the safest regimen.  
22  
23  
24  
25  
26  
27  
28  
29

30 89 **Registration:** PROSPERO database (CRD42014008925).

31 90 **Keywords:** multiple treatment meta-analysis, knowledge synthesis, epilepsy, pregnancy,  
32  
33 91 infants, developmental delay.  
34  
35

## 36 92 **ARTICLE SUMMARY**

### 37 38 39 93 **Strengths and limitations of this study**

- 40  
41  
42  
43 94 • 27 cohort studies involving 4,841 children of women who took AEDs were included  
44  
45 95 in this systematic review. More evidence from long-term follow-up studies is  
46  
47 96 required.  
48  
49  
50 97 • This study was the first that compared and ranked the safety of AEDs, including  
51  
52 98 comparative safety of treatments that have not been directly compared.  
53  
54  
55  
56  
57  
58  
59  
60

1  
2  
3  
4  
5  
6  
7  
8  
9  
10  
11  
12  
13  
14  
15  
16  
17  
18  
19  
20  
21  
22  
23  
24  
25  
26  
27  
28  
29  
30  
31  
32  
33  
34  
35  
36  
37  
38  
39  
40  
41  
42  
43  
44  
45  
46  
47  
48  
49  
50  
51  
52  
53  
54  
55  
56  
57  
58  
59  
60

- 99 • Across all neurological outcomes, valproate alone or combined with another AED is  
100 associated with the greatest risk.
- 101 • Oxcarbazepine and lamotrigine were associated with increased occurrence of  
102 autism.

For peer review only



## 103 INTRODUCTION

104 Anti-epileptic drugs (AEDs) are used by pregnant women for various conditions, such as  
105 epilepsy, pain syndromes, psychiatric disorders, and chronic migraine.<sup>1</sup> AED use during  
106 pregnancy is associated with risks to the fetus, as these drugs can cross the placenta or may  
107 be transferred to the infant through breastfeeding and may be associated with adverse  
108 neurodevelopment outcomes.<sup>2-4</sup> Two systematic reviews examined the association  
109 between AED exposure and neurodevelopment *in utero*, and reported that exposure to  
110 valproate was linked to significantly lower IQ scores and poorer overall  
111 neurodevelopmental outcomes in the children of women who used these medications.<sup>5,6</sup> No  
112 statistically significant associations were found between neurodevelopment and exposure  
113 to other AEDs such as carbamazepine, lamotrigine, or phenytoin.<sup>5-8</sup> However, there is a lack  
114 of sufficiently powered studies to assess the impact of AEDs on neurodevelopment in  
115 children of women exposed to these agents, especially for newer generation drugs, thus  
116 highlighting the need for a systematic review.<sup>9,10</sup>

117 The aim of this study was to compare the safety of AEDs and assess their impact on  
118 neurodevelopment in infants and children exposed *in-utero* or during breastfeeding,  
119 employing a systematic review and network meta-analysis (NMA).

## 120 **METHODS**

121 The methods are briefly described here; details can be found in the published protocol  
122 (Additional File 1).<sup>11</sup> This study was registered with PROSPERO (CRD42014008925). We  
123 followed the ISPOR<sup>12</sup> guidelines for our NMA, and reported our findings using the PRISMA  
124 extension for NMA (Additional File 2).<sup>13</sup>

### 125 **Eligibility criteria**

126 All randomized clinical trials (RCTs), quasi-RCTs, and observational studies were eligible.  
127 Included studies assessed infants or children  $\leq 12$  years of age whose mothers consumed  
128 AEDs during pregnancy and/or while breastfeeding. Both mono- and poly-therapy AEDs  
129 were eligible, including first-generation (i.e., carbamazepine, clobazam, clonazepam,  
130 ethosuximide, phenobarbital, phenytoin, primidone, valproate) and newer-generation (i.e.,  
131 marketed after 1990 including: gabapentin, lamotrigine, levetiracetam, oxcarbazepine,  
132 topiramate, vigabatrin), with no restrictions on AED dosage. Placebo, no AED, other AEDs  
133 alone or in combination, were considered as comparators. Duplicate studies that used the  
134 same registry or population sample (i.e., companion studies) were used for supplementary  
135 information only. No language or other restrictions were imposed.

136 The primary neurological outcomes were cognitive developmental delay and  
137 autism/dyspraxia, and the secondary outcomes included attention deficit hyperactivity  
138 disorder (ADHD), language delay, neonatal seizures, psychomotor developmental delay,  
139 and social impairment (outcome measures and diagnostic scales used are provided in  
140 Additional File 3: Appendix A). Our initial intention was to evaluate all safety outcomes in  
141 infants and children who were exposed to AEDs *in-utero* or during breastfeeding in one  
142 publication. However, given the breadth of evidence we identified, we report results

1  
2  
3 143 related to risk of major congenital malformations, birth, and prenatal outcomes in a second  
4  
5  
6 144 paper (paper in preparation).  
7

### 8 145 **Searching, screening, abstraction, appraisal of methodological quality**

9  
10 146 We searched MEDLINE, EMBASE, and the Cochrane Central Register of Controlled Trials up  
11  
12 147 to December 15, 2015, and identified additional studies from scanning references and  
13  
14 148 contacting authors. Unpublished studies were sought by searching clinical trial registries  
15  
16 149 and conference abstracts. After a calibration exercise, titles/abstracts and full-text papers  
17  
18 150 were screened by two reviewers independently (further details reported in Additional File  
19  
20 151 3: Appendix B). Conflicts were resolved through discussion. The same approach was used  
21  
22 152 for data abstraction and appraisal of methodological quality.  
23  
24  
25  
26

27 153 Observational studies were only identified, and their methodological quality was appraised  
28  
29 154 with the Newcastle-Ottawa Scale (Additional File 3: Appendix C).<sup>14</sup> For each outcome with  
30  
31 155  $\geq 10$  studies and treatment comparisons with different total numbers of patients, the  
32  
33 156 comparison-adjusted funnel plot was used to assess reporting bias,<sup>15</sup> where the overall  
34  
35 157 treatment effect for each comparison was estimated under the fixed-effect meta-analysis  
36  
37 158 model.  
38  
39

### 40 159 **Synthesis of included studies**

41  
42 160 We used the odds ratio (OR) for each dichotomous outcome, and outcome data were  
43  
44 161 pooled using hierarchical models and the Markov Chain Monte Carlo sampling method in a  
45  
46 162 Bayesian framework. To account for anticipated methodological and clinical heterogeneity  
47  
48 163 across studies, and to achieve the highest generalizability in the meta-analytical treatment  
49  
50 164 effects, we applied a random-effects model.<sup>16</sup>  
51  
52  
53  
54  
55  
56  
57  
58  
59  
60

1  
2  
3 165 For connected evidence networks, we applied a random-effects NMA hierarchical model.<sup>17</sup>  
4  
5  
6 166 The review team pre-specified the network nodes. Due to the complexity of the data and  
7  
8 167 the studies' underreporting, differences in drug dosages could not be accounted for, and it  
9  
10 168 was assumed that different dosages of the same AED were equally effective. When a study  
11  
12 169 reported multiple dosages for the same treatment, we combined the data for this  
13  
14 170 treatment. We assessed the transitivity assumption for each outcome a priori using the  
15  
16 171 treatment effect modifiers: age, baseline risk, treatment indication, timing, and  
17  
18 172 methodological quality. The mean of each continuous effect modifier and the mode of each  
19  
20 173 categorical effect modifier for each pairwise comparison were presented in tables for each  
21  
22 174 outcome.<sup>18</sup> The consistency assumption was evaluated for the entire network of each  
23  
24 175 outcome using the design-by-treatment interaction model.<sup>19</sup> If inconsistency was identified,  
25  
26 176 further examination for local inconsistency in parts of the network was completed using  
27  
28 177 the loop-specific method.<sup>20 21</sup> Common within-network between-study variance ( $\tau^2$ ) across  
29  
30 178 treatment comparisons was assumed in the conventional meta-analysis, NMA, and design-  
31  
32 179 by-treatment interaction model, so that treatment comparisons including a single study can  
33  
34 180 borrow strength from the remaining network. This assumption was clinically reasonable,  
35  
36 181 as the treatments included were of the same nature. In the loop-specific approach, common  
37  
38 182 within-loop  $\tau^2$  was assumed.

39  
40 183 For cognitive developmental delay and autism/dyspraxia outcomes, network meta-  
41  
42 184 regression analyses for maternal age and baseline risk (i.e., using the control group) were  
43  
44 185 conducted, when at least 10 studies provided relevant information, assuming a common  
45  
46 186 fixed coefficient across treatment comparisons. Sensitivity analyses for cognitive  
47  
48 187 developmental delay and autism/dyspraxia outcomes were performed for studies with the

1  
2  
3 188 treatment indication of epilepsy, large study size (i.e., >300), maternal alcohol intake,  
4  
5  
6 189 maternal tobacco use, only first-generation AEDs, and higher methodological quality for the  
7  
8 190 two items of the Newcastle-Ottawa Scale that had the highest percentage of low  
9  
10 191 methodological quality (adequacy of follow-up of cohorts and comparability of cohorts  
11  
12 192 items for cohort studies). Severity of epilepsy, which may be a risk factor variable as the  
13  
14 193 more severe the epilepsy the more necessary AED medications for the mother,<sup>22</sup> was not  
15  
16 194 evaluated in our analyses since this was not commonly reported. For autism/dyspraxia, a  
17  
18 195 sensitivity analysis on maternal IQ/psychiatric history was additionally conducted. We  
19  
20 196 measured the goodness of fit using the posterior mean of the residual deviance, the degree  
21  
22 197 of between-study heterogeneity, and the deviance information criterion. In a well-fitting  
23  
24 198 model the posterior mean residual deviance should be close to the number of data points.<sup>23</sup>  
25  
26 199 <sup>24</sup> A difference of 3 units in the deviance information criterion was considered important  
27  
28 200 and the lowest value of the deviance information criterion corresponded to the model with  
29  
30 201 the best fit.<sup>23 24</sup>  
31  
32 202 All analyses were conducted in OpenBUGS<sup>25</sup> assuming non-informative priors for all model  
33  
34 203 parameters and a half normal prior distribution for the between-study standard deviation  
35  
36 204 ( $\tau \sim N(0,1), \tau > 0$ ). The first 10,000 iterations were discarded and then 100,000 simulations  
37  
38 205 were run with thinning of 10 values. Convergence was checked by visual inspection of the  
39  
40 206 evaluation of the mixing of two chains. The median and 95% CrI were calculated for each  
41  
42 207 parameter value, since medians are not overly influenced by outliers. The network  
43  
44 208 command<sup>26</sup> was used to apply the design-by-treatment interaction model.  
45  
46 209 For NMA estimates, a 95% predictive interval (PrI) is also reported to capture the  
47  
48 210 magnitude of the between-study variance ( $\tau^2$ ) and present the interval within which the  
49  
50  
51  
52  
53  
54  
55  
56  
57  
58  
59  
60

1  
2  
3 211 treatment effect of a future study is expected to lie.<sup>27 28</sup> The estimated safety of the included  
4  
5  
6 212 AED medications was ranked using the surface under the cumulative ranking (SUCRA)  
7  
8 213 curve.<sup>29</sup> The larger the SUCRA for a treatment, the higher its safety rank among all the  
9  
10 214 available treatment options. A steep gradient in the cumulative ranking curve suggests that  
11  
12 215 the corresponding treatment is most likely the safest. SUCRA curve values are presented  
13  
14  
15 216 along with 95% CrIs to capture the uncertainty in the parameter values.  
16  
17  
18  
19  
20  
21  
22  
23  
24  
25  
26  
27  
28  
29  
30  
31  
32  
33  
34  
35  
36  
37  
38  
39  
40  
41  
42  
43  
44  
45  
46  
47  
48  
49  
50  
51  
52  
53  
54  
55  
56  
57  
58  
59  
60

## 217 **RESULTS**

### 218 **Literature search and included studies**

219 Our literature search identified 5,305 titles and abstracts, which after the screening process  
220 yielded 642 articles potentially relevant for inclusion (Figure 1). After full-text review, 93  
221 studies fulfilled eligibility criteria along with 17 studies identified through supplemental  
222 methods. Of the 110 total eligible studies in the complete review, 27 articles with nine  
223 companion reports or potentially overlapping studies included one or more relevant  
224 neurological outcomes (Additional File 3: Appendices D, E). Two of the included studies  
225 were conference abstracts with usable data, nine were non-English publications, and four  
226 studies, not captured in the original literature search, were identified through reference  
227 scanning. A table with the key excluded studies and a rationale for their exclusion is  
228 presented in Additional File 3: Appendix F.

### 229 **Study and patient characteristics**

230 We included 27 cohort studies (4,841 total patients) published between 1989 and 2015  
231 (Table 1; Additional File 3: Appendices G, H). The number of patients included in each  
232 study ranged from 23 to 2,011 (median 69), and the number of arms compared in each  
233 study ranged from two to 12. Most studies (78%) were published after 2000, more than  
234 half of the studies (67%) included fewer than 100 patients, and 13 studies (48%) included  
235 a control group of pregnant/breastfeeding women with epilepsy who did not receive AEDs.  
236 The mean age of women ranged from 24 to 32 years. About half of the studies were funded  
237 through government/public research funding (52%).

### 238 **Methodological quality results**

1  
2  
3 239 Twenty-seven observational studies were appraised using the Newcastle Ottawa Scale  
4  
5  
6 240 (Additional File 3: Appendix I). All studies selected the non-exposed cohort from the same  
7  
8 241 community as the exposed cohort, 25 (93%) included a representative (or somewhat  
9  
10 242 representative) sample, 25 (93%) assessed outcomes independently, blindly or via a  
11  
12 243 record linkage (e.g., identified through database records), and 21 (78%) ascertained  
13  
14 244 exposure via secured records (e.g., database records) or structured interviews. No evidence  
15  
16 245 for reporting bias was identified by the visual inspection of the comparison-adjusted funnel  
17  
18 246 plots (Additional File 3: Appendix J).

### 22 247 **Statistical analysis results**

24  
25 248 No important concerns were raised regarding the violation of the transitivity assumption  
26  
27 249 when mean maternal age, mean baseline risk, treatment indication, and timing were  
28  
29 250 assessed (Additional File 3: Appendix K). However, the average methodological quality  
30  
31 251 appraisal across treatment comparisons varied across treatment comparisons. The  
32  
33 252 evaluation of the consistency assumption using the design-by-treatment interaction model  
34  
35 253 suggested that there was no evidence of significant inconsistency across all outcomes  
36  
37 254 (Additional File 3: Appendix K).

38  
39 255 In the following sections, we present the overall results of the NMA analyses for each  
40  
41 256 outcome, while the SUCRA curve values from all outcomes are presented in Additional File  
42  
43 257 3: Appendix L and depicted in a rank-heat plot (<http://rh.ktss.ca/>)<sup>30</sup> in Additional File 3:  
44  
45 258 Appendix M.

### 51 259 **Cognitive developmental delay**

52 260 The NMA for cognitive developmental delay (definitions in Additional File 3: Appendix A)  
53  
54 261 included ten cohort studies, 748 children, and examined 13 AEDs plus control (i.e., no  
55  
56  
57  
58  
59  
60



1  
2  
3 262 exposure to AEDs). One study included children exposed to AEDs both *in-utero* and through  
4  
5 263 breastfeeding, and nine included children exposed to AEDs *in-utero*. Overall, 6% of the  
6  
7  
8 264 treatment comparisons in the network reached statistical significance (Figure 2a;  
9  
10 265 Additional File 3: Appendices K, N). Valproate (OR=8.63, 95% CrI: 3.01-25.74) and  
11  
12 266 carbamazepine+phenobarbital+valproate (OR=17.31, 95% CrI: 1.02-434.50) were  
13  
14 267 statistically significantly associated with greater risk in children experiencing  
15  
16  
17 268 developmental delay compared with control (Figure 3).  
18  
19 269 Restricting the NMA to 9 cohort studies including 725 offspring of women only with  
20  
21 270 epilepsy as their treatment indication, comparing 13 AEDs plus control produced results  
22  
23 271 that were generally in agreement with the overall results. The same was observed in a  
24  
25 272 network meta-regression model of baseline risk for offspring of women with epilepsy who  
26  
27 273 were not exposed to AEDs (estimated regression coefficient on OR scale: 0.94, 95% CrI:  
28  
29 274 0.67-2.19;  $\tau^2=0.17$ , 95% CrI: 0.00-1.38; residual deviance= 40.26, data points= 42, deviance  
30  
31 275 information criterion= 71). Restricting the analysis to 6 cohort studies including 480  
32  
33 276 children comparing 11 first-generation AEDs, we found that valproate was statistically  
34  
35 277 significantly more harmful than control, phenytoin, and carbamazepine, yet  
36  
37 278 carbamazepine+phenobarbital+valproate was no longer statistically significant versus  
38  
39 279 control. The results were no longer statistically significant when restricted to two studies  
40  
41 280 of 319 offspring of women with a history of alcohol and tobacco use comparing 3 AEDs and  
42  
43 281 control. This result was consistent in sensitivity analyses including only higher  
44  
45 282 methodological quality studies in the 'comparability of cohorts' item on the Newcastle-  
46  
47 283 Ottawa Scale (2 studies, 181 children, 3 AEDs plus control) and the 'adequacy of follow-up  
48  
49 284 of cohorts' (4 studies, 283 children, 11 AEDs plus control).  
50  
51  
52  
53  
54  
55  
56  
57  
58  
59  
60

### 285 **Autism/dyspraxia**

286 The NMA on autism/dyspraxia (definitions in Additional File 3: Appendix A) included five  
287 cohort studies, 2,551 children exposed *in utero*, and examined 11 AEDs plus control (i.e., no  
288 AED exposure). Overall, 9% of the treatment comparisons in the network reached  
289 statistical significance (Figure 2b; Additional File 3: Appendices K, N). Compared with  
290 control, only valproate (OR=17.29, 95% CrI: 2.40-217.60), oxcarbazepine (OR= 13.51,  
291 95% CrI: 1.28-221.40), lamotrigine (OR= 8.88, 95% CrI: 1.28-112.00), and  
292 lamotrigine+valproate (OR=132.70, 95% CrI: 7.41-3851.00) were significantly associated  
293 with increased occurrence of autism/dyspraxia (Figure 3).

294 Restricting the NMA to studies including only women with epilepsy as their treatment  
295 indication produced results that were generally in agreement with the overall results,  
296 except that oxcarbazepine was no longer in the network (4 cohort studies, 540 children, 9  
297 AEDs plus control). Two cohort studies of 404 offspring of women with a history of tobacco  
298 use compared 3 AEDs and control and found similar results except that oxcarbazepine and  
299 lamotrigine+valproate were no longer in the network. The results were in agreement in  
300 sensitivity analyses including only higher methodological quality studies in the  
301 'comparability of cohorts' item on the Newcastle-Ottawa Scale (4 studies, 2395 children, 11  
302 AEDs plus control) and the 'adequacy of follow-up of cohorts' (3 studies, 2244 children, 9  
303 AEDs plus control), except that lamotrigine was no longer statistically significant than  
304 control for the latter.

### 305 **Neonatal Seizure**

306 One cohort study included 72 children who were exposed to AEDs *in-utero* as well as  
307 through breastfeeding reported on the incidence of neonatal seizures. The study compared

1  
2  
3 308 valproate against lamotrigine and found no statistically significant difference in neonatal  
4  
5  
6 309 seizures between the two drugs (OR=0.18, 95% CrI: 0.01-3.70).  
7

### 8 310 **Psychomotor developmental delay**

9  
10 311 The NMA on psychomotor developmental delay (definitions in Additional File 3: Appendix  
11  
12 312 A) included 11 cohort studies, 1,145 children exposed *in utero*, and examined 17 AEDs plus  
13  
14  
15 313 control (i.e., no AED exposure). Overall, 4% of treatment comparisons in the network  
16  
17 314 reached statistical significance (Figure 2c; Additional File 3: Appendices K, N). Valproate  
18  
19 315 (OR=4.16, 95% CrI: 2.04-8.75) and carbamazepine+phenobarbital+valproate (OR=19.12,  
20  
21 316 95% CrI: 1.49-337.50) were statistically significantly more harmful than control (Figure 3).  
22  
23  
24

### 25 317 **Language delay**

26  
27 318 The NMA on language delay (definitions in Additional File 3: Appendix A) included five  
28  
29 319 cohort studies, 509 children, and examined four AEDs plus control (i.e., no AED exposure;  
30  
31  
32 320 Figure 2d; Additional File 3: Appendices K, N). One study included children exposed to  
33  
34 321 AEDs *in-utero* and through breastfeeding, and four included children exposed to AEDs *in-*  
35  
36 322 *utero*. Compared with control, valproate was the only treatment significantly associated  
37  
38 323 with increased risk of language delay (OR=7.95, 95% CrI: 1.50-49.13; Figure 3).  
39  
40  
41

### 42 324 **Attention deficit hyperactivity disorder**

43  
44 325 The NMA on ADHD (definitions in Additional File 3: Appendix A) included four cohort  
45  
46 326 studies, 750 children, and examined five AEDs plus control (i.e., no AED exposure). One  
47  
48 327 study included children exposed to AEDs *in-utero* and through breastfeeding, while three  
49  
50 328 studies included children exposed to AEDs *in-utero*. None of the treatment comparisons  
51  
52 329 reached statistical significance (Figure 2e; Additional File 3: Appendices K, N).  
53  
54  
55

### 56 330 **Social Impairment**

1  
2  
3 331 One cohort study included 422 children exposed to AEDs *in-utero* as well as through  
4  
5  
6 332 breastfeeding. The children were exposed to carbamazepine (n=48), lamotrigine (n=71),  
7  
8 333 valproate (n=27) and control (n=278). No significant differences in social impairment were  
9  
10 334 identified.<sup>31</sup>  
11  
12  
13 335

For peer review only

1  
2  
3 336 **DISCUSSION**  
4  
5

6 337 Our results suggest that AEDs generally pose a risk for infants and children exposed *in-*  
7  
8 338 *utero* or during breastfeeding. Valproate was statistically significantly associated with more  
9  
10 339 children experiencing autism/dyspraxia, language, cognitive and psychomotor  
11  
12 340 developmental delays versus children who were not exposed to AEDs. Oxcarbazepine,  
13  
14 341 lamotrigine and lamotrigine+valproate were associated with increased occurrence of  
15  
16 342 autism/dyspraxia, whereas for the cognitive developmental delay and psychomotor  
17  
18 343 developmental delay outcomes, children exposed to the combination of carbamazepine,  
19  
20 344 phenobarbital, and valproate were at a greater risk of harm than those who were not  
21  
22 345 exposed to AEDs. However, due to the lack of data identified in these studies, we were  
23  
24 346 unable to consider a number of factors, such as anticonvulsant dosing, severity of epilepsy,  
25  
26 347 duration of exposure, serum concentrations of exposure, mother's IQ/education, which  
27  
28 348 may all influence outcomes, and hence these results should be interpreted with caution. In  
29  
30 349 addition, our subsequent analyses may be underpowered due to missing data (e.g.,  
31  
32 350 maternal age is not reported in 17 of the 27 studies, alcohol use is not reported in 23 of 27  
33  
34 351 studies, tobacco use is not reported in 22 of 27 studies, and epileptic control group was not  
35  
36 352 included in 14 of 27 studies).  
37  
38 353 NMA is a particularly useful tool for decision-makers because it allows the ranking of  
39  
40 354 treatments for each outcome. However, the results of our SUCRA curves should be  
41  
42 355 interpreted with caution, especially due to the small number of studies and children  
43  
44 356 included in each NMA, which is also reflected in the high uncertainty around the SUCRA  
45  
46 357 values (Additional File 3: Appendix L).<sup>32</sup> The probability that a top AED is actually among  
47  
48  
49  
50  
51  
52  
53  
54  
55  
56  
57  
58  
59  
60

1  
2  
3 358 the worst one is likely high,<sup>32</sup> as the SUCRA findings were unstable with overlapping  
4  
5  
6 359 uncertainty intervals overlap.  
7  
8 360 Our results are consistent with a longitudinal study of 311 children that found exposure to  
9  
10 361 lamotrigine was associated with significantly higher IQ scores and verbal function at six  
11  
12 362 years of age compared to children exposed to valproate (Additional File 3: Appendix F).<sup>8</sup> As  
13  
14 363 indicated in Additional File 3: Appendix F, we were unable to include this study because the  
15  
16 364 outcome was reported as a continuous measure, where we focused on dichotomous  
17  
18 365 outcomes to ease interpretation. Our results are supported by findings from a cohort study  
19  
20 366 in the UK, which found that children exposed to levetiracetam were not at increased risk  
21  
22 367 for delayed development compared to unexposed children (Additional File 3: Appendix  
23  
24 368 F).<sup>33</sup> As indicated in Additional File 3: Appendix F, we were unable to include this study due  
25  
26 369 to the same reason as above. A NMA of 195 RCTs and 28,013 patients (including both males  
27  
28 370 and females) showed that gabapentin and levetiracetam showed the best tolerability  
29  
30 371 profile compared with other AEDs, whereas oxcarbazepine and topiramate had a higher  
31  
32 372 withdrawal rate, and lamotrigine an intermediate withdrawal rate.<sup>34</sup>  
33  
34 373 Across all outcomes, valproate alone or combined with another AED (even with a newer-  
35  
36 374 generation agent, e.g., lamotrigine) was associated with the greatest risk. Similarly, two  
37  
38 375 previous systematic reviews that did not conduct a NMA found valproate was associated  
39  
40 376 with significantly lower IQ scores and poorer overall neurodevelopmental outcomes when  
41  
42 377 compared to an unexposed control group.<sup>5 6</sup> Also consistent with our results, a 2014  
43  
44 378 Cochrane review (with a meta-analysis of 10 studies) concluded that AED polytherapy led  
45  
46 379 to poorer developmental outcomes and IQ compared to healthy controls, epileptic controls,  
47  
48 380 and unspecified monotherapy.<sup>5</sup> This Cochrane review also concluded that insufficient data  
49  
50  
51  
52  
53  
54  
55  
56  
57  
58  
59  
60

1  
2  
3 381 exist for newer anti-epileptic drugs. These risks must be balanced with the need to control  
4  
5  
6 382 seizure activity in pregnancy and thus informed decision making by patients and clinicians  
7  
8 383 is critical.  
9

10 384 Strengths of our study include a comprehensive systematic review methodology that  
11  
12  
13 385 followed the Cochrane Handbook<sup>35</sup> and ISPOR<sup>12</sup> guidelines, and reported using the PRISMA  
14  
15 386 extension for NMA.<sup>13</sup> To the best of our knowledge, our study was the first that compared  
16  
17  
18 387 and ranked the safety of AEDs. We evaluated the comparative safety of treatments that  
19  
20 388 have not been directly compared head-to-head before. In addition, we calculated predictive  
21  
22 389 intervals, which account for between-study variation and provide a predicted range for the  
23  
24  
25 390 treatment effect estimate, should a future study be conducted. On average, the predictive  
26  
27 391 intervals suggested that our results are robust.

28  
29  
30 392 Our systematic review has a few limitations worth noting. First, when multiple doses were  
31  
32 393 reported for the same treatment, we lumped the dosages because this information was not  
33  
34 394 consistently reported across the included studies. However, this is common for cohort  
35  
36 395 studies, which report on a number of different types of exposures amongst patients.

37  
38  
39 396 Second, several polytherapies had high SUCRA estimates but with very wide CrIs, which is  
40  
41 397 due to the small number of studies included for each drug combination with underpowered  
42  
43 398 sample sizes. Evidence suggests that ranking probabilities for a treatment of being the best  
44  
45 399 may be biased toward the treatments with the smallest number of studies, which may have  
46  
47 400 influenced our SUCRA results.<sup>32 36</sup> As such, the effect sizes need to be taken into account  
48  
49 401 when considering the SUCRA values. Third, due to the absence of evidence from RCTs, our  
50  
51 402 conclusions were based on evidence from observational studies only, and inherent biases  
52  
53 403 because of confounding and shortcomings of these studies may have impacted our findings.  
54  
55  
56  
57  
58  
59  
60

1  
2  
3 404 For example, the included studies often failed to report important confounding variables,  
4  
5 405 such as family history of autism, ADHD, and maternal IQ, making it impossible for us to  
6  
7  
8 406 control these variables through subgroup analysis and meta-regression. Recent research  
9  
10  
11 407 papers have explored methods to incorporate non-randomized with randomized evidence  
12  
13 408 in a NMA and have highlighted the need to carefully explore the level of confidence in the  
14  
15 409 non-randomized evidence.<sup>37 38</sup> However, the use of observational studies allows the  
16  
17  
18 410 assessment of the safety profile of AED treatments and offers the opportunity to evaluate  
19  
20 411 effects in pregnancy.<sup>39</sup> Future large-scale observational studies are needed to allow the  
21  
22 412 evaluation of rare adverse events that otherwise cannot be adequately evaluated in RCTs,  
23  
24  
25 413 especially during pregnancy. Fourth, although no intransitivity for most treatment effect  
26  
27 414 modifiers assessed was evident, there was an imbalance in the methodological study  
28  
29  
30 415 quality appraisal across treatment comparisons and most outcomes, which may impact our  
31  
32 416 results. However, the assessment of consistency suggested no disagreement between the  
33  
34  
35 417 different sources of evidence in the network. Fifth, although the tendency towards  
36  
37 418 publication bias is greater with observational studies than with randomized trials,<sup>40</sup> the  
38  
39 419 assessment of publication bias and small-study effects using adjusted funnel plots  
40  
41  
42 420 suggested no evidence for their prevalence. Also, the majority of the included studies in this  
43  
44 421 review compared multiple treatments inducing correlations in each funnel plot, which may  
45  
46 422 mask asymmetry. Although we plotted data points corresponding to the study-specific  
47  
48  
49 423 basic parameters to reduce correlations, this issue may still exist. Sixth, we were unable to  
50  
51 424 conduct sub-group analysis by type of exposure (breastfeeding versus *in utero*) due to the  
52  
53  
54 425 small number of studies included in the NMA and due to the poor reporting; 22 studies did  
55  
56  
57  
58  
59  
60



1  
2  
3 426 not report whether exposure was also in breastfeeding (additional to *in utero*). Hence, we  
4  
5  
6 427 included all studies in the analysis irrespective of the type of exposure.  
7  
8 428 More evidence from long-term follow-up studies is required to further delineate  
9  
10 429 neurodevelopmental risks in children. Registries should aim to include a suitable control  
11  
12 430 group and collect information on potential confounders, such as alcohol and tobacco use,  
13  
14 431 allowing researchers to identify the safest agents for different patient-level covariates, and  
15  
16 432 enhance decision-making for healthcare providers and patients. An individual patient data  
17  
18 433 NMA would likely provide further clarity to the field, which allows the tailoring of  
19  
20 434 management to specific patient characteristics.<sup>41</sup>  
21  
22  
23  
24

## 25 435 **CONCLUSION**

26  
27  
28 436 Across all outcomes, valproate alone or combined with another AED was associated with  
29  
30 437 the greatest risk, whereas oxcarbazepine and lamotrigine were associated with increased  
31  
32 438 occurrence of autism. Counselling is advised for women considering pregnancy to tailor the  
33  
34 439 safest regimen.  
35  
36  
37  
38  
39  
40  
41  
42  
43  
44  
45  
46  
47  
48  
49  
50  
51  
52  
53  
54  
55  
56  
57  
58  
59  
60

1  
2  
3 440 **LIST OF ABBREVIATIONS**

4  
5  
6 441 AEDs: Anti-epileptic drugs; CrI: Credible interval; NMA: Network Meta-analysis; OR: Odds  
7  
8 442 ratio; PrI: Predictive interval; SUCRA curve: Surface under the cumulative ranking curve

9  
10  
11 443 **ADDITIONAL FILES**

12  
13  
14 444 **Additional File 1: Protocol**

15  
16  
17 445 **Additional File 2: PRISMA NMA Checklist**

18  
19  
20  
21 446 **Additional File 3: Supplementary Online Content (Appendices A-O)**

22  
23 447 Appendix A. Outcome measures and diagnostic scales used in analysis

24  
25 448 Appendix B. Additional Information on Methods

26  
27 449 Appendix C. Newcastle-Ottawa Scale scoring guide

28  
29 450 Appendix D. List of included studies

30  
31 451 Appendix E. Additional information on search results

32  
33 452 Appendix F. Key Excluded Studies

34  
35 453 Appendix G. Table of Individual Study Characteristics

36  
37 454 Appendix H. Table of Patient Characteristics

38  
39 455 Appendix I. Methodological quality of observational studies – Newcastle Ottawa Scale

40  
41 456 Appendix J. Comparison-adjusted funnel plots

42  
43 457 Appendix K. Statistically significant network meta-analysis results along with meta-

44  
45 458 analysis results, transitivity, and inconsistency assessments

46  
47 459 Appendix L. Frequencies, events and samples sizes, SUCRA values, and total group risks per

48  
49 460 treatment and outcome

- 1  
2  
3 461 Appendix M. Rank-heat plot of cognitive developmental delay, autism/dyspraxia,  
4  
5  
6 462 psychomotor developmental delay, language delay, and attention deficit hyperactivity  
7  
8 463 disorder outcomes  
9  
10  
11 464 Appendix N. Number of studies and treatments per outcome  
12  
13  
14  
15  
16  
17  
18  
19  
20  
21  
22  
23  
24  
25  
26  
27  
28  
29  
30  
31  
32  
33  
34  
35  
36  
37  
38  
39  
40  
41  
42  
43  
44  
45  
46  
47  
48  
49  
50  
51  
52  
53  
54  
55  
56  
57  
58  
59  
60

For peer review only

1  
2  
3 465 **FIGURE LEGENDS**

4  
5  
6 466 **Figure 1. Study flow diagram**

7  
8  
9 467 **Figure 2. Network diagrams for cognitive developmental delay, autism/dyspraxia,**  
10  
11 468 **psychomotor developmental delay, language delay, and attention deficit**  
12  
13 469 **hyperactivity disorder outcomes**

14  
15  
16 470 *Each treatment node is weighted according to the number of patients that have received the*  
17  
18 471 *particular treatment, and each edge is weighted according to the number of studies*  
19  
20 472 *comparing the treatments it connects.*

21  
22  
23 473 Abbreviations: *carbam - carbamazepine, clobaz - clobazam, clonaz - clonazepam, ethos -*  
24  
25 474 *ethosuximide, gabap - gabapentin, lamot - lamotrigine, levet - levetiracetam, oxcar -*  
26  
27 475 *oxcarbazepine, pheno - phenobarbital, pheny - phenytoin, primid - primidone, topir -*  
28  
29 476 *topiramate, valpro - valproate, vigab - vigabatrin*

30  
31  
32  
33 477 **Figure 3. Forest plots for cognitive developmental delay, autism/dyspraxia,**  
34  
35 478 **psychomotor developmental delay, language delay, and attention deficit**  
36  
37 479 **hyperactivity disorder outcomes**  
38  
39  
40  
41  
42  
43  
44  
45  
46  
47  
48  
49  
50  
51  
52  
53  
54  
55  
56  
57  
58  
59  
60

1  
2  
3 480 **DECLARATIONS**

4  
5  
6 481 **CONTRIBUTORS**

7  
8 482 AAV analysed the data, interpreted the results, and drafted the manuscript. ACT and SES  
9  
10 483 conceived and designed the study, helped obtain funding, interpreted the results, and  
11  
12 484 helped write sections of the manuscript. PR and EC coordinated the review, screened  
13  
14 485 citations and full-text articles, abstracted data, appraised quality, resolved discrepancies,  
15  
16 486 contacted authors, and edited the manuscript. CS provided methodological support and  
17  
18 487 screened citations and full-text articles and edited the manuscript. RK, ER, FY, JDS, KT, and  
19  
20 488 HM screened citations and full-text articles, abstracted data, and/or appraised quality. BH,  
21  
22 489 BRH and YF helped conceive the study and edited the manuscript. All authors read and  
23  
24 490 approved the final manuscript.

25  
26  
27  
28  
29 491 **ACKNOWLEDGEMENTS**

30  
31  
32 492 We thank Dr. David Moher for providing his feedback on our protocol. We thank Dr. Laure  
33  
34 493 Perrier for conducting the literature searches, Becky Skidmore for peer-reviewing the  
35  
36 494 MEDLINE search, and Alissa Epworth for obtaining the full-text articles. We thank Alistair  
37  
38 495 Scott, Wing Hui, and Geetha Sanmugalingham for screening some of the citations and/or  
39  
40 496 abstracting some of the data for a few of the included studies, Misty Pratt and Mona  
41  
42 497 Ghannad for helping scan reference lists, and Ana Guzman, Susan Le, and Inthuja  
43  
44 498 Selvaratnam for contacting authors and formatting the manuscript.

45  
46  
47  
48  
49 499 **FUNDING**

50  
51  
52 500 This systematic review was funded by the Canadian Institutes for Health Research/Drug  
53  
54 501 Safety and Effectiveness Network (CIHR/DSEN). AAV is funded by the Banting Postdoctoral  
55  
56 502 Fellowship Program from the CIHR. SES is funded by a Tier 1 Canada Research Chair in  
57  
58  
59  
60

1  
2  
3 503 Knowledge Translation. BH is funded by a CIHR/DSEN New Investigator Award in  
4  
5  
6 504 Knowledge Synthesis. BRH receives funding from the Alberta Heritage Foundation for  
7  
8 505 Medical Research. ACT is funded by a Tier 2 Canada Research Chair in Knowledge  
9  
10  
11 506 Synthesis. The funder had no role in the design and conduct of the study; collection,  
12  
13 507 management, analysis, and interpretation of the data; preparation, review, or approval of  
14  
15 508 the manuscript; or decision to submit the manuscript for publication.  
16

17  
18 509 **COMPETING INTERESTS**

19  
20 510 None declared.  
21

22 511 **ETHICS APPROVAL**

23  
24 512 Not applicable.  
25  
26

27 513 **PROVENANCE AND PEER REVIEW**

28  
29  
30 514 Not commissioned; externally peer reviewed.  
31

32 515 **DATA SHARING STATEMENT**

33  
34 516 All datasets generated and/or analysed during the current study are available from the  
35  
36 517 corresponding author on reasonable request.  
37  
38

39 518 **OPEN ACCESS**

40  
41 519 This is an Open Access article distributed in accordance with the Creative Commons  
42  
43 520 Attribution Non Commercial (CC BY-NC 4.0) license, which permits others to distribute,  
44  
45 521 remix, adapt, build upon this work non-commercially, and license their derivative works on  
46  
47 522 different terms, provided the original work is properly cited and the use is non-  
48  
49 523 commercial. See: <http://creativecommons.org/licenses/by-nc/4.0/>.  
50  
51  
52  
53  
54  
55  
56  
57  
58  
59  
60

## 524 REFERENCES

- 525 1. Spina E, Perugi G. Antiepileptic drugs: indications other than epilepsy. *Epileptic Disord.*  
526 2004;6(2):57-75.
- 527 2. Harden CL, Pennell PB, Koppel BS, et al. Management issues for women with epilepsy--focus  
528 on pregnancy (an evidence-based review): III. vitamin K, folic acid, blood levels, and breast-feeding:  
529 report of the quality standards subcommittee and therapeutics and technology assessment  
530 subcommittee of the American Academy of Neurology and the American Epilepsy Society. *Epilepsia.*  
531 2009;50(5):1247-55.
- 532 3. Samren EB, van Duijn CM, Koch S, et al. Maternal use of antiepileptic drugs and the risk of  
533 major congenital malformations: a joint European prospective study of human teratogenesis  
534 associated with maternal epilepsy. *Epilepsia.* 1997;38(9):981-90.
- 535 4. Meador K, Reynolds MW, Crean S, Fahrbach K, Probst C. Pregnancy outcomes in women  
536 with epilepsy: a systematic review and meta-analysis of published pregnancy registries and  
537 cohorts. *Epilepsy Res.* 2008;81(1):1-13.
- 538 5. Bromley R, Weston J, Adab N, et al. Treatment for epilepsy in pregnancy:  
539 neurodevelopmental outcomes in the child. *The Cochrane database of systematic reviews.*  
540 2014(10):Cd010236.
- 541 6. Banach R, Boskovic R, Einarson T, Koren G. Long-term developmental outcome of children  
542 of women with epilepsy, unexposed or exposed prenatally to antiepileptic drugs: a meta-analysis of  
543 cohort studies. *Drug Saf.* 2010;33(1):73-9.
- 544 7. Christensen J, Gronborg TK, Sorensen MJ, et al. Prenatal valproate exposure and risk of  
545 autism spectrum disorders and childhood autism. *JAMA.* 2013;309(16):1696-703.
- 546 8. Meador KJ, Baker GA, Browning N, et al. Fetal antiepileptic drug exposure and cognitive  
547 outcomes at age 6 years (NEAD study): a prospective observational study. *Lancet Neurol.*  
548 2013;12(3):244-52.
- 549 9. Wlodarczyk BJ, Palacios AM, George TM, Finnell RH. Antiepileptic drugs and pregnancy  
550 outcomes. *Am J Med Genet A.* 2012;158a(8):2071-90.
- 551 10. Velez-Ruiz NJ, Meador KJ. Neurodevelopmental effects of fetal antiepileptic drug exposure.  
552 *Drug Saf.* 2015;38(3):271-8.
- 553 11. Tricco AC, Cogo E, Veroniki AA, et al. Comparative safety of anti-epileptic drugs among  
554 infants and children exposed in utero or during breastfeeding: protocol for a systematic review and  
555 network meta-analysis. *Syst Rev.* 2014;3:68.
- 556 12. Jansen JP, Trikalinos T, Cappelleri JC, et al. Indirect treatment comparison/network meta-  
557 analysis study questionnaire to assess relevance and credibility to inform health care decision  
558 making: an ISPOR-AMCP-NPC Good Practice Task Force report. *Value Health.* 2014;17(2):157-73.
- 559 13. Hutton B, Salanti G, Caldwell DM, et al. The PRISMA extension statement for reporting of  
560 systematic reviews incorporating network meta-analyses of health care interventions: checklist and  
561 explanations. *Ann Intern Med.* 2015;162(11):777-84.
- 562 14. Wells G, Shea B, O'Connell D, et al. The Newcastle-Ottawa Scale (NOS) for assessing the  
563 quality of nonrandomised studies in meta-analyses Ottawa, Canada: Ottawa Hospital Research  
564 Institute; 2000. Available from: [http://www.ohri.ca/programs/clinical\\_epidemiology/oxford.asp](http://www.ohri.ca/programs/clinical_epidemiology/oxford.asp).
- 565 15. Chaimani A, Higgins JP, Mavridis D, Spyridonos P, Salanti G. Graphical tools for network  
566 meta-analysis in STATA. *PLoS One.* 2013;8(10):e76654.
- 567 16. Furukawa TA, Guyatt GH, Griffith LE. Can we individualize the 'number needed to treat'? An  
568 empirical study of summary effect measures in meta-analyses. *Int J Epidemiol.* 2002;31(1):72-6.

- 1  
2  
3 569 17. Lu G, Ades AE. Combination of direct and indirect evidence in mixed treatment  
4 570 comparisons. *Stat Med*. 2004;23(20):3105-24.  
5 571 18. Jansen JP, Naci H. Is network meta-analysis as valid as standard pairwise meta-analysis? It  
6 572 all depends on the distribution of effect modifiers. *BMC Med*. 2013;11:159.  
7 573 19. White IR, Barrett JK, Jackson D, Higgins JP. Consistency and inconsistency in network meta-  
8 574 analysis: model estimation using multivariate meta-regression. *Res Synth Methods*. 2012;3(2):111-  
9 575 25.  
10 576 20. Song F, Altman DG, Glenny AM, Deeks JJ. Validity of indirect comparison for estimating  
11 577 efficacy of competing interventions: empirical evidence from published meta-analyses. *BMJ*.  
12 578 2003;326(7387):472.  
13 579 21. Veroniki AA, Vasiliadis HS, Higgins JP, Salanti G. Evaluation of inconsistency in networks of  
14 580 interventions. *Int J Epidemiol*. 2013;42(1):332-45.  
15 581 22. Dalessio DJ. Seizure Disorders and Pregnancy. *N Engl J Med*. 1985;312(9):559-63.  
16 582 23. Welton NJ, Sutton AJ, Cooper N, Abrams KR, Ades A. Evidence synthesis for decision making  
17 583 in healthcare. New York: Wiley; 2012.  
18 584 24. Spiegelhalter DJ, Best NG, Carlin BP, Van Der Linde A. Bayesian measures of model  
19 585 complexity and fit. *J R Stat Soc Ser B Stat Methodol*. 2002;64(4):583-639.  
20 586 25. Lunn D, Spiegelhalter D, Thomas A, Best N. The BUGS project: Evolution, critique and future  
21 587 directions. *Stat Med*. 2009;28(25):3049-67.  
22 588 26. Palmer T, Sterne J. Meta-Analysis in Stata: An Updated Collection from the Stata Journal.  
23 589 White I, editor. Texas: Stata Press; 2016.  
24 590 27. Riley RD, Higgins JP, Deeks JJ. Interpretation of random effects meta-analyses. *BMJ*.  
25 591 2011;342:d549.  
26 592 28. Higgins JP, Thompson SG, Spiegelhalter DJ. A re-evaluation of random-effects meta-analysis.  
27 593 *J R Stat Soc Ser A Stat Soc*. 2009;172(1):137-59.  
28 594 29. Salanti G, Ades AE, Ioannidis JP. Graphical methods and numerical summaries for  
29 595 presenting results from multiple-treatment meta-analysis: an overview and tutorial. *J Clin*  
30 596 *Epidemiol*. 2011;64(2):163-71.  
31 597 30. Veroniki AA, Straus SE, Fyraridis A, Tricco AC. The rank-heat plot is a novel way to present  
32 598 the results from a network meta-analysis including multiple outcomes. *J Clin Epidemiol*. 2016.  
33 599 31. Veiby G, Engelsen BA, Gilhus NE. Early child development and exposure to antiepileptic  
34 600 drugs prenatally and through breastfeeding: a prospective cohort study on children of women with  
35 601 epilepsy. *JAMA neurology*. 2013;70(11):1367-74.  
36 602 32. Trinquart L, Attiche N, Bafeta A, Porcher R, Ravaud P. Uncertainty in Treatment Rankings:  
37 603 Reanalysis of Network Meta-analyses of Randomized Trials. *Ann Intern Med*. 2016;164(10):666-73.  
38 604 33. Shallcross R, Bromley RL, Irwin B, Bonnett LJ, Morrow J, Baker GA. Child development  
39 605 following in utero exposure: levetiracetam vs sodium valproate. *Neurology*. 2011;76(4):383-9.  
40 606 34. Zaccara G, Giovannelli F, Giorgi FS, Franco V, Gasparini S, Benedetto U. Tolerability of new  
41 607 antiepileptic drugs: a network meta-analysis. *Eur J Clin Pharmacol*. 2017.  
42 608 35. Higgins JPT, Green S, editors. Cochrane Handbook for Systematic Reviews of Interventions.  
43 609 5.1.0 ed: The Cochrane Collaboration; 2009.  
44 610 36. Kibret T, Richer D, Beyene J. Bias in identification of the best treatment in a Bayesian  
45 611 network meta-analysis for binary outcome: a simulation study. *Clin Epidemiol*. 2014;6:451-60.  
46 612 37. Efthimiou O, Mavridis D, Debray TP, et al. Combining randomized and non-randomized  
47 613 evidence in network meta-analysis. *Stat Med*. 2017.  
48 614 38. Schmitz S, Adams R, Walsh C. Incorporating data from various trial designs into a mixed  
49 615 treatment comparison model. *Stat Med*. 2013;32(17):2935-49.  
50 616 39. Cameron C, Fireman B, Hutton B, et al. Network meta-analysis incorporating randomized  
51 617 controlled trials and non-randomized comparative cohort studies for assessing the safety and  
52 618 effectiveness of medical treatments: challenges and opportunities. *Syst Rev*. 2015;4:147.



- 1  
2  
3 619 40. Easterbrook PJ, Berlin JA, Gopalan R, Matthews DR. Publication bias in clinical research.  
4 620 *Lancet*. 1991;337(8746):867-72.  
5 621 41. Veroniki AA, Straus SE, Soobiah C, Elliott MJ, Tricco AC. A scoping review of indirect  
6 622 comparison methods and applications using individual patient data. *BMC Med Res Methodol*.  
7 623 2016;16(1):47.  
8  
9 624  
10  
11  
12  
13  
14  
15  
16  
17  
18  
19  
20  
21  
22  
23  
24  
25  
26  
27  
28  
29  
30  
31  
32  
33  
34  
35  
36  
37  
38  
39  
40  
41  
42  
43  
44  
45  
46  
47  
48  
49  
50  
51  
52  
53  
54  
55  
56  
57  
58  
59  
60

For peer review only

625 **Table 1. Summary characteristics of included studies**

| <b>Table 1. Summary Characteristics of included studies</b> |                                |                     |
|-------------------------------------------------------------|--------------------------------|---------------------|
| <b>Study/Patient Characteristic</b>                         | <b># of Studies<br/>(n=27)</b> | <b>% of Studies</b> |
| <i>Year of publication</i>                                  |                                |                     |
| 1980-1989                                                   | 1                              | 3.70                |
| 1990-1999                                                   | 6                              | 22.22               |
| 2000-2009                                                   | 5                              | 18.52               |
| 2010-2015                                                   | 14                             | 51.85               |
| NR                                                          | 1                              | 3.70                |
| <i>Continent (of country of study conduct)</i>              |                                |                     |
| Europe                                                      | 18                             | 66.67               |
| North America                                               | 5                              | 18.52               |
| Asia                                                        | 1                              | 3.70                |
| Australia                                                   | 2                              | 7.41                |
| Trans-Continental                                           | 1                              | 3.70                |
| <i>Study design</i>                                         |                                |                     |
| Observational cohort                                        | 27                             | 100.00              |
| Case-control                                                | 0                              | 0.00                |
| Randomized clinical trial                                   | 0                              | 0.00                |
| <i>Registry study</i>                                       |                                |                     |
| Yes                                                         | 10                             | 37.04               |
| No                                                          | 17                             | 62.96               |
| <i>Sample size</i>                                          |                                |                     |
| 0-99                                                        | 17                             | 62.96               |
| 100-299                                                     | 8                              | 29.63               |
| 300-499                                                     | 1                              | 3.70                |
| 500-699                                                     | 0                              | 0.00                |
| 700-999                                                     | 0                              | 0.00                |
| 1000+                                                       | 1                              | 3.70                |
| <i>Number of interventions</i>                              |                                |                     |
| 2                                                           | 4                              | 14.81               |
| 3                                                           | 5                              | 18.52               |
| 4                                                           | 8                              | 29.63               |
| 5-7                                                         | 7                              | 25.93               |
| 8-10                                                        | 2                              | 7.41                |
| 11+                                                         | 1                              | 3.70                |
| <i>Outcomes*,†</i>                                          |                                |                     |
| Cognitive Developmental Delay                               | 11                             | 40.74               |
| Autism/Dyspraxia                                            | 5                              | 18.52               |
| Language Delay                                              | 5                              | 18.52               |

**Table 1. Summary Characteristics of included studies**

| Study/Patient Characteristic                 | # of Studies<br>(n=27) | % of Studies |
|----------------------------------------------|------------------------|--------------|
| ADHD                                         | 4                      | 14.81        |
| Psychomotor Developmental Delay              | 11                     | 40.74        |
| Neonatal Seizures                            | 2                      | 7.41         |
| Social Impairment                            | 1                      | 3.70         |
| <i>Funding</i>                               |                        |              |
| Public                                       | 14                     | 51.85        |
| Private                                      | 0                      | 0.00         |
| Mixed public and private                     | 4                      | 14.81        |
| NR/Unclear                                   | 9                      | 33.33        |
| <i>Treatment indication</i>                  |                        |              |
| Epilepsy                                     | 21                     | 77.78        |
| Mixed indications <sup>‡</sup>               | 0                      | 0.00         |
| Not reported                                 | 6                      | 22.22        |
| <i>Epileptic control group<sup>§</sup></i>   |                        |              |
| Yes                                          | 13                     | 48.15        |
| No/NR/NA                                     | 14                     | 51.85        |
| <i>Mean maternal age</i>                     |                        |              |
| 24-26 y                                      | 2                      | 7.41         |
| 27-29 y                                      | 5                      | 18.52        |
| 30-32 y                                      | 3                      | 11.11        |
| Not reported                                 | 17                     | 62.96        |
| <i>AED exposure during pregnancy</i>         |                        |              |
| Reported as during 1 <sup>st</sup> trimester | 6                      | 22.22        |
| Reported as any time during pregnancy        | 6                      | 22.22        |
| Not reported                                 | 15                     | 55.56        |
| <i>Alcohol use during pregnancy</i>          |                        |              |
| Yes                                          | 4                      | 14.81        |
| NR                                           | 23                     | 85.19        |
| <i>Tobacco use during pregnancy</i>          |                        |              |
| Yes                                          | 5                      | 18.52        |
| NR                                           | 22                     | 81.48        |

**Abbreviations:** ADHD - Attention Deficit Hyperactivity Disorder; AED - anti-epileptic drug(s); NA - Not applicable; NR - Not reported

\* Values in this category do not match totals as some studies report more than one outcome

<sup>†</sup> Percentage of total number of included studies (n=27)

<sup>‡</sup> Includes individuals taking AEDs for psychiatric disorders, migraine, and neuropathic/neurological pain

<sup>§</sup> Consisted of women with Epilepsy who did not take AEDs during pregnancy

626

1  
2  
3  
4  
5  
6  
7  
8  
9  
10  
11  
12  
13  
14  
15  
16  
17  
18  
19  
20  
21  
22  
23  
24  
25  
26  
27  
28  
29  
30  
31  
32  
33  
34  
35  
36  
37  
38  
39  
40  
41  
42  
43  
44  
45  
46  
47  
48  
49  
50  
51  
52  
53  
54  
55  
56  
57  
58  
59  
60

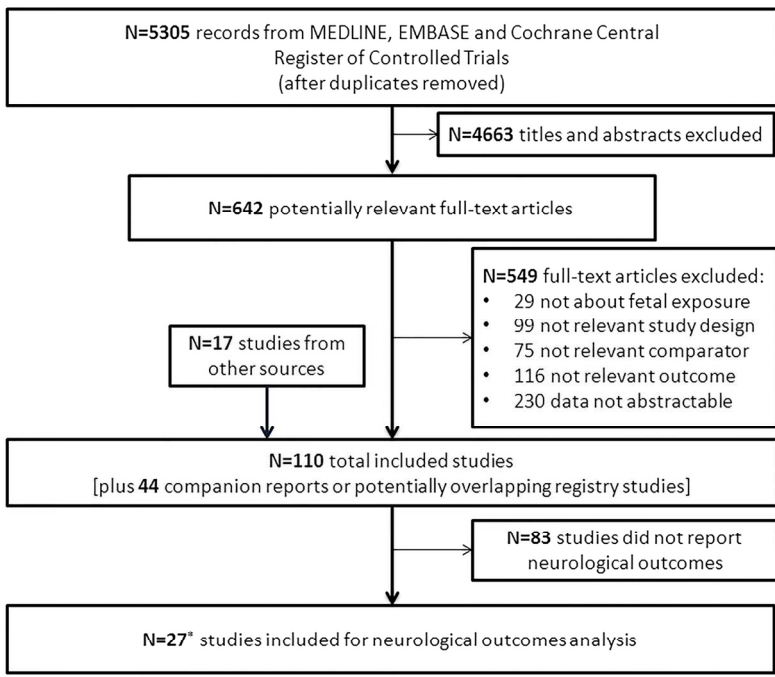

\*27 publications reporting 28 included studies.

Figure 1. Study flow diagram

171x128mm (300 x 300 DPI)

ew only

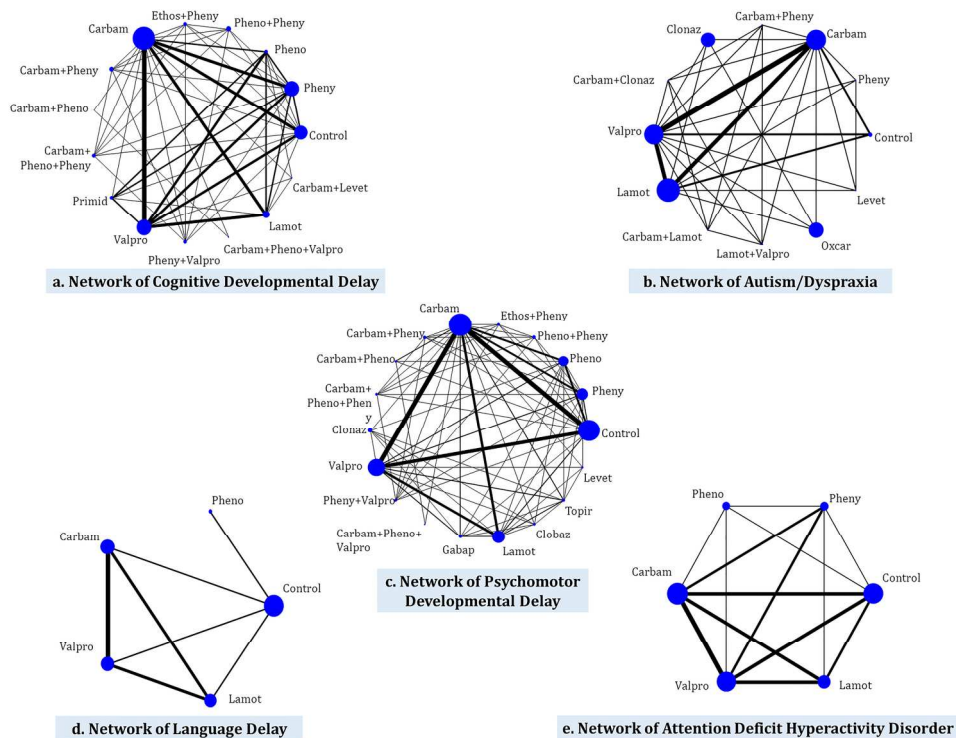

Figure 2. Network diagrams for cognitive developmental delay, autism/dyspraxia, psychomotor developmental delay, language delay, and attention deficit hyperactivity disorder outcomes.

!! + !! + Each treatment node is weighted according to the number of patients that have received the particular treatment, and each edge is weighted according to the number of studies comparing the treatments it connects.!! + !! +

Abbreviations: carbam - carbamazepine, clobaz - clobazam, clonaz - clonazepam, ethos - ethosuximide, gabap - gabapentin, lamot - lamotrigine, levet - levetiracetam, oscar - oxcarbazepine, pheno - phenobarbital, pheny - phenytoin, primid - primidone, topir - topiramate, valpro - valproate, vigab - vigabatrin!! +

171x128mm (300 x 300 DPI)

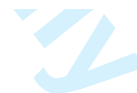

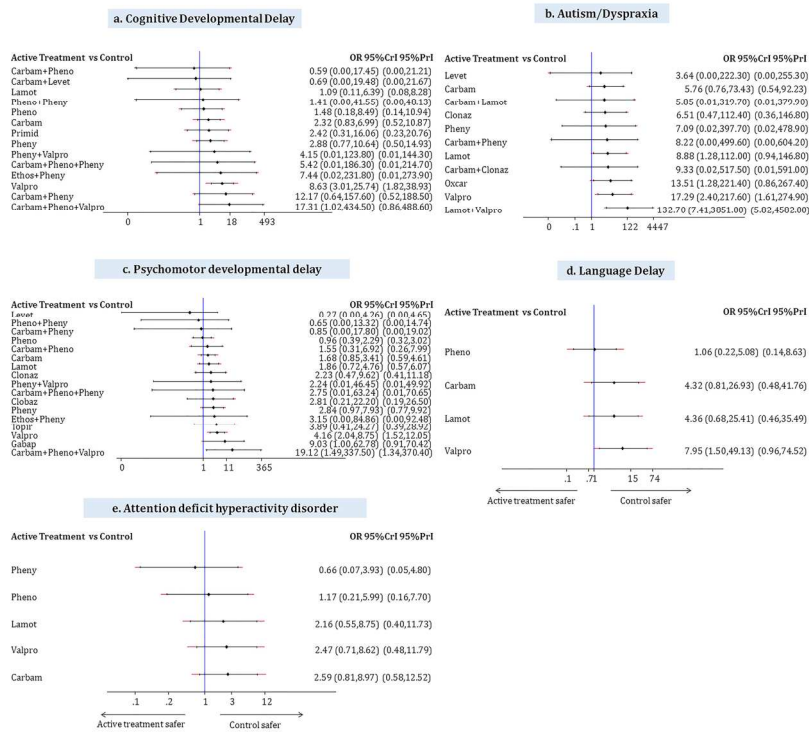

Figure 3. Forest plots for cognitive developmental delay, autism/dyspraxia, psychomotor developmental delay, language delay, and attention deficit hyperactivity disorder outcomes

171x128mm (300 x 300 DPI)

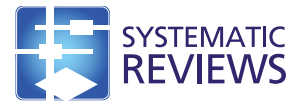

## PROTOCOL

## Open Access

# Comparative safety of anti-epileptic drugs among infants and children exposed *in utero* or during breastfeeding: protocol for a systematic review and network meta-analysis

Andrea C Tricco<sup>1</sup>, Elise Cogo<sup>1</sup>, Veroniki A Angeliki<sup>1</sup>, Charlene Soobiah<sup>1,2</sup>, Brian Hutton<sup>3</sup>, Brenda R Hemmelgarn<sup>4</sup>, David Moher<sup>3</sup>, Yaron Finkelstein<sup>5,6,7</sup> and Sharon E Straus<sup>1,8\*</sup>

## Abstract

**Background:** Epilepsy affects about 1% of the general population. Anti-epileptic drugs (AEDs) prevent or terminate seizures in individuals with epilepsy. Pregnant women with epilepsy may continue taking AEDs. Many of these agents cross the placenta and increase the risk of major congenital malformations, early cognitive and developmental delays, and infant mortality. We aim to evaluate the comparative safety of AEDs approved for chronic use in Canada when administered to pregnant and breastfeeding women and the effects on their infants and children through a systematic review and network meta-analysis.

**Methods:** Studies examining the effects of AEDs administered to pregnant and breastfeeding women regardless of indication (e.g., epilepsy, migraine, pain, psychiatric disorders) on their infants and children will be included. We will include randomized clinical trials (RCTs), quasi-RCTs, non-RCTs, controlled before-after, interrupted time series, cohort, registry, and case-control studies. The main literature search will be executed in MEDLINE, EMBASE, and the Cochrane Central Register of Controlled Trials. We will seek unpublished literature through searches of trial protocol registries and conference abstracts. The literature search results screening, data abstraction, and risk of bias appraisal will be performed by two individuals, independently. Conflicts will be resolved through discussion. The risk of bias of experimental and quasi-experimental studies will be appraised using the Cochrane Effective Practice and Organization of Care Risk-of-Bias tool, methodological quality of observational studies will be appraised using the Newcastle-Ottawa Scale, and quality of reporting of safety outcomes will be conducted using the McMaster Quality Assessment Scale of Harms (McHarm) tool. If feasible and appropriate, we will conduct random effects meta-analysis. Network meta-analysis will be considered for outcomes that fulfill network meta-analysis assumptions.

The primary outcome is major congenital malformations (overall and by specific types), while secondary outcomes include fetal loss/miscarriage, minor congenital malformations (overall and by specific types), cognitive development, psychomotor development, small for gestational age, preterm delivery, and neonatal seizures.

(Continued on next page)

\* Correspondence: [sharon.straus@utoronto.ca](mailto:sharon.straus@utoronto.ca)

<sup>1</sup>Li Ka Shing Knowledge Institute, St. Michael's Hospital, 209 Victoria Street, East Building, Toronto, Ontario M5B 1 T8, Canada

<sup>8</sup>Department of Geriatric Medicine, University of Toronto, 172 St. George Street, Toronto, Ontario M5R 0A3, Canada

Full list of author information is available at the end of the article

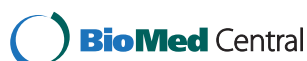

© 2014 Tricco et al.; licensee BioMed Central Ltd. This is an Open Access article distributed under the terms of the Creative Commons Attribution License (<http://creativecommons.org/licenses/by/4.0/>), which permits unrestricted use, distribution, and reproduction in any medium, provided the original work is properly credited. The Creative Commons Public Domain Dedication waiver (<http://creativecommons.org/publicdomain/zero/1.0/>) applies to the data made available in this article, unless otherwise stated.

(Continued from previous page)

**Discussion:** Our systematic review will address safety concerns regarding the use of AEDs during pregnancy and breastfeeding. Our results will be useful to healthcare providers, policy-makers, and women of childbearing age who are taking anti-epileptic medications.

**Systematic review registration:** PROSPERO CRD42014008925.

**Keywords:** Anti-epileptic drug, Breastfeeding, Comparative safety, Congenital malformation, Epilepsy, Fetus, Infant, Network meta-analysis, Pregnancy, Systematic review

## Background

Epilepsy is the most common chronic neurological condition, affecting 0.6 to 1% of the population [1,2]. Individuals with uncontrolled epilepsy experience recurrent seizures, which can have psychosocial and physical consequences, including a compromised life expectancy [3,4]. The goal of anti-epileptic treatment is to improve quality of life and health outcomes by reducing the frequency of seizures [4].

Anti-epileptic medications decrease seizures by reducing excitation and enhancing inhibition of neurons [5-7]. Many of these medications target different channels, including calcium, sodium, and glutamate, and are broadly classified as first generation agents (e.g., phenobarbitone, phenytoin, carbamazepine, sodium valproate, ethosuximide) and second generation agents (e.g., lamotrigine, levetiracetam, topiramate, gabapentin, vigabatrin, oxcarbazepine, clobazam, clonazepam, zonisamide, lacosamide, rufinamide, primidone) [8]. Due to the broad and varied mechanisms of action, the indications for some of these medications also include pain syndromes, psychiatric disorders, and migraine headaches [8].

Many clinical practice guidelines recommend that women of childbearing age continue to take their anti-epileptic medications; however, medications with lower risk of teratogenic events are advised [9,10] since anti-epileptic drugs (AEDs) cross the placenta or transfer through breast milk, posing risks to the fetus and infant [9,11,12].

Some AEDs have been associated with increased risk of harm to the fetus and infants. For example, exposure to valproate has led to increased risk of major congenital malformations [10], cognitive delay, and minor congenital abnormalities [13-16]. Phenobarbital has been associated with minor congenital abnormalities and developmental delay [17,18]. Carbamazepine and lamotrigine have been associated with minor congenital abnormalities [19-22]. However, other than studies of the use of valproate, many studies have produced inconsistent findings regarding harm to the fetus and infant with use of other agents [23]. As such, our objective is to evaluate the comparative safety of AEDs for infants and children who were exposed *in utero* or during breastfeeding through a systematic review and network meta-analysis.

## Methods/Design

### Protocol

A systematic review protocol was developed and registered with the PROSPERO database (CRD42014008925, available at: [http://www.crd.york.ac.uk/PROSPERO/display\\_record.asp?ID=CRD42014008925](http://www.crd.york.ac.uk/PROSPERO/display_record.asp?ID=CRD42014008925)). It was revised with feedback from the decision-makers who posed the query within Health Canada, healthcare practitioners, content experts, and research methodologists. The reporting of our systematic review protocol was guided by the Preferred Reporting Items for Systematic Reviews and Meta-analyses Protocols [24].

### Eligibility criteria

We will include studies examining the effects of AEDs on infants and children who were exposed *in utero* or during breastfeeding. We will include experimental studies (randomized clinical trials [RCTs], quasi-RCTs, non-RCTs), quasi-experimental studies (controlled before and after studies, interrupted time series), and observational studies (cohort, case-control, registry studies) of pregnant women at any stage of pregnancy and breastfeeding women and their infants/children. The rationale for including other study designs in addition to RCTs is that there are ethical issues in conducting RCTs of AEDs in pregnancy, so RCT evidence might not exist for some or all of these drugs. Given that our review includes rare outcomes, including observational evidence is crucial. In contrast to efficacy evaluation, safety assessment usually requires very large sample sizes to be able to detect adverse events. Therefore, while RCTs have lower risk of bias, they usually do not have the statistical power needed to adequately evaluate uncommon/rare safety outcomes due to Type II (i.e., false negative) error [25]. Given that our review includes rare outcomes, including observational evidence is crucial [26]. Additionally, observational studies can often provide more generalizable evidence due to the strict participant inclusion criteria in most RCTs [27]. Real-world safety evidence that has external validity is important for the assessment of the possible risks of AEDs in pregnant and breastfeeding women.

The diagnosis of neurodevelopmental delay related to *in utero* exposure is made before adolescence, and



1  
2  
3  
4  
5 hence, we will limit inclusion to children up to 12 years  
6 of age. AEDs that are approved for chronic use in Canada  
7 will be included. Drugs that are only used acutely or those  
8 that are not currently approved for use in Canada will be  
9 excluded, as the focus of this review is on the Canadian  
10 setting [28-32]. However, most of the medications we  
11 will examine are available in other countries as well.  
12 The relevant 16 medications and their synonyms are  
13 listed in Additional file 1, and the excluded drugs are  
14 listed in Additional file 2. Studies of all combinations  
15 and doses of these medications are eligible for inclusion.  
16 Since we are only interested in exposures that occur *in*  
17 *utero* or during breastfeeding, studies examining AEDs  
18 administered directly to infants or children will be  
19 excluded. All indications for AEDs will be included such  
20 as epilepsy, migraine, pain, and psychiatric disorders.

21 In order to be included, studies must compare an anti-  
22 epileptic medication against another included anti-epileptic  
23 medication, placebo, a 'no intervention' control group, or  
24 combinations of two or more anti-epileptic medications.  
25 Only studies providing results for our outcomes of interest  
26 will be included. Our primary outcome is major congenital  
27 malformations (overall and by specific type, such as  
28 craniofacial defects and neural tube defects). Secondary  
29 outcomes include minor congenital malformations (over-  
30 all and by specific type, such as epicanthal folds and  
31 microstomia), cognition (e.g., global cognitive functioning  
32 and specific cognitive domains such as attention), psycho-  
33 motor development (e.g., autism, dyspraxia), small for ges-  
34 tational age, preterm delivery, neonatal seizures, and fetal  
35 loss/miscarriage. No other limitations will be imposed on  
36 the eligibility criteria, including published/unpublished  
37 material, language of dissemination, duration of follow-up,  
38 or year of publication. The draft eligibility criteria can be  
39 found in Additional file 3.

#### 41 Information sources and literature search

42 Our main literature search will be executed in the MED-  
43 LINE database. The search terms were drafted by an experi-  
44 enced librarian and can be found in Additional file 4. The  
45 search was peer reviewed by another librarian using the  
46 Peer Review of Electronic Search Strategies checklist [33].

47 In addition to MEDLINE, we will also search the  
48 EMBASE and the Cochrane Central Register of Con-  
49 trolled Trials databases. We will follow the MEDLINE  
50 search strategy for these databases, and the search  
51 terms will be adjusted accordingly. The electronic  
52 database search will be supplemented by searching for  
53 unpublished literature [34]. This will be accomplished  
54 through exploring conference abstracts, clinical trial  
55 registries, and contacting manufacturers of AEDs. We  
56 will also scan the reference lists of included studies  
57 and previous reviews in the area [23,35,36].

#### Study selection process

The eligibility criteria screening form will be pilot-tested  
by the team and is presented in Additional file 3. We  
will calculate inter-rater reliability from the pilot-test  
and screening will only commence after high agreement  
(e.g., kappa statistic  $\geq 60\%$ ) is observed [37]. Subsequently,  
two reviewers will screen each title/abstract and poten-  
tially relevant full-text articles from the literature search  
results, independently. Conflicts will be resolved through  
discussion. All screening will occur using our online  
screening software (synthesi.SR) [38].

#### Data items and data collection process

We will abstract data on the PICOS elements [39], in-  
cluding patient characteristics (e.g., age of the mother  
and infant/child, indication for anti-epileptic treatment,  
co-morbidities, concomitant medications), intervention  
details (e.g., type of anti-epileptic treatment, dose, route  
of administration, duration of treatment, timing [trimes-  
ter] of treatment during pregnancy), comparator details  
(e.g., comparator agent, dose, route of administration),  
outcome results (e.g., major congenital abnormality, minor  
congenital abnormality, cognitive function, psychomotor  
development) at the longest duration of follow-up, and  
study characteristics (e.g., study design, country of con-  
duct, year of conduct, sample size, setting). These charac-  
teristics will be abstracted using a data abstraction form  
created in Excel with an accompanying "cheat sheet" that  
will guide the reviewers with this process. The data ab-  
straction form and cheat sheet will be pilot-tested and  
data abstraction will only commence when high agree-  
ment (e.g., kappa statistic  $\geq 60\%$ ) [37] is observed. Each  
included study will be abstracted by two team members,  
independently, who will resolve disagreements through  
discussion.

#### Methodological quality/risk of bias appraisal

We will use various tools to assess the methodological  
quality/risk of bias of each of the studies that fulfill our  
eligibility criteria. This will be conducted by two reviewers,  
independently, and conflicts will be resolved through dis-  
cussion. First, we will appraise the risk of bias of experi-  
mental and quasi-experimental studies using the Cochrane  
Effective Practice and Organization of Care Risk-of-Bias  
tool [40]. Second, we will assess the methodological quality  
of observational studies using the Newcastle-Ottawa Scale  
[41]. Third, the quality of reporting of harms will be  
appraised using the McMaster Quality Assessment Scale  
of Harms (McHarm) tool [42].

#### Synthesis of included studies

A narrative summary of study results will be presented  
along with evidence summary tables. When sufficient  
data are available, we will conduct random effects meta-

1  
2  
3  
4  
5  
6  
7  
8  
9  
10  
11  
12  
13  
14  
15  
16  
17  
18  
19  
20  
21  
22  
23  
24  
25  
26  
27  
28  
29  
30  
31  
32  
33  
34  
35  
36  
37  
38  
39  
analysis to calculate pooled odds ratios for dichotomous data and pooled mean differences for continuous data [43,44]. Direct (pairwise) meta-analysis will be performed with RCTs alone in order to examine whether the data are consistent between direct and indirect evidence. If the large majority of included studies are observational, we will also conduct additional meta-analyses including observational studies alone. Analyses will be stratified by treatment indication (e.g., epilepsy, pain, etc.) to reduce clinical heterogeneity between different study populations whenever possible; for example, epilepsy itself in pregnant women is related to an increased baseline risk of certain neonatal adverse outcomes. Statistical, clinical, and methodological heterogeneity will be examined prior to conducting the meta-analysis. Funnel plots will be drawn for outcomes including at least 10 studies to explore asymmetry that might be explained by clinical, statistical, and methodological heterogeneity. The proportion of statistical heterogeneity will be examined using the  $I^2$  measure [45] and the magnitude of statistical heterogeneity will be calculated using the restricted maximum likelihood [46]. Meta-regression will be conducted for clinically relevant subgroups or when extensive statistical heterogeneity is observed (e.g.,  $I^2 \geq 75\%$ ) [47]. This will allow the examination of the impact of important factors on our results, such as maternal age, dose, duration and timing (e.g., trimester) of anti-epileptic treatment, co-morbidities, concomitant medications, risk of bias results, and sample size (due to Type II statistical power errors with rare adverse events). To ensure the meta-regression analysis is intuitive, the number of covariates examined will be less than 10% of the number of studies included in the meta-analysis for the particular outcome.

40  
41  
42  
43  
44  
45  
46  
47  
48  
49  
50  
51  
52  
53  
We anticipate that many of these outcomes will be rare. To deal with studies reporting zero events in one treatment arm, 0.5 will be added to the numerator and 1 will be added to the denominator. We will exclude studies reporting zero events in all treatment arms for a particular outcome [48,49]. We also anticipate that we will encounter missing data in the included studies. We will contact the study authors for this data and if we are unable to receive the data, we will impute missing data (e.g., measures of variance) using established methods [50]. To ensure that our imputations do not bias our results, we will conduct a sensitivity analysis [51]. The meta-analysis and meta-regression will be analyzed in R using the *metafor* command [52].

54  
55  
56  
57  
58  
59  
60  
A random-effects network meta-analysis will be conducted to make inferences regarding the comparative safety of the various AEDs [15], as well as rank their safety using rankograms and the surface under the cumulative ranking curve [53]. We will ensure the following factors are present prior to conducting network meta-analysis:

i) transitivity (i.e., comparable distribution of effect modifiers across comparisons), which will be examined using boxplots or percentages to visually inspect potential effect modifiers of treatment effect [54]; ii) consistency between direct and indirect data, which will be examined locally (i.e., in certain paths of the network) using the loop-specific method [55,56] and the node-splitting method [57], and globally (i.e., evaluating the network as a whole), using the design-by-treatment interaction model [58]; and iii) we will quantify the amount of variability attributed to heterogeneity and inconsistency rather than sampling error, by calculating the  $I^2$  [59]. We will estimate the amount of heterogeneity using the restricted maximum likelihood method and assuming common within-network heterogeneity. We will compare the magnitude of heterogeneity between consistency and inconsistency models, as well as between meta-regression and network meta-analysis models to determine how much heterogeneity will be explained by inconsistency or the explanatory variable, respectively. We will first use the design-by-treatment model for the evaluation of inconsistency in a network as a whole and then, if inconsistency is detected, we will employ the loop-specific and node-splitting methods to identify which piece of evidence is responsible for inconsistency. As mentioned above, analyses will be stratified by treatment indication when clinically appropriate. Important heterogeneity and inconsistency will be explored using network meta-regression using the same methods as described above, as necessary.

Prior to conducting the network meta-analysis, we will hold a team meeting to finalize which treatment nodes will be included in the analysis since we are unclear about the indications, dosages, patient populations, and outcomes reported in all of the studies. We will discuss issues, including conducting a class versus independent drug analysis, inclusion of drug routes of administration and dosages, as well as timing of drug administration. These decisions will be examined through a sensitivity analysis in which we will classify treatment nodes using a different classification to see how stable our results are. The network meta-analysis results will be presented as summary treatment effects for each pair of treatments. Network meta-analysis will be conducted in Stata with the *mvmeta* routine [60].

A sequential approach will be used for the network meta-analysis. We will first restrict our analysis to RCTs, which will be the primary analysis of interest. We will then include data from quasi-experimental studies, and finally, data from observational studies. This will provide an understanding of the contribution of each type of study design to our summary estimates, providing us with information on how these agents work above and beyond clinical trials.

## Discussion

Epilepsy is the most common chronic neurological condition, affecting 0.6 to 1% of the population [1,2]. Given that approximately a third of patients receiving AEDs are of reproductive age and almost half of pregnancies are unplanned [61], the fetus may be exposed to these in the first trimester of pregnancy, including during the critical stage of embryogenesis [62].

The comparative safety of these agents is currently unknown and our results will be important for policy-makers, healthcare providers, and women of childbearing age. To ensure our results have wide dissemination and uptake, we will publish our results in open access journals, present our findings at scientific conferences, conduct dissemination meetings with key stakeholders (including policy-makers and healthcare providers), and produce policy briefs for Health Canada, the organization that posed this query.

## Additional files

- Additional file 1:** List of relevant medications.
- Additional file 2:** Excluded drugs.
- Additional file 3:** Draft eligibility criteria.
- Additional file 4:** MEDLINE literature search.

## Abbreviations

AEDs: Anti-epileptic drugs; RCTs: Randomized clinical trials.

## Competing interests

The authors declare that they have no competing interests.

## Authors' contributions

ACT conceived and designed the study, helped obtain funding for the study, and helped write the draft protocol. EC registered the protocol with the PROSPERO database and edited the draft protocol. AV helped write the draft protocol. CS edited the draft protocol. BH, BRH, DM, and YF provided input into the design, helped obtain funding for the study, and edited the draft protocol. SES conceived the study, designed the study, obtained the funding, and helped write the draft protocol. All authors read and approved the final protocol.

## Acknowledgements

This systematic review was funded by the Canadian Institutes of Health Research/Drug Safety and Effectiveness Network (CIHR/DSEN). ACT and BH are funded by a CIHR/DSEN New Investigator Award in Knowledge Synthesis. BRH receives funding from the Alberta Heritage Foundation for Medical Research. DM is funded by a University of Ottawa Research Chair. SES is funded by a Tier 1 Canada Research Chair in Knowledge Translation. We thank Laure Perrier for conducting the literature searches and Becky Skidmore for peer reviewing the MEDLINE search strategy. We also thank Dr. Joseph Beyene for providing feedback on our original proposal and Wing Hui and Judy Tran for formatting the paper.

## Author details

<sup>1</sup>Li Ka Shing Knowledge Institute, St. Michael's Hospital, 209 Victoria Street, East Building, Toronto, Ontario M5B 1 T8, Canada. <sup>2</sup>Institute of Health Policy Management and Evaluation, University of Toronto, Health Sciences Building, 155 College Street, Suite 425, Toronto, Ontario M5T 3 M6, Canada. <sup>3</sup>Clinical Epidemiology Program, Centre for Practice-Changing Research, Ottawa Hospital Research Institute, The Ottawa Hospital – General Campus and University of Ottawa, 501 Smyth Road, Box 711, Ottawa, Ontario K1H 8 L6, Canada. <sup>4</sup>Departments of Medicine and Community Health Sciences,

University of Calgary, TRW Building, 3rd Floor, 3280 Hospital Drive NW, Calgary, Alberta T2N 4Z6, Canada. <sup>5</sup>The Hospital for Sick Children, 555 University Avenue, Toronto, Ontario M5G 1X8, Canada. <sup>6</sup>Department of Pediatrics, University of Toronto, 172 St. George Street, Toronto, Ontario M5R 0A3, Canada. <sup>7</sup>Department of Pharmacology and Toxicology, University of Toronto, Medical Sciences Building, 1 King's College Circle, Room 4207, Toronto, Ontario M5S 1A8, Canada. <sup>8</sup>Department of Geriatric Medicine, University of Toronto, 172 St. George Street, Toronto, Ontario M5R 0A3, Canada.

Received: 9 April 2014 Accepted: 17 June 2014

Published: 25 June 2014

## References

- Hauser WA, Hesdorffer D: *Epilepsy, Frequency, Causes and Consequences*. New York: Demos Publications; 1990.
- Wiebe S, Bellhouse DR, Fallahay C, Eliasziw M: **Burden of epilepsy: the Ontario Health Survey**. *Can J Neurol Sci* 1999, **26**(4):263–270.
- Sperling MR: **The consequences of uncontrolled epilepsy**. *CNS Spectr* 2004, **9**(2):98–101. 106–109.
- Jones MW: **Consequences of epilepsy: why do we treat seizures?** *Can J Neurol Sci* 1998, **25**(4):S24–S26.
- Dickenson AH, Ghandehari J: **Anti-convulsants and anti-depressants**. *Handb Exp Pharmacol* 2007, **177**:145–177.
- Stefani A, Spadoni F, Bernardi G: **Voltage-activated calcium channels: targets of antiepileptic drug therapy?** *Epilepsia* 1997, **38**(9):959–965.
- Snutch TP, Reiner PB: **Ca<sup>2+</sup> channels: diversity of form and function**. *Curr Opin Neurobiol* 1992, **2**(3):247–253.
- Spina E, Perugi G: **Antiepileptic drugs: indications other than epilepsy**. *Epileptic Disord* 2004, **6**(2):57–75.
- Harden CL, Pennell PB, Koppel BS, Hovinga CA, Gidal B, Meador KJ, Hopp J, Ting TY, Hauser WA, Thurman D, Kaplan PW, Robinson JN, French JA, Wiebe S, Wilner AN, Vazquez B, Holmes L, Krumholz A, Finnell R, Shafer PO, Le Guen CL, American Academy of Neurology; American Epilepsy Society: **Management issues for women with epilepsy–focus on pregnancy (an evidence-based review): III. Vitamin K, folic acid, blood levels, and breast-feeding: report of the quality standards subcommittee and therapeutics and technology assessment subcommittee of the American Academy of Neurology and the American Epilepsy Society**. *Epilepsia* 2009, **50**(5):1247–1255.
- Harden CL, Meador KJ, Pennell PB, Hauser WA, Gronseth GS, French JA, Wiebe S, Thurman D, Koppel BS, Kaplan PW, Robinson JN, Hopp J, Ting TY, Gidal B, Hovinga CA, Wilner AN, Vazquez B, Holmes L, Krumholz A, Finnell R, Hirtz D, Le Guen C, American Academy of Neurology; American Epilepsy Society: **Management issues for women with epilepsy-Focus on pregnancy (an evidence-based review): II. Teratogenesis and perinatal outcomes: Report of the Quality Standards Subcommittee and Therapeutics and Technology Subcommittee of the American Academy of Neurology and the American Epilepsy Society**. *Epilepsia* 2009, **50**(5):1237–1246.
- Samren EB, van Duijn CM, Koch S, Hiilesmaa VK, Klepel H, Bardy AH, Mannagetta GB, Deichl AW, Gaily E, Granstrom ML, Meinardi H, Grobbee DE, Hofman A, Janz D, Lindhout D: **Maternal use of antiepileptic drugs and the risk of major congenital malformations: a joint European prospective study of human teratogenesis associated with maternal epilepsy**. *Epilepsia* 1997, **38**(9):981–990.
- Meador K, Reynolds MW, Crean S, Fahrback K, Probst C: **Pregnancy outcomes in women with epilepsy: a systematic review and meta-analysis of published pregnancy registries and cohorts**. *Epilepsia Res* 2008, **81**(1):1–13.
- Adab N, Jacoby A, Smith D, Chadwick D: **Additional educational needs in children born to mothers with epilepsy**. *J Neurol Neurosurg Psychiatry* 2001, **70**(1):15–21.
- Adab N, Kini U, Vinten J, Ayres J, Baker G, Clayton-Smith J, Coyle H, Fryer A, Gorry J, Gregg J, Mawer G, Nicolaidis P, Pickering L, Tunnicliffe L, Chadwick DW: **The longer term outcome of children born to mothers with epilepsy**. *J Neurol Neurosurg Psychiatry* 2004, **75**(11):1575–1583.
- Gaily E, Kantola-Sorsa E, Hiilesmaa V, Isoaho M, Matila R, Kotila M, Nylund T, Bardy A, Kaaja E, Granstrom ML: **Normal intelligence in children with prenatal exposure to carbamazepine**. *Neurology* 2004, **62**(1):28–32.
- Meador KJ, Baker GA, Browning N, Clayton-Smith J, Combs-Cantrell DT, Cohen M, Kalayjian LA, Kanner A, Liporace JD, Pennell PB, Privitera M, Loring DW, for the NEAD Study Group: **Cognitive function at 3 years of age after fetal exposure to antiepileptic drugs**. *N Engl J Med* 2009, **360**(16):1597–1605.

Tricco et al. *Systematic Reviews* 2014, **3**:68  
<http://www.systematicreviewsjournal.com/content/3/1/68>

17. Holmes LB, Wyszynski DF, Lieberman E: **The AED (antiepileptic drug) pregnancy registry: a 6-year experience.** *Arch Neurol* 2004, **61**(5):673–678.
18. Reinisch JM, Sanders SA, Mortensen EL, Rubin DB: **In utero exposure to phenobarbital and intelligence deficits in adult men.** *JAMA* 1995, **274**(19):1518–1525.
19. Morrow J, Russell A, Guthrie E, Parsons L, Robertson I, Waddell R, Irwin B, McGivern RC, Morrison PJ, Craig J: **Malformation risks of antiepileptic drugs in pregnancy: a prospective study from the UK Epilepsy and Pregnancy Register.** *J Neurol Neurosurg Psychiatry* 2006, **77**(2):193–198.
20. Meador KJ, Baker GA, Finnell RH, Kalayjian LA, Liporace JD, Loring DW, Mawer G, Pennell PB, Smith JC, Wolff MC, NEAD Study Group: **In utero antiepileptic drug exposure: fetal death and malformations.** *Neurology* 2006, **67**(3):407–412.
21. Vajda FJ, Hitchcock A, Graham J, Solinas C, O'Brien TJ, Lander CM, Eadie MJ: **Foetal malformations and seizure control: 52 months data of the Australian Pregnancy Registry.** *Eur J Neurol* 2006, **13**(6):645–654.
22. Holmes LB, Baldwin EJ, Smith CR, Habecker E, Glassman L, Wong SL, Wyszynski DF: **Increased frequency of isolated cleft palate in infants exposed to lamotrigine during pregnancy.** *Neurology* 2008, **70**(22 Pt 2):2152–2158.
23. Meador KJ, Penovich P, Baker GA, Pennell PB, Bromfield E, Pack A, Liporace JD, Sam M, Kalayjian LA, Thurman DJ, Moore E, Loring DW, NEAD Study Group: **Antiepileptic drug use in women of childbearing age.** *Epilepsy Behav* 2009, **15**(3):339–343.
24. Moher D, Shamseer L, Clarke M, Ghersi D, Liberati A, Petticrew M, Shekelle P, Stewart L: **Reporting Guidelines for Systematic Review Protocols.** In *19th Cochrane Colloquium: 19–22 October 2011; Madrid, Spain.*
25. Ross CJ, Visscher H, Siston E, Brunham LR, Pussegoda K, Loo TT, Rieder MJ, Koren G, Carleton BC, Hayden MR, CPNDS Consortium: **The Canadian Pharmacogenomics Network for Drug Safety: a model for safety pharmacology.** *Thyroid* 2010, **20**(7):681–687.
26. Eypasch E, Lefering R, Kum CK, Troidl H: **Probability of adverse events that have not yet occurred: a statistical reminder.** *BMJ* 1995, **311**(7005):619–620.
27. Atkins D: **Creating and synthesizing evidence with decision makers in mind: integrating evidence from clinical trials and other study designs.** *Med Care* 2007, **45**(10 Suppl 2):S16–S22.
28. *Health Canada: Drug Product Database.* <http://www.hc-sc.gc.ca/dhp-mps/prodpharma/databasdon/index-eng.php>.
29. *United States National Library of Medicine's ChemIDPlus Lite Database.* <http://chem.sis.nlm.nih.gov/chemidplus/chemidlite.jsp>.
30. *Canadian Pharmacists Association: E-CPS (Compendium of Pharmaceuticals and Specialties).* <http://www.e-therapeutics.ca/home.whatsnew.action>.
31. *Epilepsy Canada: Anticonvulsant Medications.* <http://www.epilepsy.ca/en-CA/Diagnosis-and-Treatment/Anticonvulsant-Medications.html>.
32. *Epilepsy Ontario: Anticonvulsant/Anti-Seizure Medication from A to Z.* <http://epilepsyontario.org/anticonvulsantanti-seizure-medication-from-a-to-z/>.
33. Sampson M, McGowan J, Cogo E, Grimshaw J, Moher D, Lefebvre C: **An evidence-based practice guideline for the peer review of electronic search strategies.** *J Clin Epidemiol* 2009, **62**(9):944–952.
34. *Canadian Agency for Drugs and Technologies in Health: Grey Matters: A Practical Search Tool for Evidence-Based Medicine.* <http://www.cadth.ca/resources/grey-matters>.
35. Adab N, Tudur SC, Vinten J, Williamson P, Winterbottom J: **Common antiepileptic drugs in pregnancy in women with epilepsy.** *Cochrane Database Syst Rev* 2004, **3**:CD004848.
36. Banach R, Boskovic R, Einarson T, Koren G: **Long-term developmental outcome of children of women with epilepsy, unexposed or exposed prenatally to antiepileptic drugs: a meta-analysis of cohort studies.** *Drug Saf* 2010, **33**(1):73–79.
37. Landis JR, Koch GG: **The measurement of observer agreement for categorical data.** *Biometrics* 1977, **33**(1):159–174.
38. *Synthesi.SR.* <http://knowledgetranslation.ca/sysrev/login.php>.
39. Stone PW: **Popping the (PICO) question in research and evidence-based practice.** *Appl Nurs Res* 2002, **15**(3):197–198.
40. *Cochrane Effective Practice and Organization of Care Group Draft Risk of Bias Tool.* <http://epoc.cochrane.org/epoc-author-resources>.
41. *The Newcastle-Ottawa Scale (NOS) for Assessing the Quality of Nonrandomised Studies in Meta-Analyses.* [http://www.ohri.ca/programs/clinical\\_epidemiology/oxford.asp](http://www.ohri.ca/programs/clinical_epidemiology/oxford.asp).
42. Santaguida PL, Raina P, Ismaila A: *The Development of the McHarm Quality Assessment Scale for Adverse Events.* Hamilton, Ontario: McMaster University; 2008.
43. Raudenbush SW: **Analyzing Effect Sizes: Random Effects Models.** In *The Handbook of Research Synthesis and Meta-analysis.* 2nd edition. Edited by Cooper H, Hedges LV, Valentine JC. New York: Russell Sage Foundation; 2009:295–315.
44. Viechtbauer W: **Bias and efficiency of meta-analytic variance estimators in the random-effects model.** *J Educ Behav Stat* 2005, **30**(3):261–293.
45. Higgins JP, Thompson SG: **Quantifying heterogeneity in a meta-analysis.** *Stat Med* 2002, **21**(11):1539–1558.
46. Viechtbauer W: **Confidence intervals for the amount of heterogeneity in meta-analysis.** *Stat Med* 2007, **26**(1):37–52.
47. Higgins JPT, Green S: *Cochrane Handbook for Systematic Reviews of Interventions.* The Cochrane Collaboration; 2009. <http://www.cochrane.org/handbook>.
48. Sweeting MJ, Sutton AJ, Lambert PC: **What to add to nothing? Use and avoidance of continuity corrections in meta-analysis of sparse data.** *Stat Med* 2004, **23**(9):1351–1375.
49. Bradburn MJ, Deeks JJ, Berlin JA, Russell Localio A: **Much ado about nothing: a comparison of the performance of meta-analytical methods with rare events.** *Stat Med* 2007, **26**(1):53–77.
50. Littell JH, Corcoran J, Pillai V: *Systematic Reviews and Meta-Analysis.* New York: Oxford University Press; 2008.
51. Carpenter J, Rucker G, Schwarzer G: **Assessing the sensitivity of meta-analysis to selection bias: a multiple imputation approach.** *Biometrics* 2011, **67**(3):1066–1072.
52. *Conducting Meta-Analyses in R with the metafor Package.* <http://www.jstatsoft.org/v36/i03/>.
53. Salanti G, Ades AE, Ioannidis JP: **Graphical methods and numerical summaries for presenting results from multiple-treatment meta-analysis: an overview and tutorial.** *J Clin Epidemiol* 2011, **64**(2):163–171.
54. Salanti G: **Indirect and mixed-treatment comparison, network, or multiple-treatments meta-analysis: many names, many benefits, many concerns for the next generation evidence synthesis tool.** *Res Synth Methods* 2012, **3**(2):80–97.
55. Song F, Altman DG, Glenny AM, Deeks JJ: **Validity of indirect comparison for estimating efficacy of competing interventions: empirical evidence from published meta-analyses.** *BMJ* 2003, **326**(7387):472.
56. Veroniki AA, Vasiliadis HS, Higgins JP, Salanti G: **Evaluation of inconsistency in networks of interventions.** *Int J Epidemiol* 2013, **42**(1):332–345.
57. Dias S, Welton NJ, Caldwell DM, Ades AE: **Checking consistency in mixed treatment comparison meta-analysis.** *Stat Med* 2010, **29**(7–8):932–944.
58. White IR, Barrett JK, Jackson D, Higgins JPT: **Consistency and inconsistency in network meta-analysis: model estimation using multivariate meta-regression.** *Res Synth Methods* 2012, **3**(2):111–125.
59. Jackson D, Barrett JK, Stephen R, White IR, Higgins JPT: **A design-by-treatment interaction model for network meta-analysis with random inconsistency effects.** *Stat Med* 2014, In press.
60. White IR: **Multivariate random-effects meta-regression: updates to mvmeta.** *Stata J* 2011, **11**(2):255–270.
61. Centers for Disease Control and Prevention: *Unintended Pregnancy Prevention.* <http://www.cdc.gov/reproductivehealth/unintendedpregnancy/>.
62. Yerby MS: **Pregnancy, teratogenesis, and epilepsy.** *Neurol Clin* 1994, **12**(4):749–771.

doi:10.1186/2046-4053-3-68

**Cite this article as:** Tricco et al.: Comparative safety of anti-epileptic drugs among infants and children exposed *in utero* or during breastfeeding: protocol for a systematic review and network meta-analysis. *Systematic Reviews* 2014 **3**:68.

## PRISMA NMA Checklist

| Section/Topic             | Item # | Checklist Item *                                                                                                                                                                                                                                                                                                                                                                                                                                                                                                                                                                                                                                                                                                                                                                        | Reported on Page # |
|---------------------------|--------|-----------------------------------------------------------------------------------------------------------------------------------------------------------------------------------------------------------------------------------------------------------------------------------------------------------------------------------------------------------------------------------------------------------------------------------------------------------------------------------------------------------------------------------------------------------------------------------------------------------------------------------------------------------------------------------------------------------------------------------------------------------------------------------------|--------------------|
| <b>TITLE</b>              |        |                                                                                                                                                                                                                                                                                                                                                                                                                                                                                                                                                                                                                                                                                                                                                                                         |                    |
| Title                     | 1      | Identify the report as a systematic review incorporating a network meta-analysis (or related form of meta-analysis).                                                                                                                                                                                                                                                                                                                                                                                                                                                                                                                                                                                                                                                                    | 1                  |
| <b>ABSTRACT</b>           |        |                                                                                                                                                                                                                                                                                                                                                                                                                                                                                                                                                                                                                                                                                                                                                                                         |                    |
| Structured summary        | 2      | Provide a structured summary including, as applicable:<br><b>Background:</b> main objectives<br><b>Methods:</b> data sources; study eligibility criteria, participants, and interventions; study appraisal; and <i>synthesis methods, such as network meta-analysis</i> .<br><b>Results:</b> number of studies and participants identified; summary estimates with corresponding confidence/credible intervals; <i>treatment rankings may also be discussed. Authors may choose to summarize pairwise comparisons against a chosen treatment included in their analyses for brevity.</i><br><b>Discussion/Conclusions:</b> limitations; conclusions and implications of findings.<br><b>Other:</b> primary source of funding; systematic review registration number with registry name. | 4-5                |
| <b>INTRODUCTION</b>       |        |                                                                                                                                                                                                                                                                                                                                                                                                                                                                                                                                                                                                                                                                                                                                                                                         |                    |
| Rationale                 | 3      | Describe the rationale for the review in the context of what is already known, <i>including mention of why a network meta-analysis has been conducted.</i>                                                                                                                                                                                                                                                                                                                                                                                                                                                                                                                                                                                                                              | 7                  |
| Objectives                | 4      | Provide an explicit statement of questions being addressed, with reference to participants, interventions, comparisons, outcomes, and study design (PICOS).                                                                                                                                                                                                                                                                                                                                                                                                                                                                                                                                                                                                                             | 7                  |
| <b>METHODS</b>            |        |                                                                                                                                                                                                                                                                                                                                                                                                                                                                                                                                                                                                                                                                                                                                                                                         |                    |
| Protocol and registration | 5      | Indicate whether a review protocol exists and if and where it can be accessed (e.g., Web address); and, if available, provide registration information,                                                                                                                                                                                                                                                                                                                                                                                                                                                                                                                                                                                                                                 | 8                  |

|                                        |    |                                                                                                                                                                                                                                                                                                                                                                                   |                            |
|----------------------------------------|----|-----------------------------------------------------------------------------------------------------------------------------------------------------------------------------------------------------------------------------------------------------------------------------------------------------------------------------------------------------------------------------------|----------------------------|
|                                        |    | including registration number.                                                                                                                                                                                                                                                                                                                                                    |                            |
| Eligibility criteria                   | 6  | Specify study characteristics (e.g., PICOS, length of follow-up) and report characteristics (e.g., years considered, language, publication status) used as criteria for eligibility, giving rationale. <i>Clearly describe eligible treatments included in the treatment network, and note whether any have been clustered or merged into the same node (with justification).</i> | 8-9                        |
| Information sources                    | 7  | Describe all information sources (e.g., databases with dates of coverage, contact with study authors to identify additional studies) in the search and date last searched.                                                                                                                                                                                                        | 9 (see also Appendix C)    |
| Search                                 | 8  | Present full electronic search strategy for at least one database, including any limits used, such that it could be repeated.                                                                                                                                                                                                                                                     | Additional File 1          |
| Study selection                        | 9  | State the process for selecting studies (i.e., screening, eligibility, included in systematic review, and, if applicable, included in the meta-analysis).                                                                                                                                                                                                                         | 9 (see also Appendix C)    |
| Data collection process                | 10 | Describe method of data extraction from reports (e.g., piloted forms, independently, in duplicate) and any processes for obtaining and confirming data from investigators.                                                                                                                                                                                                        | 9 (see also Appendix C)    |
| Data items                             | 11 | List and define all variables for which data were sought (e.g., PICOS, funding sources) and any assumptions and simplifications made.                                                                                                                                                                                                                                             | Additional File 1          |
| Geometry of the network                | S1 | Describe methods used to explore the geometry of the treatment network under study and potential biases related to it. This should include how the evidence base has been graphically summarized for presentation, and what characteristics were compiled and used to describe the evidence base to readers.                                                                      | 9-12 (see also Appendix C) |
| Risk of bias within individual studies | 12 | Describe methods used for assessing risk of bias of individual studies (including specification of whether this was done at the study or outcome level), and how this information is to be used in any data synthesis.                                                                                                                                                            | 9                          |
| Summary measures                       | 13 | State the principal summary measures (e.g., risk ratio, difference in means). <i>Also describe the use of additional summary measures assessed, such as treatment rankings and surface under the cumulative ranking curve (SUCRA) values, as well as modified approaches used to present</i>                                                                                      | 9-12                       |

|                                          |    |                                                                                                                                                                                                                                                                                                                                                                                                                                                   |                             |
|------------------------------------------|----|---------------------------------------------------------------------------------------------------------------------------------------------------------------------------------------------------------------------------------------------------------------------------------------------------------------------------------------------------------------------------------------------------------------------------------------------------|-----------------------------|
|                                          |    | <i>summary findings from meta-analyses.</i>                                                                                                                                                                                                                                                                                                                                                                                                       |                             |
| Planned methods of analysis              | 14 | Describe the methods of handling data and combining results of studies for each network meta-analysis. This should include, but not be limited to: <ul style="list-style-type: none"> <li>• <i>Handling of multi-arm trials;</i></li> <li>• <i>Selection of variance structure;</i></li> <li>• <i>Selection of prior distributions in Bayesian analyses; and</i></li> <li>• <i>Assessment of model fit.</i></li> </ul>                            | 9-12 (see also Appendix C)  |
| Assessment of Inconsistency              | S2 | Describe the statistical methods used to evaluate the agreement of direct and indirect evidence in the treatment network(s) studied. Describe efforts taken to address its presence when found.                                                                                                                                                                                                                                                   | 10 (see also Appendix C)    |
| Risk of bias across studies              | 15 | Specify any assessment of risk of bias that may affect the cumulative evidence (e.g., publication bias, selective reporting within studies).                                                                                                                                                                                                                                                                                                      | 9 (see also Appendix C)     |
| Additional analyses                      | 16 | Describe methods of additional analyses if done, indicating which were pre-specified. This may include, but not be limited to, the following: <ul style="list-style-type: none"> <li>• Sensitivity or subgroup analyses;</li> <li>• Meta-regression analyses;</li> <li>• <i>Alternative formulations of the treatment network; and</i></li> <li>• <i>Use of alternative prior distributions for Bayesian analyses (if applicable).</i></li> </ul> | 10-12 (see also Appendix C) |
| <b>RESULTS<sup>†</sup></b>               |    |                                                                                                                                                                                                                                                                                                                                                                                                                                                   |                             |
| Study selection                          | 17 | Give numbers of studies screened, assessed for eligibility, and included in the review, with reasons for exclusions at each stage, ideally with a flow diagram.                                                                                                                                                                                                                                                                                   | 13 and Figure 1             |
| <b>Presentation of network structure</b> | S3 | Provide a network graph of the included studies to enable visualization of the geometry of the treatment network.                                                                                                                                                                                                                                                                                                                                 | Figure 2                    |
| <b>Summary of network geometry</b>       | S4 | Provide a brief overview of characteristics of the treatment network. This may include commentary on the abundance of trials and randomized patients for the different interventions and pairwise comparisons in the network, gaps of evidence in the treatment network, and potential biases reflected by the network structure.                                                                                                                 | 14-18 (see also Appendix L) |
| Study characteristics                    | 18 | For each study, present characteristics for which data were extracted (e.g., study size, PICOS,                                                                                                                                                                                                                                                                                                                                                   | Table 1, Appendices H       |

|                                      |           |                                                                                                                                                                                                                                                                                                                                                                                                                                                              |                                                        |
|--------------------------------------|-----------|--------------------------------------------------------------------------------------------------------------------------------------------------------------------------------------------------------------------------------------------------------------------------------------------------------------------------------------------------------------------------------------------------------------------------------------------------------------|--------------------------------------------------------|
|                                      |           | follow-up period) and provide the citations.                                                                                                                                                                                                                                                                                                                                                                                                                 | and I                                                  |
| Risk of bias within studies          | 19        | Present data on risk of bias of each study and, if available, any outcome level assessment.                                                                                                                                                                                                                                                                                                                                                                  | Appendix J                                             |
| Results of individual studies        | 20        | For all outcomes considered (benefits or harms), present, for each study: 1) simple summary data for each intervention group, and 2) effect estimates and confidence intervals. <i>Modified approaches may be needed to deal with information from larger networks.</i>                                                                                                                                                                                      | N/A (data can be provided by the corresponding author) |
| Synthesis of results                 | 21        | Present results of each meta-analysis done, including confidence/credible intervals. <i>In larger networks, authors may focus on comparisons versus a particular comparator (e.g. placebo or standard care), with full findings presented in an appendix. League tables and forest plots may be considered to summarize pairwise comparisons.</i> If additional summary measures were explored (such as treatment rankings), these should also be presented. | Figure 3, Appendices L, M, O                           |
| <b>Exploration for inconsistency</b> | <b>S5</b> | Describe results from investigations of inconsistency. This may include such information as measures of model fit to compare consistency and inconsistency models, <i>P</i> values from statistical tests, or summary of inconsistency estimates from different parts of the treatment network.                                                                                                                                                              | 14 (see also Appendix L)                               |
| Risk of bias across studies          | 22        | Present results of any assessment of risk of bias across studies for the evidence base being studied.                                                                                                                                                                                                                                                                                                                                                        | 14 (see also Appendix K)                               |
| Results of additional analyses       | 23        | Give results of additional analyses, if done (e.g., sensitivity or subgroup analyses, meta-regression analyses, <i>alternative network geometries studied, alternative choice of prior distributions for Bayesian analyses, and so forth</i> ).                                                                                                                                                                                                              | Appendix M                                             |
| <b>DISCUSSION</b>                    |           |                                                                                                                                                                                                                                                                                                                                                                                                                                                              |                                                        |
| Summary of evidence                  | 24        | Summarize the main findings, including the strength of evidence for each main outcome; consider their relevance to key groups (e.g., healthcare providers, users, and policy-makers).                                                                                                                                                                                                                                                                        | 19-21                                                  |
| Limitations                          | 25        | Discuss limitations at study and outcome level (e.g., risk of bias), and at review level (e.g., incomplete retrieval of identified research, reporting bias). <i>Comment on the validity of the assumptions, such as transitivity and consistency. Comment on any concerns regarding network</i>                                                                                                                                                             | 21-23                                                  |



|                |    |                                                                                                                                                                                                                                                                                                                                                                                                                                |       |
|----------------|----|--------------------------------------------------------------------------------------------------------------------------------------------------------------------------------------------------------------------------------------------------------------------------------------------------------------------------------------------------------------------------------------------------------------------------------|-------|
|                |    | <i>geometry (e.g., avoidance of certain comparisons).</i>                                                                                                                                                                                                                                                                                                                                                                      |       |
| Conclusions    | 26 | Provide a general interpretation of the results in the context of other evidence, and implications for future research.                                                                                                                                                                                                                                                                                                        | 23    |
| <b>FUNDING</b> |    |                                                                                                                                                                                                                                                                                                                                                                                                                                |       |
| Funding        | 27 | Describe sources of funding for the systematic review and other support (e.g., supply of data); role of funders for the systematic review. This should also include information regarding whether funding has been received from manufacturers of treatments in the network and/or whether some of the authors are content experts with professional conflicts of interest that could affect use of treatments in the network. | 27-28 |

**Abbreviations:** PICOS - population, intervention, comparators, outcomes, study design

\* Text in italics indicates wording specific to reporting of network meta-analyses that has been added to guidance from the PRISMA statement.

† Authors may wish to plan for use of appendices to present all relevant information in full detail for items in this section.

## Supplementary Online Content

---

|                                                                                                                                                                                            |    |
|--------------------------------------------------------------------------------------------------------------------------------------------------------------------------------------------|----|
| Appendix A. Outcome measures and diagnostic scales used in analysis .....                                                                                                                  | 2  |
| Appendix B. Additional Information on the Methods .....                                                                                                                                    | 4  |
| Information sources .....                                                                                                                                                                  | 4  |
| Study selection and data collection .....                                                                                                                                                  | 4  |
| Appraisal of selection bias using the comparison-adjusted funnel plot .....                                                                                                                | 4  |
| Additional details on the synthesis of included studies .....                                                                                                                              | 4  |
| References .....                                                                                                                                                                           | 5  |
| Appendix C. Newcastle-Ottawa Scale scoring guide .....                                                                                                                                     | 7  |
| Appendix D. List of included studies .....                                                                                                                                                 | 17 |
| Appendix E. Additional information on search results .....                                                                                                                                 | 19 |
| Appendix F. Key excluded studies .....                                                                                                                                                     | 20 |
| References .....                                                                                                                                                                           | 21 |
| Appendix G. Table of Individual Study characteristics .....                                                                                                                                | 22 |
| Appendix H. Table of Patient characteristics .....                                                                                                                                         | 27 |
| Appendix I. Methodological quality of observational studies – Newcastle Ottawa Scale results                                                                                               | 29 |
| Appendix J. Comparison-adjusted funnel plots* .....                                                                                                                                        | 31 |
| Appendix K. Statistically significant network meta-analysis results along with meta-analysis results, transitivity, and inconsistency assessments .....                                    | 32 |
| Appendix L. Frequencies, events and samples sizes, SUCRA values, and total group risks per treatment and outcome .....                                                                     | 37 |
| Appendix M. Rank-heat plot of cognitive developmental delay, autism/dyspraxia, psychomotor developmental delay, language delay, and attention deficit hyperactivity disorder outcomes* ... | 41 |
| Appendix N. Number of studies and treatments per outcome .....                                                                                                                             | 43 |

### Appendix A. Outcome measures and diagnostic scales used in analysis

| <b>Cognitive developmental delay</b>                          |                                                                                                                                                                                                                               |
|---------------------------------------------------------------|-------------------------------------------------------------------------------------------------------------------------------------------------------------------------------------------------------------------------------|
| Bayley Scales of Infant Development (children $\leq 42$ mo.)  | Score $\geq 2$ standard deviations below the mean                                                                                                                                                                             |
| Griffiths Scale of Infant Development (children $> 42$ mo.)   | Score $\geq 2$ standard deviations below the mean                                                                                                                                                                             |
| McCarthy Scales of Children's Abilities (children $> 30$ mo.) | Score $\geq 1$ standard deviations below the mean                                                                                                                                                                             |
| Stanford-Binet IV Intelligence scale for children             | Intelligence quotient $\leq 80$                                                                                                                                                                                               |
| Touwen's Test                                                 | Above average number of items rated abnormal in one or more domains                                                                                                                                                           |
| Wechsler Scale of Preschool and Primary Intelligence          | Intelligence quotient $< 90$                                                                                                                                                                                                  |
| Wechsler Intelligence Scale for Children - III                | Intelligence quotient $< 80$ ; verbal intelligence quotient $< 69$                                                                                                                                                            |
| Developmental Assessment                                      | Confirmed diagnosis by developmental pediatrician or pediatric neurologist                                                                                                                                                    |
| <b>Autism/dyspraxia</b>                                       |                                                                                                                                                                                                                               |
| Developmental Assessment                                      | Diagnosis confirmed by developmental specialists at 2 years of age                                                                                                                                                            |
| Medical Records                                               | Confirmed diagnosis recorded in medical history; registry records (ICD-10 codes F84.0, F84.1, F84.5, F84.8, and F84.9)                                                                                                        |
| Modified checklist for autism in toddlers                     | Scored positive for $\geq 2$ out of 6 critical items OR $\geq 3$ any items of the total scale                                                                                                                                 |
| <b>Psychomotor developmental delay</b>                        |                                                                                                                                                                                                                               |
| Ages and Stages Questionnaire                                 | $> 3$ standard deviations from the test mean                                                                                                                                                                                  |
| Bayley Scales of Infant Development – Psychomotor Index       | $> 2$ standard deviations below the standardized mean for the test                                                                                                                                                            |
| Touwen's Test                                                 | Demonstrated dysfunctions in fine motor balance, fine motor functions, and coordination of extremities                                                                                                                        |
| Schedule of Growing Skills II                                 | Scored as 'delayed' in $\geq 1$ domain of the test                                                                                                                                                                            |
| Developmental Assessment                                      | Infant scored $> 2$ negative items (administered by general practitioner or pediatrician); diagnosis of neuromotor deficit confirmed by a trained nurse practitioner; infant failing to sit by 10 months or walk by 18 months |
| Health/Medical Records                                        | Diagnosis of psychomotor delay recorded in medical records                                                                                                                                                                    |

|                                                                                                                                                                                                                     |                                                                                                                                                                                                               |
|---------------------------------------------------------------------------------------------------------------------------------------------------------------------------------------------------------------------|---------------------------------------------------------------------------------------------------------------------------------------------------------------------------------------------------------------|
| <b>Language Delay</b>                                                                                                                                                                                               |                                                                                                                                                                                                               |
| Ages and Stages Questionnaire                                                                                                                                                                                       | >3 standard deviations from the test mean                                                                                                                                                                     |
| Clinical Evaluation of Language Fundamentals – 4 <sup>th</sup> Edition                                                                                                                                              | Score <70 in core language domain; score <84 overall                                                                                                                                                          |
| Learning Accomplishment Profile                                                                                                                                                                                     | Below average performance in expressive speech (adjusted for age)                                                                                                                                             |
| Comprehensive Language Assessment (Peabody Picture Vocabulary Test; Receptive Expressive Emergent Language Scale; Expressive One Word Picture Vocabulary Test, or Sequenced Inventory of Communication Development) | Scores/assessment indicate a >6 moth delay in age appropriate language development                                                                                                                            |
| <b>ADHD</b>                                                                                                                                                                                                         |                                                                                                                                                                                                               |
| Attention Problems and Hyperactivity Scales                                                                                                                                                                         | Score >1 standard deviations from the test mean                                                                                                                                                               |
| Child Behaviour Checklist                                                                                                                                                                                           | ≥6 positive items on checklist                                                                                                                                                                                |
| Diagnostic and Statistical Manual – IV                                                                                                                                                                              | ≥5 positive items on checklist                                                                                                                                                                                |
| Medical Records                                                                                                                                                                                                     | Confirmed diagnosis in hospital/medical records made by a pediatrician or child psychiatrist                                                                                                                  |
| <b>Neonatal Seizure</b>                                                                                                                                                                                             |                                                                                                                                                                                                               |
| Medical records                                                                                                                                                                                                     | Record of seizures during 1 <sup>st</sup> year; confirmation of neonatal seizure by electroencephalography or diagnosis                                                                                       |
| <b>Social Impairment</b>                                                                                                                                                                                            |                                                                                                                                                                                                               |
| Developmental Assessment (Ages and Stages Questionnaire [6 and 18 months]; Child Behaviour Checklist [36 months])                                                                                                   | Scores dichotomized into ‘normal’ or ‘adverse’ range based on pre-defined values used by scale, for scales without pre-defined values cut-off was set at a score >2 standard deviations outside the test mean |

## Appendix B. Additional Information on the Methods

### Information sources

An experienced librarian executed search strategies for MEDLINE, EMBASE, and the Cochrane Central Register of Controlled Trials. The search strategy for MEDLINE was peer reviewed by another librarian using the PRESS checklist,<sup>1</sup> and is available in the protocol.<sup>2</sup> The literature search was initially conducted from inception to March 18, 2014, and a rapid search update of these databases was subsequently conducted on December 15, 2015. Authors of AED studies were contacted for unpublished study data, and the reference lists of all included studies were scanned to identify additional studies.

### Study selection and data collection

Prior to screening, two pilot-tests were conducted to assess the eligibility criteria and screening form. Once reviewers reached  $\geq 80\%$  agreement, pairs of reviewers independently screened titles and abstracts (level 1) and later screened potentially relevant full-text articles (level 2). Upon completion of title and abstract screening, 6% of citations were discrepant between reviewer pairs and had to be resolved by discussion or a third reviewer. At the conclusion of full-text screening, 16% of articles were discrepant and had to be resolved by discussion. The same process was used for data abstraction and quality appraisal. Three rounds of pilot testing were conducted prior to data abstraction to train reviewers and refine the data abstraction form. For studies published in the last 10 years, authors were contacted to request clarification or additional data.

### Appraisal of selection bias using the comparison-adjusted funnel plot

All eligible medications were ordered from oldest to newest using their international market approval dates. To overcome some of the correlations induced by multi-arm studies, which may possibly cause overestimation and mask funnel plot asymmetry, we plotted data points corresponding to the study-specific basic parameters (treatment comparisons with common comparator). In each study, we used the control group as the common comparator or if this was missing, we used the oldest treatment comparator against the remaining AEDs. We used the fixed-effect model, as the random-effects model gives more weight to smaller studies and this may impact the assessment of small-study effects. We planned to explore observed asymmetry through subgroup analysis or meta-regression.

### Additional details on the synthesis of included studies

Due to the complexity of the data and the studies' underreporting, differences in drug dosages could not be accounted for, and it was assumed that different dosages of the same AED were equally effective. When a study reported multiple dosages for the same treatment, we combined the data for this treatment. We assessed the transitivity assumption for each outcome *a priori* using the treatment effect modifiers: age, baseline risk, treatment indication, timing, and methodological quality. The mean of each continuous effect modifier and the mode of each categorical effect modifier for each pairwise comparison were presented in tables for each outcome.<sup>3</sup> The consistency assumption was evaluated for the entire network of each outcome

1  
2  
3 using the design-by-treatment interaction model.<sup>4</sup> If inconsistency was identified, further  
4 examination for local inconsistency in parts of the network was completed using the loop-  
5 specific method.<sup>5,6</sup> Common within-network between-study variance ( $\tau^2$ ) across treatment  
6 comparisons was assumed in the conventional meta-analysis, NMA, and design-by-treatment  
7 interaction model, so that treatment comparisons including a single study can borrow strength  
8 from the remaining network. This assumption was clinically reasonable, as the treatments  
9 included were of the same nature. In the loop-specific approach, common within-loop  $\tau^2$  was  
10 assumed.  
11  
12

13  
14 For cognitive developmental delay and autism/dyspraxia outcomes, network meta-regression  
15 analyses for maternal age and baseline risk (i.e., using the control group) were conducted, when  
16 at least 10 studies provided relevant information, assuming a common fixed coefficient across  
17 treatment comparisons. Sensitivity analyses for cognitive developmental delay and  
18 autism/dyspraxia outcomes were performed for studies with the treatment indication of epilepsy,  
19 large study size (i.e., >300), maternal alcohol intake, maternal tobacco use, only first-generation  
20 AEDs, and higher methodological quality for the two items of the Newcastle-Ottawa Scale that  
21 had the highest percentage of low methodological quality (adequacy of follow-up of cohorts and  
22 comparability of cohorts items for cohort studies). Severity of epilepsy, which may be a risk  
23 factor variable, was not evaluated in our analyses since this was not commonly reported. For  
24 autism/dyspraxia, a sensitivity analysis on maternal IQ/psychiatric history was additionally  
25 conducted. We measured the goodness of fit using the posterior mean of the residual deviance,  
26 the degree of between-study heterogeneity, and the deviance information criterion. In a well-  
27 fitting model the posterior mean residual deviance should be close to the number of data points.<sup>7</sup>  
28 <sup>8</sup> A difference of 3 units in the deviance information criterion was considered important and the  
29 lowest value of the deviance information criterion corresponded to the model with the best fit.<sup>7,8</sup>  
30  
31  
32  
33

34 All analyses were conducted in OpenBUGS,<sup>9</sup> assuming non-informative priors for all model  
35 parameters and a half normal prior distribution for the between-study standard deviation  
36 ( $\tau \sim N(0,1), \tau > 0$ ). The first 10,000 iterations were discarded and then 100,000 simulations were  
37 run with thinning of 10 values. Convergence was checked by visual inspection of the evaluation  
38 of the mixing of two chains. The median and 95% CrI were calculated for each parameter value,  
39 since medians are not overly influenced by outliers. The *network* command<sup>10</sup> was used to apply  
40 the design-by-treatment interaction model.  
41  
42  
43  
44

## 45 References

- 46 1. McGowan J, Sampson M, Salzwedel DM, Cogo E, Foerster V, Lefebvre C. PRESS Peer Review  
47 of Electronic Search Strategies: 2015 Guideline Statement. *J Clin Epidemiol.* 2016;75:40-6.
- 48 2. Tricco AC, Cogo E, Angeliki VA, et al. Comparative safety of anti-epileptic drugs among infants  
49 and children exposed in utero or during breastfeeding: protocol for a systematic review and network  
50 meta-analysis. *Syst Rev.* 2014;3:68.
- 51 3. Jansen JP, Naci H. Is network meta-analysis as valid as standard pairwise meta-analysis? It all  
52 depends on the distribution of effect modifiers. *BMC Med.* 2013;11:159.
- 53 4. White IR, Barrett JK, Jackson D, Higgins JP. Consistency and inconsistency in network meta-  
54 analysis: model estimation using multivariate meta-regression. *Res Synth Methods.* 2012;3(2):111-25.
- 55 5. Song F, Altman DG, Glenny AM, Deeks JJ. Validity of indirect comparison for estimating efficacy  
56 of competing interventions: empirical evidence from published meta-analyses. *BMJ.* 2003;326(7387):472.  
57  
58  
59  
60

- 1
  - 2
  - 3
  - 4
  - 5
  - 6
  - 7
  - 8
  - 9
  - 10
  - 11
  - 12
  - 13
  - 14
  - 15
  - 16
  - 17
  - 18
  - 19
  - 20
  - 21
  - 22
  - 23
  - 24
  - 25
  - 26
  - 27
  - 28
  - 29
  - 30
  - 31
  - 32
  - 33
  - 34
  - 35
  - 36
  - 37
  - 38
  - 39
  - 40
  - 41
  - 42
  - 43
  - 44
  - 45
  - 46
  - 47
  - 48
  - 49
  - 50
  - 51
  - 52
  - 53
  - 54
  - 55
  - 56
  - 57
  - 58
  - 59
  - 60
6. Veroniki AA, Vasiliadis HS, Higgins JP, Salanti G. Evaluation of inconsistency in networks of interventions. *Int J Epidemiol*. 2013;42(1):332-45.
7. Welton NJ, Sutton AJ, Cooper N, Abrams KR, Ades A. Evidence synthesis for decision making in healthcare. New York: Wiley; 2012.
8. Spiegelhalter DJ, Best NG, Carlin BP, Van Der Linde A. Bayesian measures of model complexity and fit. *J R Stat Soc Ser B Stat Methodol*. 2002;64(4):583-639.
9. Lunn D, Spiegelhalter D, Thomas A, Best N. The BUGS project: Evolution, critique and future directions. *Stat Med*. 2009;28(25):3049-67.
10. Palmer T, Sterne J. Meta-Analysis in Stata: An Updated Collection from the Stata Journal. White I, editor. Texas: Stata Press; 2016.

For peer review only

1  
2  
3  
4  
5  
6  
7  
8  
9  
10  
11  
12  
13  
14  
15  
16  
17  
18  
19  
20  
21  
22  
23  
24  
25  
26  
27  
28  
29  
30  
31  
32  
33  
34  
35  
36  
37  
38  
39  
40  
41  
42  
43  
44  
45  
46  
47  
48  
49

### Appendix C. Newcastle-Ottawa Scale scoring guide

#### COHORT Studies

| Excel Column                                        | NOS* Answer Options**                                                                                                                                                                                                                                                                                                                                       | NOS Coding Manual*                                                                                                                                                                                                                                                                                                                                                                                                                                                                                                                                                                                                                                                                                                                                                                                                                                                                                                                                                                             |
|-----------------------------------------------------|-------------------------------------------------------------------------------------------------------------------------------------------------------------------------------------------------------------------------------------------------------------------------------------------------------------------------------------------------------------|------------------------------------------------------------------------------------------------------------------------------------------------------------------------------------------------------------------------------------------------------------------------------------------------------------------------------------------------------------------------------------------------------------------------------------------------------------------------------------------------------------------------------------------------------------------------------------------------------------------------------------------------------------------------------------------------------------------------------------------------------------------------------------------------------------------------------------------------------------------------------------------------------------------------------------------------------------------------------------------------|
| <b>RefID</b>                                        | Enter the report's RefID.                                                                                                                                                                                                                                                                                                                                   |                                                                                                                                                                                                                                                                                                                                                                                                                                                                                                                                                                                                                                                                                                                                                                                                                                                                                                                                                                                                |
| <b>DA</b>                                           | Enter your initials.                                                                                                                                                                                                                                                                                                                                        |                                                                                                                                                                                                                                                                                                                                                                                                                                                                                                                                                                                                                                                                                                                                                                                                                                                                                                                                                                                                |
| <b>First author</b>                                 | Enter the first author's last name.                                                                                                                                                                                                                                                                                                                         |                                                                                                                                                                                                                                                                                                                                                                                                                                                                                                                                                                                                                                                                                                                                                                                                                                                                                                                                                                                                |
| <b>Year of publication</b>                          | Enter the year of the publication.                                                                                                                                                                                                                                                                                                                          |                                                                                                                                                                                                                                                                                                                                                                                                                                                                                                                                                                                                                                                                                                                                                                                                                                                                                                                                                                                                |
| <b>SELECTION:</b>                                   |                                                                                                                                                                                                                                                                                                                                                             |                                                                                                                                                                                                                                                                                                                                                                                                                                                                                                                                                                                                                                                                                                                                                                                                                                                                                                                                                                                                |
| <b>1) Representative-ness of the exposed cohort</b> | <ul style="list-style-type: none"> <li>a) truly representative of the average pregnant woman taking AEDs in the community</li> <li>b) somewhat representative of the average pregnant woman taking AEDs in the community</li> <li>c) selected group of users e.g., nurses, volunteers</li> <li>d) no description of the derivation of the cohort</li> </ul> | <p>Item is assessing the representativeness of exposed individuals in the community, not the representativeness of the sample of women from some general population.</p> <p>For example, subjects derived from groups likely to contain middle class, better educated, health oriented women are likely to be representative of postmenopausal estrogen users while they are not representative of all women (e.g. members of a health maintenance organisation (HMO) will be a representative sample of estrogen users. While the HMO may have an under-representation of ethnic groups, the poor, and poorly educated, these excluded groups are not the predominant users of estrogen).</p> <p><u>Note:</u><br/>Truly representative (A) is a population-based cohort at the provincial or national levels (e.g., a sample from 2 cities is not enough). We need very 'broad' sample of the population.</p> <p>Somewhat representative (B) includes private clinics, hospital-based, or</p> |



|                                                                                    |                                                                                                                                                                                                                           |                                                                                                                                                                                                                                                                                                                                                                                                                                                                             |
|------------------------------------------------------------------------------------|---------------------------------------------------------------------------------------------------------------------------------------------------------------------------------------------------------------------------|-----------------------------------------------------------------------------------------------------------------------------------------------------------------------------------------------------------------------------------------------------------------------------------------------------------------------------------------------------------------------------------------------------------------------------------------------------------------------------|
|                                                                                    |                                                                                                                                                                                                                           | community-based.                                                                                                                                                                                                                                                                                                                                                                                                                                                            |
| <b>2) Selection of the non-exposed cohort</b>                                      | <ul style="list-style-type: none"> <li>a) drawn from the same community as the exposed cohort</li> <li>b) drawn from a different source</li> <li>c) no description of the derivation of the non-exposed cohort</li> </ul> | <p><u>Note:</u><br/>In our review of mostly multi-arm studies, this question pertains to the study's comparator group(s) – including “active” controls (for example, a less teratogenic AED). Therefore, this will often be ‘A’ for our studies.</p>                                                                                                                                                                                                                        |
| <b>3) Ascertainment of exposure</b>                                                | <ul style="list-style-type: none"> <li>a) secure record (e.g., surgical records)</li> <li>b) structured interview</li> <li>c) written self-report</li> <li>d) no description</li> </ul>                                   | <p><u>Note:</u><br/>Option ‘A’ includes patient hospital records, prescription drug database, or hospital/clinic visits (e.g., patient is asked about “current” AED use during a visit with their doctor).</p> <p>Option ‘B’ includes a hospital/clinic visit, but the patients are asked to remember their AED use during pregnancy (e.g., retrospectively ascertained exposure).</p> <p>If a study used both medical records and interviews for everyone, select ‘A’.</p> |
| <b>4) Demonstration that outcome of interest was not present at start of study</b> | <ul style="list-style-type: none"> <li>a) yes</li> <li>b) no</li> </ul>                                                                                                                                                   | <p>In the case of mortality studies, outcome of interest is still the presence of a disease/incident, rather than death. That is to say that a statement of ‘no history of disease or incident’ earns a star (i.e. option ‘A’).</p> <p><u>Note:</u><br/>Since our review is on pregnant women, this question is ‘A’ for all.<br/><b>Please email us if a study involves breastfeeding women.</b></p>                                                                        |
| <b>COMPARABILITY:</b>                                                              |                                                                                                                                                                                                                           |                                                                                                                                                                                                                                                                                                                                                                                                                                                                             |
| <b>1) Comparability of cohorts on the basis of the design or analysis</b>          | <ul style="list-style-type: none"> <li>a) answer is BOTH B &amp; C (i.e. study controls for age and one other important factor)</li> <li>b) study controls for age of the women</li> </ul>                                | <p>Either exposed and non-exposed individuals must be matched in the design and/or confounders must be adjusted for in the analysis. Statements of no differences between groups or that differences were not statistically significant are not sufficient for establishing comparability.</p>                                                                                                                                                                              |

1  
2  
3  
4  
5  
6  
7  
8  
9  
10  
11  
12  
13  
14  
15  
16  
17  
18  
19  
20  
21  
22  
23  
24  
25  
26  
27  
28  
29  
30  
31  
32  
33  
34  
35  
36  
37  
38  
39  
40  
41  
42  
43  
44  
45  
46  
47  
48  
49

|  |                                                                                                                                          |                                                                                                                                                                                                                                                                                                                                                                                                                                                                                                                                                                                                                                                                                                                                                                                                                                                                                                                                                                                                                                                                                                                                                                                                                                                                                                                                                                                                                                                                                                                                                                                      |
|--|------------------------------------------------------------------------------------------------------------------------------------------|--------------------------------------------------------------------------------------------------------------------------------------------------------------------------------------------------------------------------------------------------------------------------------------------------------------------------------------------------------------------------------------------------------------------------------------------------------------------------------------------------------------------------------------------------------------------------------------------------------------------------------------------------------------------------------------------------------------------------------------------------------------------------------------------------------------------------------------------------------------------------------------------------------------------------------------------------------------------------------------------------------------------------------------------------------------------------------------------------------------------------------------------------------------------------------------------------------------------------------------------------------------------------------------------------------------------------------------------------------------------------------------------------------------------------------------------------------------------------------------------------------------------------------------------------------------------------------------|
|  | <p>c) study controls for any other important factor</p> <p>d) study does not control for any important factor or it is not described</p> | <p>Note: If the relative risk for the exposure of interest is adjusted for the confounders listed, then the groups will be considered to be comparable on each variable used in the adjustment.</p> <p>There may be multiple ratings for this item for different categories of exposure (e.g., ever vs. never, current vs. previous or never). [A maximum of 2 stars can be allotted in this category].</p> <p><u>Note:</u><br/>The study should have initially matched the groups or presented adjusted odds ratios, AND in addition, since in our review we are analyzing each AED arm separately (instead of the whole exposed cohort), the study must also report the factor of interest <b>for ‘each AED arm’</b> (or state that <b>‘each AED arm’</b> is matched).</p> <p><b><u>Thus, there are 2 parts to this question:</u></b></p> <p>1) <u>The study should have matched/adjusted for age at whatever level of groups they were focused on (even if they aren’t our abstracted AED arms); AND</u></p> <p>2) <u>Then the study should also have reported the age for each AED arm.</u></p> <p><u>If they haven’t done both of these 2 things, it’s a ‘D’ here (unless they happen to combine these by reporting adjusted ORs for each of our AED arms).</u></p> <p>For our review, this generally pertains to <b>the comparability of the MOTHERS.</b><br/>The exception here is in studies of cognitive/psychomotor development disorders in children - when age of the children should be comparable.</p> <p>The “other important factors” here are any one of these:</p> |
|--|------------------------------------------------------------------------------------------------------------------------------------------|--------------------------------------------------------------------------------------------------------------------------------------------------------------------------------------------------------------------------------------------------------------------------------------------------------------------------------------------------------------------------------------------------------------------------------------------------------------------------------------------------------------------------------------------------------------------------------------------------------------------------------------------------------------------------------------------------------------------------------------------------------------------------------------------------------------------------------------------------------------------------------------------------------------------------------------------------------------------------------------------------------------------------------------------------------------------------------------------------------------------------------------------------------------------------------------------------------------------------------------------------------------------------------------------------------------------------------------------------------------------------------------------------------------------------------------------------------------------------------------------------------------------------------------------------------------------------------------|

|                                        |                                                                                                                                                                    |                                                                                                                                                                                                                                                                                                                                                                                                                                                                                                                                                                                                                                                                                                                                                                                                                                                                                                                                                                                                              |
|----------------------------------------|--------------------------------------------------------------------------------------------------------------------------------------------------------------------|--------------------------------------------------------------------------------------------------------------------------------------------------------------------------------------------------------------------------------------------------------------------------------------------------------------------------------------------------------------------------------------------------------------------------------------------------------------------------------------------------------------------------------------------------------------------------------------------------------------------------------------------------------------------------------------------------------------------------------------------------------------------------------------------------------------------------------------------------------------------------------------------------------------------------------------------------------------------------------------------------------------|
|                                        |                                                                                                                                                                    | <ul style="list-style-type: none"> <li>• history of congenital malformations (CMs), fetal losses, preterm deliveries or small babies.</li> <li>• family history of genetic problems or CMs.</li> <li>• alcohol use.</li> <li>• nutritional deficiencies (e.g., lack of folic acid).</li> </ul> <p><u>Example:</u><br/>- Option ‘B’ indicates that the study initially matched groups based on the women’s age (or reported adjusted ORs) AND they report the mean women’s age for EACH of our arms (e.g., for Tx1, Tx2, etc.).</p>                                                                                                                                                                                                                                                                                                                                                                                                                                                                           |
| <p><b>OUTCOME:</b></p>                 |                                                                                                                                                                    |                                                                                                                                                                                                                                                                                                                                                                                                                                                                                                                                                                                                                                                                                                                                                                                                                                                                                                                                                                                                              |
| <p><b>1) Assessment of outcome</b></p> | <ul style="list-style-type: none"> <li>a) independent OR blind assessment</li> <li>b) record linkage</li> <li>c) self-report</li> <li>d) no description</li> </ul> | <p>For some outcomes (e.g. fractured hip), reference to the medical record is sufficient to satisfy the requirement for confirmation of the fracture. This would not be adequate for vertebral fracture outcomes where reference to x-rays would be required.</p> <ul style="list-style-type: none"> <li>a) Independent or blind assessment stated in the paper, or confirmation of the outcome by reference to secure records (x-rays, medical records, etc.)</li> <li>b) Record linkage (e.g. identified through ICD codes on database records)</li> <li>c) Self-report (i.e. no reference to original medical records or x-rays to confirm the outcome)</li> <li>d) No description.</li> </ul> <p><u>Note:</u><br/>Blind (A) is if they tell us that the outcome assessors were blinded to exposures; or if the outcome is objective.</p> <p>For our purposes, we will focus on the primary outcome of interest of our systematic review, which is <u>major malformations (an objective outcome)</u>.</p> |

1  
2  
3  
4  
5  
6  
7  
8  
9  
10  
11  
12  
13  
14  
15  
16  
17  
18  
19  
20  
21  
22  
23  
24  
25  
26  
27  
28  
29  
30  
31  
32  
33  
34  
35  
36  
37  
38  
39  
40  
41  
42  
43  
44  
45  
46  
47  
48  
49

1  
2  
3  
4  
5  
6  
7  
8  
9  
10  
11  
12  
13  
14  
15  
16  
17  
18  
19  
20  
21  
22  
23  
24  
25  
26  
27  
28  
29  
30  
31  
32  
33  
34  
35  
36  
37  
38  
39  
40  
41  
42  
43  
44  
45  
46  
47  
48  
49

|                                                                  |                                                                                                                                                                                                                                                                                                      |                                                                                                                                                                                                                                                                                                                                                                                                                                                                                                                                                                                                                                                                                                                                                                                                                                                                                                                                                                                                  |
|------------------------------------------------------------------|------------------------------------------------------------------------------------------------------------------------------------------------------------------------------------------------------------------------------------------------------------------------------------------------------|--------------------------------------------------------------------------------------------------------------------------------------------------------------------------------------------------------------------------------------------------------------------------------------------------------------------------------------------------------------------------------------------------------------------------------------------------------------------------------------------------------------------------------------------------------------------------------------------------------------------------------------------------------------------------------------------------------------------------------------------------------------------------------------------------------------------------------------------------------------------------------------------------------------------------------------------------------------------------------------------------|
|                                                                  |                                                                                                                                                                                                                                                                                                      | So most of ours will be A, unless the study is only on a secondary outcome (e.g., cognitive development) and is based on the mother’s self-report of their child (e.g., not a clinical examination).                                                                                                                                                                                                                                                                                                                                                                                                                                                                                                                                                                                                                                                                                                                                                                                             |
| <p><b>2) Was follow-up long enough for outcomes to occur</b></p> | <p>a) yes<br/>b) no</p>                                                                                                                                                                                                                                                                              | <p>An acceptable length of time should be decided before quality assessment begins (e.g. 5 yrs. for exposure to breast implants)</p> <p><u>Note:</u><br/>For this component, focus only on the outcomes that are reported in the results.<br/>For our purposes, we will focus on the primary outcome of interest of our systematic review, which is <u>major malformations</u>.</p> <ul style="list-style-type: none"> <li>• For studies focusing on ‘birth’ outcomes (i.e. malformations, preterm, fetal losses, born small), the answer is ‘A’ if they follow the groups until birth.</li> <li>• For studies focusing on cognitive developmental disorders, an adequate follow-up period (i.e. child’s age) is 4 years.</li> <li>• For studies focusing on psychomotor delays, an adequate follow-up period is the earliest point of detection of the disorder.</li> <li>• For studies focusing on neonatal seizures, an adequate follow-up period (i.e. infant’s age) is 6 months.</li> </ul> |
| <p><b>3) Adequacy of follow up of cohorts</b></p>                | <p>a) complete follow up - all subjects accounted for<br/>b) subjects lost to follow up unlikely to introduce bias - small number lost (see ‘Note’), or description provided of those lost<br/>c) follow up rate is inadequate (see ‘Note’) and no description of those lost<br/>d) no statement</p> | <p>This item assesses the follow-up of the exposed and non-exposed cohorts to ensure that losses are not related to either the exposure or the outcome.</p> <p><u>Note:</u><br/><b><u>Especially check ones that start their total sample size (or figure diagram) with only the ones who had “complete” data (or only those who they had “successfully” recruited), as these are often a ‘D’ (since they don’t report on the ones NOT followed up).</u></b></p> <ul style="list-style-type: none"> <li>• For a prospective study, <math>\geq 90\%</math> follow-up rate per year is adequate (e.g., 10% dropout or less for 1 year, 20% for 2 years of follow-up, etc.). This includes missing or incomplete data, etc.</li> </ul>                                                                                                                                                                                                                                                              |

|  |  |                                                                                                                                                                                                                                                                                                                                                                                         |
|--|--|-----------------------------------------------------------------------------------------------------------------------------------------------------------------------------------------------------------------------------------------------------------------------------------------------------------------------------------------------------------------------------------------|
|  |  | <ul style="list-style-type: none"><li>• For a retrospective cohort study, <math>\geq 80\%</math> follow-up rate is adequate; including the ones that they could NOT recruit or who would NOT participate.</li><li>• For a survey/mail questionnaire, <math>\geq 75\%</math> response rate is adequate. (For a survey, a dropout rate is congruent to a survey response rate).</li></ul> |
|--|--|-----------------------------------------------------------------------------------------------------------------------------------------------------------------------------------------------------------------------------------------------------------------------------------------------------------------------------------------------------------------------------------------|

For peer review only

1  
2  
3  
4  
5  
6  
7  
8  
9  
10  
11  
12  
13  
14  
15  
16  
17  
18  
19  
20  
21  
22  
23  
24  
25  
26  
27  
28  
29  
30  
31  
32  
33  
34  
35  
36  
37  
38  
39  
40  
41  
42  
43  
44  
45  
46  
47  
48  
49

**CASE-CONTROL Studies**

| Excel Column                               | NOS* Answer Options**                                                                                                                                                           | NOS Coding Manual*                                                                                                                                                                                                                                                                                                                                                                                                                                                                                                                                        |
|--------------------------------------------|---------------------------------------------------------------------------------------------------------------------------------------------------------------------------------|-----------------------------------------------------------------------------------------------------------------------------------------------------------------------------------------------------------------------------------------------------------------------------------------------------------------------------------------------------------------------------------------------------------------------------------------------------------------------------------------------------------------------------------------------------------|
| <b>RefID</b>                               | Enter the report's RefID.                                                                                                                                                       |                                                                                                                                                                                                                                                                                                                                                                                                                                                                                                                                                           |
| <b>DA</b>                                  | Enter your initials.                                                                                                                                                            |                                                                                                                                                                                                                                                                                                                                                                                                                                                                                                                                                           |
| <b>First author</b>                        | Enter the first author's last name.                                                                                                                                             |                                                                                                                                                                                                                                                                                                                                                                                                                                                                                                                                                           |
| <b>Year of publication</b>                 | Enter the year of the publication.                                                                                                                                              |                                                                                                                                                                                                                                                                                                                                                                                                                                                                                                                                                           |
| <b>SELECTION:</b>                          |                                                                                                                                                                                 |                                                                                                                                                                                                                                                                                                                                                                                                                                                                                                                                                           |
| <b>1) Is the case definition adequate?</b> | <ul style="list-style-type: none"> <li>a) yes, with independent validation</li> <li>b) yes, e.g., record linkage or based on self-reports</li> <li>c) no description</li> </ul> | <ul style="list-style-type: none"> <li>a) Requires some independent validation (e.g. &gt;1 person/record/time/process to extract information, or reference to primary record source such as x-rays or medical/hospital records)</li> <li>b) Record linkage (e.g. ICD codes in database) or self-report with no reference to primary record</li> <li>c) No description</li> </ul> <p><u>Note:</u><br/>This question is assessing the group of infants that have the outcome of interest (e.g., CMs) – i.e. the “cases” in a case-control study design.</p> |
| <b>2) Representativeness of the cases</b>  | <ul style="list-style-type: none"> <li>a) consecutive or obviously representative series of cases</li> <li>b) potential for selection biases, or not stated</li> </ul>          | <ul style="list-style-type: none"> <li>a) All eligible cases with outcome of interest over a defined period of time, all cases in a defined catchment area, all cases in a defined hospital or clinic, group of hospitals, health maintenance organisation, or an appropriate sample of those cases (e.g. random sample)</li> <li>b) Not satisfying requirements in part (a), or not stated.</li> </ul> <p><u>Note:</u><br/>Option ‘A’ is a population-based sample.</p>                                                                                  |
| <b>3) Selection of controls</b>            | <ul style="list-style-type: none"> <li>a) community controls</li> <li>b) hospital controls</li> <li>c) no description</li> </ul>                                                | <p>This item assesses whether the control series used in the study is derived from the same population as the cases and essentially would have been cases had the outcome been present.</p>                                                                                                                                                                                                                                                                                                                                                               |

|                                                                                             |                                                                                                                                                                                                                                                                                        |                                                                                                                                                                                                                                                                                                                                                                                                                                                                                                                                                                                                                                                |
|---------------------------------------------------------------------------------------------|----------------------------------------------------------------------------------------------------------------------------------------------------------------------------------------------------------------------------------------------------------------------------------------|------------------------------------------------------------------------------------------------------------------------------------------------------------------------------------------------------------------------------------------------------------------------------------------------------------------------------------------------------------------------------------------------------------------------------------------------------------------------------------------------------------------------------------------------------------------------------------------------------------------------------------------------|
|                                                                                             |                                                                                                                                                                                                                                                                                        | <p>a) Community controls (i.e. same community as cases and would be cases if had outcome)</p> <p>b) Hospital controls, within same community as cases (i.e. not another city) but derived from a hospitalised population</p> <p>c) No description</p> <p><u>Note:</u><br/>This question is assessing the group of infants that don't have the outcome (e.g., CMs) – i.e. the “controls” in a case-control study design.</p> <p>Community controls (A) includes a population-based sample.</p>                                                                                                                                                  |
| <p><b>4) Definition of controls</b></p>                                                     | <p>a) no history of disease (endpoint)</p> <p>b) no description of source</p>                                                                                                                                                                                                          | <p>a) If cases are first occurrence of outcome, then it must explicitly state that controls have no history of this outcome. If cases have new (not necessarily first) occurrence of outcome, then controls with previous occurrences of outcome of interest should not be excluded.</p> <p>b) No mention of history of outcome</p> <p><u>Note:</u><br/>Since our review is on fetal effects, this question is ‘A’ for all studies.<br/><b>Please email us if a study involves exposure during breastfeeding.</b></p>                                                                                                                          |
| <p><b>COMPARABILITY:</b></p>                                                                |                                                                                                                                                                                                                                                                                        |                                                                                                                                                                                                                                                                                                                                                                                                                                                                                                                                                                                                                                                |
| <p><b>1) Comparability of cases and controls on the basis of the design or analysis</b></p> | <p>a) answer is BOTH B &amp; C (i.e. study controls for age and one other important factor)</p> <p>b) study controls for age of the women</p> <p>c) study controls for any other important factor</p> <p>d) study does not control for any important factor or it is not described</p> | <p>Either cases and controls must be matched in the design and/or confounders must be adjusted for in the analysis. Statements of no differences between groups or that differences were not statistically significant are not sufficient for establishing comparability.</p> <p><u>Note:</u> If the odds ratio for the exposure of interest is adjusted for the confounders listed, then the groups will be considered to be comparable on each variable used in the adjustment.</p> <p>There may be multiple ratings for this item for different categories of exposure (e.g. ever vs. never, current vs. previous or never). [A maximum</p> |

1  
2  
3  
4  
5  
6  
7  
8  
9  
10  
11  
12  
13  
14  
15  
16  
17  
18  
19  
20  
21  
22  
23  
24  
25  
26  
27  
28  
29  
30  
31  
32  
33  
34  
35  
36  
37  
38  
39  
40  
41  
42  
43  
44  
45  
46  
47  
48  
49

|  |  |                                                                                                                                                                                                                                                                                                                                                                                                                                                                                                                                                                                                                                                                                                                                                                                                                                                                                                                                                                                                                                                                                                                                                                                                               |
|--|--|---------------------------------------------------------------------------------------------------------------------------------------------------------------------------------------------------------------------------------------------------------------------------------------------------------------------------------------------------------------------------------------------------------------------------------------------------------------------------------------------------------------------------------------------------------------------------------------------------------------------------------------------------------------------------------------------------------------------------------------------------------------------------------------------------------------------------------------------------------------------------------------------------------------------------------------------------------------------------------------------------------------------------------------------------------------------------------------------------------------------------------------------------------------------------------------------------------------|
|  |  | <p>of 2 stars can be allotted in this category].</p> <p><u>Note:</u><br/>The study should have initially matched the groups, AND in addition, since in our review we are analyzing each AED arm separately (instead of the whole cases group), the study must also report the factor of interest <b>for ‘each AED arm’</b> (or state that <b>‘each AED arm’</b> is matched).</p> <p>For our review, this generally pertains to <b>the comparability of the MOTHERS of the cases and controls.</b><br/>The exception here is in studies of cognitive/psychomotor development disorders in children - when age of the children should be comparable.</p> <p>The “other important factors” here are any one of these:</p> <ul style="list-style-type: none"> <li>• history of congenital malformations (CMs), fetal losses, preterm deliveries or small babies.</li> <li>• family history of genetic problems or CMs.</li> <li>• alcohol use.</li> <li>• nutritional deficiencies (e.g., lack of folic acid).</li> </ul> <p>For example, Option ‘B’ indicates that the study initially matched groups based on the women’s age AND they report the mean women’s age for EACH arm (e.g., for Tx1, Tx2, etc.).</p> |
|--|--|---------------------------------------------------------------------------------------------------------------------------------------------------------------------------------------------------------------------------------------------------------------------------------------------------------------------------------------------------------------------------------------------------------------------------------------------------------------------------------------------------------------------------------------------------------------------------------------------------------------------------------------------------------------------------------------------------------------------------------------------------------------------------------------------------------------------------------------------------------------------------------------------------------------------------------------------------------------------------------------------------------------------------------------------------------------------------------------------------------------------------------------------------------------------------------------------------------------|

**EXPOSURE:**

|                                         |                                                                                                                                                                                                                    |                                                                                                                                                                                                                                                                                                                                                                       |
|-----------------------------------------|--------------------------------------------------------------------------------------------------------------------------------------------------------------------------------------------------------------------|-----------------------------------------------------------------------------------------------------------------------------------------------------------------------------------------------------------------------------------------------------------------------------------------------------------------------------------------------------------------------|
| <p><b>1) Assessment of exposure</b></p> | <p>a) secure record (e.g., surgical records)</p> <p>b) structured interview where blind to case/control status</p> <p>c) interview not blinded to case/control status</p> <p>d) written self-report or medical</p> | <p><u>Note:</u><br/>Option ‘A’ includes patient hospital records, prescription drug database, or hospital/clinic visits (e.g., patient is asked about “current” AED use during a visit with their doctor).</p> <p>“Interview” here includes a hospital/clinic visit, but the patients are asked to remember their AED use during pregnancy (e.g., retrospectively</p> |
|-----------------------------------------|--------------------------------------------------------------------------------------------------------------------------------------------------------------------------------------------------------------------|-----------------------------------------------------------------------------------------------------------------------------------------------------------------------------------------------------------------------------------------------------------------------------------------------------------------------------------------------------------------------|



|                                                               |                                                                                                      |                                                                                                                                                                                                                                                                                                                                                                                                                 |
|---------------------------------------------------------------|------------------------------------------------------------------------------------------------------|-----------------------------------------------------------------------------------------------------------------------------------------------------------------------------------------------------------------------------------------------------------------------------------------------------------------------------------------------------------------------------------------------------------------|
|                                                               | record only<br>e) no description                                                                     | ascertained exposure).                                                                                                                                                                                                                                                                                                                                                                                          |
| <b>2) Same method of ascertainment for cases and controls</b> | a) yes<br>b) no                                                                                      | <u>Note:</u><br>This question is asking whether the method of <u>ascertainment of exposure</u> was the same for ‘cases’ (with the outcome) and ‘controls’ (without the outcome; in this case-control study design).                                                                                                                                                                                             |
| <b>3) Non-response rate</b>                                   | a) same rate for both groups<br>b) non-respondents described<br>c) rate different and no designation | <u>Note:</u><br>For our review, this pertains to either the infants or the mothers of the case and control groups.<br><br>We’re allowing 10% dropout per year for a prospective study – e.g., 10% for 1 year, 20% for 2 years of follow-up, etc.<br><br>For a survey, we allow for a 75% response rate in order for it be adequate.<br><br>For a survey, a dropout rate is congruent to a survey response rate. |

\*Wells GA, Shea B, O'Connell D, Peterson J, Welch V, Losos M, Tugwell P. The Newcastle-Ottawa Scale (NOS) for assessing the quality of nonrandomised studies in meta-analyses. Available at: [http://www.ohri.ca/programs/clinical\\_epidemiology/oxford.asp](http://www.ohri.ca/programs/clinical_epidemiology/oxford.asp)

\*\*In the “**NOS Coding Manual**” column, the first section for each item is copied straight from the NOS documentation while the lower portions in each item are our “Notes” tailored for the AED review.

## Appendix D. List of included studies

1. Adab N, Kini U, Vinten J, et al. The longer term outcome of children born to mothers with epilepsy. *J Neurol Neurosurg Psychiatry*. 2004;75(11):1575-83.
2. Vinten J, Bromley RL, Taylor J, Adab N, Kini U, Baker GA. The behavioral consequences of exposure to antiepileptic drugs in utero. *Epilepsy Behav*. 2009;14(1):197-201.
3. Mawer G, Clayton-Smith J, Coyle H, Kini U. Outcome of pregnancy in women attending an outpatient epilepsy clinic: adverse features associated with higher doses of sodium valproate. *Seizure*. 2002;11(8):512-8.
4. Arkilo D, Hanna J, Dickens D, et al. Pregnancy and neurodevelopmental outcomes with in-utero antiepileptic agent exposure. A pilot study. *Eur J Paediatr Neurol*. 2015;19(1):37-40.
5. Bromley R, Baxter N, Calderbank R, Mawer G, Clayton-Smith J, Baker G. A comprehensive review of the language abilities of children exposed to valproate or carbamazepine in utero. American Epilepsy Society; Texas2010.
6. Bromley RL, Mawer GE, Briggs M, et al. The prevalence of neurodevelopmental disorders in children prenatally exposed to antiepileptic drugs. *J Neurol Neurosurg Psychiatry*. 2013;84(6):637-43.
7. Bromley RL, Mawer G, Clayton-Smith J, Baker GA. Autism spectrum disorders following in utero exposure to antiepileptic drugs. *Neurology*. 2008;71(23):1923-4.
8. Christensen J, Gronborg TK, Sorensen MJ, et al. Prenatal valproate exposure and risk of autism spectrum disorders and childhood autism. *JAMA*. 2013;309(16):1696-703.
9. Cohen MJ, Meador KJ, Browning N, et al. Fetal antiepileptic drug exposure: Adaptive and emotional/behavioral functioning at age 6 years. *Epilepsy Behav*. 2013;29(2):308-15.
10. Cummings C, Stewart M, Stevenson M, Morrow J, Nelson J. Neurodevelopment of children exposed in utero to lamotrigine, sodium valproate and carbamazepine. *Arch Dis Child*. 2011;96(7):643-7.
11. Tomson T, Battino D, Bonizzoni E, et al. Antiepileptic drugs and intrauterine death: A prospective observational study from EURAP. *Neurology*. 2015;85(7):580-8.
12. Dean JCS, Hailey H, Moore SJ, Lloyd DJ, Turnpenny PD, Little J. Long term health and neurodevelopment in children exposed to antiepileptic drugs before birth. *J Med Genet*. 2002;39(4):251-9.
13. Rasalam AD, Hailey H, Williams JH, et al. Characteristics of fetal anticonvulsant syndrome associated autistic disorder. *Dev Med Child Neurol*. 2005;47(8):551-5.
14. D'Souza SW, Robertson IG, Donnai D, Mawer G. Fetal phenytoin exposure, hypoplastic nails, and jitteriness. *Arch Dis Child*. 1991;66(3):320-4.
15. Eriksson K, Viinikainen K, Mönkkönen A, et al. Children exposed to valproate in utero—Population based evaluation of risks and confounding factors for long-term neurocognitive development. *Epilepsy Res*. 2005;65(3):189-200.
16. Viinikainen K, Eriksson K, Monkkonen A, et al. The effects of valproate exposure in utero on behavior and the need for educational support in school-aged children. *Epilepsy Behav*. 2006;9(4):636-40.
17. Gaily E. Development and growth in children of epileptic mothers: a prospective controlled study. Helsinki, Finland: University of Helsinki; 1990.
18. Gaily EK, Granstrom ML, Hiilesmaa VK, Bardy AH. Head circumference in children of epileptic mothers: contributions of drug exposure and genetic background. *Epilepsy Res*. 1990;5(3):217-22.
19. Hiilesmaa V. A prospective study on maternal and fetal outcome in 139 women with epilepsy. Helsinki: University of Helsinki; 1982.
20. Hiilesmaa VK, Bardy A, Teramo K. Obstetric outcome in women with epilepsy. *Am J Obstet Gynecol*. 1985;152(5):499-504.
21. Gogatishvili N, Ediberidze T, Lomidze G, Tatishvili N, Kasradze S. PO-0834 Long-term Developmental Outcome Of Children Prenatally Exposed To Antiepileptic Drugs. *Arch Dis Child*. 2014;99(Suppl 2):A526.
22. Gogatishvili N, Ediberidze T, Lomidze G, Tatishvili N, Kasradze S. Cognitive outcomes of children with fetal antiepileptic drug exposure at the age of 3-6 years-preliminary data. 1st Congress of the European Academy of Neurology; Berlin: European Journal of Neurology; 2015. p. 329.
23. Jones KL, Lacro RV, Johnson KA, Adams J. Pattern of malformations in the children of women treated with carbamazepine during pregnancy. *N Engl J Med*. 1989;320(25):1661-6.

- 1
- 2
- 3
- 4 24. Katz JM, Pacia SV, Devinsky O. Current Management of Epilepsy and Pregnancy: Fetal
- 5 Outcome, Congenital Malformations, and Developmental Delay. *Epilepsy Behav.* 2001;2(2):119-23.
- 6 25. Koch S, Jager-Roman E, Losche G, Nau H, Rating D, Helge H. Antiepileptic drug treatment in
- 7 pregnancy: drug side effects in the neonate and neurological outcome. *Acta Paediatr.* 1996;85(6):739-46.
- 8 26. Lacroix I, Hurault-Delarue C, Guitard C, et al. Psychomotor effects of in utero exposure to
- 9 psychotropic medications: A comparative study in EFEMERIS database. Congrès de Physiologie
- 10 Pharmacologie et Thérapeutique; Dijon, France2012.
- 11 27. Miskov S, Juraski RG, Fucic A, et al. Croatian Pregnant Women with Epilepsy and Effects of
- 12 Antiepileptic Drugs Exposure in their Offspring - seven years of prospective surveillance. American
- 13 Epilepsy Society; Texas2010.
- 14 28. Nadebaum C, Anderson VA, Vajda F, Reutens DC, Barton S, Wood AG. Language skills of
- 15 school-aged children prenatally exposed to antiepileptic drugs. *Neurology.* 2011;76(8):719-26.
- 16 29. Rihtman T, Parush S, Ornoy A. Developmental outcomes at preschool age after fetal exposure to
- 17 valproic acid and lamotrigine: cognitive, motor, sensory and behavioral function. *Reprod Toxicol.*
- 18 2013;41:115-25.
- 19 30. Scolnik D, Nulman I, Rovet J, et al. Neurodevelopment of children exposed in utero to phenytoin
- 20 and carbamazepine monotherapy. *JAMA.* 1994;271(10):767-70.
- 21 31. Shankaran S, Woldt E, Nelson J, Bedard M, Delaney-Black V. Antenatal phenobarbital therapy
- 22 and neonatal outcome. II: Neurodevelopmental outcome at 36 months. *Pediatrics.* 1996;97(5):649-52.
- 23 32. van der Pol MC, Hadders-Algra M, Huisjes HJ, Touwen BC. Antiepileptic medication in
- 24 pregnancy: late effects on the children's central nervous system development. *Am J Obstet Gynecol.*
- 25 1991;164(1 Pt 1):121-8.
- 26 33. Veiby G, Engelsen BA, Gilhus NE. Early child development and exposure to antiepileptic drugs
- 27 prenatally and through breastfeeding: a prospective cohort study on children of women with epilepsy.
- 28 *JAMA neurology.* 2013;70(11):1367-74.
- 29 34. Veiby G, Daltveit AK, Schjolberg S, et al. Exposure to antiepileptic drugs in utero and child
- 30 development: a prospective population-based study. *Epilepsia.* 2013;54(8):1462-72.
- 31 35. Wood AG, Nadebaum C, Anderson V, et al. Prospective assessment of autism traits in children
- 32 exposed to antiepileptic drugs during pregnancy. *Epilepsia.* 2015;56(7):1047-55.
- 33
- 34
- 35
- 36
- 37
- 38
- 39
- 40
- 41
- 42
- 43
- 44
- 45
- 46
- 47
- 48
- 49
- 50
- 51
- 52
- 53
- 54
- 55
- 56
- 57
- 58
- 59
- 60

## Appendix E. Additional information on search results

Of the included 110 studies, nine were written in languages other than English and three were conference abstracts or letter to the editor with usable data. Scanning of reference lists of included articles and related reviews identified 13 additional studies. Forty-eight percent of contacted authors (22/46) provided clarification or additional data. Additionally, 29% (13/45) of authors of conference abstracts provided additional unpublished data. We were unable to contact 11 authors due to non-working email addresses. One author provided a manuscript and three authors provided unpublished data that were included in the analysis.

For peer review only

## Appendix F. Key excluded studies

| Author, Year                  | Research Group                                                                             | Title                                                                                                                   | Reason for Exclusion                           |
|-------------------------------|--------------------------------------------------------------------------------------------|-------------------------------------------------------------------------------------------------------------------------|------------------------------------------------|
| Meador, 2009 <sup>1</sup>     | Neurodevelopmental Effects of Antiepileptic Drug (NEAD) Study Group                        | Cognitive Function at 3 Years of Age after Fetal Exposure to Antiepileptic Drugs                                        | Outcomes only reported as continuous variables |
| Meador, 2010 <sup>2</sup>     | Neurodevelopmental Effects of Antiepileptic Drug (NEAD) Study Group                        | Effects of breastfeeding in children of women taking antiepileptic drugs                                                | Outcomes only reported as continuous variables |
| Meador, 2011 <sup>3</sup>     | Neurodevelopmental Effects of Antiepileptic Drug (NEAD) Study Group                        | Foetal antiepileptic drug exposure and verbal versus non-verbal abilities at three years of age                         | Outcomes only reported as continuous variables |
| Meador, 2012 <sup>4</sup>     | Neurodevelopmental Effects of Antiepileptic Drug (NEAD) Study Group                        | Effects of fetal antiepileptic drug exposure: Outcomes at age 4.5 years                                                 | Outcomes only reported as continuous variables |
| Meador, 2013 <sup>5</sup>     | Neurodevelopmental Effects of Antiepileptic Drug (NEAD) Study Group                        | Fetal antiepileptic drug exposure and cognitive outcomes at age 6 years (NEAD study): a prospective observational study | Outcomes only reported as continuous variables |
| Shallcross, 2011 <sup>6</sup> | Liverpool and Manchester Neurodevelopment Group and The UK Epilepsy and Pregnancy Register | Child development following in utero exposure: Levetiracetam vs. sodium valproate                                       | Outcomes only reported as continuous variables |
| Shallcross, 2014 <sup>7</sup> | Liverpool and Manchester                                                                   | In utero exposure to levetiracetam vs. valproate: Development and language at 3 years of age                            | Outcomes only reported as continuous variables |

|  |                                                                   |  |  |
|--|-------------------------------------------------------------------|--|--|
|  | Neurodevelopment Group and The UK Epilepsy and Pregnancy Register |  |  |
|--|-------------------------------------------------------------------|--|--|

References

1. Meador KJ, Baker GA, Browning N, et al. Cognitive function at 3 years of age after fetal exposure to antiepileptic drugs. *N Engl J Med*. 2009;360(16):1597-605.
2. Meador KJ, Baker GA, Browning N, et al. Effects of breastfeeding in children of women taking antiepileptic drugs. *Neurology*. 2010;75(22):1954-60.
3. Meador KJ, Baker GA, Browning N, et al. Foetal antiepileptic drug exposure and verbal versus non-verbal abilities at three years of age. *Brain*. 2011;134(Pt 2):396-404.
4. Meador KJ, Baker GA, Browning N, et al. Effects of fetal antiepileptic drug exposure: outcomes at age 4.5 years. *Neurology*. 2012;78(16):1207-14.
5. Meador KJ, Baker GA, Browning N, et al. Fetal antiepileptic drug exposure and cognitive outcomes at age 6 years (NEAD study): a prospective observational study. *Lancet Neurol*. 2013;12(3):244-52.
6. Shallcross R, Bromley RL, Irwin B, Bonnett LJ, Morrow J, Baker GA. Child development following in utero exposure: levetiracetam vs sodium valproate. *Neurology*. 2011;76(4):383-9.
7. Shallcross R, Bromley RL, Cheyne CP, et al. In utero exposure to levetiracetam vs valproate: development and language at 3 years of age. *Neurology*. 2014;82(3):213-21.

1  
2  
3  
4  
5  
6  
7  
8  
9  
10  
11  
12  
13  
14  
15  
16  
17  
18  
19  
20  
21  
22  
23  
24  
25  
26  
27  
28  
29  
30  
31  
32  
33  
34  
35  
36  
37  
38  
39  
40  
41  
42  
43  
44  
45  
46  
47  
48  
49

## Appendix G. Table of Individual Study characteristics

| Author, Year                                                                          | Country of conduct | Registry or Setting                                                                                                                                           | Study period | Interventions                        | Outcomes                                                       | Funding                |
|---------------------------------------------------------------------------------------|--------------------|---------------------------------------------------------------------------------------------------------------------------------------------------------------|--------------|--------------------------------------|----------------------------------------------------------------|------------------------|
| Adab, 2004 <sup>1</sup><br>[CR: Vinten, 2009 <sup>2</sup> ; Mawer, 2002 <sup>3*</sup> | UK                 | Mersey Regional Epilepsy Clinic; Epilepsy Clinic at the Manchester Royal Infirmary; Antenatal clinic at St Mary's Hospital, Manchester                        | 2000-2001    | Carbam, Control, Valpro              | Cognitive Developmental Delay, Psychomotor Developmental Delay | NR                     |
| Arkilo, 2015 <sup>4</sup>                                                             | USA                | Minnesota Epilepsy Group                                                                                                                                      | 2006-2011    | Carbam, Lamot, Levet, Pheny, Valpro  | Autism/Dyspraxia, Psychomotor Developmental Delay              | NR                     |
| Bromley, 2010 <sup>5</sup>                                                            | UK                 | Liverpool and Manchester Neurodevelopment Group                                                                                                               | NR           | Carbam, Valpro                       | Language Delay                                                 | NR                     |
| Bromley, 2013 <sup>6</sup> [CR: Bromley, 2008 <sup>7</sup> ]                          | UK                 | Liverpool and Manchester Neurodevelopment group                                                                                                               | 2000-2004    | Carbam, Control, Lamot, Valpro       | Autism/Dyspraxia, ADHD                                         | mixed public & private |
| Christensen, 2013 <sup>8†</sup>                                                       | Denmark            | Danish Civil Registration System; Danish Prescription Register; Danish Psychiatric Central Register; Danish Birth Register; Danish National Hospital Register | 1996-2006    | Carbam, Clonaz, Lamot, Oxcar, Valpro | Autism/Dyspraxia                                               | public                 |

|    |                                                                                                                                              |                     |                                                                                                         |               |                                                                                                                                                 |                                                                               |                              |
|----|----------------------------------------------------------------------------------------------------------------------------------------------|---------------------|---------------------------------------------------------------------------------------------------------|---------------|-------------------------------------------------------------------------------------------------------------------------------------------------|-------------------------------------------------------------------------------|------------------------------|
| 1  |                                                                                                                                              |                     |                                                                                                         |               |                                                                                                                                                 |                                                                               |                              |
| 2  |                                                                                                                                              |                     |                                                                                                         |               |                                                                                                                                                 |                                                                               |                              |
| 3  |                                                                                                                                              |                     |                                                                                                         |               |                                                                                                                                                 |                                                                               |                              |
| 4  | Cohen, 2013 <sup>9</sup>                                                                                                                     | USA;UK              | Neurodevelopmental<br>Effects of Antiepileptic<br>Drugs Study Group                                     | 1999-<br>2004 | Carbam, Lamot, Pheny,<br>Valpro,                                                                                                                | ADHD                                                                          | public                       |
| 5  |                                                                                                                                              |                     |                                                                                                         |               |                                                                                                                                                 |                                                                               |                              |
| 6  |                                                                                                                                              |                     |                                                                                                         |               |                                                                                                                                                 |                                                                               |                              |
| 7  | Cummings,<br>2011 <sup>10</sup> † [CR:<br>Tomson,<br>2015 <sup>11</sup> ]                                                                    | Northern<br>Ireland | UK Epilepsy and<br>Pregnancy Register<br>(Northern Ireland);<br>Northern Ireland Child<br>Health System | 1996-<br>2005 | Carbam, Lamot, Valpro,                                                                                                                          | Cognitive<br>Developmental<br>Delay                                           | public                       |
| 8  |                                                                                                                                              |                     |                                                                                                         |               |                                                                                                                                                 |                                                                               |                              |
| 9  |                                                                                                                                              |                     |                                                                                                         |               |                                                                                                                                                 |                                                                               |                              |
| 10 |                                                                                                                                              |                     |                                                                                                         |               |                                                                                                                                                 |                                                                               |                              |
| 11 |                                                                                                                                              |                     |                                                                                                         |               |                                                                                                                                                 |                                                                               |                              |
| 12 |                                                                                                                                              |                     |                                                                                                         |               |                                                                                                                                                 |                                                                               |                              |
| 13 |                                                                                                                                              |                     |                                                                                                         |               |                                                                                                                                                 |                                                                               |                              |
| 14 |                                                                                                                                              |                     |                                                                                                         |               |                                                                                                                                                 |                                                                               |                              |
| 15 | Dean, 2002 <sup>12</sup><br>[CR: Rasalam,<br>2005 <sup>13</sup> ]                                                                            | Scotland            | Aberdeen Maternity<br>Hospital                                                                          | 1976-<br>2000 | Carbam, Carbam+Pheno,<br>Carbam+Pheny,<br>Carbam+Valpro, Control,<br>Ethos, Pheno, Pheno+Pheny,<br>Pheno+Valpro, Pheny,<br>Primid, Valpro       | Psychomotor<br>Developmental<br>Delay,<br>ADHD                                | NR                           |
| 16 |                                                                                                                                              |                     |                                                                                                         |               |                                                                                                                                                 |                                                                               |                              |
| 17 |                                                                                                                                              |                     |                                                                                                         |               |                                                                                                                                                 |                                                                               |                              |
| 18 |                                                                                                                                              |                     |                                                                                                         |               |                                                                                                                                                 |                                                                               |                              |
| 19 |                                                                                                                                              |                     |                                                                                                         |               |                                                                                                                                                 |                                                                               |                              |
| 20 |                                                                                                                                              |                     |                                                                                                         |               |                                                                                                                                                 |                                                                               |                              |
| 21 |                                                                                                                                              |                     |                                                                                                         |               |                                                                                                                                                 |                                                                               |                              |
| 22 | D'Souza,<br>1991 <sup>14</sup>                                                                                                               | United<br>Kingdom   | St Mary's Hospital                                                                                      | 1980-<br>1982 | Carbam, Control, Pheno,<br>Pheny, Valpro                                                                                                        | Cognitive<br>Developmental<br>Delay                                           | public                       |
| 23 |                                                                                                                                              |                     |                                                                                                         |               |                                                                                                                                                 |                                                                               |                              |
| 24 |                                                                                                                                              |                     |                                                                                                         |               |                                                                                                                                                 |                                                                               |                              |
| 25 |                                                                                                                                              |                     |                                                                                                         |               |                                                                                                                                                 |                                                                               |                              |
| 26 | Eriksson,<br>2005 <sup>15</sup> † [CR:<br>Viinikainen,<br>2006 <sup>16</sup> ]                                                               | Finland             | Kuopio University<br>Hospital                                                                           | 1989-<br>2000 | Carbam, Control, Valpro                                                                                                                         | Cognitive<br>Developmental<br>Delay, Psychomotor<br>Developmental<br>Delay    | public                       |
| 27 |                                                                                                                                              |                     |                                                                                                         |               |                                                                                                                                                 |                                                                               |                              |
| 28 |                                                                                                                                              |                     |                                                                                                         |               |                                                                                                                                                 |                                                                               |                              |
| 29 |                                                                                                                                              |                     |                                                                                                         |               |                                                                                                                                                 |                                                                               |                              |
| 30 |                                                                                                                                              |                     |                                                                                                         |               |                                                                                                                                                 |                                                                               |                              |
| 31 |                                                                                                                                              |                     |                                                                                                         |               |                                                                                                                                                 |                                                                               |                              |
| 32 | Gaily, 1990 <sup>17</sup><br>[CR: Gaily,<br>1990 <sup>18</sup> ;<br>Hiilesmaa,<br>1982 <sup>19</sup> ;<br>Hiilesmaa,<br>1985 <sup>20</sup> ] | Finland             | Helsinki University<br>Central Hospital                                                                 | 1975-<br>1979 | Carbam,<br>Carbam+Pheno+Pheny,<br>Carbam+Pheny,<br>Carbam+Valpro, Control,<br>Ethos+Pheny, Pheno+Pheny,<br>Pheny, Pheny+Primid,<br>Pheny+Valpro | Cognitive<br>Developmental<br>Delay,<br>Psychomotor<br>Developmental<br>Delay | mixed<br>public &<br>private |
| 33 |                                                                                                                                              |                     |                                                                                                         |               |                                                                                                                                                 |                                                                               |                              |
| 34 |                                                                                                                                              |                     |                                                                                                         |               |                                                                                                                                                 |                                                                               |                              |
| 35 |                                                                                                                                              |                     |                                                                                                         |               |                                                                                                                                                 |                                                                               |                              |
| 36 |                                                                                                                                              |                     |                                                                                                         |               |                                                                                                                                                 |                                                                               |                              |
| 37 |                                                                                                                                              |                     |                                                                                                         |               |                                                                                                                                                 |                                                                               |                              |
| 38 |                                                                                                                                              |                     |                                                                                                         |               |                                                                                                                                                 |                                                                               |                              |
| 39 |                                                                                                                                              |                     |                                                                                                         |               |                                                                                                                                                 |                                                                               |                              |
| 40 |                                                                                                                                              |                     |                                                                                                         |               |                                                                                                                                                 |                                                                               |                              |
| 41 | Gogatishvili,<br>2014 <sup>21</sup>                                                                                                          | Georgia             | Georgian National AED-<br>Pregnancy Registry                                                            | NR            | Carbam, Lamot, Valpro                                                                                                                           | Cognitive<br>Developmental                                                    | public                       |
| 42 |                                                                                                                                              |                     |                                                                                                         |               |                                                                                                                                                 |                                                                               |                              |
| 43 |                                                                                                                                              |                     |                                                                                                         |               |                                                                                                                                                 |                                                                               |                              |
| 44 |                                                                                                                                              |                     |                                                                                                         |               |                                                                                                                                                 |                                                                               |                              |
| 45 |                                                                                                                                              |                     |                                                                                                         |               |                                                                                                                                                 |                                                                               |                              |
| 46 |                                                                                                                                              |                     |                                                                                                         |               |                                                                                                                                                 |                                                                               |                              |
| 47 |                                                                                                                                              |                     |                                                                                                         |               |                                                                                                                                                 |                                                                               |                              |
| 48 |                                                                                                                                              |                     |                                                                                                         |               |                                                                                                                                                 |                                                                               |                              |
| 49 |                                                                                                                                              |                     |                                                                                                         |               |                                                                                                                                                 |                                                                               |                              |



|                                  |         |                                                                                                                                                  |           |                                                            |                                                                 | Delay  |  |
|----------------------------------|---------|--------------------------------------------------------------------------------------------------------------------------------------------------|-----------|------------------------------------------------------------|-----------------------------------------------------------------|--------|--|
| Gogatishvili, 2015 <sup>22</sup> | Georgia | Georgian National AED-Pregnancy Registry                                                                                                         | NR        | Carbam, Carbam+Levet, Lamot, Pheno, Valpro                 | Language Delay                                                  | public |  |
| Jones, 1989 <sup>23</sup> †      | US      | California Teratogen Registry                                                                                                                    | 1979-1988 | Carbam, Carbam+Pheno, Carbam+Pheno+Valpro, Carbam+Primid   | Cognitive Developmental Delay , Psychomotor Developmental Delay | public |  |
| Katz, 2001 <sup>24</sup>         | USA     | Mount Sinai Comprehensive Epilepsy Center                                                                                                        | 1990-2000 | Carbam, Control, Lamot, Pheno, Pheny, Primid, Valpro       | Cognitive Developmental Delay                                   | NR     |  |
| Koch, 1996 <sup>25</sup>         | Germany | NR                                                                                                                                               | 1976-1983 | Pheno, Pheny, Primid, Valpro                               | Cognitive Developmental Delay                                   | public |  |
| Lacroix, 2012 <sup>26</sup>      | France  | EFEMERIS database - Caisse Primaire d'Assurance Maladie of Haute-Garonne and Maternal and Infant Protection Service; Antenatal Diagnostic Centre | 2004-2008 | Carbam, Clobaz, Clonaz, Gabap, Lamot, Pheno, Topir, Valpro | Psychomotor Developmental Delay                                 | NR     |  |
| Mawer, 2002 <sup>3</sup>         | England | Manchester Royal Infirmary                                                                                                                       | 1990-1999 | Carbam, Lamot, Pheny, Valpro                               | Cognitive Developmental Delay                                   | NR     |  |

|                                    |             |                                                                                                                                       |               |                                          |                                                             |                              |
|------------------------------------|-------------|---------------------------------------------------------------------------------------------------------------------------------------|---------------|------------------------------------------|-------------------------------------------------------------|------------------------------|
| Miskov,<br>2010 <sup>27</sup>      | Croatia     | NR                                                                                                                                    | 2003-<br>2010 | Carbam, Control, Gabap,<br>Lamot, Valpro | Psychomotor<br>Developmental<br>Delay, Neonatal<br>Seizures | NR                           |
| Nadebaum,<br>2011 <sup>28,†</sup>  | Australia   | Australian Registry of<br>Antiepileptic Drug Use in<br>Pregnancy                                                                      | 2007-<br>2009 | Carbam, Lamot, Valpro                    | Language Delay                                              | mixed<br>public &<br>private |
| Rihtman,<br>2013 <sup>29</sup>     | Israel      | Israeli Teratogen<br>Information Service                                                                                              | NR            | Lamot, Valpro                            | Neonatal Seizure                                            | mixed<br>public &<br>private |
| Scolnik,<br>1994 <sup>30</sup>     | Canada      | Hospital for Sick Children<br>- Motherisk Program;<br>North York General<br>Hospital; Toronto<br>Hospital;<br>Oshawa General Hospital | 1987-<br>1992 | Carbam, Pheny                            | Cognitive<br>Developmental<br>Delay                         | public                       |
| Shankaran,<br>1996 <sup>31</sup>   | USA         | Children's Hospital of<br>Michigan                                                                                                    | NR            | Control, PHENO,                          | Psychomotor<br>Developmental<br>Delay, Language<br>Delay    | public                       |
| Van der Pol,<br>1991 <sup>32</sup> | Netherlands | Groningen University<br>Hospital                                                                                                      | 1973-<br>1981 | Carbam, Carbam+Pheno,<br>Control, Pheno  | Psychomotor<br>Developmental<br>Delay                       | public                       |
| Veiby,<br>2013a <sup>33,†</sup>    | Norway      | Norwegian Institute of<br>Public Health- Mother<br>and Child Cohort Study                                                             | 1999-<br>2009 | Carbam, Control, Lamot,<br>Valpro        | Social Impairment                                           | public                       |
| Veiby,<br>2013b <sup>34,†</sup>    | Norway      | Medical Birth Registry of<br>Norway                                                                                                   | 1999-<br>2008 | Carbam, Control, Lamot,<br>Valpro        | Psychomotor<br>Developmental<br>Delay,<br>Autism/Dyspraxia, | public                       |

---

Language Delay,  
ADHD

---

|                            |           |                                                            |           |                                                                         |                  |        |
|----------------------------|-----------|------------------------------------------------------------|-----------|-------------------------------------------------------------------------|------------------|--------|
| Wood, 2015 <sup>35</sup> † | Australia | Australian Registry of Antiepileptic Drug Use in Pregnancy | 2007-2010 | Carbam, Carbam+Clonaz, Carbam+Lamot, Carbam+Pheny, Lamot+Valpro, Valpro | Autism/Dyspraxia | public |
|----------------------------|-----------|------------------------------------------------------------|-----------|-------------------------------------------------------------------------|------------------|--------|

---

**Abbreviations:** ADHD – Attention Deficit Hyperactivity Disorder; NR – Not Reported

Carbam = Carbamazepine; Clobaz = Clobazam; Clonaz = Clonazepam; Ethos = Ethosuximide; Gabap = Gabapentin; Lamot = Lamotrigine; Levet = Levetiracetam; Oxcar = Oxcarbazepine; Pheno = Phenobarbital; Pheny = Phenytoin; Pridmid = Primidone; Topir = Topiramate; Valpro = Valproate; Vigab = Viagabatratin

\*Single publication reporting on two separate cohorts

†Registry Studies

---

## Appendix H. Table of Patient characteristics

| Author, Year                                                                                 | Indication | Sample Size* | Mean Age (Women) | Mean Age (Children)/ Follow-up period† | AED Exposure Timing | Maternal Alcohol Use n/N‡ | Maternal Tobacco Use n/N‡ |
|----------------------------------------------------------------------------------------------|------------|--------------|------------------|----------------------------------------|---------------------|---------------------------|---------------------------|
| Adab, 2004a <sup>1</sup> §<br>[CR: Vinten, 2009 <sup>2</sup> ;<br>Mawer, 2002 <sup>3</sup> ] | Epilepsy   | 177          | 26.1             | 9-10.5                                 | NR                  | 24/279‡                   | 68/249‡                   |
| Adab, 2004b <sup>1</sup> §<br>[CR: Vinten, 2009 <sup>2</sup> ;<br>Mawer, 2002 <sup>3</sup> ] | Epilepsy   | 81           | 26.1             | 3-3.33                                 | NR                  | 24/279‡                   | 68/249‡                   |
| Arkilo, 2015 <sup>4</sup>                                                                    | Epilepsy   | 59           | NR               | NA                                     | First trimester     | NR                        | NR                        |
| Bromley, 2010 <sup>5</sup>                                                                   | NR         | 60           | NR               | 6-7                                    | Whole pregnancy     | NR                        | NR                        |
| Bromley, 2013 <sup>6</sup><br>[CR: Bromley, 2008 <sup>7</sup> ]                              | Epilepsy   | 156          | 28               | 6                                      | NR                  | 28/156                    | 42/156                    |
| Christensen, 2013 <sup>8</sup>                                                               | NR         | 2011         | NR               | NR                                     | Whole pregnancy     | NR                        | NR                        |
| Cohen, 2013 <sup>9</sup>                                                                     | Epilepsy   | 108          | 30               | 6                                      | NR                  | 12/192‡                   | NR                        |
| Cummings, 2011 <sup>10</sup><br>[CR: Tomson, 2015 <sup>11</sup> ]                            | Epilepsy   | 142          | NR               | 2-3                                    | Whole pregnancy     | 32/108‡                   | 19/108‡                   |
| Dean, 2002 <sup>12</sup><br>[CR: Rasalam, 2005 <sup>13</sup> ]                               | Epilepsy   | 287          | 27               | 3.75-15.5                              | First trimester     | NR                        | NR                        |
| D'Souza, 1991 <sup>14</sup>                                                                  | Epilepsy   | 42           | 26.5             | 2.5-3.5                                | Whole pregnancy     | NR                        | NR                        |
| Eriksson, 2005 <sup>15</sup><br>[CR: Viinikainen, 2006 <sup>16</sup> ]                       | Epilepsy   | 39           | 28.2             | NR                                     | NR                  | NR                        | NR                        |

|                                                                                                                                   |          |     |      |        |                 |    |         |
|-----------------------------------------------------------------------------------------------------------------------------------|----------|-----|------|--------|-----------------|----|---------|
| Gaily, 1990 <sup>17</sup><br>[CR: Gaily, 1990 <sup>18</sup> ,<br>Hiilesmaa, 1982 <sup>19</sup> ,<br>Hiilesmaa, 1985 <sup>20</sup> | Epilepsy | 134 | 27.8 | 5.5    | First trimester | NR | NR      |
| Gogatishvili, 2014 <sup>21</sup>                                                                                                  | NR       | 39  | NR   | 2 to 4 | NR              | NR | NR      |
| Gogatishvili, 2015 <sup>22</sup>                                                                                                  | NR       | 23  | NR   | 3 to 6 | NR              | NR | NR      |
| Jones, 1989 <sup>23</sup>                                                                                                         | Epilepsy | 63  | NR   | NR     | Whole pregnancy | NR | NR      |
| Katz, 2001 <sup>24</sup>                                                                                                          | Epilepsy | 51  | 31   | NR     | NR              | NR | NR      |
| Koch, 1996 <sup>25</sup>                                                                                                          | Epilepsy | 40  | NR   | 6      | First trimester | NR | NR      |
| Lacroix, 2012 <sup>26</sup>                                                                                                       | NR       | 109 | NR   | 0.75   | NR              | NR | NR      |
| Mawer, 2002 <sup>3</sup>                                                                                                          | Epilepsy | 52  | NR   | NR     | NR              | NR | NR      |
| Miskov, 2010 <sup>27</sup>                                                                                                        | Epilepsy | 55  | NR   | NR     | NR              | NR | NR      |
| Nadebaum, 2011 <sup>28</sup>                                                                                                      | Epilepsy | 66  | 31.6 | 7.4    | First trimester | NR | 5/66    |
| Rihtman, 2013 <sup>29</sup>                                                                                                       | Epilepsy | 72  | NR   | NR     | Whole pregnancy | NR | NR      |
| Scolnik, 1994 <sup>30</sup>                                                                                                       | Epilepsy | 75  | NR   | 1.5-3  | 1st trimester   | NR | NR      |
| Shankaran, 1996 <sup>31</sup>                                                                                                     | NR       | 96  | NR   | NR     | NR              | NR | NR      |
| Van der Pol, 1991 <sup>32</sup>                                                                                                   | Epilepsy | 57  | NR   | 6-13   | NR              | NR | NR      |
| Veiby, 2013a <sup>33</sup>                                                                                                        | Epilepsy | 422 | NR   | 0.5    | NR              | NR | NR      |
| Veiby, 2013b <sup>34</sup>                                                                                                        | Epilepsy | 248 | 28.9 | 3      | NR              | NR | 68/726‡ |
| Wood, 2015 <sup>35</sup>                                                                                                          | Epilepsy | 77  | NR   | 6-8    | NR              | NR | NR      |

**Abbreviations:** NA – Not applicable; NR – Not reported

\* Sample size used for analysis; ineligible treatment arms (i.e. treatment arms with excluded drugs or unspecified polytherapy) are not included in the count

† The mean age for children/follow-up period data were only collected for outcomes related to cognitive and/or psychomotor development

‡ Total sample size is based on the number of women enrolled in the study; may differ from the sample size used for analysis

§ Single publication reporting on two separate cohorts

1  
2  
3  
4  
5  
6  
7  
8  
9  
10  
11  
12  
13  
14  
15  
16  
17  
18  
19  
20  
21  
22  
23  
24  
25  
26  
27  
28  
29  
30  
31  
32  
33  
34  
35  
36  
37  
38  
39  
40  
41  
42  
43  
44  
45  
46  
47  
48  
49

**Appendix I. Methodological quality of observational studies – Newcastle Ottawa Scale results**

| <b>First Author, Year</b>        | <b>Representativeness of the exposed cohort</b> | <b>Selection of the non-exposed cohort</b> | <b>Ascertainment of exposure</b> | <b>Demonstration that outcome of interest was not present at start of study</b> | <b>Comparability of cohorts on the basis of the design or analysis</b> | <b>Assessment of outcome</b> | <b>Was follow-up long enough for outcomes to occur</b> | <b>Adequacy of follow up of cohorts</b> |
|----------------------------------|-------------------------------------------------|--------------------------------------------|----------------------------------|---------------------------------------------------------------------------------|------------------------------------------------------------------------|------------------------------|--------------------------------------------------------|-----------------------------------------|
| Adab, 2004 <sup>1</sup>          | B                                               | A                                          | A                                | A                                                                               | C                                                                      | A                            | A                                                      | C                                       |
| Arkilo, 2015 <sup>4</sup>        | B                                               | A                                          | B                                | A                                                                               | D                                                                      | A                            | A                                                      | C                                       |
| Bromley, 2010 <sup>5</sup>       | D                                               | A                                          | D                                | A                                                                               | D                                                                      | D                            | B                                                      | D                                       |
| Bromley, 2013 <sup>6</sup>       | A                                               | A                                          | A                                | A                                                                               | A                                                                      | A                            | A                                                      | C                                       |
| Christensen, 2013 <sup>8</sup>   | A                                               | A                                          | A                                | A                                                                               | A                                                                      | B                            | A                                                      | B                                       |
| Cohen, 2013 <sup>9</sup>         | A                                               | A                                          | D                                | A                                                                               | A                                                                      | A                            | A                                                      | C                                       |
| Cummings, 2011 <sup>10</sup>     | A                                               | A                                          | A                                | A                                                                               | A                                                                      | A                            | A                                                      | C                                       |
| Dean, 2002 <sup>12</sup>         | B                                               | A                                          | A                                | A                                                                               | D                                                                      | A                            | A                                                      | C                                       |
| D'Souza, 1991 <sup>14</sup>      | B                                               | A                                          | A                                | A                                                                               | D                                                                      | A                            | A                                                      | A                                       |
| Eriksson, 2005 <sup>15</sup>     | B                                               | A                                          | A                                | A                                                                               | B                                                                      | A                            | A                                                      | D                                       |
| Gaily, 1990 <sup>17</sup>        | B                                               | A                                          | A                                | A                                                                               | D                                                                      | A                            | A                                                      | A                                       |
| Gogatishvili, 2014 <sup>21</sup> | A                                               | A                                          | D                                | A                                                                               | D                                                                      | A                            | A                                                      | D                                       |

|                                  |   |   |   |   |   |   |   |   |
|----------------------------------|---|---|---|---|---|---|---|---|
| Gogatishvili, 2015 <sup>22</sup> | A | A | D | A | D | A | A | D |
| Jones, 1989 <sup>23</sup>        | A | A | B | A | D | A | A | B |
| Katz, 2001 <sup>24</sup>         | B | A | A | A | D | A | A | D |
| Koch, 1996 <sup>25</sup>         | B | A | B | A | D | A | A | C |
| Lacroix, 2012 <sup>26</sup>      | A | A | A | A | A | A | A | A |
| Mawer, 2002 <sup>3</sup>         | B | A | A | A | D | A | A | B |
| Miskov, 2010 <sup>27</sup>       | D | A | D | A | D | D | A | D |
| Nadebaum, 2011 <sup>28</sup>     | A | A | A | A | A | A | A | B |
| Rihtman, 2013 <sup>29</sup>      | A | B | A | A | A | A | A | C |
| Scolnik, 1994 <sup>30</sup>      | B | A | A | A | D | A | A | A |
| Shankaran, 1996 <sup>31</sup>    | B | A | A | A | D | A | A | B |
| Van der Pol, 1991 <sup>32</sup>  | B | A | D | A | A | A | A | B |
| Veiby, 2013a <sup>33</sup>       | A | A | A | A | A | A | A | D |
| Veiby, 2013b <sup>34</sup>       | A | A | A | A | A | A | A | C |
| Wood, 2015 <sup>35</sup>         | A | A | A | A | D | A | A | C |

**Abbreviations:** A – low risk; B – moderate risk; C – high risk; D – unclear risk

1  
2  
3  
4  
5  
6  
7  
8  
9  
10  
11  
12  
13  
14  
15  
16  
17  
18  
19  
20  
21  
22  
23  
24  
25  
26  
27  
28  
29  
30  
31  
32  
33  
34  
35  
36  
37  
38  
39  
40  
41  
42  
43  
44  
45  
46  
47  
48  
49

Appendix J. Comparison-adjusted funnel plots\*

**a. Cognitive Developmental Delay**

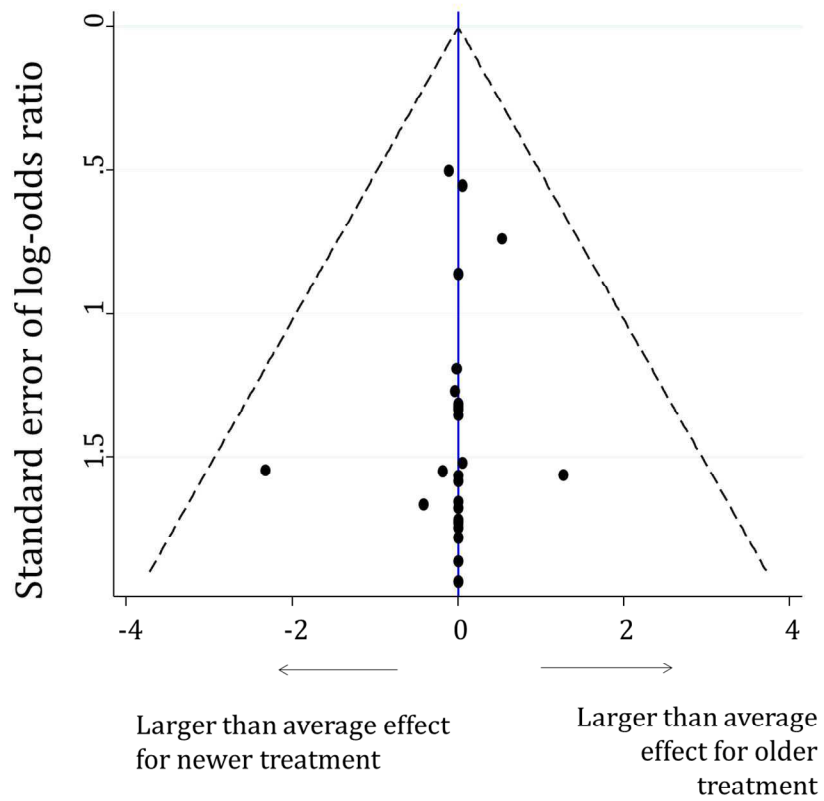

**b. Psychomotor Developmental Delay**

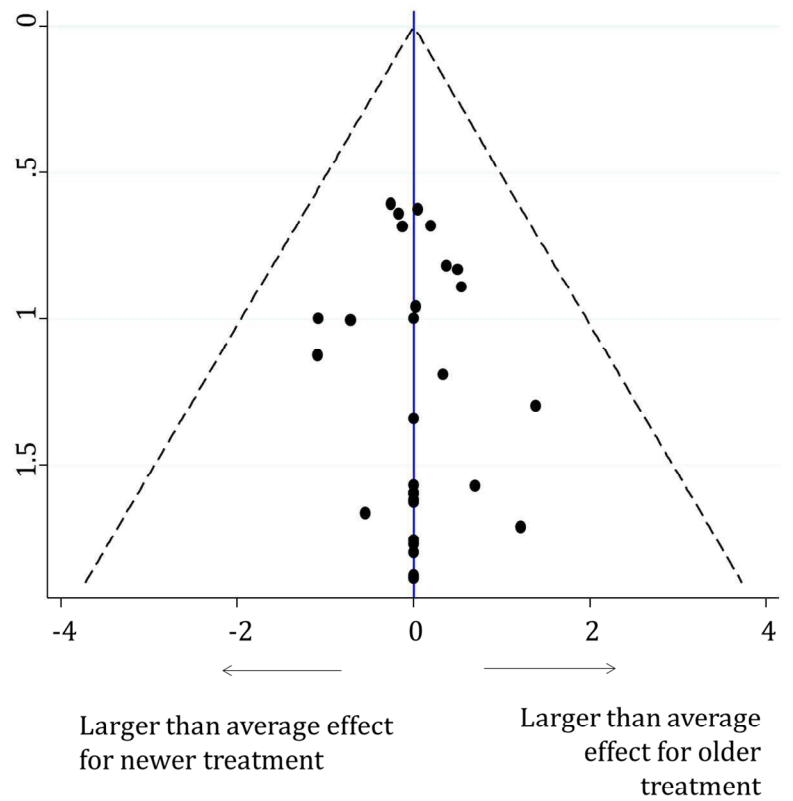

Log-odds ratio centered at comparison-specific pooled effect

\* Funnel plots have been produced only for outcomes with  $\geq 10$  studies. For multi-arm studies we plot data points from each study-specific basic parameter (treatment comparisons with a study-specific common comparator)



**Appendix K. Statistically significant network meta-analysis results along with meta-analysis results, transitivity, and inconsistency assessments**

| Treatment Comparison                                                           | Number of Studies (Mean Baseline Risk) | Number of patients (Mean Age) | Treatment Indication | Timing        | Comparability of cohorts | Adequacy of follow up of cohorts | MA Odds Ratio (95% CrI) | NMA Odds Ratio (95% CrI) (95% PrI)   |
|--------------------------------------------------------------------------------|----------------------------------------|-------------------------------|----------------------|---------------|--------------------------|----------------------------------|-------------------------|--------------------------------------|
| <b>Cognitive Developmental Delay (10 studies, 748 patients, 14 treatments)</b> |                                        |                               |                      |               |                          |                                  |                         |                                      |
| Carbam+Pheno+Valpro vs Control                                                 | NA                                     | NR                            | NR                   | NR            | NR                       | NR                               | NA                      | 17.31<br>(1.03-434.50) (0.86-488.60) |
| Lamot vs Valpro                                                                | 4 (NA)                                 | 140<br>(31.00)                | Epilepsy             | NR            | H                        | H                                | 0.17 (0.02-0.80)        | 0.13<br>(0.02-0.57) (0.01-0.79)      |
| Valpro vs Carbam                                                               | 1 (NA)                                 | 23<br>(31.00)                 | Epilepsy             | NR            | H                        | H                                | 0.44 (0.00-11.07)       | 3.69<br>(1.72-7.63) (0.94-13.88)     |
| Valpro vs Control                                                              | 3 (0.06)                               | 165<br>(28.80)                | Epilepsy             | NR            | H                        | H                                | 10.45 (3.42-33.73)      | 8.63<br>(3.01-25.74) (1.82-38.93)    |
| Valpro vs Pheno                                                                | 3 (NA)                                 | 36<br>(31.00)                 | Epilepsy             | 1st trimester | H                        | H                                | 4.41 (0.79-38.91)       | 5.87<br>(1.26-42.27) (0.93-56.07)    |
| Valpro vs Pheny                                                                | 3 (NA)                                 | 58<br>(31.00)                 | Epilepsy             | 1st trimester | H                        | H                                | 3.28 (0.81-14.38)       | 3.01<br>(1.06-9.18) (0.71-14.27)     |
| Common between-study variance across treatment comparisons                     |                                        |                               |                      |               |                          |                                  | 0.13 (0.00-1.01)        | 0.15 (0.00-1.25) (NA)                |
| Residual deviance: 40                                                          |                                        |                               |                      |               |                          |                                  |                         |                                      |
| Data points: 42                                                                |                                        |                               |                      |               |                          |                                  |                         |                                      |

| Treatment Comparison                                                      | Number of Studies (Mean Baseline Risk) | Number of patients (Mean Age) | Treatment Indication | Timing                                              | Comparability of cohorts | Adequacy of follow up of cohorts   | MA Odds Ratio (95% CrI) | NMA Odds Ratio (95% CrI) (95% PrI)                                 |
|---------------------------------------------------------------------------|----------------------------------------|-------------------------------|----------------------|-----------------------------------------------------|--------------------------|------------------------------------|-------------------------|--------------------------------------------------------------------|
| DIC: 69                                                                   |                                        |                               |                      |                                                     |                          |                                    |                         |                                                                    |
| Evaluation of consistency using the design-by-treatment interaction model |                                        |                               |                      | Chi-square test:<br>13.33<br>Degrees of Freedom: 16 |                          | P- value: 0.64<br>Heterogeneity: 0 |                         |                                                                    |
| <b>Autism Dyspraxia (5 studies, 2551 patients, 12 treatments)</b>         |                                        |                               |                      |                                                     |                          |                                    |                         |                                                                    |
| Lamot vs Control                                                          | 2 (0.00)                               | 254 (27.75)                   | Epilepsy             | 1st trimester                                       | H                        | H                                  | 13.77 (2.06-188.00)     | 8.88 (1.29-112.00) (0.94-146.80)                                   |
| Lamot+Valpro vs Carbam                                                    | 1 (NA)                                 | 40 (NR)                       | Epilepsy             | NR                                                  | L                        | L                                  | 15.02 (2.04-171.90)     | 22.89 (2.58-219.00) (1.90-282.20)                                  |
| Lamot+Valpro vs Clonaz                                                    | NA                                     | NR                            | NR                   | NR                                                  | NR                       | NR                                 | NA                      | 20.21 (1.48-351.30) (1.15-455.00)                                  |
| Lamot+Valpro vs Control                                                   | NA                                     | NR                            | NR                   | NR                                                  | NR                       | NR                                 | NA                      | 132.70 (7.41-3,9 x 10 <sup>3</sup> ) (5.82-4.6 x 10 <sup>3</sup> ) |
| Lamot+Valpro vs Lamot                                                     | NA                                     | NR                            | NR                   | NR                                                  | NR                       | NR                                 | NA                      | 14.61 (1.51-149.10) (1.14-196.80)                                  |
| Oxcar vs Control                                                          | NA                                     | NR                            | NR                   | NR                                                  | NR                       | NR                                 | NA                      | 13.51 (1.28-221.40) (0.86-267.40)                                  |
| Valpro vs Carbam                                                          | 5 (NA)                                 | 1003 (27.83)                  | Epilepsy             | 1st trimester                                       | L                        | L                                  | 3.20 (1.20-8.68)        | 3.02 (1.09-8.40) (0.57-                                            |

| Treatment Comparison                                                              | Number of Studies (Mean Baseline Risk) | Number of patients (Mean Age) | Treatment Indication | Timing                                            | Comparability of cohorts | Adequacy of follow up of cohorts   | MA Odds Ratio (95% CrI) | NMA Odds Ratio (95% CrI) (95% PrI)            |
|-----------------------------------------------------------------------------------|----------------------------------------|-------------------------------|----------------------|---------------------------------------------------|--------------------------|------------------------------------|-------------------------|-----------------------------------------------|
| Valpro vs Control                                                                 | 2 (0.00)                               | 249 (27.75)                   | Epilepsy             | 1st trimester                                     | H                        | H                                  | 9.19 (1.14-132.10)      | 14.31<br>17.29<br>(2.40-217.60) (1.61-274.90) |
| Common between-study variance across treatment comparisons                        |                                        |                               |                      |                                                   |                          |                                    | 0.12 (0.00-1.37)        | 0.16 (0.00-1.95) (NA)                         |
| Residual deviance: 24<br>Data points: 24<br>DIC: 44                               |                                        |                               |                      |                                                   |                          |                                    |                         |                                               |
| Evaluation of consistency using the design-by-treatment interaction model         |                                        |                               |                      | Chi-square test:<br>3.79<br>Degrees of Freedom: 5 |                          | P- value: 0.57<br>Heterogeneity: 0 |                         |                                               |
| <b>Psychomotor Developmental Delay (11 studies, 1145 patients, 18 treatments)</b> |                                        |                               |                      |                                                   |                          |                                    |                         |                                               |
| Carbam+Pheno+Valpro vs Control                                                    | NA                                     | NR                            | NR                   | NR                                                | NR                       | NR                                 | NA                      | 19.12<br>(1.49-337.50) (1.34-370.40)          |
| Carbam+Pheno+Valpro vs Pheno                                                      | NA                                     | NR                            | NR                   | NR                                                | NR                       | NR                                 | NA                      | 19.86<br>(1.38-393.60) (1.26-423.30)          |
| Levet vs Carbam+Pheno+Valpro                                                      | NA                                     | NR                            | NR                   | NR                                                | NR                       | NR                                 | NA                      | 0.01<br>(0.00-0.58) (0.00-0.62)               |
| Valpro vs Carbam                                                                  | 7 (NA)                                 | 331 (27.80)                   | Epilepsy             | 1st trimester                                     | H                        | H                                  | 2.72 (1.39-5.67)        | 2.45<br>(1.27-4.88) (0.95-6.77)               |
| Valpro vs Control                                                                 | 5 (0.07)                               | 331                           | Epilepsy             | 1st                                               | H                        | H                                  | 3.53 (1.60-             | 4.16                                          |

1  
2  
3  
4  
5  
6  
7  
8  
9  
10  
11  
12  
13  
14  
15  
16  
17  
18  
19  
20  
21  
22  
23  
24  
25  
26  
27  
28  
29  
30  
31  
32  
33  
34  
35  
36  
37  
38  
39  
40  
41  
42  
43  
44  
45  
46  
47  
48  
49

| Treatment Comparison                                                      | Number of Studies (Mean Baseline Risk) | Number of patients (Mean Age) | Treatment Indication | Timing                                              | Comparability of cohorts | Adequacy of follow up of cohorts   | MA Odds Ratio (95% CrI) | NMA Odds Ratio (95% CrI) (95% PrI) |
|---------------------------------------------------------------------------|----------------------------------------|-------------------------------|----------------------|-----------------------------------------------------|--------------------------|------------------------------------|-------------------------|------------------------------------|
|                                                                           |                                        | (28.38)                       |                      | trimester                                           |                          |                                    | 8.64                    | (2.04-8.75) (1.52-12.05)           |
| Valpro vs Pheno                                                           | 2 (NA)                                 | 141 (NR)                      | Epilepsy             | 1st trimester                                       | H                        | H                                  | 3.68 (1.17-12.30)       | 4.32 (1.72-11.20) (1.34-14.51)     |
| Common between-study variance across treatment comparisons                |                                        |                               |                      |                                                     |                          |                                    | 0.05 (0.00-0.49)        | 0.06 (0.00-0.63) (NA)              |
| Residual deviance: 45<br>Data points: 51<br>DIC: 78                       |                                        |                               |                      |                                                     |                          |                                    |                         |                                    |
| Evaluation of consistency using the design-by-treatment interaction model |                                        |                               |                      | Chi-square test:<br>13.46<br>Degrees of Freedom: 21 |                          | P- value: 0.89<br>Heterogeneity: 0 |                         |                                    |
| <b>Language Delay (5 studies, 509 patients, 5 treatments)</b>             |                                        |                               |                      |                                                     |                          |                                    |                         |                                    |
| Valpro vs Control                                                         | 1 (0.03)                               | 173 (28.90)                   | Epilepsy             | NR                                                  | L                        | H                                  | 6.96 (1.14-37.03)       | 7.95 (1.50-49.13) (0.96-74.52)     |
| Common between-study variance across treatment comparisons                |                                        |                               |                      |                                                     |                          |                                    | 0.15 (0.00-1.85)        | 0.16 (0.00-2.15) (NA)              |
| Residual deviance: 12<br>Data points: 14<br>DIC: 23                       |                                        |                               |                      |                                                     |                          |                                    |                         |                                    |
| Evaluation of consistency using the design-by-treatment interaction model |                                        |                               |                      | Chi-square test:<br>2.33<br>Degrees of Freedom: 3   |                          | P- value: 0.50<br>Heterogeneity: 0 |                         |                                    |

| Treatment Comparison                                                                                                                                                                                                                                                                                                                                                                                                                                                                                                                                                                                                                            | Number of Studies (Mean Baseline Risk) | Number of patients (Mean Age) | Treatment Indication | Timing | Comparability of cohorts | Adequacy of follow up of cohorts | MA Odds Ratio (95% CrI) | NMA Odds Ratio (95% CrI) (95% PrI) |
|-------------------------------------------------------------------------------------------------------------------------------------------------------------------------------------------------------------------------------------------------------------------------------------------------------------------------------------------------------------------------------------------------------------------------------------------------------------------------------------------------------------------------------------------------------------------------------------------------------------------------------------------------|----------------------------------------|-------------------------------|----------------------|--------|--------------------------|----------------------------------|-------------------------|------------------------------------|
| <b>ADHD (4 studies, 750 patients, 6 treatments)</b>                                                                                                                                                                                                                                                                                                                                                                                                                                                                                                                                                                                             |                                        |                               |                      |        |                          |                                  |                         |                                    |
| Residual deviance:12                                                                                                                                                                                                                                                                                                                                                                                                                                                                                                                                                                                                                            |                                        |                               |                      |        |                          |                                  |                         |                                    |
| Data points: 17                                                                                                                                                                                                                                                                                                                                                                                                                                                                                                                                                                                                                                 |                                        |                               |                      |        |                          |                                  |                         |                                    |
| DIC: 22                                                                                                                                                                                                                                                                                                                                                                                                                                                                                                                                                                                                                                         |                                        |                               |                      |        |                          |                                  |                         |                                    |
| <p><b>Abbreviations:</b> ADHD - Attention Deficit Hyperactivity Disorder; CrI - Credible Interval; DIC - Deviance Information Criterion; H- high risk of bias; L - low risk of bias; MA - Meta-analysis; NA - Not applicable; NMA - Network Meta-analysis; NR- Not Reported; PrI - Predictive Interval; ROB - Risk of Bias</p> <p>Carbam = Carbamazepine; Clobaz = Clobazam; Clonaz = Clonazepam; Ethos = Ethosuximide; Gabap = Gabapentin; Lamot = Lamotrigine; Levet = Levetiracetam; Oxcar = Oxcarbazepine; Pheno = Phenobarbital; Pheny = Phenytoin; Pridmid = Primidone; Topir = Topiramate; Valpro = Valproate; Vigab = Viagabatratin</p> |                                        |                               |                      |        |                          |                                  |                         |                                    |

1  
2  
3  
4  
5  
6  
7  
8  
9  
10  
11  
12  
13  
14  
15  
16  
17  
18  
19  
20  
21  
22  
23  
24  
25  
26  
27  
28  
29  
30  
31  
32  
33  
34  
35  
36  
37  
38  
39  
40  
41  
42  
43  
44  
45  
46  
47  
48  
49

**Appendix L. Frequencies, events and samples sizes, SUCRA values, and total group risks per treatment and outcome**

| <b>Treatment</b>                      | <b>Frequency of treatment in network</b> | <b>Total # events/Total Sample size</b> | <b>Median SUCRA (95% CrI)</b> | <b>Total Group Risk Median (IQR)</b> |
|---------------------------------------|------------------------------------------|-----------------------------------------|-------------------------------|--------------------------------------|
| <b>Cognitive Developmental Delay</b>  |                                          |                                         |                               |                                      |
| Carbamazepine+Levetiracetam           | 1                                        | 0/2                                     | 0.86 (0.07-1.00)              | 0.00 (0.00-0.00)                     |
| Carbamazepine+Phenobarbital           | 1                                        | 0/3                                     | 0.86 (0.14-1.00)              | 0.00 (0.00-0.00)                     |
| Control                               | 4                                        | 8/125                                   | 0.79 (0.43-0.93)              | 0.04 (0.00-0.09)                     |
| Lamotrigine                           | 4                                        | 0/43                                    | 0.71 (0.29-1.00)              | 0.00 (0.00-0.00)                     |
| Phenobarbital+Phenytoin               | 1                                        | 0/15                                    | 0.71 (0.07-1.00)              | 0.00 (0.00-0.00)                     |
| Phenobarbital                         | 3                                        | 1/12                                    | 0.64 (0.21-1.00)              | 0.00 (0.00-0.33)                     |
| Carbamazepine                         | 9                                        | 29/238                                  | 0.50 (0.29-0.79)              | 0.15 (0.05-0.20)                     |
| Primidone                             | 2                                        | 2/13                                    | 0.50 (0.14-0.93)              | 0.09 (0.00-0.18)                     |
| Phenytoin                             | 5                                        | 11/111                                  | 0.43 (0.21-0.79)              | 0.10 (0.00-0.21)                     |
| Phenytoin+Valproate                   | 1                                        | 0/5                                     | 0.36 (0.00-1.00)              | 0.00 (0.00-0.00)                     |
| Carbamazepine+Phenobarbital+Phenytoin | 1                                        | 0/4                                     | 0.29 (0.00-1.00)              | 0.00 (0.00-0.00)                     |
| Ethosuximide+Phenytoin                | 1                                        | 0/3                                     | 0.21 (0.00-1.00)              | 0.00 (0.00-0.00)                     |
| Valproate                             | 7                                        | 50/160                                  | 0.21 (0.00-0.43)              | 0.35 (0.25-0.50)                     |
| Carbamazepine+Phenytoin               | 1                                        | 1/11                                    | 0.14 (0.00-0.79)              | 0.09 (0.09-0.09)                     |
| Carbamazepine+Phenobarbital+Valproate | 1                                        | 2/3                                     | 0.07 (0.00-0.71)              | 0.67 (0.67-0.67)                     |
| <b>Autism/Dyspraxia</b>               |                                          |                                         |                               |                                      |
| Control                               | 2                                        | 1/180                                   | 0.91 (0.55-1.00)              | 0.00 (0.00-0.01)                     |
| Levetiracetam                         | 1                                        | 0/11                                    | 0.73 (0.09-1.00)              | 0.00 (0.00-0.00)                     |
| Carbamazepine                         | 5                                        | 8/518                                   | 0.64 (0.36-                   | 0.03 (0.01-                          |

| Treatment                              | Frequency of treatment in network | Total # events/Total Sample size | Median SUCRA (95% CrI) | Total Group Risk Median (IQR) |
|----------------------------------------|-----------------------------------|----------------------------------|------------------------|-------------------------------|
|                                        |                                   |                                  | 0.91)                  | 0.06)                         |
| Carbamazepine+Lamotrigine              | 1                                 | 0/5                              | 0.64 (0.00-1.00)       | 0.00 (0.00-0.00)              |
| Clonazepam                             | 1                                 | 3/269                            | 0.64 (0.18-0.91)       | 0.01 (0.01-0.01)              |
| Carbamazepine+Phenytoin                | 1                                 | 0/3                              | 0.55 (0.00-1.00)       | 0.00 (0.00-0.00)              |
| Phenytoin                              | 1                                 | 0/5                              | 0.55 (0.00-1.00)       | 0.00 (0.00-0.00)              |
| Carbamazepine+Clonazepam               | 1                                 | 0/3                              | 0.45 (0.00-1.00)       | 0.00 (0.00-0.00)              |
| Lamotrigine                            | 4                                 | 14/745                           | 0.45 (0.18-0.82)       | 0.04 (0.01-0.08)              |
| Oxcarbazepine                          | 1                                 | 7/321                            | 0.36 (0.09-0.82)       | 0.02 (0.02-0.02)              |
| Valproate                              | 5                                 | 21/485                           | 0.27 (0.09-0.55)       | 0.05 (0.03-0.08)              |
| Lamotrigine+Valproate                  | 1                                 | 3/6                              | 0.00 (0.00-0.27)       | 0.50 (0.50-0.50)              |
| <b>Neonatal Seizure</b>                |                                   |                                  |                        |                               |
| Lamotrigine                            | 1                                 | 3/42                             | NA                     | 0.07 (NA)                     |
| Valproate                              | 1                                 | 0/30                             | NA                     | 0.00 (NA)                     |
| <b>Psychomotor Developmental Delay</b> |                                   |                                  |                        |                               |
| Levetiracetam                          | 1                                 | 0/11                             | 0.94 (0.29-1.00)       | 0.00 (0.00-0.00)              |
| Phenobarbital+Phenytoin                | 1                                 | 0/15                             | 0.82 (0.12-1.00)       | 0.00 (0.00-0.00)              |
| Carbamazepine+Phenytoin                | 1                                 | 0/11                             | 0.76 (0.06-1.00)       | 0.00 (0.00-0.00)              |
| Control                                | 8                                 | 21/323                           | 0.76 (0.53-0.94)       | 0.06 (0.03-0.10)              |
| Phenobarbital                          | 4                                 | 11/117                           | 0.76 (0.47-0.94)       | 0.07 (0.02-0.17)              |
| Carbamazepine                          | 10                                | 32/249                           | 0.59 (0.35-0.82)       | 0.10 (0.06-0.16)              |
| Carbamazepine+Phenobarbital            | 2                                 | 3/15                             | 0.59 (0.18-0.94)       | 0.13 (0.00-0.25)              |
| Lamotrigine                            | 4                                 | 11/126                           | 0.53 (0.24-0.82)       | 0.09 (0.06-0.12)              |
| Clonazepam                             | 1                                 | 4/27                             | 0.47 (0.12-0.88)       | 0.15 (0.15-0.15)              |

| Treatment                             | Frequency of treatment in network | Total # events/Total Sample size | Median SUCRA (95% CrI) | Total Group Risk Median (IQR) |
|---------------------------------------|-----------------------------------|----------------------------------|------------------------|-------------------------------|
| Phenytoin+Valproate                   | 1                                 | 0/5                              | 0.47 (0.00-1.00)       | 0.00 (0.00-0.00)              |
| Carbamazepine+Phenobarbital+Phenytoin | 1                                 | 0/4                              | 0.41 (0.00-1.00)       | 0.00 (0.00-0.00)              |
| Clobazam                              | 1                                 | 1/6                              | 0.41 (0.00-0.94)       | 0.17 (0.17-0.17)              |
| Phenytoin                             | 3                                 | 10/83                            | 0.41 (0.12-0.71)       | 0.04 (0.00-0.33)              |
| Ethosuximide+Phenytoin                | 1                                 | 0/3                              | 0.35 (0.00-1.00)       | 0.00 (0.00-0.00)              |
| Topiramate                            | 2                                 | 1/6                              | 0.29 (0.00-0.88)       | 0.13 (0.00-0.25)              |
| Valproate                             | 7                                 | 36/137                           | 0.24 (0.06-0.53)       | 0.28 (0.11-0.38)              |
| Gabapentin                            | 2                                 | 1/4                              | 0.12 (0.00-0.76)       | 0.25 (0.00-0.50)              |
| Carbamazepine+Phenobarbital+Valproate | 1                                 | 2/3                              | 0.06 (0.00-0.59)       | 0.67 (0.67-0.67)              |
| <b>Language Delay</b>                 |                                   |                                  |                        |                               |
| Control                               | 2                                 | 17/209                           | 0.75 (0.50-1.00)       | 0.13 (0.03-0.24)              |
| Phenobarbital                         | 1                                 | 10/41                            | 0.75 (0.00-1.00)       | 0.24 (0.24-0.24)              |
| Carbamazepine                         | 4                                 | 17/117                           | 0.50 (0.00-0.75)       | 0.15 (0.06-0.25)              |
| Lamotrigine                           | 3                                 | 6/59                             | 0.50 (0.00-1.00)       | 0.00 (0.00-0.14)              |
| Valproate                             | 4                                 | 21/83                            | 0.00 (0.00-0.50)       | 0.22 (0.12-0.35)              |
| <b>ADHD</b>                           |                                   |                                  |                        |                               |
| Phenytoin                             | 2                                 | 2/41                             | 1.00 (0.20-1.00)       | 0.05 (0.04-0.06)              |
| Control                               | 3                                 | 6/218                            | 0.80 (0.20-1.00)       | 0.03 (0.00-0.05)              |
| Phenobarbital                         | 1                                 | 4/61                             | 0.60 (0.00-1.00)       | 0.07 (0.07-0.07)              |
| Lamotrigine                           | 3                                 | 7/105                            | 0.40 (0.00-0.80)       | 0.07 (0.00-0.13)              |
| Carbamazepine                         | 4                                 | 17/182                           | 0.20 (0.00-0.60)       | 0.09 (0.04-0.13)              |
| Valproate                             | 4                                 | 12/143                           | 0.20 (0.00-            | 0.08 (0.03-                   |



| Treatment                | Frequency of treatment in network | Total # events/Total Sample size | Median SUCRA (95% CrI) | Total Group Risk Median (IQR) |
|--------------------------|-----------------------------------|----------------------------------|------------------------|-------------------------------|
|                          |                                   |                                  | 0.80)                  | 0.16)                         |
| <b>Social Impairment</b> |                                   |                                  |                        |                               |
| Carbamazepine            | 1                                 | 6/48                             | NA                     | 0.13 (NA)                     |
| Control                  | 1                                 | 37/276                           | NA                     | 0.13 (NA)                     |
| Lamotrigine              | 1                                 | 9/71                             | NA                     | 0.13 (NA)                     |
| Valproate                | 1                                 | 1/27                             | NA                     | 0.04 (NA)                     |

**Abbreviations:** ADHD - attention deficit hyperactivity disorder; CrI - Credible Interval; IQR - interquartile range; NA - Not applicable; SUCRA - surface under the cumulative ranking curve

Carbam = Carbamazepine; Clobaz = Clobazam; Clonaz = Clonazepam; Ethos = Ethosuximide; Gabap = Gabapentin; Lamot = Lamotrigine; Levet = Levetiracetam; Oxcar = Oxcarbazepine; Pheno = Phenobarbital; Pheny = Phenytoin; Pridmid = Primidone; Topir = Topiramate; Valpro = Valproate; Vigab = Viagabatratin

Appendix M. Rank-heat plot of cognitive developmental delay, autism/dyspraxia, psychomotor developmental delay, language delay, and attention deficit hyperactivity disorder outcomes\*

| Treatments             |
|------------------------|
| a: Control             |
| b: Pheno               |
| c: Lamot               |
| d: Carbam              |
| e: Pheny               |
| f: Levet               |
| g: Pheno+Pheny         |
| h: Carbam+Pheno        |
| i: Clonaz              |
| j: Valpro              |
| k: Carbam+Pheny        |
| l: Carbam+Levet        |
| m: Pheny+Valpro        |
| n: Carbam+Pheno+Pheny  |
| o: Carbam+Lamot        |
| p: Ethos+Pheny         |
| q: Carbam+Pheny        |
| r: Primid              |
| s: Carbam+Clonaz       |
| t: Clobaz              |
| u: Oxcar               |
| v: Topir               |
| w: Carbam+Pheno+Valpro |
| x: Gabap               |
| y: Lamot+Valpro        |

| Outcomes                                                                         |
|----------------------------------------------------------------------------------|
| Circles from outside in refer to :                                               |
| 1st: Cognit Developm Delay                                                       |
| 2nd: Autism/Dyspraxia                                                            |
| 3rd: Psych Developm Delay                                                        |
| 4th: Language delay                                                              |
| 5th: ADHD                                                                        |
| White sectors refer to treatments without data on the outcome within the circle. |

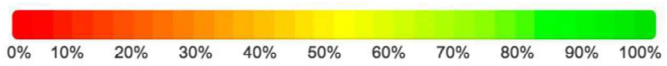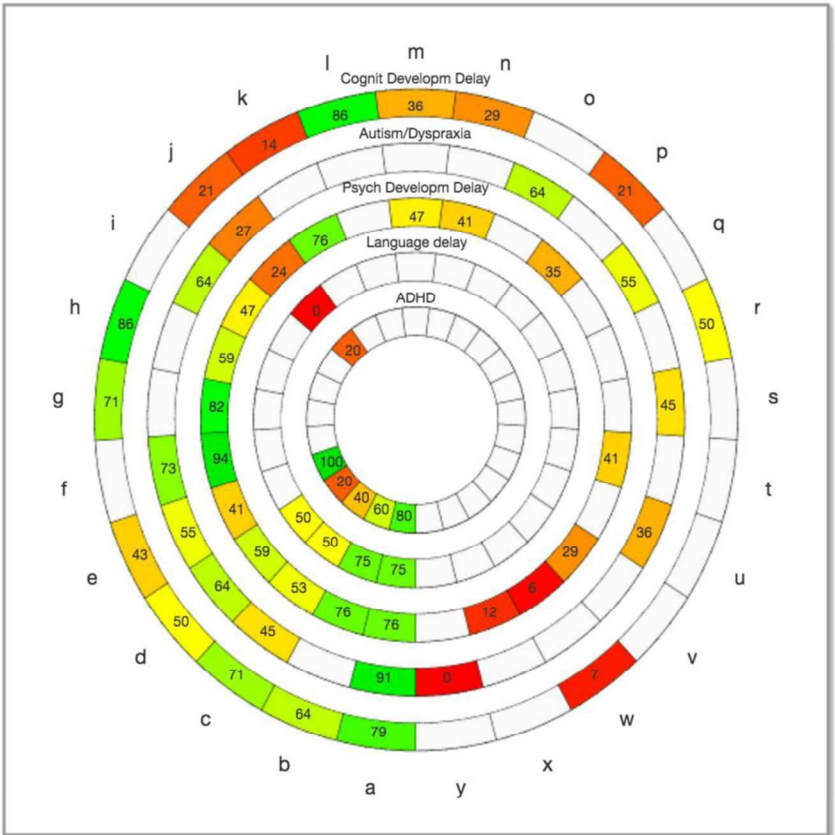

**Abbreviations:** carbam - carbamazepine, clobaz - clobazam, clonaz - clonazepam, ethos - ethosuximide, gabap - gabapentin, lamot - lamotrigine, levet - levetiracetam, oxcar - oxcarbazepine, pheno - phenobarbital, pheny - phenytoin, primid - primidone, topir - topiramate, valpro - valproate, vigab - vigabatrin

1  
2  
3 \*Rank-heat plot of cognitive developmental delay, autism/dyspraxia, psychomotor developmental delay, language delay, and attention  
4 deficit hyperactivity disorder outcomes (5 circles) and 25 treatments (25 radii). Each sector is coloured according to the surface under  
5 the cumulative ranking curve value of the corresponding treatment and outcome using the transformation of three colours red (0%),  
6 yellow (50%), and green (100%).  
7  
8  
9  
10  
11  
12  
13  
14  
15  
16  
17  
18  
19  
20  
21  
22  
23  
24  
25  
26  
27  
28  
29  
30  
31  
32  
33  
34  
35  
36  
37  
38  
39  
40  
41  
42  
43  
44  
45  
46  
47  
48  
49

For peer review only

## Appendix N. Number of studies and treatments per outcome

| Total studies                          | Range of study arms | # of treatments | # of patients | # of direct treatment comparisons | # of NMA treatment comparisons | Statistically significant NMA treatment effects | # of studies with zero events in all arms | # of studies with ineligible outcome definition* |
|----------------------------------------|---------------------|-----------------|---------------|-----------------------------------|--------------------------------|-------------------------------------------------|-------------------------------------------|--------------------------------------------------|
| <b>Cognitive Developmental Delay</b>   |                     |                 |               |                                   |                                |                                                 |                                           |                                                  |
| 10                                     | (2,8)               | 14              | 748           | 53                                | 105                            | 6                                               | 0                                         | 5                                                |
| <b>Autism/Dyspraxia</b>                |                     |                 |               |                                   |                                |                                                 |                                           |                                                  |
| 5                                      | (4,6)               | 12              | 2551          | 34                                | 66                             | 8                                               | 0                                         | 4                                                |
| <b>Neonatal Seizure</b>                |                     |                 |               |                                   |                                |                                                 |                                           |                                                  |
| 1                                      | (2,2)               | 2               | 69            | 1                                 | 0                              | 0                                               | 1                                         | 1                                                |
| <b>Psychomotor Developmental Delay</b> |                     |                 |               |                                   |                                |                                                 |                                           |                                                  |
| 11                                     | (2,8)               | 18              | 1145          | 74                                | 153                            | 6                                               | 0                                         | 5                                                |
| <b>Language Delay</b>                  |                     |                 |               |                                   |                                |                                                 |                                           |                                                  |
| 5                                      | (2,4)               | 5               | 509           | 7                                 | 10                             | 1                                               | 0                                         | 3                                                |
| <b>ADHD</b>                            |                     |                 |               |                                   |                                |                                                 |                                           |                                                  |
| 4                                      | (4,5)               | 6               | 750           | 14                                | 15                             | 0                                               | 0                                         | 0                                                |
| <b>Social Impairment</b>               |                     |                 |               |                                   |                                |                                                 |                                           |                                                  |
| 1                                      | (4,4)               | 4               | 422           | 1                                 | 0                              | 0                                               | 0                                         | 0                                                |

**Abbreviations:** ADHD - Attention Deficit Hyperactivity Disorder; NMA - Network Meta-analysis  
 \*See Appendix A for outcome definitions

# BMJ Open

## Comparative safety of anti-epileptic drugs for neurological development in children exposed during pregnancy and breastfeeding: a systematic review and network meta-analysis

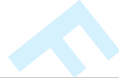

|                                    |                                                                                                                                                                                                                                                                                                                                                                                                                                                                                                                                                                                                                                                                                                                                                                                                                                                                                                                                                                                                                                                                                                                                                                                                                                                                                                                                                                                                                                                                                                                                                                                                                                                                                                                                    |
|------------------------------------|------------------------------------------------------------------------------------------------------------------------------------------------------------------------------------------------------------------------------------------------------------------------------------------------------------------------------------------------------------------------------------------------------------------------------------------------------------------------------------------------------------------------------------------------------------------------------------------------------------------------------------------------------------------------------------------------------------------------------------------------------------------------------------------------------------------------------------------------------------------------------------------------------------------------------------------------------------------------------------------------------------------------------------------------------------------------------------------------------------------------------------------------------------------------------------------------------------------------------------------------------------------------------------------------------------------------------------------------------------------------------------------------------------------------------------------------------------------------------------------------------------------------------------------------------------------------------------------------------------------------------------------------------------------------------------------------------------------------------------|
| Journal:                           | <i>BMJ Open</i>                                                                                                                                                                                                                                                                                                                                                                                                                                                                                                                                                                                                                                                                                                                                                                                                                                                                                                                                                                                                                                                                                                                                                                                                                                                                                                                                                                                                                                                                                                                                                                                                                                                                                                                    |
| Manuscript ID                      | bmjopen-2017-017248.R1                                                                                                                                                                                                                                                                                                                                                                                                                                                                                                                                                                                                                                                                                                                                                                                                                                                                                                                                                                                                                                                                                                                                                                                                                                                                                                                                                                                                                                                                                                                                                                                                                                                                                                             |
| Article Type:                      | Research                                                                                                                                                                                                                                                                                                                                                                                                                                                                                                                                                                                                                                                                                                                                                                                                                                                                                                                                                                                                                                                                                                                                                                                                                                                                                                                                                                                                                                                                                                                                                                                                                                                                                                                           |
| Date Submitted by the Author:      | 25-May-2017                                                                                                                                                                                                                                                                                                                                                                                                                                                                                                                                                                                                                                                                                                                                                                                                                                                                                                                                                                                                                                                                                                                                                                                                                                                                                                                                                                                                                                                                                                                                                                                                                                                                                                                        |
| Complete List of Authors:          | Veroniki, Areti Angeliki; Li Ka Shing Knowledge Institute, St. Michael's Hospital<br>Rios, Patricia; Li Ka Shing Knowledge Institute, St. Michael's Hospital<br>Cogo, Elise; Li Ka Shing Knowledge Institute, St. Michael's Hospital<br>Straus, Sharon; Li Ka Shing Knowledge Institute, St. Michael's Hospital;<br>University of Toronto, Department of Medicine<br>Finkelstein, Yaron; The Hospital for Sick Children; University of Toronto,<br>Department of Paediatrics<br>Kealey, M.; Li Ka Shing Knowledge Institute, St. Michael's Hospital<br>Reynen, Emily; Li Ka Shing Knowledge Institute, St. Michael's Hospital<br>Soobiah, Charlene; Li Ka Shing Knowledge Institute, St. Michael's Hospital;<br>University of Toronto, Institute for Health Policy Management & Evaluation<br>Thavorn, Kednapa; University of Ottawa, School of Epidemiology, Public<br>Health and Preventive Medicine, Faculty of Medicine; The Ottawa Hospital<br>Research Institute, Clinical Epidemiology Program<br>Hutton, Brian; University of Ottawa, School of Epidemiology, Public Health<br>and Preventive Medicine, Faculty of Medicine; Ottawa Hospital Research<br>Institute, Center for Practice Changing Research<br>Hemmelgarn, BR; University of Calgary, Departments of Medicine and<br>Community Health Sciences<br>Yazdi, Fatemeh; Li Ka Shing Knowledge Institute, St. Michael's Hospital<br>D'Souza, Jennifer; Li Ka Shing Knowledge Institute, St. Michael's Hospital<br>MacDonald, Heather; Li Ka Shing Knowledge Institute, St. Michael's<br>Hospital<br>Tricco, Andrea; Li Ka Shing Knowledge Institute, St. Michael's Hospital;<br>University of Toronto, Epidemiology Division, Dalla Lana School of Public<br>Health |
| <b>Primary Subject<br>Heading</b>: | Neurology                                                                                                                                                                                                                                                                                                                                                                                                                                                                                                                                                                                                                                                                                                                                                                                                                                                                                                                                                                                                                                                                                                                                                                                                                                                                                                                                                                                                                                                                                                                                                                                                                                                                                                                          |
| Secondary Subject Heading:         | Obstetrics and gynaecology                                                                                                                                                                                                                                                                                                                                                                                                                                                                                                                                                                                                                                                                                                                                                                                                                                                                                                                                                                                                                                                                                                                                                                                                                                                                                                                                                                                                                                                                                                                                                                                                                                                                                                         |
| Keywords:                          | multiple treatment meta-analysis, knowledge synthesis, Epilepsy < NEUROLOGY, pregnancy, infants, developmental delay                                                                                                                                                                                                                                                                                                                                                                                                                                                                                                                                                                                                                                                                                                                                                                                                                                                                                                                                                                                                                                                                                                                                                                                                                                                                                                                                                                                                                                                                                                                                                                                                               |
|                                    |                                                                                                                                                                                                                                                                                                                                                                                                                                                                                                                                                                                                                                                                                                                                                                                                                                                                                                                                                                                                                                                                                                                                                                                                                                                                                                                                                                                                                                                                                                                                                                                                                                                                                                                                    |

1  
2  
3  
4  
5  
6  
7  
8  
9  
10  
11  
12  
13  
14  
15  
16  
17  
18  
19  
20  
21  
22  
23  
24  
25  
26  
27  
28  
29  
30  
31  
32  
33  
34  
35  
36  
37  
38  
39  
40  
41  
42  
43  
44  
45  
46  
47  
48  
49  
50  
51  
52  
53  
54  
55  
56  
57  
58  
59  
60

SCHOLARONE™  
Manuscripts

For peer review only

1  
2  
3  
4 1 **Comparative safety of anti-epileptic drugs for neurological**  
5  
6 2 **development in children exposed during pregnancy and**  
7  
8  
9 3 **breastfeeding: a systematic review and network meta-analysis**  
10

11 4 Areti Angeliki Veroniki, PhD, MSc<sup>1</sup> Email: [VeronikiA@smh.ca](mailto:VeronikiA@smh.ca)  
12  
13 5 Patricia Rios, MSc<sup>1</sup> Email: [RiosP@smh.ca](mailto:RiosP@smh.ca)  
14  
15 6 Elise Cogo, ND, MLIS<sup>1</sup> Email: [CogoE@smh.ca](mailto:CogoE@smh.ca)  
16  
17 7 Sharon E. Straus, MD, MSc<sup>1,2</sup> Email: [Sharon.straus@utoronto.ca](mailto:Sharon.straus@utoronto.ca)  
18  
19 8 Yaron Finkelstein, MD<sup>3,4,5</sup> Email: [Yaron.Finkelstein@sickkids.ca](mailto:Yaron.Finkelstein@sickkids.ca)  
20  
21 9 Ryan Kealey, PhD<sup>1</sup> Email: [ryan.kealey@utoronto.ca](mailto:ryan.kealey@utoronto.ca)  
22  
23 10 Emily Reynen, MD, CM, PharmD<sup>1</sup> Email: [ereynen@gmail.com](mailto:ereynen@gmail.com)  
24  
25 11 Charlene Soobiah, PhD (Cand.)<sup>1,6</sup> Email: [SoobiahC@smh.ca](mailto:SoobiahC@smh.ca)  
26  
27 12 Kednapa Thavorn, PhD<sup>7,8,9</sup> Email: [kthavorn@ohri.ca](mailto:kthavorn@ohri.ca)  
28  
29 13 Brian Hutton, PhD, MSc<sup>7,10</sup> Email: [bhutton@ohri.ca](mailto:bhutton@ohri.ca)  
30  
31 14 Brenda R. Hemmelgarn, MD, PhD<sup>11</sup> Email: [Bhemmelg@ucalgary.ca](mailto:Bhemmelg@ucalgary.ca)  
32  
33 15 Fatemeh Yazdi, MSc<sup>1</sup> Email: [SabaghYazdiF@smh.ca](mailto:SabaghYazdiF@smh.ca)  
34  
35 16 Jennifer D'Souza, HBSc<sup>1</sup> Email: [jennifer.dsouza@mail.utoronto.ca](mailto:jennifer.dsouza@mail.utoronto.ca)  
36  
37 17 Heather MacDonald, MSc<sup>1</sup> Email: [harmacdonald@gmail.com](mailto:harmacdonald@gmail.com)  
38  
39 18 Andrea C. Tricco, PhD, MSc<sup>1,12,\*</sup> Email: [TriccoA@smh.ca](mailto:TriccoA@smh.ca)  
40  
41  
42  
43  
44  
45  
46  
47

48 **AUTHOR DETAILS**  
49

50  
51 20 <sup>1</sup> Li Ka Shing Knowledge Institute, St. Michael's Hospital, 209 Victoria Street, East Building,  
52  
53 21 Toronto, Ontario, M5B 1W8, Canada  
54  
55  
56  
57  
58  
59  
60

- 1  
2  
3 22 <sup>2</sup> Department of Medicine, University of Toronto, 27 King's College Circle, Toronto, Ontario,  
4  
5 23 M5S 1A1, Canada  
6  
7  
8 24 <sup>3</sup> The Hospital for Sick Children, 555 University Avenue, Toronto, Ontario, M5G 1X8, Canada  
9  
10 25 <sup>4</sup> Department of Paediatrics, University of Toronto, 172 St. George Street, Toronto, Ontario,  
11  
12 26 M5R 0A3, Canada  
13  
14  
15 27 <sup>5</sup> Department of Pharmacology and Toxicology, University of Toronto, Medical Sciences  
16  
17 28 Building, Room 4207, 1 King's College Circle, Toronto, Ontario, M5S 1A8, Canada  
18  
19  
20 29 <sup>6</sup> Institute for Health Policy Management & Evaluation, University of Toronto, 4th Floor,  
21  
22 30 155 College Street, Toronto, Ontario, M5T 3M6, Canada  
23  
24  
25 31 <sup>7</sup> School of Epidemiology, Public Health and Preventive Medicine, Faculty of Medicine,  
26  
27 32 University of Ottawa, Roger-Guindon Building, 451 Smyth Road, Ottawa, Ontario, K1H 8M5,  
28  
29 33 Canada  
30  
31  
32 34 <sup>8</sup> Clinical Epidemiology Program, Ottawa Hospital Research Institute, The Ottawa Hospital,  
33  
34 35 501 Smyth Road, Ottawa, Ontario, K1H 8L6, Canada  
35  
36  
37 36 <sup>9</sup> Institute of Clinical and Evaluative Sciences (ICES uOttawa), 1053 Carling Avenue, Ottawa,  
38  
39 37 Ontario, K1Y 4E9, Canada  
40  
41  
42 38 <sup>10</sup> Ottawa Hospital Research Institute, Center for Practice Changing Research, The Ottawa  
43  
44 39 Hospital-General Campus, 501 Smyth Road, PO Box 201B, Ottawa, Ontario, K1H 8L6,  
45  
46 40 Canada.  
47  
48  
49 41 <sup>11</sup> Departments of Medicine and Community Health Sciences, University of Calgary, TRW  
50  
51 42 Building, 3rd Floor, 3280 Hospital Drive NW, Calgary, Alberta, T2N 4Z6, Canada  
52  
53  
54 43 <sup>12</sup> Epidemiology Division, Dalla Lana School of Public Health, University of Toronto, 6th  
55  
56 44 Floor, 155 College Street, Toronto, Ontario, M5T 3M7, Canada  
57  
58  
59  
60



1  
2  
3 45 **\*Corresponding author**  
4

5  
6 46 Prof. Andrea C. Tricco, PhD  
7

8 47 Scientist, Knowledge Translation Program,  
9

10 48 Li Ka Shing Knowledge Institute, St. Michael's Hospital,  
11

12 49 209 Victoria Street, East Building, Toronto, Ontario, M5B 1W8, Canada  
13

14 50 Phone: 416-864-6060, Fax: 416-864-5805, Email: [TriccoA@smh.ca](mailto:TriccoA@smh.ca)  
15  
16  
17

18 51  
19

20 52 **Keywords:** multiple treatment meta-analysis, knowledge synthesis, epilepsy, pregnancy,  
21  
22 53 infants, developmental delay.  
23

24 54 **Word count:** abstract (300 words); main text (4,000 words); 2 tables; 3 figures; 3  
25  
26 55 additional files; 51 references  
27  
28  
29  
30  
31  
32  
33  
34  
35  
36  
37  
38  
39  
40  
41  
42  
43  
44  
45  
46  
47  
48  
49  
50  
51  
52  
53  
54  
55  
56  
57  
58  
59  
60

1  
2  
3 **56 ABSTRACT**  
4

5  
6 **57 Objectives:** Compare the safety of anti-epileptic drugs (AEDs) on neurodevelopment of  
7  
8  
9 **58** infants/children exposed *in-utero* or during breastfeeding.

10  
11 **59 Design and Setting:** Systematic review and Bayesian random-effects network meta-  
12  
13  
14 **60** analysis (NMA). Medline, EMBASE, and the Cochrane Central Register of Controlled Trials  
15  
16 **61** were searched until April 27<sup>th</sup>, 2017. Screening, data abstraction, and quality appraisal  
17  
18 **62** were completed in duplicate by independent reviewers.

19  
20  
21 **63 Participants:** 29 cohort studies including 5,100 infants/children.

22  
23 **64 Interventions:** Mono- and poly-therapy AEDs including first-generation (carbamazepine,  
24  
25  
26 **65** clobazam, clonazepam, ethosuximide, phenobarbital, phenytoin, primidone, valproate) and  
27  
28 **66** newer-generation (gabapentin, lamotrigine, levetiracetam, oxcarbazepine, topiramate,  
29  
30 **67** vigabatrin) AEDs. Epileptic women who did not receive AEDs during pregnancy or  
31  
32 **68** breastfeeding served as the control group.

33  
34  
35 **69 Primary and secondary Outcome measures:** Cognitive developmental delay and  
36  
37  
38 **70** autism/dyspraxia were primary outcomes. Attention deficit hyperactivity disorder,  
39  
40 **71** language delay, neonatal seizures, psychomotor developmental delay, and social  
41  
42 **72** impairment were secondary outcomes.

43  
44  
45 **73 Results:** The NMA on cognitive developmental delay (11 cohort studies, 933 children, 18  
46  
47 **74** treatments) suggested among all AEDs only valproate was statistically significantly  
48  
49 **75** associated with more children experiencing cognitive developmental delay when compared  
50  
51  
52 **76** with control (odds ratio (OR)=7.40, 95% credible interval (CrI): 3.00-18.46). The NMA on  
53  
54  
55 **77** autism (5 cohort studies, 2,551 children, 12 treatments), suggested that oxcarbazepine  
56  
57 **78** (OR=13.51, CrI: 1.28-221.40), valproate (N=485, OR=17.29, 95% CrI: 2.40-217.60),  
58  
59  
60

1  
2  
3 79 lamotrigine (OR=8.88, CrI: 1.28-112.00), and lamotrigine+valproate (OR=132.70, CrI:  
4  
5  
6 80 7.41-3,851.00) were associated with significantly greater odds of developing autism  
7  
8 81 compared with control. The NMA on Psychomotor developmental delay (11 cohort studies,  
9  
10  
11 82 1,145 children, 18 treatments) found that valproate (OR=4.16, CrI: 2.04-8.75) and  
12  
13 83 carbamazepine+phenobarbital+valproate (OR=19.12, CrI: 1.49-337.50) were associated  
14  
15 84 with significantly greater odds of psychomotor delay compared with control.  
16  
17

18 85 **Conclusions:** Valproate alone or combined with another AED is associated with the  
19  
20 86 greatest odds of adverse neurodevelopmental outcomes compared with control.  
21  
22 87 Oxcarbazepine and lamotrigine were associated with increased occurrence of autism.  
23  
24 88 Counselling is advised for women considering pregnancy to tailor the safest regimen.  
25  
26  
27 89

30 90 **Registration:** PROSPERO database (CRD42014008925).  
31

32 91 **Keywords:** multiple treatment meta-analysis, knowledge synthesis, epilepsy, pregnancy,  
33  
34 92 infants, developmental delay.  
35  
36  
37

## 38 93 **ARTICLE SUMMARY**

### 42 94 **Strengths and limitations of this study**

- 45 95 • 29 cohort studies involving 5,100 children of women who took AEDs were included  
46  
47 in this systematic review. More evidence from long-term follow-up studies is  
48 96 required.  
49  
50 97
- 53 98 • This study was the first that compared and ranked the safety of AEDs, including  
54  
55 99 comparative safety of treatments that have not been directly compared.  
56  
57  
58  
59  
60

1  
2  
3  
4  
5  
6  
7  
8  
9  
10  
11  
12  
13  
14  
15  
16  
17  
18  
19  
20  
21  
22  
23  
24  
25  
26  
27  
28  
29  
30  
31  
32  
33  
34  
35  
36  
37  
38  
39  
40  
41  
42  
43  
44  
45  
46  
47  
48  
49  
50  
51  
52  
53  
54  
55  
56  
57  
58  
59  
60

- 100 • Across all neurological outcomes and treatments compared with control, valproate  
101 alone or combined with another AED is associated with the greatest odds of adverse  
102 development.
- 103 • Oxcarbazepine and lamotrigine were associated with increased occurrence of  
104 autism.

For peer review only

## 105 INTRODUCTION

106 Anti-epileptic drugs (AEDs) are used by pregnant women for various conditions, such as  
107 epilepsy, pain syndromes, psychiatric disorders, and chronic migraine.<sup>1</sup> AED use during  
108 pregnancy is associated with risks to the fetus, as these drugs can cross the placenta or may  
109 be transferred to the infant through breastfeeding and may be associated with adverse  
110 neurodevelopment outcomes.<sup>2-4</sup> Two systematic reviews examined the association  
111 between AED exposure and neurodevelopment *in utero*, and reported that exposure to  
112 valproate was linked to significantly lower IQ scores and poorer overall  
113 neurodevelopmental outcomes in the children of women who used these medications.<sup>5,6</sup> No  
114 significant associations were found between neurodevelopment and exposure to other  
115 AEDs such as carbamazepine, lamotrigine, or phenytoin.<sup>5-8</sup> However, there is a lack of  
116 sufficiently powered studies to assess the impact of AEDs on neurodevelopment in children  
117 of women exposed to these agents, especially for newer generation drugs, thus highlighting  
118 the need for a systematic review.<sup>9,10</sup>

119 The aim of this study was to compare the safety of AEDs and assess their impact on  
120 neurodevelopment in infants and children exposed *in-utero* or during breastfeeding,  
121 employing a systematic review and network meta-analysis (NMA).

## 122 **METHODS**

123 The methods are briefly described here; details can be found in the published protocol  
124 (Additional File 1).<sup>11</sup> This study was registered with PROSPERO (CRD42014008925). We  
125 followed the ISPOR<sup>12</sup> guidelines for our NMA, and reported our findings using the PRISMA  
126 extension for NMA (Additional File 2).<sup>13</sup>

### 127 **Eligibility criteria**

128 All randomized clinical trials (RCTs), quasi-RCTs, and observational studies were eligible.  
129 Included studies assessed infants or children  $\leq 12$  years of age whose mothers consumed  
130 AEDs during pregnancy and/or while breastfeeding. Both mono- and poly-therapy AEDs  
131 were eligible, including first-generation (i.e., carbamazepine, clobazam, clonazepam,  
132 ethosuximide, phenobarbital, phenytoin, primidone, valproate) and newer-generation (i.e.,  
133 marketed >1990: gabapentin, lamotrigine, levetiracetam, oxcarbazepine, topiramate,  
134 vigabatrin), with no restrictions on AED dosage. Placebo, no AED, other AEDs alone or in  
135 combination, were considered as comparators. Duplicate studies that used the same  
136 registry or population sample (i.e., companion studies) were used for supplementary  
137 information only. No language or other restrictions were imposed.

138 The primary neurological outcomes were cognitive developmental delay and  
139 autism/dyspraxia, and the secondary outcomes included attention deficit hyperactivity  
140 disorder (ADHD), language delay, neonatal seizures, psychomotor developmental delay,  
141 and social impairment. Table 2 shows the outcome measures and diagnostic scales used.  
142 We initially intended to evaluate all safety outcomes in infants/ children exposed to AEDs  
143 *in-utero* or during breastfeeding in one publication, but given the breadth of evidence we

1  
2  
3 144 identified, we report results related to risk of major congenital malformations, birth, and  
4  
5 145 prenatal outcomes in a companion paper.<sup>14</sup>  
6  
7

### 8 146 **Information sources**

9  
10 147 An experienced librarian executed search strategies for MEDLINE, EMBASE, and the  
11  
12 148 Cochrane Central Register of Controlled Trials up to March 18, 2014, and then updated the  
13  
14 149 search in April 27<sup>th</sup> 2017. The search strategy for MEDLINE was peer-reviewed by another  
15  
16 150 librarian using the PRESS checklist,<sup>15</sup> and is available in the protocol.<sup>11</sup> Additional studies  
17  
18 151 were identified by scanning references and contacting authors. Unpublished studies were  
19  
20 152 sought by searching clinical trial registries and conference abstracts.  
21  
22  
23

### 24 153 **Study selection and data collection**

25  
26 154 After a calibration exercise, titles/abstracts (level 1) and full-text papers (level 2) were  
27  
28 155 screened by two reviewers independently. Upon completion of level 1, 6% of citations were  
29  
30 156 discrepant between reviewer pairs, whereas at the conclusion of level 2, 16% of articles  
31  
32 157 were discrepant. Conflicts were resolved through discussion or by a third reviewer. The  
33  
34 158 same approach was used for data abstraction and appraisal of methodological quality.  
35  
36 159 Three rounds of pilot testing were conducted prior to data abstraction to train reviewers  
37  
38 160 and refine the data abstraction form. For studies published in the last 10 years, authors  
39  
40 161 were contacted to request clarification or additional data.  
41  
42  
43  
44  
45

### 46 162 **Appraisal of methodological quality**

47  
48 163 Only observational studies were identified and included for analysis, and their  
49  
50 164 methodological quality was appraised with the Newcastle-Ottawa Scale (NOS) (Additional  
51  
52 165 File 3: Appendix A).<sup>16</sup> For each outcome with  $\geq 10$  studies, the comparison-adjusted funnel  
53  
54 166 plot was used to assess small-study effects,<sup>17</sup> where the overall treatment effect for each  
55  
56  
57  
58  
59  
60

1  
2  
3 167 comparison was estimated under the fixed-effect meta-analysis model. All eligible  
4  
5  
6 168 medications were ordered from oldest to newest using their international market approval  
7  
8 169 dates. Hence, the comparison-adjusted funnel plot additionally assesses the hypothesis that  
9  
10  
11 170 newer AEDs are favoured over older ones. To overcome some of the correlations induced  
12  
13 171 by multi-arm studies, which may cause overestimation and mask funnel plot asymmetry,  
14  
15 172 we plotted data points corresponding to the study-specific basic parameters (treatment  
16  
17  
18 173 comparisons with common comparator). In each study, we used the control group as the  
19  
20 174 common comparator or if this was missing, we used the oldest treatment comparator  
21  
22  
23 175 against the remaining AEDs.

### 24 25 176 **Synthesis of included studies**

26  
27 177 We used the odds ratio (OR) for each dichotomous outcome, and outcome data were  
28  
29  
30 178 pooled using hierarchical meta-analysis and NMA models and the Markov Chain Monte  
31  
32 179 Carlo sampling method in a Bayesian framework. To account for anticipated  
33  
34  
35 180 methodological and clinical heterogeneity across studies, and to achieve the highest  
36  
37 181 generalizability in the meta-analytical treatment effects, we applied a random-effects  
38  
39 182 model.<sup>18</sup>  
40  
41  
42 183 A NMA was applied for connected evidence networks and pre-specified treatment nodes.<sup>19</sup>  
43  
44 184 We assessed the transitivity assumption for each outcome *a priori* using the effect  
45  
46 185 modifiers: age, baseline risk, treatment indication, timing, and methodological quality. The  
47  
48 186 mean of each continuous effect modifier and the mode of each categorical effect modifier  
49  
50  
51 187 for each pairwise comparison were presented in tables for each outcome.<sup>20</sup> The consistency  
52  
53  
54 188 assumption was evaluated for the entire network of each outcome using the random-  
55  
56 189 effects design-by-treatment interaction model when multiple studies were available in  
57  
58  
59  
60



1  
2  
3 190 each network design or the fixed-effect design-by-treatment interaction model when a  
4  
5  
6 191 single study informed each network design.<sup>21</sup> If inconsistency was identified, further  
7  
8 192 examination for local inconsistency in parts of the network was completed using the loop-  
9  
10 193 specific method.<sup>22 23</sup> Common within-network between-study variance ( $\tau^2$ ) across  
11  
12 194 treatment comparisons was assumed in the meta-analysis, NMA, and design-by-treatment  
13  
14 195 interaction model, so that treatment comparisons including a single study can borrow  
15  
16 196 strength from the remaining network. This assumption was clinically reasonable, as the  
17  
18 197 treatments included were of the same nature. In the loop-specific approach, common  
19  
20 198 within-loop  $\tau^2$  was assumed.

21  
22 199 For cognitive developmental delay and autism/dyspraxia outcomes, network meta-  
23  
24 200 regression analyses for maternal age and baseline risk (i.e., using the control group) were  
25  
26 201 conducted, when  $\geq 10$  studies provided relevant information, assuming a common fixed  
27  
28 202 coefficient across treatment comparisons for AEDs vs. control. Sensitivity analyses for  
29  
30 203 cognitive developmental delay and autism/dyspraxia outcomes were performed for  
31  
32 204 treatment indication of epilepsy, large study size (i.e.,  $>300$ ), maternal alcohol intake,  
33  
34 205 maternal tobacco use, only first-generation AEDs, and methodological quality. The  
35  
36 206 sensitivity analysis for methodological quality was restricted to studies with low risk of  
37  
38 207 bias for the two items on the NOS where the greatest proportion of studies received a low-  
39  
40 208 quality score: adequacy of follow-up of cohorts and comparability of cohorts. For  
41  
42 209 autism/dyspraxia, a sensitivity analysis on maternal IQ/psychiatric history was  
43  
44 210 additionally conducted. We measured the goodness of fit using the posterior mean of the  
45  
46 211 residual deviance, the degree of  $\tau^2$ , and the deviance information criterion (DIC). In a well-  
47  
48 212 fitting model the posterior mean residual deviance should be close to the number of data  
49  
50  
51  
52  
53  
54  
55  
56  
57  
58  
59  
60

1  
2  
3 213 points.<sup>24 25</sup> A difference of 3 units in the DIC between a NMA and a network meta-  
4  
5  
6 214 regression model was considered important and the lowest value of the DIC corresponded  
7  
8 215 to the model with the best fit.<sup>24 25</sup>  
9  
10 216 All analyses were conducted in OpenBUGS<sup>26</sup> assuming non-informative priors for all model  
11  
12 217 parameters, and  $\tau \sim N(0,1)$ ,  $\tau > 0$ . The first 10,000 iterations were discarded and then  
13  
14 218 100,000 simulations were run with thinning of 10 values. Convergence was checked by  
15  
16 219 visual inspection of the evaluation of the mixing of two chains. The median and 95% CrI  
17  
18 220 were calculated for each parameter value. The *network* command<sup>27</sup> was used to apply the  
19  
20 221 design-by-treatment interaction model.  
21  
22 222 For NMA estimates, a 95% predictive interval (PrI) is also reported to capture the  
23  
24 223 magnitude of  $\tau^2$  and present the interval within which the treatment effect of a future  
25  
26 224 study is expected to lie.<sup>28 29</sup> The estimated safety of the included AEDs was ranked using the  
27  
28 225 surface under the cumulative ranking (SUCRA) curve.<sup>30</sup> The larger the SUCRA for a  
29  
30 226 treatment, the higher its safety rank among all the available treatment options. SUCRA  
31  
32 227 values are presented along with 95% CrIs to capture the uncertainty in the parameter  
33  
34 228 values.<sup>31</sup>  
35  
36  
37  
38  
39  
40  
41  
42  
43  
44  
45  
46  
47  
48  
49  
50  
51  
52  
53  
54  
55  
56  
57  
58  
59  
60

## 229 **RESULTS**

### 230 **Literature search and included studies**

231 Our literature search identified 5,707 titles and abstracts, which after the screening process  
232 yielded 681 articles potentially relevant for inclusion (Figure 1). After full-text review, 95  
233 studies fulfilled eligibility criteria along with 17 studies identified through supplemental  
234 methods. Of the 112 total eligible studies in the complete review,<sup>14</sup> 29 articles with seven  
235 companion reports and two potentially overlapping registry studies included one or more  
236 relevant neurological outcomes (Additional File 3: Appendix B). Four of the studies  
237 included in this analysis were conference abstracts with usable data,<sup>32-35</sup> and four  
238 studies,<sup>36-39</sup> not captured in the original literature search, were identified through  
239 reference scanning. A table with the key excluded studies and a rationale for their exclusion  
240 is presented in Additional File 3: Appendix C.

### 241 **Study and patient characteristics**

242 We included 29 cohort studies (5,100 patients) published between 1989 and 2016 (Table  
243 1; Additional File 3: Appendix D, E). The number of patients included in each study ranged  
244 from 23 to 2,011 (median 74.5). Most studies (76%) were published after 2000, 62% of the  
245 studies included fewer than 100 patients, and the 52% of the studies included a control  
246 group of pregnant/breastfeeding women with epilepsy who did not receive AEDs. The  
247 mean maternal age ranged from 24 to 34 years. About half of the studies (52%) were  
248 funded through government/public research funding.

### 249 **Methodological quality results**

250 Twenty-nine observational studies were appraised using the NOS (Additional File 3:  
251 Appendix F). Overall, the studies were of good methodological quality and were rated as

1  
2  
3 252 high quality across most items: 28 studies (97%) selected the non-exposed cohort from the  
4  
5 253 same community as the exposed cohort, 26 (90%) included a representative or somewhat  
6  
7  
8 254 representative sample, 27 (93%) assessed outcomes independently, with blinding, or via a  
9  
10 255 record linkage (e.g., identified through database records), and 23 (79%) ascertained  
11  
12 256 exposure via secured records (e.g., database records) or structured interviews. The  
13  
14 257 comparability of cohorts and adequacy of follow-up were the lowest scoring items across  
15  
16 258 the studies with only 12 (41%) and 10 (34%) studies rated as high quality on these items.  
17  
18 259 No evidence for small-study effects was identified by the visual inspection of the  
19  
20 260 comparison-adjusted funnel plots (Additional File 3: Appendix G).  
21  
22  
23  
24

### 25 261 **Statistical analysis results**

26  
27 262 No important concerns were raised regarding the violation of the transitivity assumption  
28  
29 263 when maternal age, baseline risk, treatment indication, and timing were assessed  
30  
31 264 (Additional File 3: Appendix H). However, the average methodological quality appraisal  
32  
33 265 across treatment comparisons varied across treatment comparisons. The evaluation of the  
34  
35 266 consistency assumption using the design-by-treatment interaction model suggested that  
36  
37 267 there was no evidence of significant inconsistency across all outcomes (Additional File 3:  
38  
39 268 Appendix H).  
40  
41  
42  
43

44 269 In the following sections, we present the significant NMA results by outcome for AEDs  
45  
46 270 compared with control (i.e., no exposure to AEDs), while the SUCRA values from all  
47  
48 271 outcomes are presented in Figure 2 and depicted in a rank-heat plot (<http://rh.ktss.ca/>)<sup>40</sup>  
49  
50 272 in Additional File 3: Appendix I.  
51  
52  
53

### 54 273 **Cognitive developmental delay**

1  
2  
3 274 The NMA for cognitive developmental delay (definitions in Table 1) included 11 cohort  
4  
5  
6 275 studies, 933 children, and examined 18 treatments (Figure 3a; Additional File 3: Appendix  
7  
8 276 J;  $\tau^2=0.12$ , 95% CrI: 0.00-1.15). One study included children exposed to AEDs both *in-utero*  
9  
10 277 and through breastfeeding, and ten included children exposed to AEDs *in-utero*. Across all  
11  
12 278 AEDs, only valproate was associated with significantly increased odds of cognitive  
13  
14 279 developmental delay when compared with control (odds ratio (OR)=7.40, 95% credible  
15  
16 280 interval (CrI): 3.00-18.46; Figure 2a; Additional File 3: Appendix H).

17  
18 281 The same results were observed in a network meta-regression of baseline risk for offspring  
19  
20 282 of women with epilepsy who were not exposed to AEDs (estimated regression coefficient  
21  
22 283 on OR scale: 1.01, 95% CrI: 0.76-1.56;  $\tau^2=0.16$ , 95% CrI: 0.00-1.24; residual deviance=  
23  
24 284 45.27, data points= 47, DIC= 80.17). Similarly, the sensitivity analyses restricted to: a)  
25  
26 285 studies that only included women receiving AEDs to treat epilepsy (10 studies, 910  
27  
28 286 children, 17 treatments;  $\tau^2=0.16$ , 95% CrI: 0.00-1.36), b) studies comparing only first-  
29  
30 287 generation AEDs (6 studies, 480 children, 13 treatments;  $\tau^2=0.28$ , 95% CrI: 0.00-2.97), c)  
31  
32 288 studies that reported maternal alcohol or tobacco use (3 studies, 504 children, 7  
33  
34 289 treatments;  $\tau^2=0.27$ , 95% CrI: 0.00-3.29), and d) studies with high methodological quality  
35  
36 290 on NOS item 'comparability of cohorts' (3 studies, 366 children, 7 treatments;  $\tau^2=0.38$ , 95%  
37  
38 291 CrI: 0.00-4.14), were consistent with the NMA results (Additional File 3: Appendix K). The  
39  
40 292 sensitivity analysis with studies of high methodological quality on the NOS item 'adequacy  
41  
42 293 of follow-up' found no statistically significant results (4 studies, 283 patients, 12  
43  
44 294 treatments;  $\tau^2=1.01$ , 95% CrI: 0.01-5.85; Additional File 3: Appendix K).

## 53 295 **Autism/dyspraxia**

54  
55  
56  
57  
58  
59  
60

1  
2  
3 296 The NMA on autism/dyspraxia (definitions in Table 1) included five cohort studies, 2,551  
4  
5  
6 297 children exposed *in utero*, and examined 12 treatments ( $\tau^2=0.16$ , 95% CrI: 0.00-1.95;  
7  
8 298 Figure 3b; Additional File 3: Appendix H). Compared with control, only valproate  
9  
10 299 (OR=17.29, 95% CrI: 2.40-217.60), oxcarbazepine (OR= 13.51, 95% CrI: 1.28-221.40),  
11  
12 300 lamotrigine (OR= 8.88, 95% CrI: 1.28-112.00), and lamotrigine+valproate (OR=132.70,  
13  
14 301 95% CrI: 7.41-3851.00) were significantly associated with increased occurrence of  
15  
16 302 autism/dyspraxia (Figure 2b).  
17  
18 303 Restricting the NMA to studies including only women with epilepsy as their treatment  
19  
20 304 indication produced results that were generally in agreement with the NMA results, except  
21  
22 305 that oxcarbazepine was no longer in the network (4 cohort studies, 540 children, 10  
23  
24 306 treatments;  $\tau^2=0.31$ , 95% CrI: 0.00-304). Two cohort studies of 404 offspring of women  
25  
26 307 with a history of tobacco use compared 4 treatments and found similar results except that  
27  
28 308 oxcarbazepine and lamotrigine+valproate were no longer in the network ( $\tau^2=0.39$ , 95%  
29  
30 309 CrI: 0.00-4.47). The results were in agreement in sensitivity analyses including only higher  
31  
32 310 methodological quality studies in the 'comparability of cohorts' item on the NOS (4 studies,  
33  
34 311 2,395 children, 12 treatments;  $\tau^2=0.19$ , 95% CrI: 0.00-2.43) and the 'adequacy of follow-up  
35  
36 312 of cohorts' (3 studies, 2244 children, 10 treatments;  $\tau^2=0.23$ , 95% CrI: 0.00-2.88), except  
37  
38 313 that lamotrigine was no longer statistically significant than control for the latter  
39  
40 314 (Additional File 3: Appendix K).  
41  
42  
43  
44  
45  
46  
47  
48

### 315 **Neonatal Seizure**

51 316 One cohort study included 72 children who were exposed to AEDs *in-utero* as well as  
52  
53 317 through breastfeeding reported on the incidence of neonatal seizures. The study compared  
54  
55  
56  
57  
58  
59  
60

1  
2  
3 318 valproate against lamotrigine and found no significant difference in neonatal seizures  
4  
5  
6 319 between the two drugs (OR=0.18, 95% CI: 0.01-3.70).  
7

### 8 320 **Psychomotor developmental delay**

9  
10 321 The NMA on psychomotor developmental delay (definitions in Table 1) included 11 cohort  
11  
12 322 studies, 1,145 children exposed *in utero*, and examined 18 treatments ( $\tau^2=0.06$ , 95% CrI:  
13  
14 323 0.00-0.63; Figure 3c; Additional File 3: Appendices H, J). Valproate (OR=4.16, 95% CrI:  
15  
16 324 2.04-8.75) and carbamazepine+phenobarbital+valproate (OR=19.12, 95% CrI: 1.49-  
17  
18 325 337.50) were significantly more harmful than control (Figure 2c).  
19  
20  
21

### 22 326 **Language delay**

23  
24  
25 327 The NMA on language delay (definitions in Table 1) included five cohort studies, 509  
26  
27 328 children, and examined five treatments ( $\tau^2=0.16$ , 95% CrI: 0.00-2.15; Figure 3d; Additional  
28  
29 329 File 3: Appendices H, J). One study included children exposed to AEDs *in-utero* and through  
30  
31 330 breastfeeding, and four included children exposed to AEDs *in-utero*. Compared with  
32  
33 331 control, valproate was the only treatment significantly associated with increased odds of  
34  
35 332 language delay (OR=7.95, 95% CrI: 1.50-49.13; Figure 2d).  
36  
37  
38

### 39 333 **Attention deficit hyperactivity disorder**

40  
41  
42 334 The NMA on ADHD (definitions in Table 1) included five cohort studies, 816 children, and  
43  
44 335 examined seven treatments ( $\tau^2=0.11$ , 95% CrI: 0.00-1.29). One study included children  
45  
46 336 exposed to AEDs *in-utero* and through breastfeeding, while four studies included children  
47  
48 337 exposed to AEDs *in-utero*. None of the treatment comparisons reached statistical  
49  
50 338 significance (Figure 3e; Figure 2e; Additional File 3: Appendices H, J).  
51  
52

### 53 339 **Social Impairment**

1  
2  
3 340 One cohort study included 422 children exposed to AEDs *in-utero* as well as through  
4  
5  
6 341 breastfeeding. The children were exposed to carbamazepine (n=48), lamotrigine (n=71),  
7  
8 342 valproate (n=27) and control (n=278). No significant differences in social impairment were  
9  
10 343 identified.<sup>41</sup>  
11  
12  
13 344

For peer review only



## DISCUSSION

Our results suggest that AEDs generally pose a risk for infants and children exposed *in-utero* or during breastfeeding. Valproate was significantly associated with more children experiencing autism/dyspraxia, language, cognitive and psychomotor developmental delays versus children who were not exposed to AEDs. Oxcarbazepine, lamotrigine and lamotrigine+valproate were associated with increased occurrence of autism/dyspraxia, whereas for the cognitive developmental delay and psychomotor developmental delay outcomes, children exposed to the combination of carbamazepine, phenobarbital, and valproate were at greater odds of harm than those who were not exposed to AEDs. However, these results should be interpreted with caution, as a number of factors (e.g., anticonvulsant dosing, severity of epilepsy, duration of exposure, serum concentrations of exposure, mother's IQ/education) that may all influence outcomes were not identified in these studies. Also, our subsequent analyses may be underpowered due to missing data (e.g., 17 of the 27 studies did not report maternal age, 23 of 27 studies did not report alcohol use, 22 of 27 studies did not report tobacco use, and 14 of 27 studies did not include control group).

NMA is a particularly useful tool for decision-makers because it allows the ranking of treatments for each outcome. However, the results of our SUCRA curves should be interpreted with caution, especially due to the small number of studies and children included in each NMA, which is also reflected in the high uncertainty around the SUCRA values (Figure 2).<sup>31</sup>

Our results are consistent with a longitudinal study of 311 children that found exposure to lamotrigine was associated with significantly higher IQ scores and verbal function at six

1  
2  
3 368 years of age compared to children exposed to valproate (Additional File 3: Appendix C).<sup>7</sup> As  
4  
5  
6 369 indicated in Additional File 3: Appendix C, we were unable to include this study because the  
7  
8 370 outcome was reported as a continuous measure, where we focused on dichotomous  
9  
10 371 outcomes to facilitate interpretation. Our results are supported by findings from a cohort  
11  
12 372 study, which found that children exposed to levetiracetam were not at increased risk for  
13  
14 373 delayed development compared to unexposed children (Additional File 3: Appendix C).<sup>42</sup>  
15  
16 374 As indicated in Additional File 3: Appendix C, we were unable to include this study due to  
17  
18 375 the same reason as above. A NMA of 195 RCTs (including 28,013 both male and female  
19  
20 376 patients) showed that gabapentin and levetiracetam showed the best tolerability profile  
21  
22 377 compared with other AEDs, whereas oxcarbazepine and topiramate had a higher  
23  
24 378 withdrawal rate, and lamotrigine an intermediate withdrawal rate.<sup>43</sup>  
25  
26 379 Across all outcomes, valproate alone or combined with another AED (even with a newer-  
27  
28 380 generation agent, e.g., lamotrigine) was associated with the greatest odds. Similarly, two  
29  
30 381 previous systematic reviews that did not conduct a NMA found valproate was associated  
31  
32 382 with significantly lower IQ scores and poorer overall neurodevelopmental outcomes when  
33  
34 383 compared to an unexposed control group.<sup>5 6</sup> Also consistent with our results, a 2014  
35  
36 384 Cochrane review including 28 studies (10 of these studies were included in the meta-  
37  
38 385 analyses; with a maximum number of five studies per meta-analysis) concluded that AED  
39  
40 386 polytherapy led to poorer developmental outcomes and IQ compared to healthy controls,  
41  
42 387 epileptic controls, and unspecified monotherapy.<sup>5</sup> This Cochrane review also concluded  
43  
44 388 that insufficient data exist for newer AEDs. However, unlike our review, it included and  
45  
46 389 analysed fewer studies, and did not differentiate between specific polytherapy regimens,  
47  
48 390 and thus did not compare these regimens versus each other or specific monotherapy AEDs.  
49  
50  
51  
52  
53  
54  
55  
56  
57  
58  
59  
60

1  
2  
3 391 These risks must be balanced with the need to control seizure activity in pregnancy and  
4  
5  
6 392 thus informed decision-making by patients and clinicians is critical.  
7  
8 393 Strengths of our study include a comprehensive systematic review methodology that  
9  
10 394 followed the Cochrane Handbook<sup>44</sup> and ISPOR<sup>12</sup> guidelines, and reported using the PRISMA  
11  
12 395 extension for NMA.<sup>13</sup> To the best of our knowledge, our study was the first that compared  
13  
14 396 and ranked the safety of AEDs. We evaluated the comparative safety of treatments that  
15  
16 397 have not been directly compared head-to-head before. In addition, we calculated predictive  
17  
18 398 intervals, which account for between-study variation and provide a predicted range for the  
19  
20 399 treatment effect estimate, should a future study be conducted. On average, the predictive  
21  
22 400 intervals suggested that our results are robust.  
23  
24  
25 401 Our systematic review has a few limitations worth noting. First, due to the complexity of  
26  
27 402 the data and the studies' underreporting, differences in drug dosages could not be  
28  
29 403 accounted for, and it was assumed that different dosages of the same AED were equally  
30  
31 404 effective. When a study reported multiple dosages for the same treatment, we combined  
32  
33 405 the data for this treatment. This is common for cohort studies, which report on a number of  
34  
35 406 different types of exposures amongst patients. Second, several polytherapies had high  
36  
37 407 SUCRA estimates but very wide CrIs, which is due to the small number of studies included  
38  
39 408 for each drug combination with underpowered sample sizes. Evidence suggests that  
40  
41 409 ranking probabilities for a treatment of being the best may be biased toward the  
42  
43 410 treatments with the smallest number of studies, which may have influenced our SUCRA  
44  
45 411 results.<sup>31 45</sup> As such, the effect sizes need to be taken into account when considering the  
46  
47 412 SUCRA values. Third, due to the absence of evidence from RCTs, our conclusions were  
48  
49 413 based on evidence from observational studies only, and inherent biases because of  
50  
51  
52  
53  
54  
55  
56  
57  
58  
59  
60

1  
2  
3 414 confounding and shortcomings of these studies may have impacted our findings. For  
4  
5  
6 415 example, the included studies often failed to report important confounding variables,<sup>46</sup>  
7  
8 416 such as family history of autism, ADHD, and maternal IQ, severity of epilepsy making it  
9  
10 417 impossible for us to control these variables through subgroup analysis and meta-  
11  
12 418 regression. Recent research has explored methods to incorporate non-randomized with  
13  
14 419 randomized evidence in a NMA and have highlighted the need to carefully explore the level  
15  
16 420 of confidence in the non-randomized evidence.<sup>47 48</sup> The use of observational studies allows  
17  
18 421 the assessment of the safety profile of AED treatments and offers the opportunity to  
19  
20 422 evaluate effects in pregnancy.<sup>49</sup> Future large-scale observational studies are needed to  
21  
22 423 allow the evaluation of rare adverse events that otherwise cannot be adequately evaluated  
23  
24 424 in RCTs, especially during pregnancy. Fourth, although no intransitivity for most effect  
25  
26 425 modifiers assessed was evident, there was an imbalance in the methodological study  
27  
28 426 quality appraisal across treatment comparisons and most outcomes, which may impact our  
29  
30 427 results. Unknown factors or factors that could not be assessed due to dearth of data may  
31  
32 428 pose the risk of residual confounding bias, and hence risk the validity of the transitivity  
33  
34 429 assumption. However, the assessment of consistency suggested no disagreement between  
35  
36 430 the different sources of evidence in the network. Fifth, although the tendency towards  
37  
38 431 small-study effects is greater with observational studies than with randomized trials,<sup>50</sup> the  
39  
40 432 assessment of small-study effects using adjusted funnel plots suggested no evidence for  
41  
42 433 their prevalence. Also, the majority of the included studies in this review compared  
43  
44 434 multiple treatments inducing correlations in each funnel plot, which may mask asymmetry.  
45  
46 435 Although we plotted data points corresponding to the study-specific basic parameters to  
47  
48 436 reduce correlations, this issue may still exist. Sixth, we were unable to conduct subgroup  
49  
50  
51  
52  
53  
54  
55  
56  
57  
58  
59  
60

1  
2  
3 437 analysis by type of exposure (breastfeeding versus *in utero*) due to the small number of  
4  
5  
6 438 studies included in the NMA and due to the poor reporting; 22 studies did not report  
7  
8 439 whether exposure was also in breastfeeding (additional to *in utero*). Hence, we included all  
9  
10 440 studies in the analysis irrespective of the type of exposure.

11  
12  
13 441 More evidence from long-term follow-up studies is required to further delineate  
14  
15 442 neurodevelopmental risks in children. Future studies should assess the genetic  
16  
17  
18 443 contribution from the biological father, maternal seizures during pregnancy, exposure  
19  
20 444 through breastfeeding only, types of epilepsy, and maternal family history. Registries  
21  
22 445 should aim to include a suitable control group and collect information on potential  
23  
24  
25 446 confounders, such as alcohol and tobacco use, allowing researchers to identify the safest  
26  
27  
28 447 agents for different patient-level covariates, and enhance decision-making for healthcare  
29  
30 448 providers and patients. A critical evaluation of the validity of the control group is also  
31  
32 449 necessary, in order to examine potential differences between the treated and the not  
33  
34  
35 450 treated populations. An individual patient data NMA would likely provide further clarity to  
36  
37 451 the field, which allows the tailoring of management to specific patient characteristics.<sup>51</sup>

## 38 39 452 **CONCLUSION**

40  
41  
42 453 Across all outcomes and treatments compared with control, valproate alone or combined  
43  
44 454 with another AED was associated with the greatest odds, whereas oxcarbazepine and  
45  
46  
47 455 lamotrigine were associated with increased occurrence of autism. Counselling is advised  
48  
49 456 for women considering pregnancy to tailor the safest regimen.  
50  
51  
52  
53  
54  
55  
56  
57  
58  
59  
60

1  
2  
3 457 **LIST OF ABBREVIATIONS**

4  
5  
6 458 AEDs: Anti-epileptic drugs; CrI: Credible interval; NMA: Network Meta-analysis; OR: Odds  
7  
8 459 ratio; PrI: Predictive interval; SUCRA curve: Surface under the cumulative ranking curve

9  
10  
11 460 **ADDITIONAL FILES**

12  
13  
14 461 **Additional File 1: Protocol**

15  
16  
17 462 **Additional File 2: PRISMA NMA Checklist**

18  
19  
20 463 **Additional File 3: Supplementary Online Content (Appendices A-O)**

21  
22  
23 464 Appendix A. Newcastle-Ottawa Scale scoring guide

24  
25 465 Appendix B. List of included studies

26  
27 466 Appendix C. Key Excluded Studies

28  
29 467 Appendix D. Table of Individual Study Characteristics

30  
31 468 Appendix E. Table of Patient Characteristics

32  
33 469 Appendix F. Methodological quality of observational studies – Newcastle Ottawa Scale

34  
35 470 Appendix G. Comparison-adjusted funnel plots

36  
37 471 Appendix H. Statistically significant network meta-analysis results along with meta-  
38 472 analysis results, transitivity, and inconsistency assessments

39  
40 473 Appendix I. Rank-heat plot of cognitive developmental delay, autism/dyspraxia,  
41  
42 474 psychomotor developmental delay, language delay, and attention deficit hyperactivity  
43  
44 475 disorder outcomes

45  
46 476 Appendix J. Number of studies and treatments per outcome

47  
48 477 Appendix K. Sensitivity and network meta-regression analyses - Anti-epileptic drugs  
49  
50 478 compared with Control

1  
2  
3 479 **FIGURE LEGENDS**

4  
5  
6 480 **Figure 1. Study flow diagram**

7  
8  
9  
10 481 **Figure 2. Forest plots for cognitive developmental delay, autism/dyspraxia,**  
11  
12 482 **psychomotor developmental delay, language delay, and attention deficit**  
13  
14 483 **hyperactivity disorder outcome**

15  
16  
17  
18 484 **Figure 3. Network diagrams for cognitive developmental delay, autism/dyspraxia,**  
19  
20 485 **psychomotor developmental delay, language delay, and attention deficit**  
21  
22 486 **hyperactivity disorder outcomes**

23  
24  
25 487 *Each treatment node is weighted according to the number of patients that have received the*  
26  
27 488 *particular treatment, and each edge is weighted according to the number of studies*  
28  
29 489 *comparing the treatments it connects.*

30  
31  
32 490 *Abbreviations: carbam - carbamazepine, clobaz - clobazam, clonaz - clonazepam, ethos -*  
33  
34 491 *ethosuximide, gabap - gabapentin, lamot - lamotrigine, levet - levetiracetam, oxcar -*  
35  
36 492 *oxcarbazepine, pheno - phenobarbital, pheny - phenytoin, primid - primidone, topir -*  
37  
38 493 *topiramate, valpro - valproate, vigab - vigabatrin*

1  
2  
3 494 **DECLARATIONS**

5  
6 495 **CONTRIBUTORS**

7  
8 496 AAV analysed the data, interpreted the results, and drafted the manuscript. ACT and SES  
9  
10 497 conceived and designed the study, helped obtain funding, interpreted the results, and  
11  
12 498 helped write sections of the manuscript. PR and EC coordinated the review, screened  
13  
14 499 citations and full-text articles, abstracted data, appraised quality, resolved discrepancies,  
15  
16 500 contacted authors, and edited the manuscript. CS provided methodological support and  
17  
18 501 screened citations and full-text articles and edited the manuscript. RK, ER, FY, JDS, KT, and  
19  
20 502 HM screened citations and full-text articles, abstracted data, and/or appraised quality. BH,  
21  
22 503 BRH and YF helped conceive the study and edited the manuscript. All authors read and  
23  
24 504 approved the final manuscript.

25  
26  
27  
28  
29 505 **ACKNOWLEDGEMENTS**

30  
31 506 We thank Dr. David Moher for providing his feedback on our protocol. We thank Dr. Laure  
32  
33 507 Perrier for conducting the literature searches, Becky Skidmore for peer-reviewing the  
34  
35 508 MEDLINE search, and Alissa Epworth for obtaining the full-text articles. We thank Alistair  
36  
37 509 Scott, Wing Hui, and Geetha Sanmugalingham for screening some of the citations and/or  
38  
39 510 abstracting some of the data for a few of the included studies, Misty Pratt and Mona  
40  
41 511 Ghannad for helping scan reference lists, and Ana Guzman, Susan Le, and Inthuja  
42  
43 512 Selvaratnam for contacting authors and formatting the manuscript.

44  
45  
46  
47  
48 513 **FUNDING**

49  
50 514 This systematic review was funded by the Canadian Institutes for Health Research/Drug  
51  
52 515 Safety and Effectiveness Network (CIHR/DSEN). AAV is funded by the Banting Postdoctoral  
53  
54 516 Fellowship Program from the CIHR. SES is funded by a Tier 1 Canada Research Chair in  
55  
56  
57  
58  
59  
60



1  
2  
3 517 Knowledge Translation. BH is funded by a CIHR/DSEN New Investigator Award in  
4  
5  
6 518 Knowledge Synthesis. BRH receives funding from the Alberta Heritage Foundation for  
7  
8 519 Medical Research. ACT is funded by a Tier 2 Canada Research Chair in Knowledge  
9  
10 520 Synthesis. The funder had no role in the design and conduct of the study; collection,  
11  
12 521 management, analysis, and interpretation of the data; preparation, review, or approval of  
13  
14 522 the manuscript; or decision to submit the manuscript for publication.  
15  
16

17  
18 523 **COMPETING INTERESTS**  
19

20 524 None declared.  
21

22 525 **ETHICS APPROVAL**  
23

24 526 Not applicable.  
25  
26

27 527 **PROVENANCE AND PEER REVIEW**  
28

29 528 Not commissioned; externally peer reviewed.  
30  
31

32 529 **DATA SHARING STATEMENT**  
33

34 530 All datasets generated and/or analysed during the current study are available from the  
35  
36 531 corresponding author on reasonable request.  
37  
38

39 532 **OPEN ACCESS**  
40

41 533 This is an Open Access article distributed in accordance with the Creative Commons  
42  
43 534 Attribution Non Commercial (CC BY-NC 4.0) license, which permits others to distribute,  
44  
45 535 remix, adapt, build upon this work non-commercially, and license their derivative works on  
46  
47 536 different terms, provided the original work is properly cited and the use is non-  
48  
49 537 commercial. See: <http://creativecommons.org/licenses/by-nc/4.0/>.  
50  
51  
52  
53  
54  
55  
56  
57  
58  
59  
60

## 538 REFERENCES

- 539 1. Spina E, Perugi G. Antiepileptic drugs: indications other than epilepsy. *Epileptic Disord.* 2004;6(2):57-75.
- 540 541 2. Harden CL, Pennell PB, Koppel BS, et al. Management issues for women with epilepsy--focus  
542 on pregnancy (an evidence-based review): III. vitamin K, folic acid, blood levels, and breast-feeding:  
543 report of the quality standards subcommittee and therapeutics and technology assessment  
544 subcommittee of the American Academy of Neurology and the American Epilepsy Society. *Epilepsia.*  
545 2009;50(5):1247-55.
- 546 3. Samren EB, van Duijn CM, Koch S, et al. Maternal use of antiepileptic drugs and the risk of  
547 major congenital malformations: a joint European prospective study of human teratogenesis  
548 associated with maternal epilepsy. *Epilepsia.* 1997;38(9):981-90.
- 549 4. Meador K, Reynolds MW, Crean S, Fahrbach K, Probst C. Pregnancy outcomes in women  
550 with epilepsy: a systematic review and meta-analysis of published pregnancy registries and  
551 cohorts. *Epilepsy Res.* 2008;81(1):1-13.
- 552 5. Bromley R, Weston J, Adab N, et al. Treatment for epilepsy in pregnancy:  
553 neurodevelopmental outcomes in the child. *The Cochrane database of systematic reviews.*  
554 2014(10):Cd010236.
- 555 6. Banach R, Boskovic R, Einarson T, Koren G. Long-term developmental outcome of children  
556 of women with epilepsy, unexposed or exposed prenatally to antiepileptic drugs: a meta-analysis of  
557 cohort studies. *Drug Saf.* 2010;33(1):73-9.
- 558 7. Meador KJ, Baker GA, Browning N, et al. Fetal antiepileptic drug exposure and cognitive  
559 outcomes at age 6 years (NEAD study): a prospective observational study. *Lancet Neurol.*  
560 2013;12(3):244-52.
- 561 8. Christensen J, Gronborg TK, Sorensen MJ, et al. Prenatal valproate exposure and risk of  
562 autism spectrum disorders and childhood autism. *JAMA.* 2013;309(16):1696-703.
- 563 9. Wlodarczyk BJ, Palacios AM, George TM, Finnell RH. Antiepileptic drugs and pregnancy  
564 outcomes. *Am J Med Genet A.* 2012;158a(8):2071-90.
- 565 10. Velez-Ruiz NJ, Meador KJ. Neurodevelopmental effects of fetal antiepileptic drug exposure.  
566 *Drug Saf.* 2015;38(3):271-8.
- 567 11. Tricco AC, Cogo E, Angeliki VA, et al. Comparative safety of anti-epileptic drugs among  
568 infants and children exposed in utero or during breastfeeding: protocol for a systematic review and  
569 network meta-analysis. *Systematic reviews.* 2014;3:68.
- 570 12. Jansen JP, Trikalinos T, Cappelleri JC, et al. Indirect treatment comparison/network meta-  
571 analysis study questionnaire to assess relevance and credibility to inform health care decision  
572 making: an ISPOR-AMCP-NPC Good Practice Task Force report. *Value Health.* 2014;17(2):157-73.
- 573 13. Hutton B, Salanti G, Caldwell DM, et al. The PRISMA extension statement for reporting of  
574 systematic reviews incorporating network meta-analyses of health care interventions: checklist and  
575 explanations. *Ann Intern Med.* 2015;162(11):777-84.
- 576 14. Veroniki AA, Cogo E, Rios P, et al. Comparative safety of anti-epileptic drugs during  
577 pregnancy: a systematic review and network meta-analysis of congenital malformations and  
578 prenatal outcomes. *BMC Med.* 2017;15(1):95.
- 579 15. McGowan J, Sampson M, Salzwedel DM, Cogo E, Foerster V, Lefebvre C. PRESS Peer Review  
580 of Electronic Search Strategies: 2015 Guideline Statement. *J Clin Epidemiol.* 2016;75:40-6.
- 581 16. Wells G, Shea B, O'Connell D, et al. The Newcastle-Ottawa Scale (NOS) for assessing the  
582 quality of nonrandomised studies in meta-analyses2000. Available from:  
583 [http://www.ohri.ca/programs/clinical\\_epidemiology/oxford.asp](http://www.ohri.ca/programs/clinical_epidemiology/oxford.asp).

- 1  
2  
3 584 17. Chaimani A, Higgins JP, Mavridis D, Spyridonos P, Salanti G. Graphical tools for network  
4 585 meta-analysis in STATA. *PLoS One*. 2013;8(10):e76654.
- 5 586 18. Furukawa TA, Guyatt GH, Griffith LE. Can we individualize the 'number needed to treat'? An  
6 587 empirical study of summary effect measures in meta-analyses. *Int J Epidemiol*. 2002;31(1):72-6.
- 7 588 19. Lu G, Ades AE. Combination of direct and indirect evidence in mixed treatment  
8 589 comparisons. *Stat Med*. 2004;23(20):3105-24.
- 9 590 20. Jansen JP, Naci H. Is network meta-analysis as valid as standard pairwise meta-analysis? It  
10 591 all depends on the distribution of effect modifiers. *BMC Med*. 2013;11:159.
- 11 592 21. White IR, Barrett JK, Jackson D, Higgins JP. Consistency and inconsistency in network meta-  
12 593 analysis: model estimation using multivariate meta-regression. *Res Synth Methods*. 2012;3(2):111-  
13 594 25.
- 14 595 22. Song F, Altman DG, Glenny AM, Deeks JJ. Validity of indirect comparison for estimating  
15 596 efficacy of competing interventions: empirical evidence from published meta-analyses. *BMJ*.  
16 597 2003;326(7387):472.
- 17 598 23. Veroniki AA, Vasiliadis HS, Higgins JP, Salanti G. Evaluation of inconsistency in networks of  
18 599 interventions. *Int J Epidemiol*. 2013;42(1):332-45.
- 19 600 24. Welton NJ, Sutton AJ, Cooper N, Abrams KR, Ades A. Evidence synthesis for decision making  
20 601 in healthcare. New York: Wiley; 2012.
- 21 602 25. Spiegelhalter DJ, Best NG, Carlin BP, Van Der Linde A. Bayesian measures of model  
22 603 complexity and fit. *J R Stat Soc Ser B Stat Methodol*. 2002;64(4):583-639.
- 23 604 26. Lunn D, Spiegelhalter D, Thomas A, Best N. The BUGS project: Evolution, critique and future  
24 605 directions. *Stat Med*. 2009;28(25):3049-67.
- 25 606 27. Palmer T, Sterne J. Meta-Analysis in Stata: An Updated Collection from the Stata Journal.  
26 607 White I, editor. Texas: Stata Press; 2016.
- 27 608 28. Riley RD, Higgins JP, Deeks JJ. Interpretation of random effects meta-analyses. *BMJ*.  
28 609 2011;342:d549.
- 29 610 29. Higgins JP, Thompson SG, Spiegelhalter DJ. A re-evaluation of random-effects meta-analysis.  
30 611 *J R Stat Soc Ser A Stat Soc*. 2009;172(1):137-59.
- 31 612 30. Salanti G, Ades AE, Ioannidis JP. Graphical methods and numerical summaries for  
32 613 presenting results from multiple-treatment meta-analysis: an overview and tutorial. *J Clin*  
33 614 *Epidemiol*. 2011;64(2):163-71.
- 34 615 31. Trinquart L, Attiche N, Bafeta A, Porcher R, Ravaud P. Uncertainty in Treatment Rankings:  
35 616 Reanalysis of Network Meta-analyses of Randomized Trials. *Ann Intern Med*. 2016;164(10):666-73.
- 36 617 32. Bromley R, Baxter N, Calderbank R, Mawer G, Clayton-Smith J, Baker G. A comprehensive  
37 618 review of the language abilities of children exposed to valproate or carbamazepine in utero.  
38 619 American Epilepsy Society; Texas2010.
- 39 620 33. Gogatishvili N, Ediberidze T, Lomidze G, Tatishvili N, Kasradze S. PO-0834 Long-term  
40 621 Developmental Outcome Of Children Prenatally Exposed To Antiepileptic Drugs. *Arch Dis Child*.  
41 622 2014;99(Suppl 2):A526.
- 42 623 34. Gogatishvili N, Ediberidze T, Lomidze G, Tatishvili N, Kasradze S. Cognitive outcomes of  
43 624 children with fetal antiepileptic drug exposure at the age of 3-6 years-preliminary data. 1st  
44 625 Congress of the European Academy of Neurology; Berlin: European Journal of Neurology; 2015. p.  
45 626 329.
- 46 627 35. Miskov S, Juraski RG, Fucic A, et al. Croatian Pregnant Women with Epilepsy and Effects of  
47 628 Antiepileptic Drugs Exposure in their Offspring - seven years of prospective surveillance. American  
48 629 Epilepsy Society; Texas2010.
- 49 630 36. Adab N, Kini U, Vinten J, et al. The longer term outcome of children born to mothers with  
50 631 epilepsy. *J Neurol Neurosurg Psychiatry*. 2004;75(11):1575-83.

- 1  
2  
3 632 37. Dean JCS, Hailey H, Moore SJ, Lloyd DJ, Turnpenny PD, Little J. Long term health and  
4 633 neurodevelopment in children exposed to antiepileptic drugs before birth. *J Med Genet.*  
5 634 2002;39(4):251-9.  
6 635 38. Gaily E. Development and growth in children of epileptic mothers: a prospective controlled  
7 636 study. Helsinki, Finland: University of Helsinki; 1990.  
8 637 39. Katz JM, Pacia SV, Devinsky O. Current Management of Epilepsy and Pregnancy: Fetal  
9 638 Outcome, Congenital Malformations, and Developmental Delay. *Epilepsy Behav.* 2001;2(2):119-23.  
10 639 40. Veroniki AA, Straus SE, Fyraridis A, Tricco AC. The rank-heat plot is a novel way to present  
11 640 the results from a network meta-analysis including multiple outcomes. *J Clin Epidemiol.* 2016.  
12 641 41. Veiby G, Engelsen BA, Gilhus NE. Early child development and exposure to antiepileptic  
13 642 drugs prenatally and through breastfeeding: a prospective cohort study on children of women with  
14 643 epilepsy. *JAMA Neurol.* 2013;70(11):1367-74.  
15 644 42. Shallcross R, Bromley RL, Irwin B, Bonnett LJ, Morrow J, Baker GA. Child development  
16 645 following in utero exposure: levetiracetam vs sodium valproate. *Neurology.* 2011;76(4):383-9.  
17 646 43. Zaccara G, Giovannelli F, Giorgi FS, Franco V, Gasparini S, Benedetto U. Tolerability of new  
18 647 antiepileptic drugs: a network meta-analysis. *Eur J Clin Pharmacol.* 2017.  
19 648 44. Higgins JPT, Green S, editors. Cochrane Handbook for Systematic Reviews of Interventions.  
20 649 5.1.0 ed: The Cochrane Collaboration; 2009.  
21 650 45. Kibret T, Richer D, Beyene J. Bias in identification of the best treatment in a Bayesian  
22 651 network meta-analysis for binary outcome: a simulation study. *Clin Epidemiol.* 2014;6:451-60.  
23 652 46. Dalessio DJ. Seizure Disorders and Pregnancy. *N Engl J Med.* 1985;312(9):559-63.  
24 653 47. Efthimiou O, Mavridis D, Debray TP, et al. Combining randomized and non-randomized  
25 654 evidence in network meta-analysis. *Stat Med.* 2017.  
26 655 48. Schmitz S, Adams R, Walsh C. Incorporating data from various trial designs into a mixed  
27 656 treatment comparison model. *Stat Med.* 2013;32(17):2935-49.  
28 657 49. Cameron C, Fireman B, Hutton B, et al. Network meta-analysis incorporating randomized  
29 658 controlled trials and non-randomized comparative cohort studies for assessing the safety and  
30 659 effectiveness of medical treatments: challenges and opportunities. *Systematic reviews.* 2015;4:147.  
31 660 50. Easterbrook PJ, Berlin JA, Gopalan R, Matthews DR. Publication bias in clinical research.  
32 661 *Lancet.* 1991;337(8746):867-72.  
33 662 51. Veroniki AA, Straus SE, Soobiah C, Elliott MJ, Tricco AC. A scoping review of indirect  
34 663 comparison methods and applications using individual patient data. *BMC Med Res Methodol.*  
35 664 2016;16(1):47.  
36 665

666 **Table 1 Summary characteristics of included studies**

| <b>Table 1. Summary Characteristics of included studies</b> |                                |                     |
|-------------------------------------------------------------|--------------------------------|---------------------|
| <b>Study/Patient Characteristic</b>                         | <b># of Studies<br/>(n=29)</b> | <b>% of Studies</b> |
| <i>Year of publication</i>                                  |                                |                     |
| 1980-1989                                                   | 1                              | 3.45                |
| 1990-1999                                                   | 6                              | 20.69               |
| 2000-2009                                                   | 5                              | 17.24               |
| 2010-2015                                                   | 17                             | 58.62               |
| <i>Continent (of country of study conduct)</i>              |                                |                     |
| Europe                                                      | 20                             | 68.97               |
| North America                                               | 5                              | 17.24               |
| Asia                                                        | 1                              | 3.45                |
| Australia                                                   | 2                              | 6.90                |
| Trans-Continental                                           | 1                              | 3.45                |
| <i>Study design</i>                                         |                                |                     |
| Observational cohort                                        | 29                             | 100.00              |
| Case-control                                                | 0                              | 0.00                |
| Randomized clinical trial                                   | 0                              | 0.00                |
| <i>Registry study</i>                                       |                                |                     |
| Yes                                                         | 11                             | 37.93               |
| No                                                          | 18                             | 62.07               |
| <i>Sample size</i>                                          |                                |                     |
| 0-99                                                        | 18                             | 62.07               |
| 100-299                                                     | 9                              | 31.03               |
| 300-499                                                     | 1                              | 3.45                |
| 500-699                                                     | 0                              | 0.00                |
| 700-999                                                     | 0                              | 0.00                |
| 1000+                                                       | 1                              | 3.45                |
| <i>Number of interventions</i>                              |                                |                     |
| 2                                                           | 4                              | 13.79               |
| 3                                                           | 5                              | 17.24               |
| 4                                                           | 8                              | 27.59               |
| 5-7                                                         | 8                              | 27.59               |
| 8-10                                                        | 2                              | 6.90                |
| 11+                                                         | 2                              | 6.90                |
| <i>Outcomes*<sup>†</sup></i>                                |                                |                     |
| Cognitive Developmental Delay                               | 12                             | 58.62               |
| Autism/Dyspraxia                                            | 5                              | 17.24               |
| Language Delay                                              | 5                              | 17.24               |
| ADHD                                                        | 5                              | 17.24               |

**Table 1. Summary Characteristics of included studies**

| Study/Patient Characteristic                 | # of Studies<br>(n=29) | % of Studies |
|----------------------------------------------|------------------------|--------------|
| Psychomotor Developmental Delay              | 11                     | 37.93        |
| Neonatal Seizures                            | 2                      | 6.90         |
| Social Impairment                            | 1                      | 3.45         |
| <i>Funding</i>                               |                        |              |
| Public                                       | 15                     | 51.72        |
| Private                                      | 0                      | 0.00         |
| Mixed public and private                     | 4                      | 13.79        |
| NR/Unclear                                   | 10                     | 34.48        |
| <i>Treatment indication</i>                  |                        |              |
| Epilepsy                                     | 23                     | 79.31        |
| Mixed indications <sup>†</sup>               | 0                      | 0.00         |
| Not reported                                 | 6                      | 20.69        |
| <i>Epileptic control group<sup>§</sup></i>   |                        |              |
| Yes                                          | 15                     | 51.72        |
| No/NR/NA                                     | 14                     | 48.28        |
| <i>Mean maternal age</i>                     |                        |              |
| 24-26 y                                      | 2                      | 6.90         |
| 27-29 y                                      | 5                      | 17.24        |
| 30+ y                                        | 4                      | 13.79        |
| Not reported                                 | 18                     | 62.07        |
| <i>AED exposure during pregnancy</i>         |                        |              |
| Reported as during 1 <sup>st</sup> trimester | 6                      | 20.69        |
| Reported as any time during pregnancy        | 6                      | 20.69        |
| Not reported                                 | 17                     | 58.62        |
| <i>Alcohol use during pregnancy</i>          |                        |              |
| Yes                                          | 5                      | 17.24        |
| NR                                           | 24                     | 82.76        |
| <i>Tobacco use during pregnancy</i>          |                        |              |
| Yes                                          | 7                      | 24.14        |
| NR                                           | 22                     | 75.86        |

**Abbreviations:** ADHD - Attention Deficit Hyperactivity Disorder; AED - anti-epileptic drug(s); NA - Not applicable; NR - Not reported

\*Values in this category do not match totals as some studies report more than one outcome

<sup>†</sup>Percentage of total number of included studies (n=29)

<sup>‡</sup>Includes individuals taking AEDs for psychiatric disorders, migraine, and neuropathic/neurological pain

<sup>§</sup>Consisted of women with Epilepsy who did not take AEDs during pregnancy

667 **Table 2 Outcome measures and diagnostic scales used in analysis**

| <b>Cognitive developmental delay</b>                         |                                                                                                                        |
|--------------------------------------------------------------|------------------------------------------------------------------------------------------------------------------------|
| Bayley Scales of Infant Development (children $\leq$ 42 mo.) | Score $\geq$ 2 standard deviations below the mean                                                                      |
| Griffiths Scale of Infant Development (children >42 mo.)     | Score $\geq$ 2 standard deviations below the mean                                                                      |
| McCarthy Scales of Children's Abilities (children >30 mo.)   | Score $\geq$ 1 standard deviations below the mean                                                                      |
| Stanford-Binet IV Intelligence scale for children            | Intelligence quotient $\leq$ 80                                                                                        |
| Touwen's Test                                                | Above average number of items rated abnormal in one or more domains                                                    |
| Wechsler Scale of Preschool and Primary Intelligence         | Intelligence quotient <90                                                                                              |
| Wechsler Intelligence Scale for Children - III               | Intelligence quotient <80; verbal intelligence quotient <69                                                            |
| Developmental Assessment                                     | Confirmed diagnosis by developmental pediatrician or pediatric neurologist                                             |
| <b>Autism/dyspraxia</b>                                      |                                                                                                                        |
| Developmental Assessment                                     | Diagnosis confirmed by developmental specialists at 2 years of age                                                     |
| Medical Records                                              | Confirmed diagnosis recorded in medical history; registry records (ICD-10 codes F84.0, F84.1, F84.5, F84.8, and F84.9) |
| Modified checklist for autism in toddlers                    | Scored positive for $\geq$ 2 out of 6 critical items OR $\geq$ 3 any items of the total scale                          |
| <b>Psychomotor developmental delay</b>                       |                                                                                                                        |
| Agas and Stages Questionnaire                                | >3 standard deviations from the test mean                                                                              |
| Bayley Scales of Infant Development – Psychomotor Index      | >2 standard deviations below the standardized mean for the test                                                        |
| Touwen's Test                                                | Demonstrated dysfunctions in fine motor balance, fine motor functions, and coordination of extremities                 |
| Schedule of Growing Skills II                                | Scored as 'delayed' in $\geq$ 1 domain of the test                                                                     |

|                                                                                                                                                                                                                     |                                                                                                                                                                                                                            |
|---------------------------------------------------------------------------------------------------------------------------------------------------------------------------------------------------------------------|----------------------------------------------------------------------------------------------------------------------------------------------------------------------------------------------------------------------------|
| Developmental Assessment                                                                                                                                                                                            | Infant scored >2 negative items (administered by general practitioner or pediatrician); diagnosis of neuromotor deficit confirmed by a trained nurse practitioner; infant failing to sit by 10 months or walk by 18 months |
| Health/Medical Records                                                                                                                                                                                              | Diagnosis of psychomotor delay recorded in medical records                                                                                                                                                                 |
| <b>Language Delay</b>                                                                                                                                                                                               |                                                                                                                                                                                                                            |
| Ages and Stages Questionnaire                                                                                                                                                                                       | >3 standard deviations from the test mean                                                                                                                                                                                  |
| Clinical Evaluation of Language Fundamentals – 4 <sup>th</sup> Edition                                                                                                                                              | Score <70 in core language domain; score <84 overall                                                                                                                                                                       |
| Learning Accomplishment Profile                                                                                                                                                                                     | Below average performance in expressive speech (adjusted for age)                                                                                                                                                          |
| Comprehensive Language Assessment (Peabody Picture Vocabulary Test; Receptive Expressive Emergent Language Scale; Expressive One Word Picture Vocabulary Test, or Sequenced Inventory of Communication Development) | Scores/assessment indicate a >6 moth delay in age appropriate language development                                                                                                                                         |
| <b>ADHD</b>                                                                                                                                                                                                         |                                                                                                                                                                                                                            |
| Attention Problems and Hyperactivity Scales                                                                                                                                                                         | Score >1 standard deviations from the test mean                                                                                                                                                                            |
| Child Behaviour Checklist                                                                                                                                                                                           | ≥6 positive items on checklist                                                                                                                                                                                             |
| Diagnostic and Statistical Manual – IV                                                                                                                                                                              | ≥5 positive items on checklist                                                                                                                                                                                             |
| Medical Records                                                                                                                                                                                                     | Confirmed diagnosis in hospital/medical records made by a pediatrician or child psychiatrist                                                                                                                               |
| <b>Neonatal Seizure</b>                                                                                                                                                                                             |                                                                                                                                                                                                                            |
| Medical records                                                                                                                                                                                                     | Record of seizures during 1 <sup>st</sup> year; confirmation of neonatal seizure by electroencephalography or diagnosis                                                                                                    |
| <b>Social Impairment</b>                                                                                                                                                                                            |                                                                                                                                                                                                                            |
| Developmental Assessment (Ages and Stages Questionnaire [6 and 18 months]; Child Behaviour Checklist [36 months])                                                                                                   | Scores dichotomized into 'normal' or 'adverse' range based on pre-defined values used by scale, for scales without pre-defined values cut-off was set at a score >2 standard deviations outside the test mean              |

668



1  
2  
3  
4  
5  
6  
7  
8  
9  
10  
11  
12  
13  
14  
15  
16  
17  
18  
19  
20  
21  
22  
23  
24  
25  
26  
27  
28  
29  
30  
31  
32  
33  
34  
35  
36  
37  
38  
39  
40  
41  
42  
43  
44  
45  
46  
47  
48  
49  
50  
51  
52  
53  
54  
55  
56  
57  
58  
59  
60

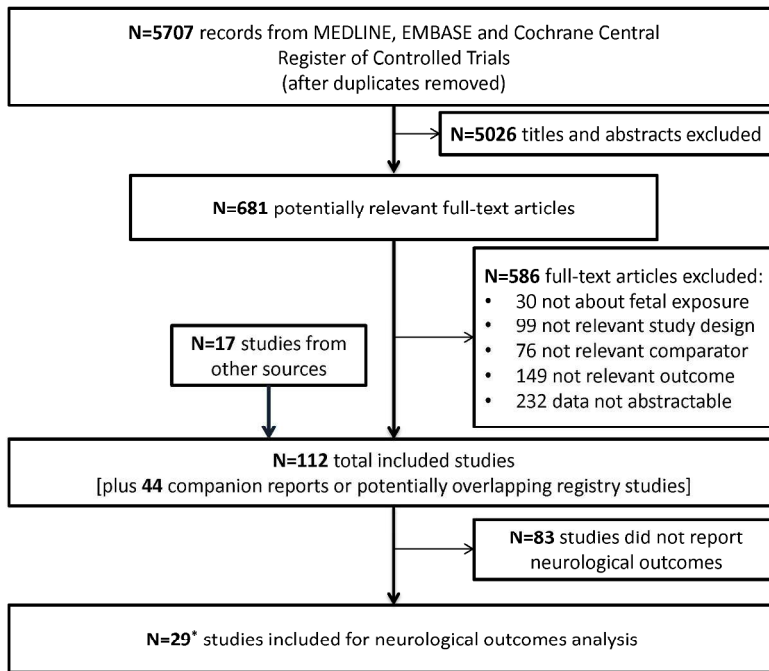

\*29 publications reporting 30 included studies.

TITLE: Study flow diagram

254x190mm (300 x 300 DPI)

ew only

1  
2  
3  
4  
5  
6  
7  
8  
9  
10  
11  
12  
13  
14  
15  
16  
17  
18  
19  
20  
21  
22  
23  
24  
25  
26  
27  
28  
29  
30  
31  
32  
33  
34  
35  
36  
37  
38  
39  
40  
41  
42  
43  
44  
45  
46  
47  
48  
49  
50  
51  
52  
53  
54  
55  
56  
57  
58  
59  
60

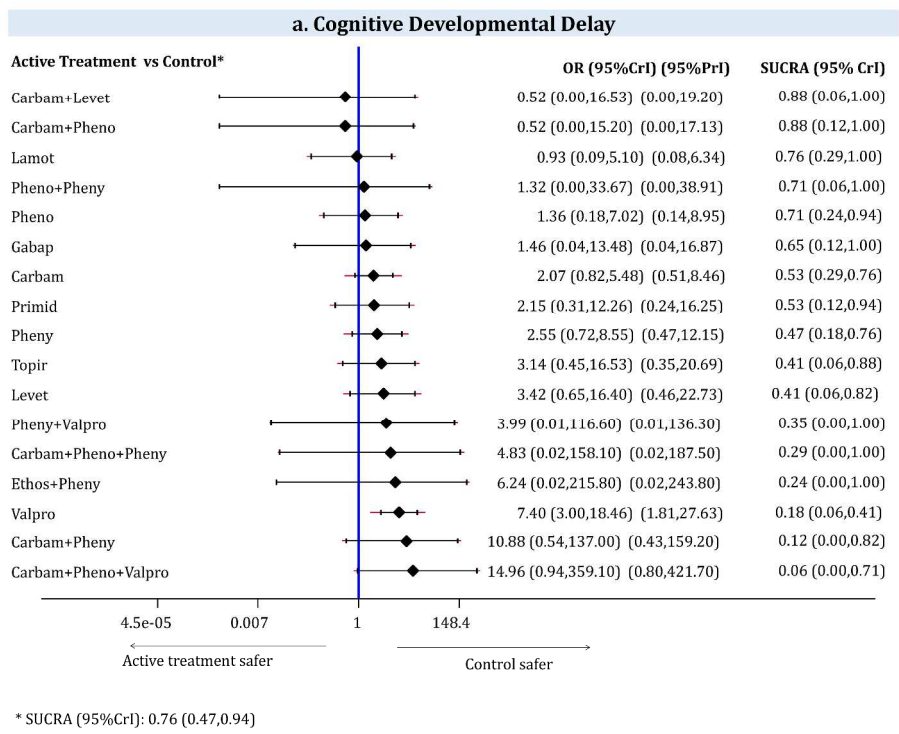

TITLE: Forest plots for cognitive developmental delay, autism/dyspraxia, psychomotor developmental delay, language delay, and attention deficit hyperactivity disorder outcome

533x400mm (300 x 300 DPI)

1  
2  
3  
4  
5  
6  
7  
8  
9  
10  
11  
12  
13  
14  
15  
16  
17  
18  
19  
20  
21  
22  
23  
24  
25  
26  
27  
28  
29  
30  
31  
32  
33  
34  
35  
36  
37  
38  
39  
40  
41  
42  
43  
44  
45  
46  
47  
48  
49  
50  
51  
52  
53  
54  
55  
56  
57  
58  
59  
60

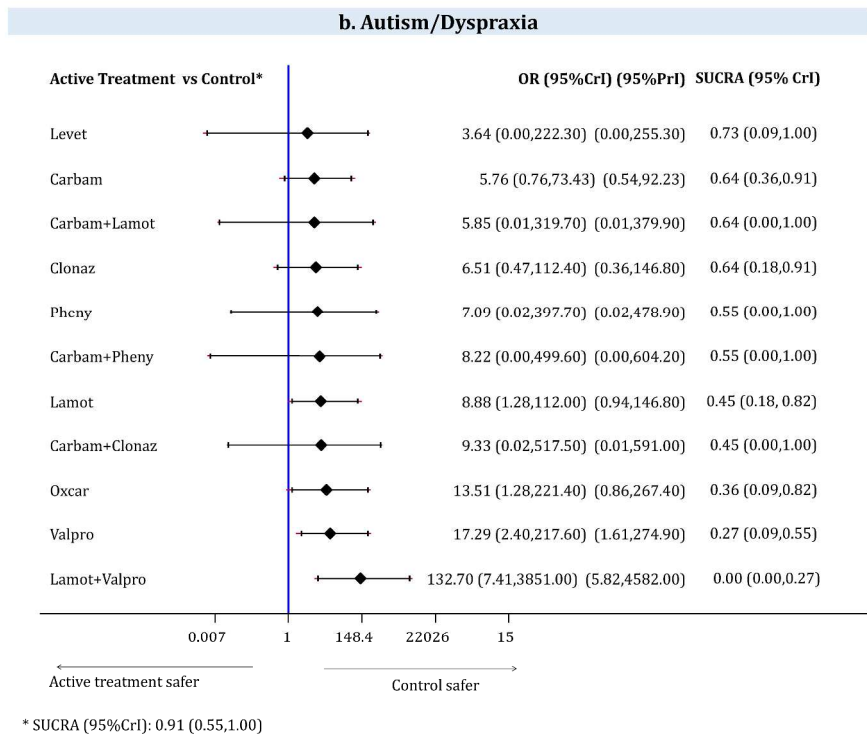

TITLE: Forest plots for cognitive developmental delay, autism/dyspraxia, psychomotor developmental delay, language delay, and attention deficit hyperactivity disorder outcome

533x400mm (300 x 300 DPI)

c. Psychomotor developmental delay

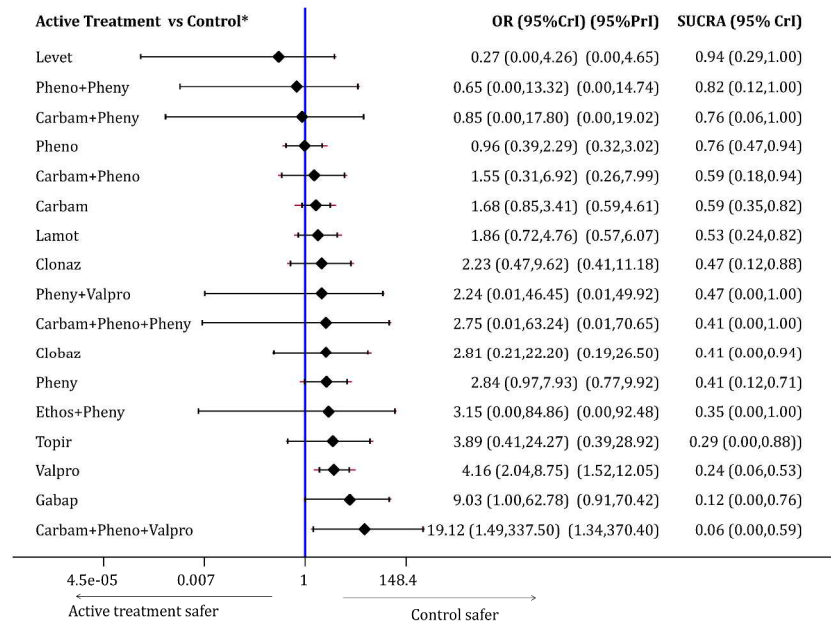

\* SUCRA (95%CrI): 0.76 (0.53,0.94)

TITLE: Forest plots for cognitive developmental delay, autism/dyspraxia, psychomotor developmental delay, language delay, and attention deficit hyperactivity disorder outcome

533x400mm (300 x 300 DPI)

1  
2  
3  
4  
5  
6  
7  
8  
9  
10  
11  
12  
13  
14  
15  
16  
17  
18  
19  
20  
21  
22  
23  
24  
25  
26  
27  
28  
29  
30  
31  
32  
33  
34  
35  
36  
37  
38  
39  
40  
41  
42  
43  
44  
45  
46  
47  
48  
49  
50  
51  
52  
53  
54  
55  
56  
57  
58  
59  
60

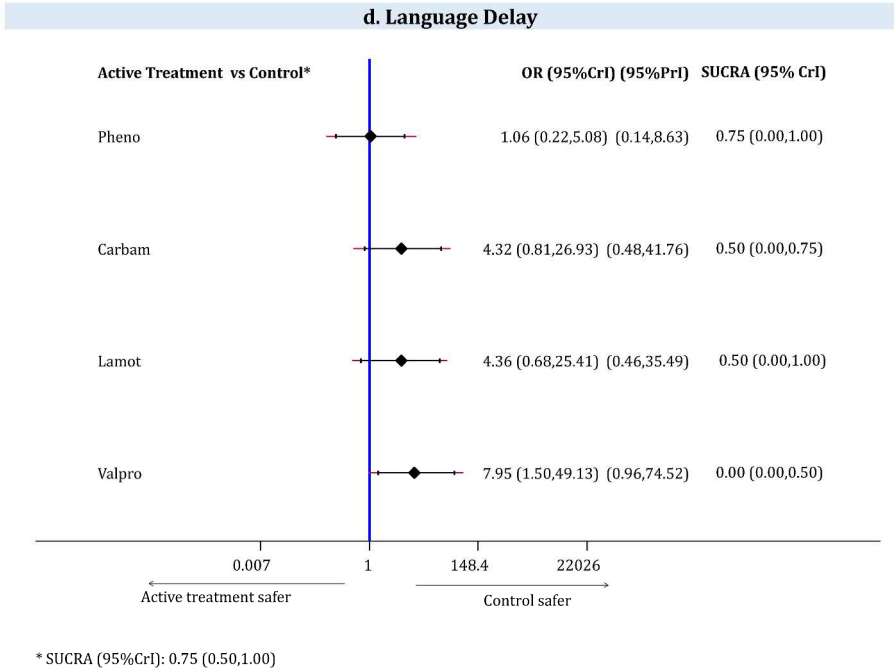

TITLE: Forest plots for cognitive developmental delay, autism/dyspraxia, psychomotor developmental delay, language delay, and attention deficit hyperactivity disorder outcome

533x400mm (300 x 300 DPI)

Peer Review Only

1  
2  
3  
4  
5  
6  
7  
8  
9  
10  
11  
12  
13  
14  
15  
16  
17  
18  
19  
20  
21  
22  
23  
24  
25  
26  
27  
28  
29  
30  
31  
32  
33  
34  
35  
36  
37  
38  
39  
40  
41  
42  
43  
44  
45  
46  
47  
48  
49  
50  
51  
52  
53  
54  
55  
56  
57  
58  
59  
60

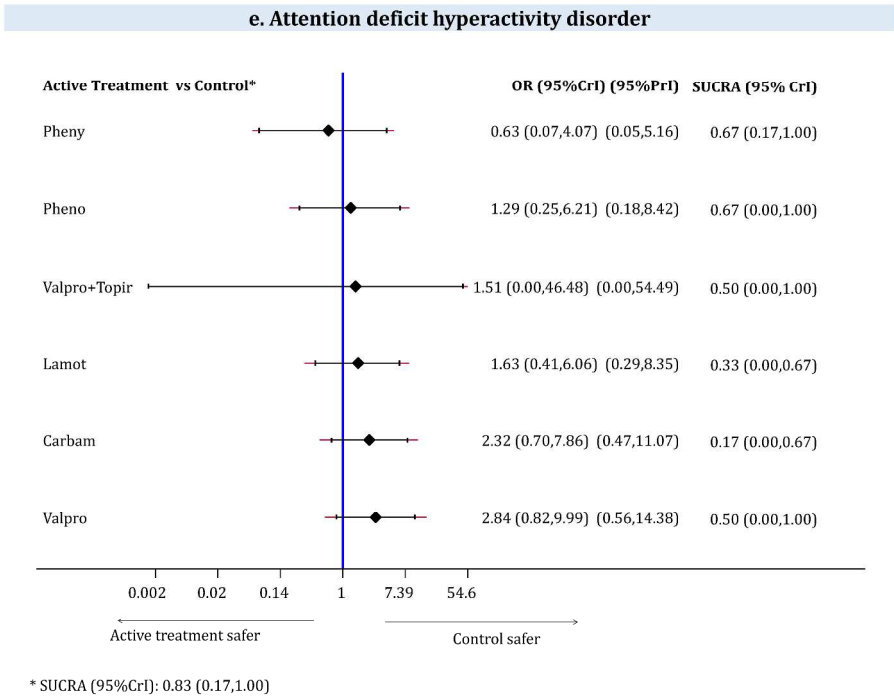

TITLE: Forest plots for cognitive developmental delay, autism/dyspraxia, psychomotor developmental delay, language delay, and attention deficit hyperactivity disorder outcome

533x400mm (300 x 300 DPI)

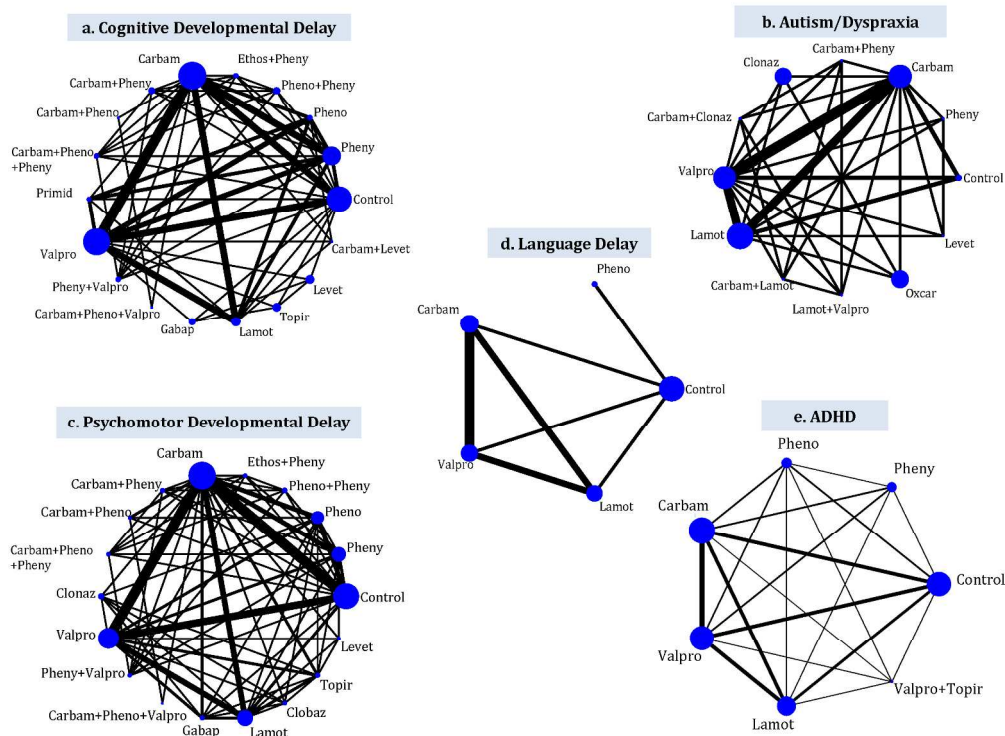

TITLE: Network diagrams for cognitive developmental delay, autism/dyspraxia, psychomotor developmental delay, language delay, and attention deficit hyperactivity disorder outcomes.

CAPTION: Each treatment node is weighted according to the number of patients that have received the particular treatment, and each edge is weighted according to the number of studies comparing the treatments it connects.

Abbreviations: carbam - carbamazepine, clobaz - clobazam, clonaz - clonazepam, ethos - ethosuximide, gabap - gabapentin, lamot - lamotrigine, levet - levetiracetam, oxcar - oxcarbazepine, pheno - phenobarbital, pheny - phenytoin, primid - primidone, topir - topiramate, valpro - valproate, vigab - vigabatrin

254x190mm (300 x 300 DPI)

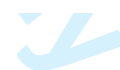

## PROTOCOL

## Open Access

# Comparative safety of anti-epileptic drugs among infants and children exposed *in utero* or during breastfeeding: protocol for a systematic review and network meta-analysis

Andrea C Tricco<sup>1</sup>, Elise Cogo<sup>1</sup>, Veroniki A Angeliki<sup>1</sup>, Charlene Soobiah<sup>1,2</sup>, Brian Hutton<sup>3</sup>, Brenda R Hemmelgarn<sup>4</sup>, David Moher<sup>3</sup>, Yaron Finkelstein<sup>5,6,7</sup> and Sharon E Straus<sup>1,8\*</sup>

## Abstract

**Background:** Epilepsy affects about 1% of the general population. Anti-epileptic drugs (AEDs) prevent or terminate seizures in individuals with epilepsy. Pregnant women with epilepsy may continue taking AEDs. Many of these agents cross the placenta and increase the risk of major congenital malformations, early cognitive and developmental delays, and infant mortality. We aim to evaluate the comparative safety of AEDs approved for chronic use in Canada when administered to pregnant and breastfeeding women and the effects on their infants and children through a systematic review and network meta-analysis.

**Methods:** Studies examining the effects of AEDs administered to pregnant and breastfeeding women regardless of indication (e.g., epilepsy, migraine, pain, psychiatric disorders) on their infants and children will be included. We will include randomized clinical trials (RCTs), quasi-RCTs, non-RCTs, controlled before-after, interrupted time series, cohort, registry, and case-control studies. The main literature search will be executed in MEDLINE, EMBASE, and the Cochrane Central Register of Controlled Trials. We will seek unpublished literature through searches of trial protocol registries and conference abstracts. The literature search results screening, data abstraction, and risk of bias appraisal will be performed by two individuals, independently. Conflicts will be resolved through discussion. The risk of bias of experimental and quasi-experimental studies will be appraised using the Cochrane Effective Practice and Organization of Care Risk-of-Bias tool, methodological quality of observational studies will be appraised using the Newcastle-Ottawa Scale, and quality of reporting of safety outcomes will be conducted using the McMaster Quality Assessment Scale of Harms (McHarm) tool. If feasible and appropriate, we will conduct random effects meta-analysis. Network meta-analysis will be considered for outcomes that fulfill network meta-analysis assumptions.

The primary outcome is major congenital malformations (overall and by specific types), while secondary outcomes include fetal loss/miscarriage, minor congenital malformations (overall and by specific types), cognitive development, psychomotor development, small for gestational age, preterm delivery, and neonatal seizures.

(Continued on next page)

\* Correspondence: [sharon.straus@utoronto.ca](mailto:sharon.straus@utoronto.ca)

<sup>1</sup>Li Ka Shing Knowledge Institute, St. Michael's Hospital, 209 Victoria Street, East Building, Toronto, Ontario M5B 1 T8, Canada

<sup>8</sup>Department of Geriatric Medicine, University of Toronto, 172 St. George Street, Toronto, Ontario M5R 0A3, Canada

Full list of author information is available at the end of the article



(Continued from previous page)

**Discussion:** Our systematic review will address safety concerns regarding the use of AEDs during pregnancy and breastfeeding. Our results will be useful to healthcare providers, policy-makers, and women of childbearing age who are taking anti-epileptic medications.

**Systematic review registration:** PROSPERO CRD42014008925.

**Keywords:** Anti-epileptic drug, Breastfeeding, Comparative safety, Congenital malformation, Epilepsy, Fetus, Infant, Network meta-analysis, Pregnancy, Systematic review

## Background

Epilepsy is the most common chronic neurological condition, affecting 0.6 to 1% of the population [1,2]. Individuals with uncontrolled epilepsy experience recurrent seizures, which can have psychosocial and physical consequences, including a compromised life expectancy [3,4]. The goal of anti-epileptic treatment is to improve quality of life and health outcomes by reducing the frequency of seizures [4].

Anti-epileptic medications decrease seizures by reducing excitation and enhancing inhibition of neurons [5-7]. Many of these medications target different channels, including calcium, sodium, and glutamate, and are broadly classified as first generation agents (e.g., phenobarbitone, phenytoin, carbamazepine, sodium valproate, ethosuximide) and second generation agents (e.g., lamotrigine, levetiracetam, topiramate, gabapentin, vigabatrin, oxcarbazepine, clobazam, clonazepam, zonisamide, lacosamide, rufinamide, primidone) [8]. Due to the broad and varied mechanisms of action, the indications for some of these medications also include pain syndromes, psychiatric disorders, and migraine headaches [8].

Many clinical practice guidelines recommend that women of childbearing age continue to take their anti-epileptic medications; however, medications with lower risk of teratogenic events are advised [9,10] since anti-epileptic drugs (AEDs) cross the placenta or transfer through breast milk, posing risks to the fetus and infant [9,11,12].

Some AEDs have been associated with increased risk of harm to the fetus and infants. For example, exposure to valproate has led to increased risk of major congenital malformations [10], cognitive delay, and minor congenital abnormalities [13-16]. Phenobarbital has been associated with minor congenital abnormalities and developmental delay [17,18]. Carbamazepine and lamotrigine have been associated with minor congenital abnormalities [19-22]. However, other than studies of the use of valproate, many studies have produced inconsistent findings regarding harm to the fetus and infant with use of other agents [23]. As such, our objective is to evaluate the comparative safety of AEDs for infants and children who were exposed *in utero* or during breastfeeding through a systematic review and network meta-analysis.

## Methods/Design

### Protocol

A systematic review protocol was developed and registered with the PROSPERO database (CRD42014008925, available at: [http://www.crd.york.ac.uk/PROSPERO/display\\_record.asp?ID=CRD42014008925](http://www.crd.york.ac.uk/PROSPERO/display_record.asp?ID=CRD42014008925)). It was revised with feedback from the decision-makers who posed the query within Health Canada, healthcare practitioners, content experts, and research methodologists. The reporting of our systematic review protocol was guided by the Preferred Reporting Items for Systematic Reviews and Meta-analyses Protocols [24].

### Eligibility criteria

We will include studies examining the effects of AEDs on infants and children who were exposed *in utero* or during breastfeeding. We will include experimental studies (randomized clinical trials [RCTs], quasi-RCTs, non-RCTs), quasi-experimental studies (controlled before and after studies, interrupted time series), and observational studies (cohort, case-control, registry studies) of pregnant women at any stage of pregnancy and breastfeeding women and their infants/children. The rationale for including other study designs in addition to RCTs is that there are ethical issues in conducting RCTs of AEDs in pregnancy, so RCT evidence might not exist for some or all of these drugs. Given that our review includes rare outcomes, including observational evidence is crucial. In contrast to efficacy evaluation, safety assessment usually requires very large sample sizes to be able to detect adverse events. Therefore, while RCTs have lower risk of bias, they usually do not have the statistical power needed to adequately evaluate uncommon/rare safety outcomes due to Type II (i.e., false negative) error [25]. Given that our review includes rare outcomes, including observational evidence is crucial [26]. Additionally, observational studies can often provide more generalizable evidence due to the strict participant inclusion criteria in most RCTs [27]. Real-world safety evidence that has external validity is important for the assessment of the possible risks of AEDs in pregnant and breastfeeding women.

The diagnosis of neurodevelopmental delay related to *in utero* exposure is made before adolescence, and

1  
2  
3  
4  
5 hence, we will limit inclusion to children up to 12 years  
6 of age. AEDs that are approved for chronic use in Canada  
7 will be included. Drugs that are only used acutely or those  
8 that are not currently approved for use in Canada will be  
9 excluded, as the focus of this review is on the Canadian  
10 setting [28-32]. However, most of the medications we  
11 will examine are available in other countries as well.  
12 The relevant 16 medications and their synonyms are  
13 listed in Additional file 1, and the excluded drugs are  
14 listed in Additional file 2. Studies of all combinations  
15 and doses of these medications are eligible for inclusion.  
16 Since we are only interested in exposures that occur *in*  
17 *utero* or during breastfeeding, studies examining AEDs  
18 administered directly to infants or children will be  
19 excluded. All indications for AEDs will be included such  
20 as epilepsy, migraine, pain, and psychiatric disorders.

21 In order to be included, studies must compare an anti-  
22 epileptic medication against another included anti-epileptic  
23 medication, placebo, a 'no intervention' control group, or  
24 combinations of two or more anti-epileptic medications.  
25 Only studies providing results for our outcomes of interest  
26 will be included. Our primary outcome is major congenital  
27 malformations (overall and by specific type, such as  
28 craniofacial defects and neural tube defects). Secondary  
29 outcomes include minor congenital malformations (over-  
30 all and by specific type, such as epicanthal folds and  
31 microstomia), cognition (e.g., global cognitive functioning  
32 and specific cognitive domains such as attention), psycho-  
33 motor development (e.g., autism, dyspraxia), small for ges-  
34 tational age, preterm delivery, neonatal seizures, and fetal  
35 loss/miscarriage. No other limitations will be imposed on  
36 the eligibility criteria, including published/unpublished  
37 material, language of dissemination, duration of follow-up,  
38 or year of publication. The draft eligibility criteria can be  
39 found in Additional file 3.

#### 41 Information sources and literature search

42 Our main literature search will be executed in the MED-  
43 LINE database. The search terms were drafted by an experi-  
44 enced librarian and can be found in Additional file 4. The  
45 search was peer reviewed by another librarian using the  
46 Peer Review of Electronic Search Strategies checklist [33].

47 In addition to MEDLINE, we will also search the  
48 EMBASE and the Cochrane Central Register of Con-  
49 trolled Trials databases. We will follow the MEDLINE  
50 search strategy for these databases, and the search  
51 terms will be adjusted accordingly. The electronic  
52 database search will be supplemented by searching for  
53 unpublished literature [34]. This will be accomplished  
54 through exploring conference abstracts, clinical trial  
55 registries, and contacting manufacturers of AEDs. We  
56 will also scan the reference lists of included studies  
57 and previous reviews in the area [23,35,36].

#### Study selection process

The eligibility criteria screening form will be pilot-tested  
by the team and is presented in Additional file 3. We  
will calculate inter-rater reliability from the pilot-test  
and screening will only commence after high agreement  
(e.g., kappa statistic  $\geq 60\%$ ) is observed [37]. Subsequently,  
two reviewers will screen each title/abstract and poten-  
tially relevant full-text articles from the literature search  
results, independently. Conflicts will be resolved through  
discussion. All screening will occur using our online  
screening software (synthesi.SR) [38].

#### Data items and data collection process

We will abstract data on the PICOS elements [39], in-  
cluding patient characteristics (e.g., age of the mother  
and infant/child, indication for anti-epileptic treatment,  
co-morbidities, concomitant medications), intervention  
details (e.g., type of anti-epileptic treatment, dose, route  
of administration, duration of treatment, timing [trimes-  
ter] of treatment during pregnancy), comparator details  
(e.g., comparator agent, dose, route of administration),  
outcome results (e.g., major congenital abnormality, minor  
congenital abnormality, cognitive function, psychomotor  
development) at the longest duration of follow-up, and  
study characteristics (e.g., study design, country of con-  
duct, year of conduct, sample size, setting). These charac-  
teristics will be abstracted using a data abstraction form  
created in Excel with an accompanying "cheat sheet" that  
will guide the reviewers with this process. The data ab-  
straction form and cheat sheet will be pilot-tested and  
data abstraction will only commence when high agree-  
ment (e.g., kappa statistic  $\geq 60\%$ ) [37] is observed. Each  
included study will be abstracted by two team members,  
independently, who will resolve disagreements through  
discussion.

#### Methodological quality/risk of bias appraisal

We will use various tools to assess the methodological  
quality/risk of bias of each of the studies that fulfill our  
eligibility criteria. This will be conducted by two reviewers,  
independently, and conflicts will be resolved through dis-  
cussion. First, we will appraise the risk of bias of experi-  
mental and quasi-experimental studies using the Cochrane  
Effective Practice and Organization of Care Risk-of-Bias  
tool [40]. Second, we will assess the methodological quality  
of observational studies using the Newcastle-Ottawa Scale  
[41]. Third, the quality of reporting of harms will be  
appraised using the McMaster Quality Assessment Scale  
of Harms (McHarm) tool [42].

#### Synthesis of included studies

A narrative summary of study results will be presented  
along with evidence summary tables. When sufficient  
data are available, we will conduct random effects meta-

1  
2  
3  
4  
5  
6  
7  
8  
9  
10  
11  
12  
13  
14  
15  
16  
17  
18  
19  
20  
21  
22  
23  
24  
25  
26  
27  
28  
29  
30  
31  
32  
33  
34  
35  
36  
37  
38  
39  
analysis to calculate pooled odds ratios for dichotomous data and pooled mean differences for continuous data [43,44]. Direct (pairwise) meta-analysis will be performed with RCTs alone in order to examine whether the data are consistent between direct and indirect evidence. If the large majority of included studies are observational, we will also conduct additional meta-analyses including observational studies alone. Analyses will be stratified by treatment indication (e.g., epilepsy, pain, etc.) to reduce clinical heterogeneity between different study populations whenever possible; for example, epilepsy itself in pregnant women is related to an increased baseline risk of certain neonatal adverse outcomes. Statistical, clinical, and methodological heterogeneity will be examined prior to conducting the meta-analysis. Funnel plots will be drawn for outcomes including at least 10 studies to explore asymmetry that might be explained by clinical, statistical, and methodological heterogeneity. The proportion of statistical heterogeneity will be examined using the  $I^2$  measure [45] and the magnitude of statistical heterogeneity will be calculated using the restricted maximum likelihood [46]. Meta-regression will be conducted for clinically relevant subgroups or when extensive statistical heterogeneity is observed (e.g.,  $I^2 \geq 75\%$ ) [47]. This will allow the examination of the impact of important factors on our results, such as maternal age, dose, duration and timing (e.g., trimester) of anti-epileptic treatment, co-morbidities, concomitant medications, risk of bias results, and sample size (due to Type II statistical power errors with rare adverse events). To ensure the meta-regression analysis is intuitive, the number of covariates examined will be less than 10% of the number of studies included in the meta-analysis for the particular outcome.

40  
41  
42  
43  
44  
45  
46  
47  
48  
49  
50  
51  
52  
53  
We anticipate that many of these outcomes will be rare. To deal with studies reporting zero events in one treatment arm, 0.5 will be added to the numerator and 1 will be added to the denominator. We will exclude studies reporting zero events in all treatment arms for a particular outcome [48,49]. We also anticipate that we will encounter missing data in the included studies. We will contact the study authors for this data and if we are unable to receive the data, we will impute missing data (e.g., measures of variance) using established methods [50]. To ensure that our imputations do not bias our results, we will conduct a sensitivity analysis [51]. The meta-analysis and meta-regression will be analyzed in R using the *metafor* command [52].

54  
55  
56  
57  
58  
59  
60  
A random-effects network meta-analysis will be conducted to make inferences regarding the comparative safety of the various AEDs [15], as well as rank their safety using rankograms and the surface under the cumulative ranking curve [53]. We will ensure the following factors are present prior to conducting network meta-analysis:

i) transitivity (i.e., comparable distribution of effect modifiers across comparisons), which will be examined using boxplots or percentages to visually inspect potential effect modifiers of treatment effect [54]; ii) consistency between direct and indirect data, which will be examined locally (i.e., in certain paths of the network) using the loop-specific method [55,56] and the node-splitting method [57], and globally (i.e., evaluating the network as a whole), using the design-by-treatment interaction model [58]; and iii) we will quantify the amount of variability attributed to heterogeneity and inconsistency rather than sampling error, by calculating the  $I^2$  [59]. We will estimate the amount of heterogeneity using the restricted maximum likelihood method and assuming common within-network heterogeneity. We will compare the magnitude of heterogeneity between consistency and inconsistency models, as well as between meta-regression and network meta-analysis models to determine how much heterogeneity will be explained by inconsistency or the explanatory variable, respectively. We will first use the design-by-treatment model for the evaluation of inconsistency in a network as a whole and then, if inconsistency is detected, we will employ the loop-specific and node-splitting methods to identify which piece of evidence is responsible for inconsistency. As mentioned above, analyses will be stratified by treatment indication when clinically appropriate. Important heterogeneity and inconsistency will be explored using network meta-regression using the same methods as described above, as necessary.

Prior to conducting the network meta-analysis, we will hold a team meeting to finalize which treatment nodes will be included in the analysis since we are unclear about the indications, dosages, patient populations, and outcomes reported in all of the studies. We will discuss issues, including conducting a class versus independent drug analysis, inclusion of drug routes of administration and dosages, as well as timing of drug administration. These decisions will be examined through a sensitivity analysis in which we will classify treatment nodes using a different classification to see how stable our results are. The network meta-analysis results will be presented as summary treatment effects for each pair of treatments. Network meta-analysis will be conducted in Stata with the *mvmeta* routine [60].

A sequential approach will be used for the network meta-analysis. We will first restrict our analysis to RCTs, which will be the primary analysis of interest. We will then include data from quasi-experimental studies, and finally, data from observational studies. This will provide an understanding of the contribution of each type of study design to our summary estimates, providing us with information on how these agents work above and beyond clinical trials.

## Discussion

Epilepsy is the most common chronic neurological condition, affecting 0.6 to 1% of the population [1,2]. Given that approximately a third of patients receiving AEDs are of reproductive age and almost half of pregnancies are unplanned [61], the fetus may be exposed to these in the first trimester of pregnancy, including during the critical stage of embryogenesis [62].

The comparative safety of these agents is currently unknown and our results will be important for policy-makers, healthcare providers, and women of childbearing age. To ensure our results have wide dissemination and uptake, we will publish our results in open access journals, present our findings at scientific conferences, conduct dissemination meetings with key stakeholders (including policy-makers and healthcare providers), and produce policy briefs for Health Canada, the organization that posed this query.

## Additional files

**Additional file 1:** List of relevant medications.

**Additional file 2:** Excluded drugs.

**Additional file 3:** Draft eligibility criteria.

**Additional file 4:** MEDLINE literature search.

## Abbreviations

AEDs: Anti-epileptic drugs; RCTs: Randomized clinical trials.

## Competing interests

The authors declare that they have no competing interests.

## Authors' contributions

ACT conceived and designed the study, helped obtain funding for the study, and helped write the draft protocol. EC registered the protocol with the PROSPERO database and edited the draft protocol. AV helped write the draft protocol. CS edited the draft protocol. BH, BRH, DM, and YF provided input into the design, helped obtain funding for the study, and edited the draft protocol. SES conceived the study, designed the study, obtained the funding, and helped write the draft protocol. All authors read and approved the final protocol.

## Acknowledgements

This systematic review was funded by the Canadian Institutes of Health Research/Drug Safety and Effectiveness Network (CIHR/DSEN). ACT and BH are funded by a CIHR/DSEN New Investigator Award in Knowledge Synthesis. BRH receives funding from the Alberta Heritage Foundation for Medical Research. DM is funded by a University of Ottawa Research Chair. SES is funded by a Tier 1 Canada Research Chair in Knowledge Translation. We thank Laure Perrier for conducting the literature searches and Becky Skidmore for peer reviewing the MEDLINE search strategy. We also thank Dr. Joseph Beyene for providing feedback on our original proposal and Wing Hui and Judy Tran for formatting the paper.

## Author details

<sup>1</sup>Li Ka Shing Knowledge Institute, St. Michael's Hospital, 209 Victoria Street, East Building, Toronto, Ontario M5B 1 T8, Canada. <sup>2</sup>Institute of Health Policy Management and Evaluation, University of Toronto, Health Sciences Building, 155 College Street, Suite 425, Toronto, Ontario M5T 3 M6, Canada. <sup>3</sup>Clinical Epidemiology Program, Centre for Practice-Changing Research, Ottawa Hospital Research Institute, The Ottawa Hospital – General Campus and University of Ottawa, 501 Smyth Road, Box 711, Ottawa, Ontario K1H 8 L6, Canada. <sup>4</sup>Departments of Medicine and Community Health Sciences,

University of Calgary, TRW Building, 3rd Floor, 3280 Hospital Drive NW, Calgary, Alberta T2N 4Z6, Canada. <sup>5</sup>The Hospital for Sick Children, 555 University Avenue, Toronto, Ontario M5G 1X8, Canada. <sup>6</sup>Department of Pediatrics, University of Toronto, 172 St. George Street, Toronto, Ontario M5R 0A3, Canada. <sup>7</sup>Department of Pharmacology and Toxicology, University of Toronto, Medical Sciences Building, 1 King's College Circle, Room 4207, Toronto, Ontario M5S 1A8, Canada. <sup>8</sup>Department of Geriatric Medicine, University of Toronto, 172 St. George Street, Toronto, Ontario M5R 0A3, Canada.

Received: 9 April 2014 Accepted: 17 June 2014

Published: 25 June 2014

## References

- Hauser WA, Hesdorffer D: *Epilepsy, Frequency, Causes and Consequences*. New York: Demos Publications; 1990.
- Wiebe S, Bellhouse DR, Fallahay C, Eliasziw M: **Burden of epilepsy: the Ontario Health Survey**. *Can J Neurol Sci* 1999, **26**(4):263–270.
- Sperling MR: **The consequences of uncontrolled epilepsy**. *CNS Spectr* 2004, **9**(2):98–101. 106–109.
- Jones MW: **Consequences of epilepsy: why do we treat seizures?** *Can J Neurol Sci* 1998, **25**(4):S24–S26.
- Dickenson AH, Ghandehari J: **Anti-convulsants and anti-depressants**. *Handb Exp Pharmacol* 2007, **177**:145–177.
- Stefani A, Spadoni F, Bernardi G: **Voltage-activated calcium channels: targets of antiepileptic drug therapy?** *Epilepsia* 1997, **38**(9):959–965.
- Snutch TP, Reiner PB: **Ca<sup>2+</sup> channels: diversity of form and function**. *Curr Opin Neurobiol* 1992, **2**(3):247–253.
- Spina E, Perugi G: **Antiepileptic drugs: indications other than epilepsy**. *Epileptic Disord* 2004, **6**(2):57–75.
- Harden CL, Pennell PB, Koppel BS, Hovinga CA, Gidal B, Meador KJ, Hopp J, Ting TY, Hauser WA, Thurman D, Kaplan PW, Robinson JN, French JA, Wiebe S, Wilner AN, Vazquez B, Holmes L, Krumholz A, Finnell R, Shafer PO, Le Guen CL, American Academy of Neurology; American Epilepsy Society: **Management issues for women with epilepsy–focus on pregnancy (an evidence-based review): III. Vitamin K, folic acid, blood levels, and breast-feeding: report of the quality standards subcommittee and therapeutics and technology assessment subcommittee of the American Academy of Neurology and the American Epilepsy Society**. *Epilepsia* 2009, **50**(5):1247–1255.
- Harden CL, Meador KJ, Pennell PB, Hauser WA, Gronseth GS, French JA, Wiebe S, Thurman D, Koppel BS, Kaplan PW, Robinson JN, Hopp J, Ting TY, Gidal B, Hovinga CA, Wilner AN, Vazquez B, Holmes L, Krumholz A, Finnell R, Hirtz D, Le Guen C, American Academy of Neurology; American Epilepsy Society: **Management issues for women with epilepsy-Focus on pregnancy (an evidence-based review): II. Teratogenesis and perinatal outcomes: Report of the Quality Standards Subcommittee and Therapeutics and Technology Subcommittee of the American Academy of Neurology and the American Epilepsy Society**. *Epilepsia* 2009, **50**(5):1237–1246.
- Samren EB, van Duijn CM, Koch S, Hiilesmaa VK, Klepel H, Bardy AH, Mannagetta GB, Deichl AW, Gaily E, Granstrom ML, Meinardi H, Grobbee DE, Hofman A, Janz D, Lindhout D: **Maternal use of antiepileptic drugs and the risk of major congenital malformations: a joint European prospective study of human teratogenesis associated with maternal epilepsy**. *Epilepsia* 1997, **38**(9):981–990.
- Meador K, Reynolds MW, Crean S, Fahrback K, Probst C: **Pregnancy outcomes in women with epilepsy: a systematic review and meta-analysis of published pregnancy registries and cohorts**. *Epilepsia Res* 2008, **81**(1):1–13.
- Adab N, Jacoby A, Smith D, Chadwick D: **Additional educational needs in children born to mothers with epilepsy**. *J Neurol Neurosurg Psychiatry* 2001, **70**(1):15–21.
- Adab N, Kini U, Vinten J, Ayres J, Baker G, Clayton-Smith J, Coyle H, Fryer A, Gorry J, Gregg J, Mawer G, Nicolaidis P, Pickering L, Tunnicliffe L, Chadwick DW: **The longer term outcome of children born to mothers with epilepsy**. *J Neurol Neurosurg Psychiatry* 2004, **75**(11):1575–1583.
- Gaily E, Kantola-Sorsa E, Hiilesmaa V, Isoaho M, Matila R, Kotila M, Nylund T, Bardy A, Kaaja E, Granstrom ML: **Normal intelligence in children with prenatal exposure to carbamazepine**. *Neurology* 2004, **62**(1):28–32.
- Meador KJ, Baker GA, Browning N, Clayton-Smith J, Combs-Cantrell DT, Cohen M, Kalayjian LA, Kanner A, Liporace JD, Pennell PB, Privitera M, Loring DW, for the NEAD Study Group: **Cognitive function at 3 years of age after fetal exposure to antiepileptic drugs**. *N Engl J Med* 2009, **360**(16):1597–1605.

<http://www.systematicreviewsjournal.com/content/3/1/68>

17. Holmes LB, Wyszynski DF, Lieberman E: **The AED (antiepileptic drug) pregnancy registry: a 6-year experience.** *Arch Neurol* 2004, **61**(5):673–678.
18. Reinisch JM, Sanders SA, Mortensen EL, Rubin DB: **In utero exposure to phenobarbital and intelligence deficits in adult men.** *JAMA* 1995, **274**(19):1518–1525.
19. Morrow J, Russell A, Guthrie E, Parsons L, Robertson I, Waddell R, Irwin B, McGivern RC, Morrison PJ, Craig J: **Malformation risks of antiepileptic drugs in pregnancy: a prospective study from the UK Epilepsy and Pregnancy Register.** *J Neurol Neurosurg Psychiatry* 2006, **77**(2):193–198.
20. Meador KJ, Baker GA, Finnell RH, Kalayjian LA, Liporace JD, Loring DW, Mawer G, Pennell PB, Smith JC, Wolff MC, NEAD Study Group: **In utero antiepileptic drug exposure: fetal death and malformations.** *Neurology* 2006, **67**(3):407–412.
21. Vajda FJ, Hitchcock A, Graham J, Solinas C, O'Brien TJ, Lander CM, Eadie MJ: **Foetal malformations and seizure control: 52 months data of the Australian Pregnancy Registry.** *Eur J Neurol* 2006, **13**(6):645–654.
22. Holmes LB, Baldwin EJ, Smith CR, Habecker E, Glassman L, Wong SL, Wyszynski DF: **Increased frequency of isolated cleft palate in infants exposed to lamotrigine during pregnancy.** *Neurology* 2008, **70**(22 Pt 2):2152–2158.
23. Meador KJ, Penovich P, Baker GA, Pennell PB, Bromfield E, Pack A, Liporace JD, Sam M, Kalayjian LA, Thurman DJ, Moore E, Loring DW, NEAD Study Group: **Antiepileptic drug use in women of childbearing age.** *Epilepsy Behav* 2009, **15**(3):339–343.
24. Moher D, Shamseer L, Clarke M, Ghersi D, Liberati A, Petticrew M, Shekelle P, Stewart L: **Reporting Guidelines for Systematic Review Protocols.** In *19th Cochrane Colloquium: 19–22 October 2011; Madrid, Spain.*
25. Ross CJ, Visscher H, Sistonen J, Brunham LR, Pussegoda K, Loo TT, Rieder MJ, Koren G, Carleton BC, Hayden MR, CPNDS Consortium: **The Canadian Pharmacogenomics Network for Drug Safety: a model for safety pharmacology.** *Thyroid* 2010, **20**(7):681–687.
26. Eypasch E, Lefering R, Kum CK, Troidl H: **Probability of adverse events that have not yet occurred: a statistical reminder.** *BMJ* 1995, **311**(7005):619–620.
27. Atkins D: **Creating and synthesizing evidence with decision makers in mind: integrating evidence from clinical trials and other study designs.** *Med Care* 2007, **45**(10 Suppl 2):S16–S22.
28. *Health Canada: Drug Product Database.* <http://www.hc-sc.gc.ca/dhp-mps/prodpharma/databasdon/index-eng.php>.
29. *United States National Library of Medicine's ChemIDPlus Lite Database.* <http://chem.sis.nlm.nih.gov/chemidplus/chemidlite.jsp>.
30. *Canadian Pharmacists Association: E-CPS (Compendium of Pharmaceuticals and Specialties).* <http://www.e-therapeutics.ca/home.whatsnew.action>.
31. *Epilepsy Canada: Anticonvulsant Medications.* <http://www.epilepsy.ca/en-CA/Diagnosis-and-Treatment/Anticonvulsant-Medications.html>.
32. *Epilepsy Ontario: Anticonvulsant/Anti-Seizure Medication from A to Z.* <http://epilepsyontario.org/anticonvulsantanti-seizure-medication-from-a-to-z/>.
33. Sampson M, McGowan J, Cogo E, Grimshaw J, Moher D, Lefebvre C: **An evidence-based practice guideline for the peer review of electronic search strategies.** *J Clin Epidemiol* 2009, **62**(9):944–952.
34. *Canadian Agency for Drugs and Technologies in Health: Grey Matters: A Practical Search Tool for Evidence-Based Medicine.* <http://www.cadth.ca/resources/grey-matters>.
35. Adab N, Tudur SC, Vinten J, Williamson P, Winterbottom J: **Common antiepileptic drugs in pregnancy in women with epilepsy.** *Cochrane Database Syst Rev* 2004, **3**:CD004848.
36. Banach R, Boskovic R, Einarson T, Koren G: **Long-term developmental outcome of children of women with epilepsy, unexposed or exposed prenatally to antiepileptic drugs: a meta-analysis of cohort studies.** *Drug Saf* 2010, **33**(1):73–79.
37. Landis JR, Koch GG: **The measurement of observer agreement for categorical data.** *Biometrics* 1977, **33**(1):159–174.
38. *SynthesiSR.* <http://knowledgetranslation.ca/sysrev/login.php>.
39. Stone PW: **Popping the (PICO) question in research and evidence-based practice.** *Appl Nurs Res* 2002, **15**(3):197–198.
40. *Cochrane Effective Practice and Organization of Care Group Draft Risk of Bias Tool.* <http://epoc.cochrane.org/epoc-author-resources>.
41. *The Newcastle-Ottawa Scale (NOS) for Assessing the Quality of Nonrandomised Studies in Meta-Analyses.* [http://www.ohri.ca/programs/clinical\\_epidemiology/oxford.asp](http://www.ohri.ca/programs/clinical_epidemiology/oxford.asp).
42. Santaguida PL, Raina P, Ismaila A: *The Development of the McHarm Quality Assessment Scale for Adverse Events.* Hamilton, Ontario: McMaster University; 2008.
43. Raudenbush SW: **Analyzing Effect Sizes: Random Effects Models.** In *The Handbook of Research Synthesis and Meta-analysis.* 2nd edition. Edited by Cooper H, Hedges LV, Valentine JC. New York: Russell Sage Foundation; 2009:295–315.
44. Viechtbauer W: **Bias and efficiency of meta-analytic variance estimators in the random-effects model.** *J Educ Behav Stat* 2005, **30**(3):261–293.
45. Higgins JP, Thompson SG: **Quantifying heterogeneity in a meta-analysis.** *Stat Med* 2002, **21**(11):1539–1558.
46. Viechtbauer W: **Confidence intervals for the amount of heterogeneity in meta-analysis.** *Stat Med* 2007, **26**(1):37–52.
47. Higgins JPT, Green S: *Cochrane Handbook for Systematic Reviews of Interventions.* The Cochrane Collaboration; 2009. <http://www.cochrane.org/handbook>.
48. Sweeting MJ, Sutton AJ, Lambert PC: **What to add to nothing? Use and avoidance of continuity corrections in meta-analysis of sparse data.** *Stat Med* 2004, **23**(9):1351–1375.
49. Bradburn MJ, Deeks JJ, Berlin JA, Russell Localio A: **Much ado about nothing: a comparison of the performance of meta-analytical methods with rare events.** *Stat Med* 2007, **26**(1):53–77.
50. Littell JH, Corcoran J, Pillai V: *Systematic Reviews and Meta-Analysis.* New York: Oxford University Press; 2008.
51. Carpenter J, Rucker G, Schwarzer G: **Assessing the sensitivity of meta-analysis to selection bias: a multiple imputation approach.** *Biometrics* 2011, **67**(3):1066–1072.
52. *Conducting Meta-Analyses in R with the metafor Package.* <http://www.jstatsoft.org/v36/i03/>.
53. Salanti G, Ades AE, Ioannidis JP: **Graphical methods and numerical summaries for presenting results from multiple-treatment meta-analysis: an overview and tutorial.** *J Clin Epidemiol* 2011, **64**(2):163–171.
54. Salanti G: **Indirect and mixed-treatment comparison, network, or multiple-treatments meta-analysis: many names, many benefits, many concerns for the next generation evidence synthesis tool.** *Res Synth Methods* 2012, **3**(2):80–97.
55. Song F, Altman DG, Glenny AM, Deeks JJ: **Validity of indirect comparison for estimating efficacy of competing interventions: empirical evidence from published meta-analyses.** *BMJ* 2003, **326**(7387):472.
56. Veroniki AA, Vasiliadis HS, Higgins JP, Salanti G: **Evaluation of inconsistency in networks of interventions.** *Int J Epidemiol* 2013, **42**(1):332–345.
57. Dias S, Welton NJ, Caldwell DM, Ades AE: **Checking consistency in mixed treatment comparison meta-analysis.** *Stat Med* 2010, **29**(7–8):932–944.
58. White IR, Barrett JK, Jackson D, Higgins JPT: **Consistency and inconsistency in network meta-analysis: model estimation using multivariate meta-regression.** *Res Synth Methods* 2012, **3**(2):111–125.
59. Jackson D, Barrett JK, Stephen R, White IR, Higgins JPT: **A design-by-treatment interaction model for network meta-analysis with random inconsistency effects.** *Stat Med* 2014, In press.
60. White IR: **Multivariate random-effects meta-regression: updates to mvmeta.** *Stata J* 2011, **11**(2):255–270.
61. Centers for Disease Control and Prevention: *Unintended Pregnancy Prevention.* <http://www.cdc.gov/reproductivehealth/unintendedpregnancy/>.
62. Yerby MS: **Pregnancy, teratogenesis, and epilepsy.** *Neurol Clin* 1994, **12**(4):749–771.

doi:10.1186/2046-4053-3-68

**Cite this article as:** Tricco et al.: Comparative safety of anti-epileptic drugs among infants and children exposed *in utero* or during breastfeeding: protocol for a systematic review and network meta-analysis. *Systematic Reviews* 2014 **3**:68.

## PRISMA NMA Checklist

| Section/Topic             | Item # | Checklist Item*                                                                                                                                                                                                                                                                                                                                                                                                                                                                                                                                                                                                                                                                                                                                                                        | Reported on Page # |
|---------------------------|--------|----------------------------------------------------------------------------------------------------------------------------------------------------------------------------------------------------------------------------------------------------------------------------------------------------------------------------------------------------------------------------------------------------------------------------------------------------------------------------------------------------------------------------------------------------------------------------------------------------------------------------------------------------------------------------------------------------------------------------------------------------------------------------------------|--------------------|
| <b>TITLE</b>              |        |                                                                                                                                                                                                                                                                                                                                                                                                                                                                                                                                                                                                                                                                                                                                                                                        |                    |
| Title                     | 1      | Identify the report as a systematic review <i>incorporating a network meta-analysis (or related form of meta-analysis).</i>                                                                                                                                                                                                                                                                                                                                                                                                                                                                                                                                                                                                                                                            | 1                  |
| <b>ABSTRACT</b>           |        |                                                                                                                                                                                                                                                                                                                                                                                                                                                                                                                                                                                                                                                                                                                                                                                        |                    |
| Structured summary        | 2      | Provide a structured summary including, as applicable:<br><b>Background:</b> main objectives<br><b>Methods:</b> data sources; study eligibility criteria, participants, and interventions; study appraisal; and <i>synthesis methods, such as network meta-analysis.</i><br><b>Results:</b> number of studies and participants identified; summary estimates with corresponding confidence/credible intervals; <i>treatment rankings may also be discussed. Authors may choose to summarize pairwise comparisons against a chosen treatment included in their analyses for brevity.</i><br><b>Discussion/Conclusions:</b> limitations; conclusions and implications of findings.<br><b>Other:</b> primary source of funding; systematic review registration number with registry name. | 4-5                |
| <b>INTRODUCTION</b>       |        |                                                                                                                                                                                                                                                                                                                                                                                                                                                                                                                                                                                                                                                                                                                                                                                        |                    |
| Rationale                 | 3      | Describe the rationale for the review in the context of what is already known, <i>including mention of why a network meta-analysis has been conducted.</i>                                                                                                                                                                                                                                                                                                                                                                                                                                                                                                                                                                                                                             | 7                  |
| Objectives                | 4      | Provide an explicit statement of questions being addressed, with reference to participants, interventions, comparisons, outcomes, and study design (PICOS).                                                                                                                                                                                                                                                                                                                                                                                                                                                                                                                                                                                                                            | 7                  |
| <b>METHODS</b>            |        |                                                                                                                                                                                                                                                                                                                                                                                                                                                                                                                                                                                                                                                                                                                                                                                        |                    |
| Protocol and registration | 5      | Indicate whether a review protocol exists and if and where it can be accessed (e.g., Web address); and, if available, provide registration information, including registration number.                                                                                                                                                                                                                                                                                                                                                                                                                                                                                                                                                                                                 | 8                  |

|    |                                        |    |                                                                                                                                                                                                                                                                                                                                                                                   |
|----|----------------------------------------|----|-----------------------------------------------------------------------------------------------------------------------------------------------------------------------------------------------------------------------------------------------------------------------------------------------------------------------------------------------------------------------------------|
| 1  |                                        |    |                                                                                                                                                                                                                                                                                                                                                                                   |
| 2  |                                        |    |                                                                                                                                                                                                                                                                                                                                                                                   |
| 3  | Eligibility criteria                   | 6  | Specify study characteristics (e.g., PICOS, length of follow-up) and report characteristics (e.g., years considered, language, publication status) used as criteria for eligibility, giving rationale. <i>Clearly describe eligible treatments included in the treatment network, and note whether any have been clustered or merged into the same node (with justification).</i> |
| 4  |                                        |    | 8                                                                                                                                                                                                                                                                                                                                                                                 |
| 5  |                                        |    |                                                                                                                                                                                                                                                                                                                                                                                   |
| 6  |                                        |    |                                                                                                                                                                                                                                                                                                                                                                                   |
| 7  |                                        |    |                                                                                                                                                                                                                                                                                                                                                                                   |
| 8  |                                        |    |                                                                                                                                                                                                                                                                                                                                                                                   |
| 9  |                                        |    |                                                                                                                                                                                                                                                                                                                                                                                   |
| 10 |                                        |    |                                                                                                                                                                                                                                                                                                                                                                                   |
| 11 |                                        |    |                                                                                                                                                                                                                                                                                                                                                                                   |
| 12 |                                        |    |                                                                                                                                                                                                                                                                                                                                                                                   |
| 13 | Information sources                    | 7  | Describe all information sources (e.g., databases with dates of coverage, contact with study authors to identify additional studies) in the search and date last searched.                                                                                                                                                                                                        |
| 14 |                                        |    | 9                                                                                                                                                                                                                                                                                                                                                                                 |
| 15 |                                        |    |                                                                                                                                                                                                                                                                                                                                                                                   |
| 16 |                                        |    |                                                                                                                                                                                                                                                                                                                                                                                   |
| 17 | Search                                 | 8  | Present full electronic search strategy for at least one database, including any limits used, such that it could be repeated.                                                                                                                                                                                                                                                     |
| 18 |                                        |    | Additional File 1                                                                                                                                                                                                                                                                                                                                                                 |
| 19 |                                        |    |                                                                                                                                                                                                                                                                                                                                                                                   |
| 20 |                                        |    |                                                                                                                                                                                                                                                                                                                                                                                   |
| 21 | Study selection                        | 9  | State the process for selecting studies (i.e., screening, eligibility, included in systematic review, and, if applicable, included in the meta-analysis).                                                                                                                                                                                                                         |
| 22 |                                        |    | 9                                                                                                                                                                                                                                                                                                                                                                                 |
| 23 |                                        |    |                                                                                                                                                                                                                                                                                                                                                                                   |
| 24 |                                        |    |                                                                                                                                                                                                                                                                                                                                                                                   |
| 25 |                                        |    |                                                                                                                                                                                                                                                                                                                                                                                   |
| 26 | Data collection process                | 10 | Describe method of data extraction from reports (e.g., piloted forms, independently, in duplicate) and any processes for obtaining and confirming data from investigators.                                                                                                                                                                                                        |
| 27 |                                        |    | 9                                                                                                                                                                                                                                                                                                                                                                                 |
| 28 |                                        |    |                                                                                                                                                                                                                                                                                                                                                                                   |
| 29 |                                        |    |                                                                                                                                                                                                                                                                                                                                                                                   |
| 30 |                                        |    |                                                                                                                                                                                                                                                                                                                                                                                   |
| 31 | Data items                             | 11 | List and define all variables for which data were sought (e.g., PICOS, funding sources) and any assumptions and simplifications made.                                                                                                                                                                                                                                             |
| 32 |                                        |    | Additional File 1                                                                                                                                                                                                                                                                                                                                                                 |
| 33 |                                        |    |                                                                                                                                                                                                                                                                                                                                                                                   |
| 34 | Geometry of the network                | S1 | Describe methods used to explore the geometry of the treatment network under study and potential biases related to it. This should include how the evidence base has been graphically summarized for presentation, and what characteristics were compiled and used to describe the evidence base to readers.                                                                      |
| 35 |                                        |    | 10-12                                                                                                                                                                                                                                                                                                                                                                             |
| 36 |                                        |    |                                                                                                                                                                                                                                                                                                                                                                                   |
| 37 |                                        |    |                                                                                                                                                                                                                                                                                                                                                                                   |
| 38 |                                        |    |                                                                                                                                                                                                                                                                                                                                                                                   |
| 39 |                                        |    |                                                                                                                                                                                                                                                                                                                                                                                   |
| 40 |                                        |    |                                                                                                                                                                                                                                                                                                                                                                                   |
| 41 |                                        |    |                                                                                                                                                                                                                                                                                                                                                                                   |
| 42 | Risk of bias within individual studies | 12 | Describe methods used for assessing risk of bias of individual studies (including specification of whether this was done at the study or outcome level), and how this information is to be used in any data synthesis.                                                                                                                                                            |
| 43 |                                        |    | 9-10 (see also Appendix A)                                                                                                                                                                                                                                                                                                                                                        |
| 44 |                                        |    |                                                                                                                                                                                                                                                                                                                                                                                   |
| 45 |                                        |    |                                                                                                                                                                                                                                                                                                                                                                                   |
| 46 |                                        |    |                                                                                                                                                                                                                                                                                                                                                                                   |
| 47 |                                        |    |                                                                                                                                                                                                                                                                                                                                                                                   |
| 48 | Summary measures                       | 13 | State the principal summary measures (e.g., risk ratio, difference in means). <i>Also describe the use of additional summary measures assessed, such as treatment rankings and surface under the cumulative ranking curve (SUCRA) values, as well as modified approaches used to present summary findings from meta-analyses.</i>                                                 |
| 49 |                                        |    | 10-12                                                                                                                                                                                                                                                                                                                                                                             |
| 50 |                                        |    |                                                                                                                                                                                                                                                                                                                                                                                   |
| 51 |                                        |    |                                                                                                                                                                                                                                                                                                                                                                                   |
| 52 |                                        |    |                                                                                                                                                                                                                                                                                                                                                                                   |
| 53 |                                        |    |                                                                                                                                                                                                                                                                                                                                                                                   |
| 54 |                                        |    |                                                                                                                                                                                                                                                                                                                                                                                   |
| 55 |                                        |    |                                                                                                                                                                                                                                                                                                                                                                                   |
| 56 |                                        |    |                                                                                                                                                                                                                                                                                                                                                                                   |
| 57 |                                        |    |                                                                                                                                                                                                                                                                                                                                                                                   |
| 58 |                                        |    |                                                                                                                                                                                                                                                                                                                                                                                   |
| 59 |                                        |    |                                                                                                                                                                                                                                                                                                                                                                                   |
| 60 |                                        |    |                                                                                                                                                                                                                                                                                                                                                                                   |

|                                                                      |                                          |           |                                                                                                                                                                                                                                                                                                                                                                                                                                                   |                             |
|----------------------------------------------------------------------|------------------------------------------|-----------|---------------------------------------------------------------------------------------------------------------------------------------------------------------------------------------------------------------------------------------------------------------------------------------------------------------------------------------------------------------------------------------------------------------------------------------------------|-----------------------------|
| 1<br>2<br>3<br>4<br>5<br>6<br>7<br>8<br>9<br>10<br>11<br>12<br>13    | Planned methods of analysis              | 14        | Describe the methods of handling data and combining results of studies for each network meta-analysis. This should include, but not be limited to: <ul style="list-style-type: none"> <li>• <i>Handling of multi-arm trials;</i></li> <li>• <i>Selection of variance structure;</i></li> <li>• <i>Selection of prior distributions in Bayesian analyses; and</i></li> <li>• <i>Assessment of model fit.</i></li> </ul>                            | 10-12                       |
| 14<br>15<br>16<br>17<br>18                                           | Assessment of Inconsistency              | <b>S2</b> | Describe the statistical methods used to evaluate the agreement of direct and indirect evidence in the treatment network(s) studied. Describe efforts taken to address its presence when found.                                                                                                                                                                                                                                                   | 10-11                       |
| 19<br>20<br>21<br>22                                                 | Risk of bias across studies              | 15        | Specify any assessment of risk of bias that may affect the cumulative evidence (e.g., publication bias, selective reporting within studies).                                                                                                                                                                                                                                                                                                      | 9-10                        |
| 23<br>24<br>25<br>26<br>27<br>28<br>29<br>30<br>31<br>32<br>33<br>34 | Additional analyses                      | 16        | Describe methods of additional analyses if done, indicating which were pre-specified. This may include, but not be limited to, the following: <ul style="list-style-type: none"> <li>• Sensitivity or subgroup analyses;</li> <li>• Meta-regression analyses;</li> <li>• <i>Alternative formulations of the treatment network; and</i></li> <li>• <i>Use of alternative prior distributions for Bayesian analyses (if applicable).</i></li> </ul> | 11-12                       |
| 35<br>36<br>37                                                       | <b>RESULTS<sup>†</sup></b>               |           |                                                                                                                                                                                                                                                                                                                                                                                                                                                   |                             |
| 38<br>39<br>40<br>41<br>42                                           | Study selection                          | 17        | Give numbers of studies screened, assessed for eligibility, and included in the review, with reasons for exclusions at each stage, ideally with a flow diagram.                                                                                                                                                                                                                                                                                   | 13 and Figure 1             |
| 43<br>44<br>45<br>46                                                 | <b>Presentation of network structure</b> | <b>S3</b> | Provide a network graph of the included studies to enable visualization of the geometry of the treatment network.                                                                                                                                                                                                                                                                                                                                 | Figure 2                    |
| 47<br>48<br>49<br>50<br>51<br>52<br>53<br>54                         | <b>Summary of network geometry</b>       | <b>S4</b> | Provide a brief overview of characteristics of the treatment network. This may include commentary on the abundance of trials and randomized patients for the different interventions and pairwise comparisons in the network, gaps of evidence in the treatment network, and potential biases reflected by the network structure.                                                                                                                 | 14-18                       |
| 55<br>56<br>57<br>58<br>59<br>60                                     | Study characteristics                    | 18        | For each study, present characteristics for which data were extracted (e.g., study size, PICOS, follow-up period) and provide the citations.                                                                                                                                                                                                                                                                                                      | Table 1, Appendices D and E |



|                                      |           |                                                                                                                                                                                                                                                                                                                                                                                                                                                              |                                                           |
|--------------------------------------|-----------|--------------------------------------------------------------------------------------------------------------------------------------------------------------------------------------------------------------------------------------------------------------------------------------------------------------------------------------------------------------------------------------------------------------------------------------------------------------|-----------------------------------------------------------|
| Risk of bias within studies          | 19        | Present data on risk of bias of each study and, if available, any outcome level assessment.                                                                                                                                                                                                                                                                                                                                                                  | Appendix F                                                |
| Results of individual studies        | 20        | For all outcomes considered (benefits or harms), present, for each study: 1) simple summary data for each intervention group, and 2) effect estimates and confidence intervals. <i>Modified approaches may be needed to deal with information from larger networks.</i>                                                                                                                                                                                      | N/A<br>(data can be provided by the corresponding author) |
| Synthesis of results                 | 21        | Present results of each meta-analysis done, including confidence/credible intervals. <i>In larger networks, authors may focus on comparisons versus a particular comparator (e.g. placebo or standard care), with full findings presented in an appendix. League tables and forest plots may be considered to summarize pairwise comparisons.</i> If additional summary measures were explored (such as treatment rankings), these should also be presented. | 15-18,<br>Figure 3,<br>Appendices H, I, J                 |
| <b>Exploration for inconsistency</b> | <b>S5</b> | Describe results from investigations of inconsistency. This may include such information as measures of model fit to compare consistency and inconsistency models, <i>P</i> values from statistical tests, or summary of inconsistency estimates from different parts of the treatment network.                                                                                                                                                              | 14 (see also Appendix H)                                  |
| Risk of bias across studies          | 22        | Present results of any assessment of risk of bias across studies for the evidence base being studied.                                                                                                                                                                                                                                                                                                                                                        | 14 (see also Appendix G)                                  |
| Results of additional analyses       | 23        | Give results of additional analyses, if done (e.g., sensitivity or subgroup analyses, meta-regression analyses, <i>alternative network geometries studied, alternative choice of prior distributions for Bayesian analyses, and so forth</i> ).                                                                                                                                                                                                              | Appendix K                                                |
| <b>DISCUSSION</b>                    |           |                                                                                                                                                                                                                                                                                                                                                                                                                                                              |                                                           |
| Summary of evidence                  | 24        | Summarize the main findings, including the strength of evidence for each main outcome; consider their relevance to key groups (e.g., healthcare providers, users, and policy-makers).                                                                                                                                                                                                                                                                        | 19-21                                                     |
| Limitations                          | 25        | Discuss limitations at study and outcome level (e.g., risk of bias), and at review level (e.g., incomplete retrieval of identified research, reporting bias). <i>Comment on the validity of the assumptions, such as transitivity and consistency. Comment on any concerns regarding network geometry (e.g., avoidance of certain comparisons).</i>                                                                                                          | 21-23                                                     |

|    |                |    |                                                        |
|----|----------------|----|--------------------------------------------------------|
| 1  |                |    |                                                        |
| 2  |                |    |                                                        |
| 3  | Conclusions    | 26 | Provide a general interpretation of the results in the |
| 4  |                |    | context of other evidence, and implications for        |
| 5  |                |    | future research.                                       |
| 6  |                |    |                                                        |
| 7  |                |    |                                                        |
| 8  | <b>FUNDING</b> |    |                                                        |
| 9  | Funding        | 27 | Describe sources of funding for the systematic         |
| 10 |                |    | review and other support (e.g., supply of data);       |
| 11 |                |    | role of funders for the systematic review. This        |
| 12 |                |    | should also include information regarding whether      |
| 13 |                |    | funding has been received from manufacturers of        |
| 14 |                |    | treatments in the network and/or whether some of       |
| 15 |                |    | the authors are content experts with professional      |
| 16 |                |    | conflicts of interest that could affect use of         |
| 17 |                |    | treatments in the network.                             |
| 18 |                |    |                                                        |
| 19 |                |    |                                                        |
| 20 |                |    |                                                        |
| 21 |                |    |                                                        |
| 22 |                |    |                                                        |
| 23 |                |    |                                                        |
| 24 |                |    |                                                        |
| 25 |                |    |                                                        |
| 26 |                |    |                                                        |
| 27 |                |    |                                                        |
| 28 |                |    |                                                        |
| 29 |                |    |                                                        |
| 30 |                |    |                                                        |
| 31 |                |    |                                                        |
| 32 |                |    |                                                        |
| 33 |                |    |                                                        |
| 34 |                |    |                                                        |
| 35 |                |    |                                                        |
| 36 |                |    |                                                        |
| 37 |                |    |                                                        |
| 38 |                |    |                                                        |
| 39 |                |    |                                                        |
| 40 |                |    |                                                        |
| 41 |                |    |                                                        |
| 42 |                |    |                                                        |
| 43 |                |    |                                                        |
| 44 |                |    |                                                        |
| 45 |                |    |                                                        |
| 46 |                |    |                                                        |
| 47 |                |    |                                                        |
| 48 |                |    |                                                        |
| 49 |                |    |                                                        |
| 50 |                |    |                                                        |
| 51 |                |    |                                                        |
| 52 |                |    |                                                        |
| 53 |                |    |                                                        |
| 54 |                |    |                                                        |
| 55 |                |    |                                                        |
| 56 |                |    |                                                        |
| 57 |                |    |                                                        |
| 58 |                |    |                                                        |
| 59 |                |    |                                                        |
| 60 |                |    |                                                        |

**Abbreviations:** PICOS - population, intervention, comparators, outcomes, study design

\* Text in italics indicates wording specific to reporting of network meta-analyses that has been added to guidance from the PRISMA statement.

† Authors may wish to plan for use of appendices to present all relevant information in full detail for items in this section.

## Supplementary Online Content

---

|                                                                                                                                                                                            |    |
|--------------------------------------------------------------------------------------------------------------------------------------------------------------------------------------------|----|
| Appendix A. Newcastle-Ottawa Scale scoring guide .....                                                                                                                                     | 2  |
| Appendix B. List of included studies.....                                                                                                                                                  | 11 |
| Appendix C. Key excluded studies.....                                                                                                                                                      | 14 |
| Appendix D. Table of Individual Study characteristics.....                                                                                                                                 | 16 |
| Appendix E. Table of Patient characteristics.....                                                                                                                                          | 21 |
| Appendix F. Methodological quality of observational studies – Newcastle Ottawa Scale results                                                                                               | 23 |
| Appendix G. Comparison-adjusted funnel plots* .....                                                                                                                                        | 25 |
| Appendix H. Statistically significant network meta-analysis results along with meta-analysis results, transitivity, and inconsistency assessments.....                                     | 26 |
| Appendix I. Rank-heat plot of cognitive developmental delay, autism/dyspraxia, psychomotor developmental delay, language delay, and attention deficit hyperactivity disorder outcomes* ... | 30 |
| Appendix J. Number of studies and treatments per outcome .....                                                                                                                             | 32 |
| Appendix K. Sensitivity and network meta-regression analyses - Anti-epileptic drugs compared with Control .....                                                                            | 33 |

1  
2  
3  
4  
5  
6  
7  
8  
9  
10  
11  
12  
13  
14  
15  
16  
17  
18  
19  
20  
21  
22  
23  
24  
25  
26  
27  
28  
29  
30  
31  
32  
33  
34  
35  
36  
37  
38  
39  
40  
41  
42  
43  
44  
45  
46  
47  
48  
49

Appendix A. Newcastle-Ottawa Scale scoring guide

**COHORT Studies**

| Excel Column                                       | NOS* Answer Options**                                                                                                                                                                                                                                                                                                                                       | NOS Coding Manual*                                                                                                                                                                                                                                                                                                                                                                                                                                                                                                                                                                                                                                                                                                                                                                                                                                                                                                                                                                                              |
|----------------------------------------------------|-------------------------------------------------------------------------------------------------------------------------------------------------------------------------------------------------------------------------------------------------------------------------------------------------------------------------------------------------------------|-----------------------------------------------------------------------------------------------------------------------------------------------------------------------------------------------------------------------------------------------------------------------------------------------------------------------------------------------------------------------------------------------------------------------------------------------------------------------------------------------------------------------------------------------------------------------------------------------------------------------------------------------------------------------------------------------------------------------------------------------------------------------------------------------------------------------------------------------------------------------------------------------------------------------------------------------------------------------------------------------------------------|
| <b>RefID</b>                                       | Enter the report's RefID.                                                                                                                                                                                                                                                                                                                                   |                                                                                                                                                                                                                                                                                                                                                                                                                                                                                                                                                                                                                                                                                                                                                                                                                                                                                                                                                                                                                 |
| <b>DA</b>                                          | Enter your initials.                                                                                                                                                                                                                                                                                                                                        |                                                                                                                                                                                                                                                                                                                                                                                                                                                                                                                                                                                                                                                                                                                                                                                                                                                                                                                                                                                                                 |
| <b>First author</b>                                | Enter the first author's last name.                                                                                                                                                                                                                                                                                                                         |                                                                                                                                                                                                                                                                                                                                                                                                                                                                                                                                                                                                                                                                                                                                                                                                                                                                                                                                                                                                                 |
| <b>Year of publication</b>                         | Enter the year of the publication.                                                                                                                                                                                                                                                                                                                          |                                                                                                                                                                                                                                                                                                                                                                                                                                                                                                                                                                                                                                                                                                                                                                                                                                                                                                                                                                                                                 |
| <b>SELECTION:</b>                                  |                                                                                                                                                                                                                                                                                                                                                             |                                                                                                                                                                                                                                                                                                                                                                                                                                                                                                                                                                                                                                                                                                                                                                                                                                                                                                                                                                                                                 |
| <b>1) Representativeness of the exposed cohort</b> | <ul style="list-style-type: none"> <li>a) truly representative of the average pregnant woman taking AEDs in the community</li> <li>b) somewhat representative of the average pregnant woman taking AEDs in the community</li> <li>c) selected group of users e.g., nurses, volunteers</li> <li>d) no description of the derivation of the cohort</li> </ul> | <p>Item is assessing the representativeness of exposed individuals in the community, not the representativeness of the sample of women from some general population.</p> <p>For example, subjects derived from groups likely to contain middle class, better educated, health oriented women are likely to be representative of postmenopausal estrogen users while they are not representative of all women (e.g. members of a health maintenance organisation (HMO) will be a representative sample of estrogen users. While the HMO may have an under-representation of ethnic groups, the poor, and poorly educated, these excluded groups are not the predominant users of estrogen).</p> <p><u>Note:</u><br/>Truly representative (A) is a population-based cohort at the provincial or national levels (e.g., a sample from 2 cities is not enough). We need very 'broad' sample of the population.</p> <p>Somewhat representative (B) includes private clinics, hospital-based, or community-based.</p> |
| <b>2) Selection of the non-exposed cohort</b>      | <ul style="list-style-type: none"> <li>a) drawn from the same community as the exposed</li> </ul>                                                                                                                                                                                                                                                           | <p><u>Note:</u><br/>In our review of mostly multi-arm studies, this question pertains to the</p>                                                                                                                                                                                                                                                                                                                                                                                                                                                                                                                                                                                                                                                                                                                                                                                                                                                                                                                |

|                                                                                    |                                                                                                                                                                                                                         |                                                                                                                                                                                                                                                                                                                                                                                                                                                                                                           |
|------------------------------------------------------------------------------------|-------------------------------------------------------------------------------------------------------------------------------------------------------------------------------------------------------------------------|-----------------------------------------------------------------------------------------------------------------------------------------------------------------------------------------------------------------------------------------------------------------------------------------------------------------------------------------------------------------------------------------------------------------------------------------------------------------------------------------------------------|
|                                                                                    | cohort<br>b) drawn from a different source<br>c) no description of the derivation of the non-exposed cohort                                                                                                             | study's comparator group(s) – including “active” controls (for example, a less teratogenic AED). Therefore, this will often be ‘A’ for our studies.                                                                                                                                                                                                                                                                                                                                                       |
| <b>3) Ascertainment of exposure</b>                                                | a) secure record (e.g., surgical records)<br>b) structured interview<br>c) written self-report<br>d) no description                                                                                                     | <p><u>Note:</u><br/>         Option ‘A’ includes patient hospital records, prescription drug database, or hospital/clinic visits (e.g., patient is asked about “current” AED use during a visit with their doctor).</p> <p>Option ‘B’ includes a hospital/clinic visit, but the patients are asked to remember their AED use during pregnancy (e.g., retrospectively ascertained exposure).</p> <p>If a study used both medical records and interviews for everyone, select ‘A’.</p>                      |
| <b>4) Demonstration that outcome of interest was not present at start of study</b> | a) yes<br>b) no                                                                                                                                                                                                         | <p>In the case of mortality studies, outcome of interest is still the presence of a disease/incident, rather than death. That is to say that a statement of ‘no history of disease or incident’ earns a star (i.e. option ‘A’).</p> <p><u>Note:</u><br/>         Since our review is on pregnant women, this question is ‘A’ for all.<br/> <b>Please email us if a study involves breastfeeding women.</b></p>                                                                                            |
| <b>COMPARABILITY:</b>                                                              |                                                                                                                                                                                                                         |                                                                                                                                                                                                                                                                                                                                                                                                                                                                                                           |
| <b>1) Comparability of cohorts on the basis of the design or analysis</b>          | a) answer is BOTH B & C (i.e. study controls for age and one other important factor)<br>b) study controls for age of the women<br>c) study controls for any other important factor<br>d) study does not control for any | <p>Either exposed and non-exposed individuals must be matched in the design and/or confounders must be adjusted for in the analysis. Statements of no differences between groups or that differences were not statistically significant are not sufficient for establishing comparability.</p> <p><u>Note:</u> If the relative risk for the exposure of interest is adjusted for the confounders listed, then the groups will be considered to be comparable on each variable used in the adjustment.</p> |

1  
2  
3  
4  
5  
6  
7  
8  
9  
10  
11  
12  
13  
14  
15  
16  
17  
18  
19  
20  
21  
22  
23  
24  
25  
26  
27  
28  
29  
30  
31  
32  
33  
34  
35  
36  
37  
38  
39  
40  
41  
42  
43  
44  
45  
46  
47  
48  
49

|  |                                                |                                                                                                                                                                                                                                                                                                                                                                                                                                                                                                                                                                                                                                                                                                                                                                                                                                                                                                                                                                                                                                                                                                                                                                                                                                                                                                                                                                                                                                                                                                                                                                                         |
|--|------------------------------------------------|-----------------------------------------------------------------------------------------------------------------------------------------------------------------------------------------------------------------------------------------------------------------------------------------------------------------------------------------------------------------------------------------------------------------------------------------------------------------------------------------------------------------------------------------------------------------------------------------------------------------------------------------------------------------------------------------------------------------------------------------------------------------------------------------------------------------------------------------------------------------------------------------------------------------------------------------------------------------------------------------------------------------------------------------------------------------------------------------------------------------------------------------------------------------------------------------------------------------------------------------------------------------------------------------------------------------------------------------------------------------------------------------------------------------------------------------------------------------------------------------------------------------------------------------------------------------------------------------|
|  | <p>important factor or it is not described</p> | <p>There may be multiple ratings for this item for different categories of exposure (e.g., ever vs. never, current vs. previous or never). [A maximum of 2 stars can be allotted in this category].</p> <p><u>Note:</u><br/>The study should have initially matched the groups or presented adjusted odds ratios, AND in addition, since in our review we are analyzing each AED arm separately (instead of the whole exposed cohort), the study must also report the factor of interest <b>for ‘each AED arm’</b> (or state that <b>‘each AED arm’</b> is matched).</p> <p><b><u>Thus, there are 2 parts to this question:</u></b></p> <p>1) <u>The study should have matched/adjusted for age at whatever level of groups they were focused on (even if they aren’t our abstracted AED arms); AND</u></p> <p>2) <u>Then the study should also have reported the age for each AED arm.</u></p> <p><u>If they haven’t done both of these 2 things, it’s a ‘D’ here (unless they happen to combine these by reporting adjusted ORs for each of our AED arms).</u></p> <p>For our review, this generally pertains to <b>the comparability of the MOTHERS.</b><br/>The exception here is in studies of cognitive/psychomotor development disorders in children - when age of the children should be comparable.</p> <p>The “other important factors” here are any one of these:</p> <ul style="list-style-type: none"> <li>• history of congenital malformations (CMs), fetal losses, preterm deliveries or small babies.</li> <li>• family history of genetic problems or CMs.</li> </ul> |
|--|------------------------------------------------|-----------------------------------------------------------------------------------------------------------------------------------------------------------------------------------------------------------------------------------------------------------------------------------------------------------------------------------------------------------------------------------------------------------------------------------------------------------------------------------------------------------------------------------------------------------------------------------------------------------------------------------------------------------------------------------------------------------------------------------------------------------------------------------------------------------------------------------------------------------------------------------------------------------------------------------------------------------------------------------------------------------------------------------------------------------------------------------------------------------------------------------------------------------------------------------------------------------------------------------------------------------------------------------------------------------------------------------------------------------------------------------------------------------------------------------------------------------------------------------------------------------------------------------------------------------------------------------------|

|                                 |                                                                                                                                                                    |                                                                                                                                                                                                                                                                                                                                                                                                                                                                                                                                                                                                                                                                                                                                                                                                                                                                                                                                                                                                                                                                                                                                                                                                                      |
|---------------------------------|--------------------------------------------------------------------------------------------------------------------------------------------------------------------|----------------------------------------------------------------------------------------------------------------------------------------------------------------------------------------------------------------------------------------------------------------------------------------------------------------------------------------------------------------------------------------------------------------------------------------------------------------------------------------------------------------------------------------------------------------------------------------------------------------------------------------------------------------------------------------------------------------------------------------------------------------------------------------------------------------------------------------------------------------------------------------------------------------------------------------------------------------------------------------------------------------------------------------------------------------------------------------------------------------------------------------------------------------------------------------------------------------------|
|                                 |                                                                                                                                                                    | <ul style="list-style-type: none"> <li>• alcohol use.</li> <li>• nutritional deficiencies (e.g., lack of folic acid).</li> </ul> <p><u>Example:</u></p> <p>- Option 'B' indicates that the study initially matched groups based on the women's age (or reported adjusted ORs) AND they report the mean women's age for EACH of our arms (e.g., for Tx1, Tx2, etc.).</p>                                                                                                                                                                                                                                                                                                                                                                                                                                                                                                                                                                                                                                                                                                                                                                                                                                              |
| <b>OUTCOME:</b>                 |                                                                                                                                                                    |                                                                                                                                                                                                                                                                                                                                                                                                                                                                                                                                                                                                                                                                                                                                                                                                                                                                                                                                                                                                                                                                                                                                                                                                                      |
| <b>1) Assessment of outcome</b> | <ul style="list-style-type: none"> <li>a) independent OR blind assessment</li> <li>b) record linkage</li> <li>c) self-report</li> <li>d) no description</li> </ul> | <p>For some outcomes (e.g. fractured hip), reference to the medical record is sufficient to satisfy the requirement for confirmation of the fracture. This would not be adequate for vertebral fracture outcomes where reference to x-rays would be required.</p> <ul style="list-style-type: none"> <li>a) Independent or blind assessment stated in the paper, or confirmation of the outcome by reference to secure records (x-rays, medical records, etc.)</li> <li>b) Record linkage (e.g. identified through ICD codes on database records)</li> <li>c) Self-report (i.e. no reference to original medical records or x-rays to confirm the outcome)</li> <li>d) No description.</li> </ul> <p><u>Note:</u></p> <p>Blind (A) is if they tell us that the outcome assessors were blinded to exposures; or if the outcome is objective.</p> <p>For our purposes, we will focus on the primary outcome of interest of our systematic review, which is <u>major malformations (an objective outcome)</u>. So most of ours will be A, unless the study is only on a secondary outcome (e.g., cognitive development) and is based on the mother's self-report of their child (e.g., not a clinical examination).</p> |
| <b>2) Was follow-up</b>         | a) yes                                                                                                                                                             | An acceptable length of time should be decided before quality assessment                                                                                                                                                                                                                                                                                                                                                                                                                                                                                                                                                                                                                                                                                                                                                                                                                                                                                                                                                                                                                                                                                                                                             |

1  
2  
3  
4  
5  
6  
7  
8  
9  
10  
11  
12  
13  
14  
15  
16  
17  
18  
19  
20  
21  
22  
23  
24  
25  
26  
27  
28  
29  
30  
31  
32  
33  
34  
35  
36  
37  
38  
39  
40  
41  
42  
43  
44  
45  
46  
47  
48  
49

|                                                   |                                                                                                                                                                                                                                                                                                               |                                                                                                                                                                                                                                                                                                                                                                                                                                                                                                                                                                                                                                                                                                                                                                                                                                                                                                                                                                                                                     |
|---------------------------------------------------|---------------------------------------------------------------------------------------------------------------------------------------------------------------------------------------------------------------------------------------------------------------------------------------------------------------|---------------------------------------------------------------------------------------------------------------------------------------------------------------------------------------------------------------------------------------------------------------------------------------------------------------------------------------------------------------------------------------------------------------------------------------------------------------------------------------------------------------------------------------------------------------------------------------------------------------------------------------------------------------------------------------------------------------------------------------------------------------------------------------------------------------------------------------------------------------------------------------------------------------------------------------------------------------------------------------------------------------------|
| <p><b>long enough for outcomes to occur</b></p>   | <p>b) no</p>                                                                                                                                                                                                                                                                                                  | <p>begins (e.g. 5 yrs. for exposure to breast implants)</p> <p><u>Note:</u><br/>For this component, focus only on the outcomes that are reported in the results.<br/>For our purposes, we will focus on the primary outcome of interest of our systematic review, which is <u>major malformations</u>.</p> <ul style="list-style-type: none"> <li>• For studies focusing on ‘birth’ outcomes (i.e. malformations, preterm, fetal losses, born small), the answer is ‘A’ if they follow the groups until birth.</li> <li>• For studies focusing on cognitive developmental disorders, an adequate follow-up period (i.e. child’s age) is 4 years.</li> <li>• For studies focusing on psychomotor delays, an adequate follow-up period is the earliest point of detection of the disorder.</li> <li>• For studies focusing on neonatal seizures, an adequate follow-up period (i.e. infant’s age) is 6 months.</li> </ul>                                                                                             |
| <p><b>3) Adequacy of follow up of cohorts</b></p> | <p>a) complete follow up - all subjects accounted for</p> <p>b) subjects lost to follow up unlikely to introduce bias - small number lost (see ‘Note’), or description provided of those lost</p> <p>c) follow up rate is inadequate (see ‘Note’) and no description of those lost</p> <p>d) no statement</p> | <p>This item assesses the follow-up of the exposed and non-exposed cohorts to ensure that losses are not related to either the exposure or the outcome.</p> <p><u>Note:</u><br/><b><u>Especially check ones that start their total sample size (or figure diagram) with only the ones who had “complete” data (or only those who they had “successfully” recruited), as these are often a ‘D’ (since they don’t report on the ones NOT followed up).</u></b></p> <ul style="list-style-type: none"> <li>• For a prospective study, <math>\geq 90\%</math> follow-up rate per year is adequate (e.g., 10% dropout or less for 1 year, 20% for 2 years of follow-up, etc.). This includes missing or incomplete data, etc.</li> <li>• For a retrospective cohort study, <math>\geq 80\%</math> follow-up rate is adequate; including the ones that they could NOT recruit or who would NOT participate.</li> <li>• For a survey/mail questionnaire, <math>\geq 75\%</math> response rate is adequate. (For</li> </ul> |



a survey, a dropout rate is congruent to a survey response rate).

### CASE-CONTROL Studies

| Excel Column                               | NOS* Answer Options**                                                                                                                                                           | NOS Coding Manual*                                                                                                                                                                                                                                                                                                                                                                                                                                                                                                                                        |
|--------------------------------------------|---------------------------------------------------------------------------------------------------------------------------------------------------------------------------------|-----------------------------------------------------------------------------------------------------------------------------------------------------------------------------------------------------------------------------------------------------------------------------------------------------------------------------------------------------------------------------------------------------------------------------------------------------------------------------------------------------------------------------------------------------------|
| <b>RefID</b>                               | Enter the report's RefID.                                                                                                                                                       |                                                                                                                                                                                                                                                                                                                                                                                                                                                                                                                                                           |
| <b>DA</b>                                  | Enter your initials.                                                                                                                                                            |                                                                                                                                                                                                                                                                                                                                                                                                                                                                                                                                                           |
| <b>First author</b>                        | Enter the first author's last name.                                                                                                                                             |                                                                                                                                                                                                                                                                                                                                                                                                                                                                                                                                                           |
| <b>Year of publication</b>                 | Enter the year of the publication.                                                                                                                                              |                                                                                                                                                                                                                                                                                                                                                                                                                                                                                                                                                           |
| <b>SELECTION:</b>                          |                                                                                                                                                                                 |                                                                                                                                                                                                                                                                                                                                                                                                                                                                                                                                                           |
| <b>1) Is the case definition adequate?</b> | <ul style="list-style-type: none"> <li>a) yes, with independent validation</li> <li>b) yes, e.g., record linkage or based on self-reports</li> <li>c) no description</li> </ul> | <ul style="list-style-type: none"> <li>a) Requires some independent validation (e.g. &gt;1 person/record/time/process to extract information, or reference to primary record source such as x-rays or medical/hospital records)</li> <li>b) Record linkage (e.g. ICD codes in database) or self-report with no reference to primary record</li> <li>c) No description</li> </ul> <p><u>Note:</u><br/>This question is assessing the group of infants that have the outcome of interest (e.g., CMs) – i.e. the “cases” in a case-control study design.</p> |
| <b>2) Representativeness of the cases</b>  | <ul style="list-style-type: none"> <li>a) consecutive or obviously representative series of cases</li> <li>b) potential for selection biases, or not stated</li> </ul>          | <ul style="list-style-type: none"> <li>a) All eligible cases with outcome of interest over a defined period of time, all cases in a defined catchment area, all cases in a defined hospital or clinic, group of hospitals, health maintenance organisation, or an appropriate sample of those cases (e.g. random sample)</li> <li>b) Not satisfying requirements in part (a), or not stated.</li> </ul> <p><u>Note:</u><br/>Option ‘A’ is a population-based sample.</p>                                                                                  |
| <b>3) Selection of controls</b>            | <ul style="list-style-type: none"> <li>a) community controls</li> <li>b) hospital controls</li> <li>c) no description</li> </ul>                                                | <p>This item assesses whether the control series used in the study is derived from the same population as the cases and essentially would have been cases had the outcome been present.</p>                                                                                                                                                                                                                                                                                                                                                               |

1  
2  
3  
4  
5  
6  
7  
8  
9  
10  
11  
12  
13  
14  
15  
16  
17  
18  
19  
20  
21  
22  
23  
24  
25  
26  
27  
28  
29  
30  
31  
32  
33  
34  
35  
36  
37  
38  
39  
40  
41  
42  
43  
44  
45  
46  
47  
48  
49

|                                                                                             |                                                                                                                                                                                                                                                                                        |                                                                                                                                                                                                                                                                                                                                                                                                                                                                                                                                                                                                                                                |
|---------------------------------------------------------------------------------------------|----------------------------------------------------------------------------------------------------------------------------------------------------------------------------------------------------------------------------------------------------------------------------------------|------------------------------------------------------------------------------------------------------------------------------------------------------------------------------------------------------------------------------------------------------------------------------------------------------------------------------------------------------------------------------------------------------------------------------------------------------------------------------------------------------------------------------------------------------------------------------------------------------------------------------------------------|
|                                                                                             |                                                                                                                                                                                                                                                                                        | <p>a) Community controls (i.e. same community as cases and would be cases if had outcome)</p> <p>b) Hospital controls, within same community as cases (i.e. not another city) but derived from a hospitalised population</p> <p>c) No description</p> <p><u>Note:</u><br/>This question is assessing the group of infants that don't have the outcome (e.g., CMs) – i.e. the “controls” in a case-control study design.</p> <p>Community controls (A) includes a population-based sample.</p>                                                                                                                                                  |
| <p><b>4) Definition of controls</b></p>                                                     | <p>a) no history of disease (endpoint)</p> <p>b) no description of source</p>                                                                                                                                                                                                          | <p>a) If cases are first occurrence of outcome, then it must explicitly state that controls have no history of this outcome. If cases have new (not necessarily first) occurrence of outcome, then controls with previous occurrences of outcome of interest should not be excluded.</p> <p>b) No mention of history of outcome</p> <p><u>Note:</u><br/>Since our review is on fetal effects, this question is ‘A’ for all studies.<br/><b>Please email us if a study involves exposure during breastfeeding.</b></p>                                                                                                                          |
| <p><b>COMPARABILITY:</b></p>                                                                |                                                                                                                                                                                                                                                                                        |                                                                                                                                                                                                                                                                                                                                                                                                                                                                                                                                                                                                                                                |
| <p><b>1) Comparability of cases and controls on the basis of the design or analysis</b></p> | <p>a) answer is BOTH B &amp; C (i.e. study controls for age and one other important factor)</p> <p>b) study controls for age of the women</p> <p>c) study controls for any other important factor</p> <p>d) study does not control for any important factor or it is not described</p> | <p>Either cases and controls must be matched in the design and/or confounders must be adjusted for in the analysis. Statements of no differences between groups or that differences were not statistically significant are not sufficient for establishing comparability.</p> <p><u>Note:</u> If the odds ratio for the exposure of interest is adjusted for the confounders listed, then the groups will be considered to be comparable on each variable used in the adjustment.</p> <p>There may be multiple ratings for this item for different categories of exposure (e.g. ever vs. never, current vs. previous or never). [A maximum</p> |

1  
2  
3  
4  
5  
6  
7  
8  
9  
10  
11  
12  
13  
14  
15  
16  
17  
18  
19  
20  
21  
22  
23  
24  
25  
26  
27  
28  
29  
30  
31  
32  
33  
34  
35  
36  
37  
38  
39  
40  
41  
42  
43  
44  
45  
46  
47  
48  
49

|                                         |                                                                                                                                                                                                                    |                                                                                                                                                                                                                                                                                                                                                                                                                                                                                                                                                                                                                                                                                                                                                                                                                                                                                                                                                                                                                                                                                                                                                                                                 |
|-----------------------------------------|--------------------------------------------------------------------------------------------------------------------------------------------------------------------------------------------------------------------|-------------------------------------------------------------------------------------------------------------------------------------------------------------------------------------------------------------------------------------------------------------------------------------------------------------------------------------------------------------------------------------------------------------------------------------------------------------------------------------------------------------------------------------------------------------------------------------------------------------------------------------------------------------------------------------------------------------------------------------------------------------------------------------------------------------------------------------------------------------------------------------------------------------------------------------------------------------------------------------------------------------------------------------------------------------------------------------------------------------------------------------------------------------------------------------------------|
|                                         |                                                                                                                                                                                                                    | <p>of 2 stars can be allotted in this category].</p> <p><u>Note:</u><br/>The study should have initially matched the groups, AND in addition, since in our review we are analyzing each AED arm separately (instead of the whole cases group), the study must also report the factor of interest for ‘each AED arm’ (or state that ‘each AED arm’ is matched).</p> <p>For our review, this generally pertains to <b>the comparability of the MOTHERS of the cases and controls.</b><br/>The exception here is in studies of cognitive/psychomotor development disorders in children - when age of the children should be comparable.</p> <p>The “other important factors” here are any one of these:</p> <ul style="list-style-type: none"> <li>• history of congenital malformations (CMs), fetal losses, preterm deliveries or small babies.</li> <li>• family history of genetic problems or CMs.</li> <li>• alcohol use.</li> <li>• nutritional deficiencies (e.g., lack of folic acid).</li> </ul> <p>For example, Option ‘B’ indicates that the study initially matched groups based on the women’s age AND they report the mean women’s age for EACH arm (e.g., for Tx1, Tx2, etc.).</p> |
| <b>EXPOSURE:</b>                        |                                                                                                                                                                                                                    |                                                                                                                                                                                                                                                                                                                                                                                                                                                                                                                                                                                                                                                                                                                                                                                                                                                                                                                                                                                                                                                                                                                                                                                                 |
| <p><b>1) Assessment of exposure</b></p> | <p>a) secure record (e.g., surgical records)</p> <p>b) structured interview where blind to case/control status</p> <p>c) interview not blinded to case/control status</p> <p>d) written self-report or medical</p> | <p><u>Note:</u><br/>Option ‘A’ includes patient hospital records, prescription drug database, or hospital/clinic visits (e.g., patient is asked about “current” AED use during a visit with their doctor).</p> <p>“Interview” here includes a hospital/clinic visit, but the patients are asked to remember their AED use during pregnancy (e.g., retrospectively</p>                                                                                                                                                                                                                                                                                                                                                                                                                                                                                                                                                                                                                                                                                                                                                                                                                           |

1  
2  
3  
4  
5  
6  
7  
8  
9  
10  
11  
12  
13  
14  
15  
16  
17  
18  
19  
20  
21  
22  
23  
24  
25  
26  
27  
28  
29  
30  
31  
32  
33  
34  
35  
36  
37  
38  
39  
40  
41  
42  
43  
44  
45  
46  
47  
48  
49

|                                                               |                                                                                                      |                                                                                                                                                                                                                                                                                                                                                                                                                 |
|---------------------------------------------------------------|------------------------------------------------------------------------------------------------------|-----------------------------------------------------------------------------------------------------------------------------------------------------------------------------------------------------------------------------------------------------------------------------------------------------------------------------------------------------------------------------------------------------------------|
|                                                               | record only<br>e) no description                                                                     | ascertained exposure).                                                                                                                                                                                                                                                                                                                                                                                          |
| <b>2) Same method of ascertainment for cases and controls</b> | a) yes<br>b) no                                                                                      | <u>Note:</u><br>This question is asking whether the method of <u>ascertainment of exposure</u> was the same for ‘cases’ (with the outcome) and ‘controls’ (without the outcome; in this case-control study design).                                                                                                                                                                                             |
| <b>3) Non-response rate</b>                                   | a) same rate for both groups<br>b) non-respondents described<br>c) rate different and no designation | <u>Note:</u><br>For our review, this pertains to either the infants or the mothers of the case and control groups.<br><br>We’re allowing 10% dropout per year for a prospective study – e.g., 10% for 1 year, 20% for 2 years of follow-up, etc.<br><br>For a survey, we allow for a 75% response rate in order for it be adequate.<br><br>For a survey, a dropout rate is congruent to a survey response rate. |

\*Wells GA, Shea B, O'Connell D, Peterson J, Welch V, Losos M, Tugwell P. The Newcastle-Ottawa Scale (NOS) for assessing the quality of non-randomised studies in meta-analyses. Available at: [http://www.ohri.ca/programs/clinical\\_epidemiology/oxford.asp](http://www.ohri.ca/programs/clinical_epidemiology/oxford.asp)

\*\*In the “NOS Coding Manual” column, the first section for each item is copied straight from the NOS documentation while the lower portions in each item are our “Notes” tailored for the AED review.

## Appendix B. List of included studies

A total of 29 cohort studies<sup>1-29</sup> with 9 companion reports<sup>30-38</sup> were included:

1. Adab N, Kini U, Vinten J, et al. The longer term outcome of children born to mothers with epilepsy. *J Neurol Neurosurg Psychiatry*. 2004;75(11):1575-83.
2. Arkilo D, Hanna J, Dickens D, et al. Pregnancy and neurodevelopmental outcomes with in-utero antiepileptic agent exposure. A pilot study. *Eur J Paediatr Neurol*. 2015;19(1):37-40.
3. Bromley R, Baxter N, Calderbank R, Mawer G, Clayton-Smith J, Baker G. A comprehensive review of the language abilities of children exposed to valproate or carbamazepine in utero. American Epilepsy Society; Texas2010.
4. Bromley RL, Mawer GE, Briggs M, et al. The prevalence of neurodevelopmental disorders in children prenatally exposed to antiepileptic drugs. *J Neurol Neurosurg Psychiatry*. 2013;84(6):637-43.
5. Bromley RL, Calderbank R, Cheyne CP, et al. Cognition in school-age children exposed to levetiracetam, topiramate, or sodium valproate. *Neurology*. 2016;87(18):1943-53.
6. Christensen J, Gronborg TK, Sorensen MJ, et al. Prenatal valproate exposure and risk of autism spectrum disorders and childhood autism. *JAMA*. 2013;309(16):1696-703.
7. Cohen MJ, Meador KJ, Browning N, et al. Fetal antiepileptic drug exposure: Adaptive and emotional/behavioral functioning at age 6years. *Epilepsy Behav*. 2013;29(2):308-15.
8. Cummings C, Stewart M, Stevenson M, Morrow J, Nelson J. Neurodevelopment of children exposed in utero to lamotrigine, sodium valproate and carbamazepine. *Arch Dis Child*. 2011;96(7):643-7.
9. Dean JCS, Hailey H, Moore SJ, Lloyd DJ, Turnpenny PD, Little J. Long term health and neurodevelopment in children exposed to antiepileptic drugs before birth. *J Med Genet*. 2002;39(4):251-9.
10. D'Souza SW, Robertson IG, Donnai D, Mawer G. Fetal phenytoin exposure, hypoplastic nails, and jitteriness. *Arch Dis Child*. 1991;66(3):320-4.
11. Eriksson K, Viinikainen K, Mönkkönen A, et al. Children exposed to valproate in utero—Population based evaluation of risks and confounding factors for long-term neurocognitive development. *Epilepsy Res*. 2005;65(3):189-200.
12. Gaily E. Development and growth in children of epileptic mothers: a prospective controlled study. Helsinki, Finland: University of Helsinki; 1990.
13. Gogatishvili N, Ediberidze T, Lomidze G, Tatishvili N, Kasradze S. PO-0834 Long-term Developmental Outcome Of Children Prenatally Exposed To Antiepileptic Drugs. *Arch Dis Child*. 2014;99(Suppl 2):A526.
14. Gogatishvili N, Ediberidze T, Lomidze G, Tatishvili N, Kasradze S. Cognitive outcomes of children with fetal antiepileptic drug exposure at the age of 3-6 years-preliminary data. 1st Congress of the European Academy of Neurology; Berlin: European Journal of Neurology; 2015. p. 329.
15. Hurault-Delarue C, Damase-Michel C, Finotto L, et al. Psychomotor developmental effects of prenatal exposure to psychotropic drugs: a study in EFEMERIS database. *Fundam Clin Pharmacol*. 2016;30(5):476-82.
16. Jones KL, Lacro RV, Johnson KA, Adams J. Pattern of malformations in the children of women treated with carbamazepine during pregnancy. *N Engl J Med*. 1989;320(25):1661-6.

17. Katz JM, Pacia SV, Devinsky O. Current Management of Epilepsy and Pregnancy: Fetal Outcome, Congenital Malformations, and Developmental Delay. *Epilepsy Behav.* 2001;2(2):119-23.
18. Koch S, Jager-Roman E, Losche G, Nau H, Rating D, Helge H. Antiepileptic drug treatment in pregnancy: drug side effects in the neonate and neurological outcome. *Acta Paediatr.* 1996;85(6):739-46.
19. Mawer G, Clayton-Smith J, Coyle H, Kini U. Outcome of pregnancy in women attending an outpatient epilepsy clinic: adverse features associated with higher doses of sodium valproate. *Seizure.* 2002;11(8):512-8.
20. Miskov S, Juraski RG, Fucic A, et al. Croatian Pregnant Women with Epilepsy and Effects of Antiepileptic Drugs Exposure in their Offspring - seven years of prospective surveillance. American Epilepsy Society; Texas2010.
21. Miskov S, Juraski RG, Mikula I, et al. The Croatian model of integrative prospective management of epilepsy and pregnancy. *Acta Clin Croat.* 2016;55(4):535-48.
22. Nadebaum C, Anderson VA, Vajda F, Reutens DC, Barton S, Wood AG. Language skills of school-aged children prenatally exposed to antiepileptic drugs. *Neurology.* 2011;76(8):719-26.
23. Rihtman T, Parush S, Ornoy A. Developmental outcomes at preschool age after fetal exposure to valproic acid and lamotrigine: cognitive, motor, sensory and behavioral function. *Reprod Toxicol.* 2013;41:115-25.
24. Scolnik D, Nulman I, Rovet J, et al. Neurodevelopment of children exposed in utero to phenytoin and carbamazepine monotherapy. *JAMA.* 1994;271(10):767-70.
25. Shankaran S, Woldt E, Nelson J, Bedard M, Delaney-Black V. Antenatal phenobarbital therapy and neonatal outcome. II: Neurodevelopmental outcome at 36 months. *Pediatrics.* 1996;97(5):649-52.
26. van der Pol MC, Hadders-Algra M, Huisjes HJ, Touwen BC. Antiepileptic medication in pregnancy: late effects on the children's central nervous system development. *Am J Obstet Gynecol.* 1991;164(1 Pt 1):121-8.
27. Veiby G, Engelsen BA, Gilhus NE. Early child development and exposure to antiepileptic drugs prenatally and through breastfeeding: a prospective cohort study on children of women with epilepsy. *JAMA Neurol.* 2013;70(11):1367-74.
28. Veiby G, Daltveit AK, Schjolberg S, et al. Exposure to antiepileptic drugs in utero and child development: a prospective population-based study. *Epilepsia.* 2013;54(8):1462-72.
29. Wood AG, Nadebaum C, Anderson V, et al. Prospective assessment of autism traits in children exposed to antiepileptic drugs during pregnancy. *Epilepsia.* 2015;56(7):1047-55.
30. Bromley RL, Mawer G, Clayton-Smith J, Baker GA. Autism spectrum disorders following in utero exposure to antiepileptic drugs. *Neurology.* 2008;71(23):1923-4.
31. Gaily EK, Granstrom ML, Hiilesmaa VK, Bardy AH. Head circumference in children of epileptic mothers: contributions of drug exposure and genetic background. *Epilepsy Res.* 1990;5(3):217-22.
32. Hiilesmaa V. A prospective study on maternal and fetal outcome in 139 women with epilepsy. Helsinki: University of Helsinki; 1982.
33. Hiilesmaa VK, Bardy A, Teramo K. Obstetric outcome in women with epilepsy. *Am J Obstet Gynecol.* 1985;152(5):499-504.
34. Rasalam AD, Hailey H, Williams JH, et al. Characteristics of fetal anticonvulsant syndrome associated autistic disorder. *Dev Med Child Neurol.* 2005;47(8):551-5.

- 1  
2  
3 35. Tomson T, Battino D, Bonizzoni E, et al. Antiepileptic drugs and intrauterine death: A  
4 prospective observational study from EURAP. *Neurology*. 2015;85(7):580-8.  
5  
6 36. Viinikainen K, Eriksson K, Monkkonen A, et al. The effects of valproate exposure in  
7 utero on behavior and the need for educational support in school-aged children. *Epilepsy Behav*.  
8 2006;9(4):636-40.  
9  
10 37. Vinten J, Adab N, Kini U, Gorry J, Gregg J, Baker GA. Neuropsychological effects of  
11 exposure to anticonvulsant medication in utero. *Neurology*. 2005;64(6):949-54.  
12  
13 38. Vinten J, Bromley RL, Taylor J, Adab N, Kini U, Baker GA. The behavioral  
14 consequences of exposure to antiepileptic drugs in utero. *Epilepsy Behav*. 2009;14(1):197-201.  
15  
16  
17  
18  
19  
20  
21  
22  
23  
24  
25  
26  
27  
28  
29  
30  
31  
32  
33  
34  
35  
36  
37  
38  
39  
40  
41  
42  
43  
44  
45  
46  
47  
48  
49  
50  
51  
52  
53  
54  
55  
56  
57  
58  
59  
60

For peer review only

## Appendix C. Key excluded studies

| Author, Year                   | Research Group                                                                             | Title                                                                                                                   | Reason for Exclusion                           |
|--------------------------------|--------------------------------------------------------------------------------------------|-------------------------------------------------------------------------------------------------------------------------|------------------------------------------------|
| Meador, 2009 <sup>39</sup>     | Neurodevelopmental Effects of Antiepileptic Drug (NEAD) Study Group                        | Cognitive Function at 3 Years of Age after Fetal Exposure to Antiepileptic Drugs                                        | Outcomes only reported as continuous variables |
| Meador, 2010 <sup>40</sup>     | Neurodevelopmental Effects of Antiepileptic Drug (NEAD) Study Group                        | Effects of breastfeeding in children of women taking antiepileptic drugs                                                | Outcomes only reported as continuous variables |
| Meador, 2011 <sup>41</sup>     | Neurodevelopmental Effects of Antiepileptic Drug (NEAD) Study Group                        | Foetal antiepileptic drug exposure and verbal versus non-verbal abilities at three years of age                         | Outcomes only reported as continuous variables |
| Meador, 2012 <sup>42</sup>     | Neurodevelopmental Effects of Antiepileptic Drug (NEAD) Study Group                        | Effects of fetal antiepileptic drug exposure: Outcomes at age 4.5 years                                                 | Outcomes only reported as continuous variables |
| Meador, 2013 <sup>43</sup>     | Neurodevelopmental Effects of Antiepileptic Drug (NEAD) Study Group                        | Fetal antiepileptic drug exposure and cognitive outcomes at age 6 years (NEAD study): a prospective observational study | Outcomes only reported as continuous variables |
| Shallcross, 2011 <sup>44</sup> | Liverpool and Manchester Neurodevelopment Group and The UK Epilepsy and Pregnancy Register | Child development following in utero exposure: Levetiracetam vs. sodium valproate                                       | Outcomes only reported as continuous variables |
| Shallcross, 2014 <sup>45</sup> | Liverpool and Manchester                                                                   | In utero exposure to levetiracetam vs. valproate: Development and language at 3 years of age                            | Outcomes only reported as continuous variables |



|  |                                                                            |  |  |
|--|----------------------------------------------------------------------------|--|--|
|  | Neurodevelopment<br>Group and The UK<br>Epilepsy and Pregnancy<br>Register |  |  |
|--|----------------------------------------------------------------------------|--|--|

## References

39. Meador KJ, Baker GA, Browning N, et al. Cognitive function at 3 years of age after fetal exposure to antiepileptic drugs. *N Engl J Med.* 2009;360(16):1597-605.
40. Meador KJ, Baker GA, Browning N, et al. Effects of breastfeeding in children of women taking antiepileptic drugs. *Neurology.* 2010;75(22):1954-60.
41. Meador KJ, Baker GA, Browning N, et al. Foetal antiepileptic drug exposure and verbal versus non-verbal abilities at three years of age. *Brain.* 2011;134(Pt 2):396-404.
42. Meador KJ, Baker GA, Browning N, et al. Effects of fetal antiepileptic drug exposure: outcomes at age 4.5 years. *Neurology.* 2012;78(16):1207-14.
43. Meador KJ, Baker GA, Browning N, et al. Fetal antiepileptic drug exposure and cognitive outcomes at age 6 years (NEAD study): a prospective observational study. *Lancet Neurol.* 2013;12(3):244-52.
44. Shallcross R, Bromley RL, Irwin B, Bonnett LJ, Morrow J, Baker GA. Child development following in utero exposure: levetiracetam vs sodium valproate. *Neurology.* 2011;76(4):383-9.
45. Shallcross R, Bromley RL, Cheyne CP, et al. In utero exposure to levetiracetam vs valproate: development and language at 3 years of age. *Neurology.* 2014;82(3):213-21.

## Appendix D. Table of Individual Study characteristics

| Author, Year                                                                              | Country of conduct | Registry or Setting                                                                                                                    | Study period | Interventions                        | Outcomes                                                       | Funding                |
|-------------------------------------------------------------------------------------------|--------------------|----------------------------------------------------------------------------------------------------------------------------------------|--------------|--------------------------------------|----------------------------------------------------------------|------------------------|
| Adab, 2004 <sup>*1</sup><br>[CR: Vinten 2005 <sup>37</sup> , Vinten, 2009 <sup>38</sup> ] | UK                 | Mersey Regional Epilepsy Clinic; Epilepsy Clinic at the Manchester Royal Infirmary; Antenatal clinic at St Mary's Hospital, Manchester | 2000-2001    | Carbam, Control, Valpro              | Cognitive Developmental Delay, Psychomotor Developmental Delay | NR                     |
| Arkilo, 2015 <sup>2</sup>                                                                 | USA                | Minnesota Epilepsy Group                                                                                                               | 2006-2011    | Carbam, Lamot, Levet, Pheny, Valpro  | Autism/Dyspraxia, Psychomotor Developmental Delay              | NR                     |
| Bromley, 2010 <sup>3</sup>                                                                | UK                 | Liverpool and Manchester Neurodevelopment Group                                                                                        | NR           | Carbam, Valpro                       | Language Delay                                                 | NR                     |
| Bromley, 2013 <sup>4</sup><br>[CR: Bromley, 2008 <sup>30</sup> ]                          | UK                 | Liverpool and Manchester Neurodevelopment group                                                                                        | 2000-2004    | Carbam, Control, Lamot, Valpro       | Autism/Dyspraxia, ADHD                                         | mixed public & private |
| Bromley, 2016 <sup>5†</sup>                                                               | UK                 | UK Epilepsy and Pregnancy Register                                                                                                     | 2004-2007    | Control, Gabap, Levet, Topir, Valpro | Cognitive Developmental Delay                                  | public                 |
| Christensen, 2013 <sup>6†</sup>                                                           | Denmark            | Danish Civil Registration System; Danish Prescription Register; Danish Psychiatric Central Register; Danish Birth Register; Danish     | 1996-2006    | Carbam, Clonaz, Lamot, Oxcar, Valpro | Autism/Dyspraxia                                               | public                 |

|                                                                       |                  |                                                                                             |           |                                                                                                                            |                                                                |        |
|-----------------------------------------------------------------------|------------------|---------------------------------------------------------------------------------------------|-----------|----------------------------------------------------------------------------------------------------------------------------|----------------------------------------------------------------|--------|
|                                                                       |                  | National Hospital Register                                                                  |           |                                                                                                                            |                                                                |        |
| Cohen, 2013 <sup>7</sup>                                              | USA;UK           | Neurodevelopmental Effects of Antiepileptic Drugs Study Group                               | 1999-2004 | Carbam, Lamot, Pheny, Valpro,                                                                                              | ADHD                                                           | public |
| Cummings, 2011 <sup>8</sup> † [CR: Tomson, 2015 <sup>35</sup> ]       | Northern Ireland | UK Epilepsy and Pregnancy Register (Northern Ireland); Northern Ireland Child Health System | 1996-2005 | Carbam, Lamot, Valpro,                                                                                                     | Cognitive Developmental Delay                                  | public |
| Dean, 2002 <sup>9</sup> [CR: Rasalam, 2005 <sup>34</sup> ]            | Scotland         | Aberdeen Maternity Hospital                                                                 | 1976-2000 | Carbam, Carbam+Pheno, Carbam+Pheny, Carbam+Valpro, Control, Ethos, Pheno, Pheno+Pheny, Pheno+Valpro, Pheny, Primid, Valpro | Psychomotor Developmental Delay, ADHD                          | NR     |
| D'Souza, 1991 <sup>10</sup>                                           | United Kingdom   | St Mary's Hospital                                                                          | 1980-1982 | Carbam, Control, Pheno, Pheny, Valpro                                                                                      | Cognitive Developmental Delay                                  | public |
| Eriksson, 2005 <sup>11</sup> † [CR: Viinikainen, 2006 <sup>36</sup> ] | Finland          | Kuopio University Hospital                                                                  | 1989-2000 | Carbam, Control, Valpro                                                                                                    | Cognitive Developmental Delay, Psychomotor Developmental Delay | public |

|    |                             |         |                        |       |                             |                |          |
|----|-----------------------------|---------|------------------------|-------|-----------------------------|----------------|----------|
| 1  |                             |         |                        |       |                             |                |          |
| 2  |                             |         |                        |       |                             |                |          |
| 3  |                             |         |                        |       |                             |                |          |
| 4  | Gaily, 1990 <sup>12</sup>   |         |                        |       | Carbam,                     | Cognitive      |          |
| 5  | [CR: Gaily,                 |         |                        |       | Carbam+Pheno+Pheny,         | Developmental  |          |
| 6  | 1990 <sup>31</sup> ;        | Finland | Helsinki University    | 1975- | Carbam+Pheny,               | Delay ,        | mixed    |
| 7  | Hiilesmaa,                  |         | Central Hospital       | 1979  | Carbam+Valpro, Control,     | Psychomotor    | public & |
| 8  | 1982 <sup>32</sup> ;        |         |                        |       | Ethos+Pheny, Pheno+Pheny,   | Developmental  | private  |
| 9  | Hiilesmaa,                  |         |                        |       | Pheny, Pheny+Primid,        | Delay          |          |
| 10 | 1985 <sup>33</sup> ]        |         |                        |       | Pheny+Valpro                |                |          |
| 11 |                             |         |                        |       |                             |                |          |
| 12 |                             |         |                        |       |                             |                |          |
| 13 |                             |         |                        |       |                             |                |          |
| 14 | Gogatishvili,               | Georgia | Georgian National AED- | NR    | Carbam, Lamot, Valpro       | Cognitive      |          |
| 15 | 2014 <sup>13</sup>          |         | Pregnancy Registry     |       |                             | Developmental  | public   |
| 16 |                             |         |                        |       |                             | Delay          |          |
| 17 | Gogatishvili,               | Georgia | Georgian National AED- | NR    | Carbam, Carbam+Levet,       | Language Delay | public   |
| 18 | 2015 <sup>14</sup>          |         | Pregnancy Registry     |       | Lamot, Pheno, Valpro        |                |          |
| 19 |                             |         |                        |       |                             |                |          |
| 20 |                             |         | EFEMERIS database -    |       |                             |                |          |
| 21 |                             |         | Caisse Primaire        |       |                             |                |          |
| 22 |                             |         | d'Assurance Maladie of |       |                             |                |          |
| 23 | Hurault-                    | France  | Haute-Garonne and      | 2004- | Carbam, Clobaz, Clonaz,     | Psychomotor    |          |
| 24 | Delarue, 2012 <sup>15</sup> |         | Maternal and Infant    | 2008  | Gabap, Lamot, Pheno, Topir, | Developmental  | NR       |
| 25 |                             |         | Protection Service;    |       | Valpro                      | Delay          |          |
| 26 |                             |         | Antenatal Diagnostic   |       |                             |                |          |
| 27 |                             |         | Centre                 |       |                             |                |          |
| 28 |                             |         |                        |       |                             |                |          |
| 29 |                             |         |                        |       |                             |                |          |
| 30 |                             |         |                        |       |                             |                |          |
| 31 |                             |         |                        |       |                             |                |          |
| 32 |                             |         |                        |       |                             | Cognitive      |          |
| 33 |                             |         |                        |       |                             | Developmental  |          |
| 34 | Jones, 1989 <sup>16†</sup>  | US      | California Teratogen   | 1979- | Carbam, Carbam+Pheno,       | Delay ,        | public   |
| 35 |                             |         | Registry               | 1988  | Carbam+Pheno+Valpro,        | Psychomotor    |          |
| 36 |                             |         |                        |       | Carbam+Primid               | Developmental  |          |
| 37 |                             |         |                        |       |                             | Delay          |          |
| 38 |                             |         |                        |       |                             |                |          |
| 39 | Katz, 2001 <sup>17</sup>    | USA     | Mount Sinai            | 1990- | Carbam, Control, Lamot,     | Cognitive      |          |
| 40 |                             |         | Comprehensive Epilepsy | 2000  | Pheno, Pheny, Primid,       | Developmental  | NR       |
| 41 |                             |         | Center                 |       | Valpro                      | Delay          |          |
| 42 |                             |         |                        |       |                             |                |          |
| 43 |                             |         |                        |       |                             |                |          |
| 44 |                             |         |                        |       |                             |                |          |
| 45 |                             |         |                        |       |                             |                |          |
| 46 |                             |         |                        |       |                             |                |          |
| 47 |                             |         |                        |       |                             |                |          |
| 48 |                             |         |                        |       |                             |                |          |
| 49 |                             |         |                        |       |                             |                |          |

|                                                    |                               |           |                                                                                                                        |           |                                                                                                                                         |                                                    |                        |
|----------------------------------------------------|-------------------------------|-----------|------------------------------------------------------------------------------------------------------------------------|-----------|-----------------------------------------------------------------------------------------------------------------------------------------|----------------------------------------------------|------------------------|
| 1<br>2<br>3<br>4<br>5<br>6<br>7                    | Koch, 1996 <sup>18</sup>      | Germany   | NR                                                                                                                     | 1976-1983 | Pheno, Pheny, Primid, Valpro                                                                                                            | Cognitive Developmental Delay                      | public                 |
| 8<br>9<br>10<br>11                                 | Mawer, 2002 <sup>19</sup>     | England   | Manchester Royal Infirmary                                                                                             | 1990-1999 | Carbam, Lamot, Pheny, Valpro                                                                                                            | Cognitive Developmental Delay                      | NR                     |
| 12<br>13<br>14<br>15<br>16<br>17                   | Miskov, 2010 <sup>20</sup>    | Croatia   | NR                                                                                                                     | 2003-2010 | Carbam, Control, Gabap, Lamot, Valpro                                                                                                   | Psychomotor Developmental Delay, Neonatal Seizures | NR                     |
| 18<br>19<br>20<br>21<br>22<br>23<br>24<br>25<br>26 | Miskov, 2016 <sup>21</sup>    | Croatia   | Sestre milosrdnice University Hospital Center                                                                          | 2003-2013 | Carbam, Carbam+Lamot, Carbam+Pheno, Carbam+Pheny+Topir, Control, Clonaz+Valpro, Gabap, Lamot, Oxcar, Pheno, Pheny, Topir+Valpro, Valpro | Attention Deficit Hyperactivity Disorder           | NR                     |
| 27<br>28<br>29<br>30                               | Nadebaum, 2011 <sup>22†</sup> | Australia | Australian Registry of Antiepileptic Drug Use in Pregnancy                                                             | 2007-2009 | Carbam, Lamot, Valpro                                                                                                                   | Language Delay                                     | mixed public & private |
| 31<br>32<br>33<br>34                               | Rihtman, 2013 <sup>23</sup>   | Israel    | Israeli Teratogen Information Service                                                                                  | NR        | Lamot, Valpro                                                                                                                           | Neonatal Seizure                                   | mixed public & private |
| 35<br>36<br>37<br>38<br>39<br>40<br>41<br>42<br>43 | Scolnik, 1994 <sup>24</sup>   | Canada    | Hospital for Sick Children - Motherisk Program; North York General Hospital; Toronto Hospital; Oshawa General Hospital | 1987-1992 | Carbam, Pheny                                                                                                                           | Cognitive Developmental Delay                      | public                 |

1  
2  
3  
4  
5  
6  
7  
8  
9  
10  
11  
12  
13  
14  
15  
16  
17  
18  
19  
20  
21  
22  
23  
24  
25  
26  
27  
28  
29  
30  
31  
32  
33  
34  
35  
36  
37  
38  
39  
40  
41  
42  
43  
44  
45  
46  
47  
48  
49

|                                 |             |                                                                     |           |                                                                         |                                                                         |        |
|---------------------------------|-------------|---------------------------------------------------------------------|-----------|-------------------------------------------------------------------------|-------------------------------------------------------------------------|--------|
| Shankaran, 1996 <sup>25</sup>   | USA         | Children's Hospital of Michigan                                     | NR        | Control, Pheno                                                          | Psychomotor Developmental Delay, Language Delay                         | public |
| Van der Pol, 1991 <sup>26</sup> | Netherlands | Groningen University Hospital                                       | 1973-1981 | Carbam, Carbam+Pheno, Control, Pheno                                    | Psychomotor Developmental Delay                                         | public |
| Veiby, 2013a <sup>27</sup> †    | Norway      | Norwegian Institute of Public Health- Mother and Child Cohort Study | 1999-2009 | Carbam, Control, Lamot, Valpro                                          | Social Impairment                                                       | public |
| Veiby, 2013b <sup>28</sup> †    | Norway      | Medical Birth Registry of Norway                                    | 1999-2008 | Carbam, Control, Lamot, Valpro                                          | Psychomotor Developmental Delay, Autism/Dyspraxia, Language Delay, ADHD | public |
| Wood, 2015 <sup>29</sup> †      | Australia   | Australian Registry of Antiepileptic Drug Use in Pregnancy          | 2007-2010 | Carbam, Carbam+Clonaz, Carbam+Lamot, Carbam+Pheny, Lamot+Valpro, Valpro | Autism/Dyspraxia                                                        | public |

**Abbreviations:** ADHD – Attention Deficit Hyperactivity Disorder; NR – Not Reported

Carbam = Carbamazepine; Clobaz = Clobazam; Clonaz = Clonazepam; Ethos = Ethosuximide; Gabap = Gabapentin; Lamot = Lamotrigine; Levet = Levetiracetam; Oxcar = Oxcarbazepine; Pheno = Phenobarbital; Pheny = Phenytoin; Primid = Primidone; Topir = Topiramate; Valpro = Valproate; Vigab = Viagabatratin

\*Single publication reporting on two separate cohorts

†Registry Studies

## Appendix E. Table of Patient characteristics

| Author, Year                                                                                   | Indication | Sample Size* | Mean Age (Women) | Mean Age (Children)/ Follow-up period† | AED Exposure Timing | Maternal Alcohol Use n/N‡ | Maternal Tobacco Use n/N‡ |
|------------------------------------------------------------------------------------------------|------------|--------------|------------------|----------------------------------------|---------------------|---------------------------|---------------------------|
| Adab, 2004a <sup>1</sup> §<br>[CR: Vinten 2005 <sup>37</sup> ;<br>Vinten, 2009 <sup>38</sup> ] | Epilepsy   | 177          | 26.1             | 9-10.5                                 | NR                  | 24/279‡                   | 68/249‡                   |
| Adab, 2004b <sup>1</sup> §<br>[CR: Vinten 2005 <sup>37</sup> ;<br>Vinten, 2009 <sup>38</sup> ] | Epilepsy   | 81           | 26.1             | 3-3.33                                 | NR                  | 24/279‡                   | 68/249‡                   |
| Arkilo, 2015 <sup>2</sup>                                                                      | Epilepsy   | 59           | NR               | NA                                     | First trimester     | NR                        | NR                        |
| Bromley, 2010 <sup>3</sup>                                                                     | NR         | 60           | NR               | 6-7                                    | Whole pregnancy     | NR                        | NR                        |
| Bromley, 2013 <sup>4</sup><br>[CR: Bromley, 2008 <sup>30</sup> ]                               | Epilepsy   | 156          | 28               | 6                                      | NR                  | 28/156                    | 42/156                    |
| Bromley, 2016 <sup>5</sup>                                                                     | Epilepsy   | 185          | NR               | NR                                     | NR                  | 31/185                    | 35/185                    |
| Christensen, 2013 <sup>6</sup>                                                                 | NR         | 2011         | NR               | NR                                     | Whole pregnancy     | NR                        | NR                        |
| Cohen, 2013 <sup>7</sup>                                                                       | Epilepsy   | 108          | 30               | 6                                      | NR                  | 12/192‡                   | NR                        |
| Cummings, 2011 <sup>8</sup><br>[CR: Tomson, 2015 <sup>35</sup> ]                               | Epilepsy   | 142          | NR               | 2-3                                    | Whole pregnancy     | 32/108‡                   | 19/108‡                   |
| Dean, 2002 <sup>9</sup><br>[CR: Rasalam, 2005 <sup>34</sup> ]                                  | Epilepsy   | 287          | 27               | 3.75-15.5                              | First trimester     | NR                        | NR                        |
| D'Souza, 1991 <sup>10</sup>                                                                    | Epilepsy   | 42           | 26.5             | 2.5-3.5                                | Whole pregnancy     | NR                        | NR                        |
| Eriksson, 2005 <sup>11</sup><br>[CR: Viinikainen, 2006 <sup>36</sup> ]                         | Epilepsy   | 39           | 28.2             | NR                                     | NR                  | NR                        | NR                        |

|                                                                                                                                   |          |     |      |        |                 |    |         |
|-----------------------------------------------------------------------------------------------------------------------------------|----------|-----|------|--------|-----------------|----|---------|
| Gaily, 1990 <sup>12</sup><br>[CR: Gaily, 1990 <sup>31</sup> ;<br>Hiilesmaa, 1982 <sup>32</sup> ;<br>Hiilesmaa, 1985 <sup>33</sup> | Epilepsy | 134 | 27.8 | 5.5    | First trimester | NR | NR      |
| Gogatishvili, 2014 <sup>13</sup>                                                                                                  | NR       | 39  | NR   | 2 to 4 | NR              | NR | NR      |
| Gogatishvili, 2015 <sup>14</sup>                                                                                                  | NR       | 23  | NR   | 3 to 6 | NR              | NR | NR      |
| Hurault-Delarue, 2012 <sup>15</sup>                                                                                               | NR       | 109 | NR   | 0.75   | NR              | NR | NR      |
| Jones, 1989 <sup>16</sup>                                                                                                         | Epilepsy | 63  | NR   | NR     | Whole pregnancy | NR | NR      |
| Katz, 2001 <sup>17</sup>                                                                                                          | Epilepsy | 51  | 31   | NR     | NR              | NR | NR      |
| Koch, 1996 <sup>18</sup>                                                                                                          | Epilepsy | 40  | NR   | 6      | First trimester | NR | NR      |
| Mawer, 2002 <sup>19</sup>                                                                                                         | Epilepsy | 52  | NR   | NR     | NR              | NR | NR      |
| Miskov, 2010 <sup>20</sup>                                                                                                        | Epilepsy | 55  | NR   | NR     | NR              | NR | NR      |
| Miskov, 2016 <sup>21</sup>                                                                                                        | Epilepsy | 74  | 34   | NR     | NR              | NR | 6/74    |
| Nadebaum, 2011 <sup>22</sup>                                                                                                      | Epilepsy | 66  | 31.6 | 7.4    | First trimester | NR | 5/66    |
| Rihtman, 2013 <sup>23</sup>                                                                                                       | Epilepsy | 72  | NR   | NR     | Whole pregnancy | NR | NR      |
| Scolnik, 1994 <sup>24</sup>                                                                                                       | Epilepsy | 75  | NR   | 1.5-3  | 1st trimester   | NR | NR      |
| Shankaran, 1996 <sup>25</sup>                                                                                                     | NR       | 96  | NR   | NR     | NR              | NR | NR      |
| Van der Pol, 1991 <sup>26</sup>                                                                                                   | Epilepsy | 57  | NR   | 6-13   | NR              | NR | NR      |
| Veiby, 2013a <sup>27</sup>                                                                                                        | Epilepsy | 422 | NR   | 0.5    | NR              | NR | NR      |
| Veiby, 2013b <sup>28</sup>                                                                                                        | Epilepsy | 248 | 28.9 | 3      | NR              | NR | 68/726‡ |
| Wood, 2015 <sup>29</sup>                                                                                                          | Epilepsy | 77  | NR   | 6-8    | NR              | NR | NR      |

**Abbreviations:** NA – Not applicable; NR – Not reported

\* Sample size used for analysis; ineligible treatment arms (i.e. treatment arms with excluded drugs or unspecified polytherapy) are not included in the count

† The mean age for children/follow-up period data were only collected for outcomes related to cognitive and/or psychomotor development

‡ Total sample size is based on the number of women enrolled in the study; may differ from the sample size used for analysis

§ Single publication reporting on two separate cohorts



## Appendix F. Methodological quality of observational studies – Newcastle Ottawa Scale results

| First Author, Year               | Representativeness of the exposed cohort | Selection of the non-exposed cohort | Ascertainment of exposure | Demonstration that outcome of interest was not present at start of study | Comparability of cohorts on the basis of the design or analysis | Assessment of outcome | Was follow-up long enough for outcomes to occur | Adequacy of follow up of cohorts |
|----------------------------------|------------------------------------------|-------------------------------------|---------------------------|--------------------------------------------------------------------------|-----------------------------------------------------------------|-----------------------|-------------------------------------------------|----------------------------------|
| Adab, 2004 <sup>1</sup>          | B                                        | A                                   | A                         | A                                                                        | C                                                               | A                     | A                                               | C                                |
| Arkilo, 2015 <sup>2</sup>        | B                                        | A                                   | B                         | A                                                                        | D                                                               | A                     | A                                               | C                                |
| Bromley, 2010 <sup>3</sup>       | D                                        | A                                   | D                         | A                                                                        | D                                                               | D                     | B                                               | D                                |
| Bromley, 2013 <sup>4</sup>       | A                                        | A                                   | A                         | A                                                                        | A                                                               | A                     | A                                               | C                                |
| Bromley, 2016 <sup>5</sup>       | A                                        | A                                   | A                         | A                                                                        | A                                                               | A                     | A                                               | C                                |
| Christensen, 2013 <sup>6</sup>   | A                                        | A                                   | A                         | A                                                                        | A                                                               | B                     | A                                               | B                                |
| Cohen, 2013 <sup>7</sup>         | A                                        | A                                   | D                         | A                                                                        | A                                                               | A                     | A                                               | C                                |
| Cummings, 2011 <sup>8</sup>      | A                                        | A                                   | A                         | A                                                                        | A                                                               | A                     | A                                               | C                                |
| Dean, 2002 <sup>9</sup>          | B                                        | A                                   | A                         | A                                                                        | D                                                               | A                     | A                                               | C                                |
| D'Souza, 1991 <sup>10</sup>      | B                                        | A                                   | A                         | A                                                                        | D                                                               | A                     | A                                               | A                                |
| Eriksson, 2005 <sup>11</sup>     | B                                        | A                                   | A                         | A                                                                        | B                                                               | A                     | A                                               | D                                |
| Gaily, 1990 <sup>12</sup>        | B                                        | A                                   | A                         | A                                                                        | D                                                               | A                     | A                                               | A                                |
| Gogatishvili, 2014 <sup>13</sup> | A                                        | A                                   | D                         | A                                                                        | D                                                               | A                     | A                                               | D                                |
| Gogatishvili, 2015 <sup>14</sup> | A                                        | A                                   | D                         | A                                                                        | D                                                               | A                     | A                                               | D                                |

|    |                           |   |   |   |   |   |   |   |   |
|----|---------------------------|---|---|---|---|---|---|---|---|
| 1  |                           |   |   |   |   |   |   |   |   |
| 2  |                           |   |   |   |   |   |   |   |   |
| 3  |                           |   |   |   |   |   |   |   |   |
| 4  | Hurault-                  |   |   |   |   |   |   |   |   |
| 5  | Delarue,                  | A | A | A | A | A | A | A | A |
| 6  | 2012 <sup>15</sup>        |   |   |   |   |   |   |   |   |
| 7  | Jones, 1989 <sup>16</sup> | A | A | B | A | D | A | A | B |
| 8  | Katz, 2001 <sup>17</sup>  | B | A | A | A | D | A | A | D |
| 9  | Koch, 1996 <sup>18</sup>  | B | A | B | A | D | A | A | C |
| 10 | Mawer,                    |   |   |   |   |   |   |   |   |
| 11 | 2002 <sup>19</sup>        | B | A | A | A | D | A | A | B |
| 12 | Miskov,                   |   |   |   |   |   |   |   |   |
| 13 | 2010 <sup>20</sup>        | D | A | D | A | D | D | A | D |
| 14 | Miskov,                   |   |   |   |   |   |   |   |   |
| 15 | 2016 <sup>21</sup>        | C | A | A | A | D | A | A | D |
| 16 | Nadebaum,                 |   |   |   |   |   |   |   |   |
| 17 | 2011 <sup>22</sup>        | A | A | A | A | A | A | A | B |
| 18 | Rihtman,                  |   |   |   |   |   |   |   |   |
| 19 | 2013 <sup>23</sup>        | A | B | A | A | A | A | A | C |
| 20 | Scolnik,                  |   |   |   |   |   |   |   |   |
| 21 | 1994 <sup>24</sup>        | B | A | A | A | D | A | A | A |
| 22 | Shankaran,                |   |   |   |   |   |   |   |   |
| 23 | 1996 <sup>25</sup>        | B | A | A | A | D | A | A | B |
| 24 | Van der Pol,              |   |   |   |   |   |   |   |   |
| 25 | 1991 <sup>26</sup>        | B | A | D | A | A | A | A | B |
| 26 | Veiby,                    |   |   |   |   |   |   |   |   |
| 27 | 2013a <sup>27</sup>       | A | A | A | A | A | A | A | D |
| 28 | Veiby,                    |   |   |   |   |   |   |   |   |
| 29 | 2013b <sup>28</sup>       | A | A | A | A | A | A | A | C |
| 30 | Wood, 2015 <sup>29</sup>  | A | A | A | A | D | A | A | C |

**Abbreviations:** A – low risk; B – moderate risk; C – high risk; D – unclear risk

Appendix G. Comparison-adjusted funnel plots\*

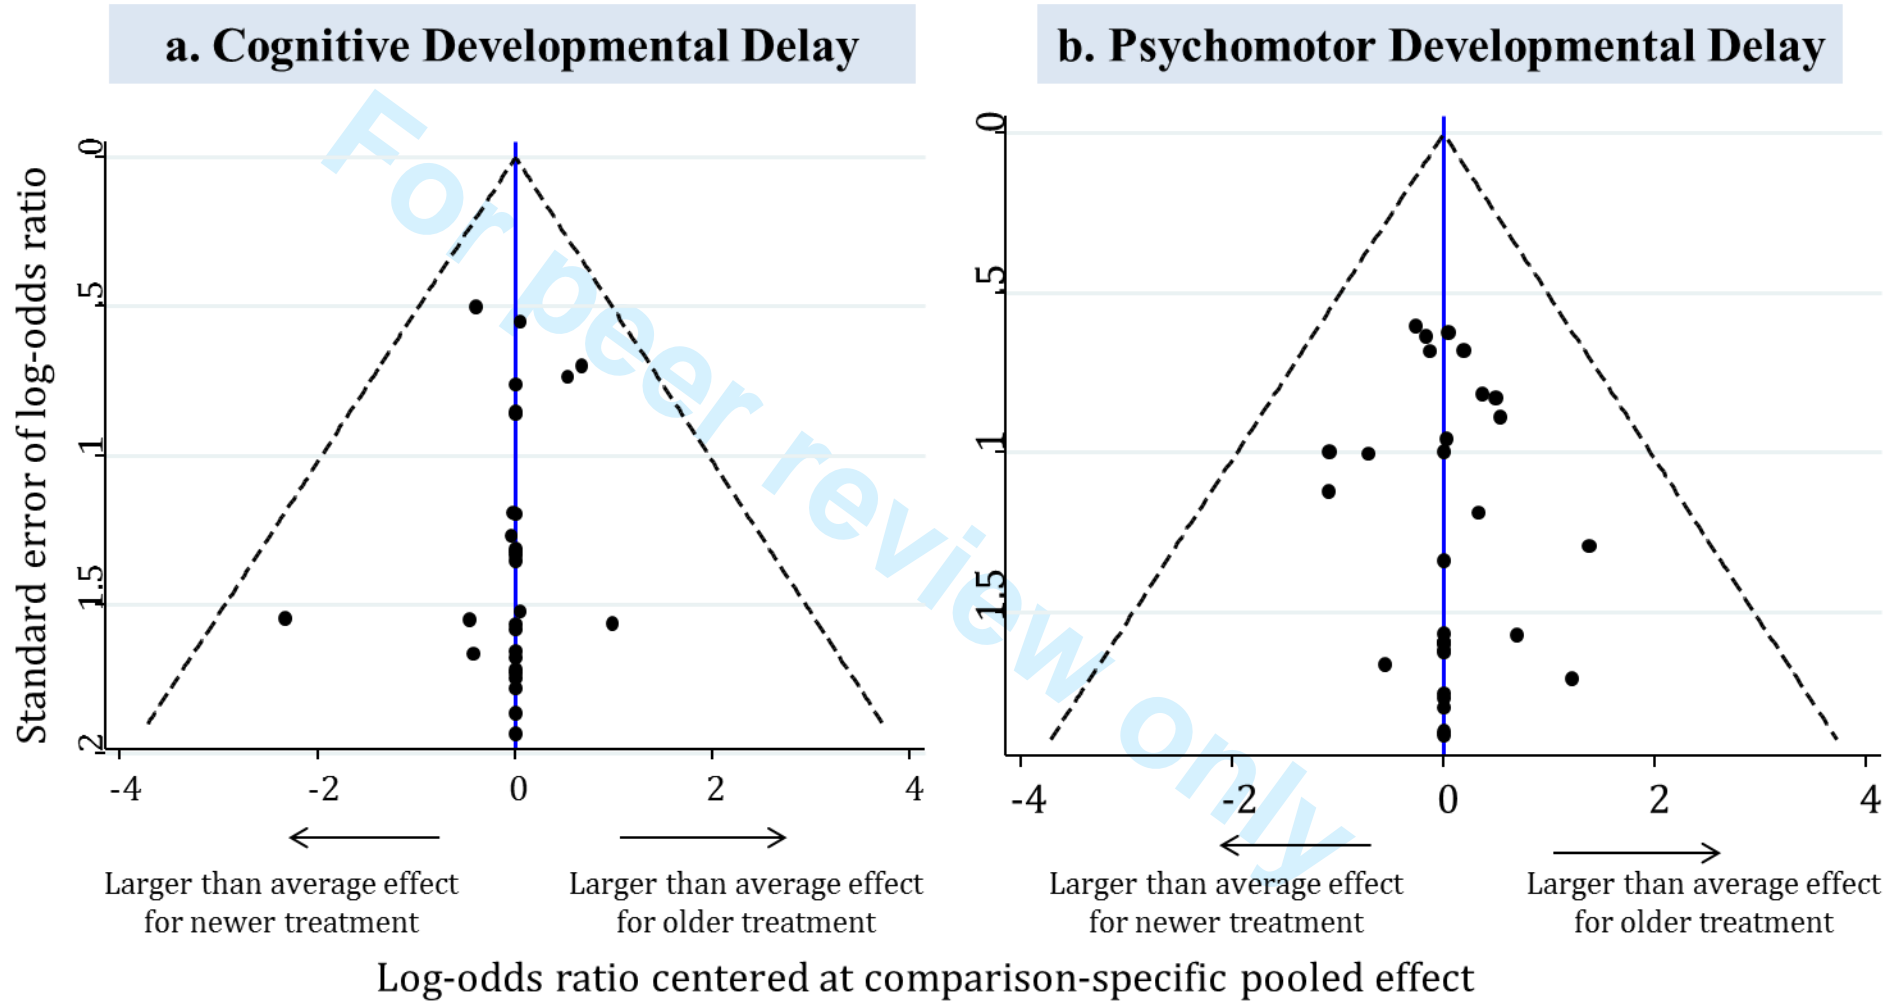

\* Funnel plots have been produced only for outcomes with  $\geq 10$  studies. For multi-arm studies we plot data points from each study-specific basic parameter (treatment comparisons with a study-specific common comparator)

**Appendix H. Statistically significant network meta-analysis results along with meta-analysis results, transitivity, and inconsistency assessments**

| Treatment Comparison                                                             | Number of Studies (Mean Baseline Risk) | Number of patients (Mean Age) | Treatment Indication | Timing        | Comparability of cohorts                         | Adequacy of follow up of cohorts | MA Odds Ratio (95% CrI)            | NMA Odds Ratio (95% CrI) (95% PrI) |
|----------------------------------------------------------------------------------|----------------------------------------|-------------------------------|----------------------|---------------|--------------------------------------------------|----------------------------------|------------------------------------|------------------------------------|
| <b>Cognitive Developmental Delay (10 studies, 748 patients, 14 treatments)</b>   |                                        |                               |                      |               |                                                  |                                  |                                    |                                    |
| Lamot vs Valpro                                                                  | 4 (NA)                                 | 140 (31.00)                   | Epilepsy             | NR            | H                                                | H                                | 0.17 (0.02-0.87)                   | 0.13 (0.01-0.57) (0.01-0.75)       |
| Valpro vs Control                                                                | 4 (0.06)                               | 267 (28.80)                   | Epilepsy             | 1st trimester | H                                                | H                                | 8.15 (3.19-22.33)                  | 7.40 (3.00-18.46) (1.81-27.63)     |
| Valpro vs Carbam                                                                 | 6 (NA)                                 | 310 (27.80)                   | Epilepsy             | NR            | H                                                | L                                | 3.32 (1.56-7.04)                   | 3.54 (1.69-7.26) (0.95-12.32)      |
| Valpro vs Pheno                                                                  | 3 (NA)                                 | 36 (27.80)                    | Epilepsy             | 1st trimester | H                                                | L                                | 4.25 (0.82-34.07)                  | 5.59 (1.21-35.07) (0.93-45.99)     |
| Valpro vs Pheny                                                                  | 3 (NA)                                 | 58 (31.00)                    | Epilepsy             | 1st trimester | H                                                | L                                | 3.12 (0.75-14.12)                  | 2.88 (1.04-8.49) (0.69-12.62)      |
| <i>Common between-study variance across treatment comparisons</i>                |                                        |                               |                      |               |                                                  |                                  | 0.13 (0.00-0.97)                   | 0.12 (0.00-1.15) (NA)              |
| Residual deviance: 44.72                                                         |                                        | Data points: 47               | DIC: 78.7            |               |                                                  |                                  |                                    |                                    |
| <i>Evaluation of consistency using the design-by-treatment interaction model</i> |                                        |                               |                      |               | Chi-square test: 14.15<br>Degrees of Freedom: 17 |                                  | P- value: 0.66<br>Heterogeneity: 0 |                                    |

| Treatment Comparison                                                             | Number of Studies<br>(Mean Baseline Risk) | Number of patients<br>(Mean Age) | Treatment Indication | Timing                                         | Comparability of cohorts | Adequacy of follow up of cohorts | MA Odds Ratio<br>(95% CrI)         | NMA Odds Ratio<br>(95% CrI)<br>(95% PrI)                                 |
|----------------------------------------------------------------------------------|-------------------------------------------|----------------------------------|----------------------|------------------------------------------------|--------------------------|----------------------------------|------------------------------------|--------------------------------------------------------------------------|
| <b>Autism Dyspraxia (5 studies, 2551 patients, 12 treatments)</b>                |                                           |                                  |                      |                                                |                          |                                  |                                    |                                                                          |
| Lamot vs Control                                                                 | 2 (0.00)                                  | 254 (27.75)                      | Epilepsy             | 1st trimester                                  | H                        | H                                | 13.77<br>(2.06-188.00)             | 8.88<br>(1.29-112.00)<br>(0.94-146.80)                                   |
| Lamot+Valpro vs Carbam                                                           | 1 (NA)                                    | 40 (NR)                          | Epilepsy             | NR                                             | L                        | L                                | 15.02<br>(2.04-171.90)             | 22.89<br>(2.58-219.00)<br>(1.90-282.20)                                  |
| Lamot+Valpro vs Clonaz                                                           | NA                                        | NR                               | NR                   | NR                                             | NR                       | NR                               | NA                                 | 20.21<br>(1.48-351.30)<br>(1.15-455.00)                                  |
| Lamot+Valpro vs Control                                                          | NA                                        | NR                               | NR                   | NR                                             | NR                       | NR                               | NA                                 | 132.70<br>(7.41-3.9 x 10 <sup>3</sup> )<br>(5.82-4.6 x 10 <sup>3</sup> ) |
| Lamot+Valpro vs Lamot                                                            | NA                                        | NR                               | NR                   | NR                                             | NR                       | NR                               | NA                                 | 14.61<br>(1.51-149.10)<br>(1.14-196.80)                                  |
| Oxcar vs Control                                                                 | NA                                        | NR                               | NR                   | NR                                             | NR                       | NR                               | NA                                 | 13.51<br>(1.28-221.40)<br>(0.86-267.40)                                  |
| Valpro vs Carbam                                                                 | 5 (NA)                                    | 1003 (27.83)                     | Epilepsy             | 1st trimester                                  | L                        | L                                | 3.20<br>(1.20-8.68)                | 3.02<br>(1.09-8.40)<br>(0.57-14.31)                                      |
| Valpro vs Control                                                                | 2 (0.00)                                  | 249 (27.75)                      | Epilepsy             | 1st trimester                                  | H                        | H                                | 9.19<br>(1.14-132.10)              | 17.29<br>(2.40-217.60)<br>(1.61-274.90)                                  |
| <i>Common between-study variance across treatment comparisons</i>                |                                           |                                  |                      |                                                |                          |                                  | 0.12<br>(0.00-1.37)                | 0.16<br>(0.00-1.95)                                                      |
| Residual deviance: 24    Data points: 24    DIC: 44                              |                                           |                                  |                      |                                                |                          |                                  |                                    | (NA)                                                                     |
| <i>Evaluation of consistency using the design-by-treatment interaction model</i> |                                           |                                  |                      | Chi-square test: 3.79<br>Degrees of Freedom: 5 |                          |                                  | P- value: 0.57<br>Heterogeneity: 0 |                                                                          |

| Treatment Comparison                                                              | Number of Studies (Mean Baseline Risk) | Number of patients (Mean Age) | Treatment Indication | Timing                                           | Comparability of cohorts | Adequacy of follow up of cohorts | MA Odds Ratio (95% CrI)            | NMA Odds Ratio (95% CrI) (95% PrI)      |
|-----------------------------------------------------------------------------------|----------------------------------------|-------------------------------|----------------------|--------------------------------------------------|--------------------------|----------------------------------|------------------------------------|-----------------------------------------|
| <b>Psychomotor Developmental Delay (11 studies, 1145 patients, 18 treatments)</b> |                                        |                               |                      |                                                  |                          |                                  |                                    |                                         |
| Carbam+Pheno+Valpro vs Control                                                    | NA                                     | NR                            | NR                   | NR                                               | NR                       | NR                               | NA                                 | 19.12<br>(1.49-337.50)<br>(1.34-370.40) |
| Carbam+Pheno+Valpro vs Pheno                                                      | NA                                     | NR                            | NR                   | NR                                               | NR                       | NR                               | NA                                 | 19.86<br>(1.38-393.60)<br>(1.26-423.30) |
| Levet vs Carbam+Pheno+Valpro                                                      | NA                                     | NR                            | NR                   | NR                                               | NR                       | NR                               | NA                                 | 0.01<br>(0.00-0.58)<br>(0.00-0.62)      |
| Valpro vs Carbam                                                                  | 7<br>(NA)                              | 331 (27.80)                   | Epilepsy             | 1st trimester                                    | H                        | H                                | 2.72<br>(1.39-5.67)                | 2.45<br>(1.27-4.88)<br>(0.95-6.77)      |
| Valpro vs Control                                                                 | 5<br>(0.07)                            | 331 (28.38)                   | Epilepsy             | 1st trimester                                    | H                        | H                                | 3.53<br>(1.60-8.64)                | 4.16<br>(2.04-8.75)<br>(1.52-12.05)     |
| Valpro vs Pheno                                                                   | 2<br>(NA)                              | 141 (NR)                      | Epilepsy             | 1st trimester                                    | H                        | H                                | 3.68<br>(1.17-12.30)               | 4.32<br>(1.72-11.20)<br>(1.34-14.51)    |
| <i>Common between-study variance across treatment comparisons</i>                 |                                        |                               |                      |                                                  |                          |                                  | 0.05<br>(0.00-0.49)                | 0.06<br>(0.00-0.63)<br>(NA)             |
| Residual deviance: 45    Data points: 51    DIC: 78                               |                                        |                               |                      |                                                  |                          |                                  |                                    |                                         |
| <i>Evaluation of consistency using the design-by-treatment interaction model</i>  |                                        |                               |                      | Chi-square test: 13.46<br>Degrees of Freedom: 21 |                          |                                  | P- value: 0.89<br>Heterogeneity: 0 |                                         |

| Treatment Comparison                                                                                                                                                                                                                                                                                      | Number of Studies<br>(Mean Baseline Risk) | Number of patients<br>(Mean Age) | Treatment Indication | Timing | Comparability of cohorts                                                         | Adequacy of follow up of cohorts | MA Odds Ratio<br>(95% CrI)                     | NMA Odds Ratio<br>(95% CrI)<br>(95% PrI) |
|-----------------------------------------------------------------------------------------------------------------------------------------------------------------------------------------------------------------------------------------------------------------------------------------------------------|-------------------------------------------|----------------------------------|----------------------|--------|----------------------------------------------------------------------------------|----------------------------------|------------------------------------------------|------------------------------------------|
| <b>Language Delay (5 studies, 509 patients, 5 treatments)</b>                                                                                                                                                                                                                                             |                                           |                                  |                      |        |                                                                                  |                                  |                                                |                                          |
| Valpro vs Control                                                                                                                                                                                                                                                                                         | 1<br>(0.03)                               | 173<br>(28.90)                   | Epilepsy             | NR     | L                                                                                | H                                | 6.96<br>(1.14-37.03)                           | 7.95<br>(1.50-49.13)<br>(0.96-74.52)     |
| <i>Common between-study variance across treatment comparisons</i>                                                                                                                                                                                                                                         |                                           |                                  |                      |        |                                                                                  |                                  | 0.15<br>(0.00-1.85)                            | 0.16<br>(0.00-2.15)<br>(NA)              |
| Residual deviance: 12                                                                                                                                                                                                                                                                                     |                                           | Data points: 14                  | DIC: 23              |        | <i>Evaluation of consistency using the design-by-treatment interaction model</i> |                                  | Chi-square test: 2.33<br>Degrees of Freedom: 3 | P- value: 0.50<br>Heterogeneity: 0       |
| <b>ADHD (4 studies, 750 patients, 6 treatments)</b>                                                                                                                                                                                                                                                       |                                           |                                  |                      |        |                                                                                  |                                  |                                                |                                          |
| <i>No statistically significant results</i>                                                                                                                                                                                                                                                               |                                           |                                  |                      |        |                                                                                  |                                  |                                                |                                          |
| Residual deviance: 12                                                                                                                                                                                                                                                                                     |                                           | Data points: 17                  | DIC: 22              |        |                                                                                  |                                  |                                                |                                          |
| <b>Abbreviations:</b> ADHD - Attention Deficit Hyperactivity Disorder; CrI - Credible Interval; DIC - Deviance Information Criterion; H- high risk of bias; L - low risk of bias; MA - Meta-analysis; NA - Not applicable; NMA - Network Meta-analysis; NR- Not Reported; PrI - Predictive Interval       |                                           |                                  |                      |        |                                                                                  |                                  |                                                |                                          |
| Carbam = Carbamazepine; Clobaz = Clobazam; Clonaz = Clonazepam; Ethos = Ethosuximide; Gabap = Gabapentin; Lamot = Lamotrigine; Levet = Levetiracetam; Oxcar = Oxcarbazepine; Pheno = Phenobarbital; Pheny = Phenytoin; Pridmid = Primidone; Topir = Topiramate; Valpro = Valproate; Vigab = Viagabatratin |                                           |                                  |                      |        |                                                                                  |                                  |                                                |                                          |

Appendix I. Rank-heat plot of cognitive developmental delay, autism/dyspraxia, psychomotor developmental delay, language delay, and attention deficit hyperactivity disorder outcomes\*

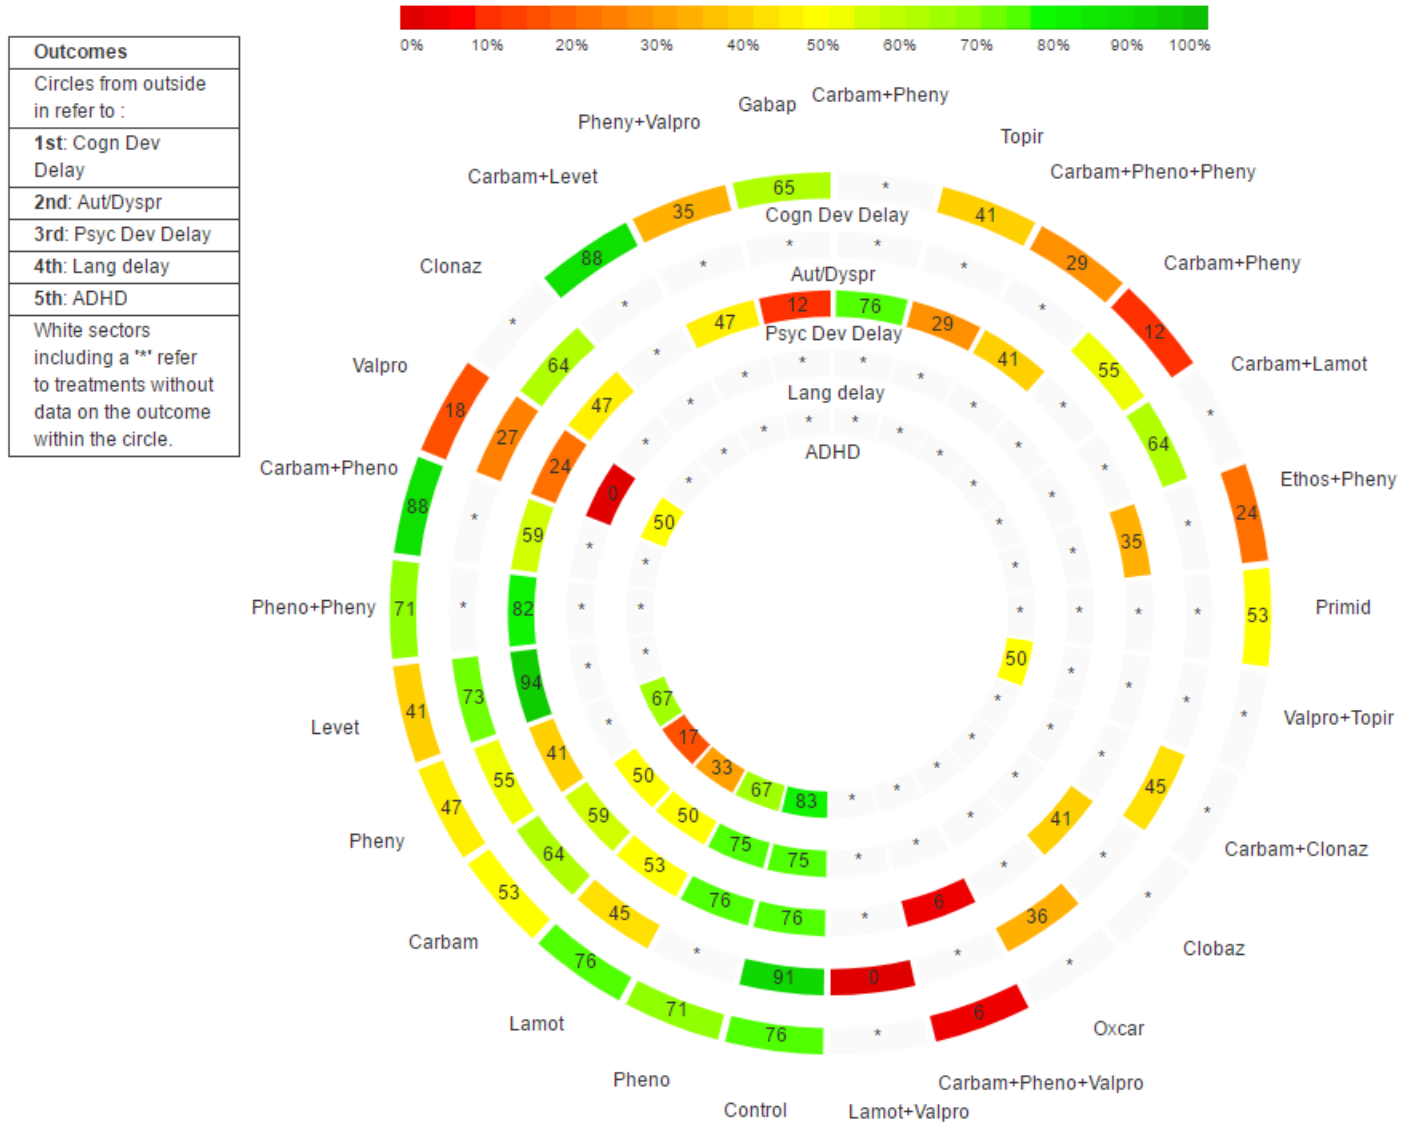

1  
2  
3  
4  
5  
6  
7  
8  
9  
10  
11  
12  
13  
14  
15  
16  
17  
18  
19  
20  
21  
22  
23  
24  
25  
26  
27  
28  
29  
30  
31  
32  
33  
34  
35  
36  
37  
38  
39  
40  
41  
42  
43  
44  
45  
46  
47  
48  
49



1  
2  
3  
4 **Abbreviations:** carbam - carbamazepine, clobaz - clobazam, clonaz - clonazepam, ethos - ethosuximide, gabap - gabapentin, lamot - lamotrigine, levet -  
5 levetiracetam, oscar - oxcarbazepine, pheno - phenobarbital, pheny - phenytoin, primid - primidone, topir - topiramate, valpro - valproate, vigab - vigabatrin  
6

7 \*Rank-heat plot of cognitive developmental delay, autism/dyspraxia, psychomotor developmental delay, language delay, and attention deficit hyperactivity  
8 disorder outcomes (5 circles) and 25 treatments (25 radii). Each sector is coloured according to the surface under the cumulative ranking curve value of the  
9 corresponding treatment and outcome using the transformation of three colours red (0%), yellow (50%), and green (100%).  
10  
11  
12  
13  
14  
15  
16  
17  
18  
19  
20  
21  
22  
23  
24  
25  
26  
27  
28  
29  
30  
31  
32  
33  
34  
35  
36  
37  
38  
39  
40  
41  
42  
43  
44  
45  
46  
47  
48  
49

For peer review only

1  
2  
3  
4  
5  
6  
7  
8  
9  
10  
11  
12  
13  
14  
15  
16  
17  
18  
19  
20  
21  
22  
23  
24  
25  
26  
27  
28  
29  
30  
31  
32  
33  
34  
35  
36  
37  
38  
39  
40  
41  
42  
43  
44  
45  
46  
47  
48  
49

**Appendix J. Number of studies and treatments per outcome**

| Total studies                                                                                      | Range of study arms | # of treatments | # of patients | # of direct treatment comparisons | # of NMA treatment comparisons | Statistically significant NMA treatment effects | # of studies with zero events in all arms | # of studies with ineligible outcome definition* |
|----------------------------------------------------------------------------------------------------|---------------------|-----------------|---------------|-----------------------------------|--------------------------------|-------------------------------------------------|-------------------------------------------|--------------------------------------------------|
| <b>Cognitive Developmental Delay</b>                                                               |                     |                 |               |                                   |                                |                                                 |                                           |                                                  |
| 11                                                                                                 | (2,8)               | 18              | 933           | 62                                | 153                            | 5                                               | 1                                         | 5                                                |
| <b>Autism/Dyspraxia</b>                                                                            |                     |                 |               |                                   |                                |                                                 |                                           |                                                  |
| 5                                                                                                  | (4,6)               | 12              | 2551          | 34                                | 66                             | 8                                               | 0                                         | 4                                                |
| <b>Neonatal Seizure</b>                                                                            |                     |                 |               |                                   |                                |                                                 |                                           |                                                  |
| 1                                                                                                  | (2,2)               | 2               | 69            | 1                                 | 0                              | 0                                               | 1                                         | 1                                                |
| <b>Psychomotor Developmental Delay</b>                                                             |                     |                 |               |                                   |                                |                                                 |                                           |                                                  |
| 11                                                                                                 | (2,8)               | 18              | 1145          | 74                                | 153                            | 6                                               | 0                                         | 5                                                |
| <b>Language Delay</b>                                                                              |                     |                 |               |                                   |                                |                                                 |                                           |                                                  |
| 5                                                                                                  | (2,4)               | 5               | 509           | 7                                 | 10                             | 1                                               | 0                                         | 3                                                |
| <b>ADHD</b>                                                                                        |                     |                 |               |                                   |                                |                                                 |                                           |                                                  |
| 5                                                                                                  | (4,6)               | 7               | 816           | 20                                | 21                             | 0                                               | 0                                         | 0                                                |
| <b>Social Impairment</b>                                                                           |                     |                 |               |                                   |                                |                                                 |                                           |                                                  |
| 1                                                                                                  | (4,4)               | 4               | 422           | 1                                 | 0                              | 0                                               | 0                                         | 0                                                |
| <b>Abbreviations:</b> ADHD - Attention Deficit Hyperactivity Disorder; NMA - Network Meta-analysis |                     |                 |               |                                   |                                |                                                 |                                           |                                                  |

## Appendix K. Sensitivity and network meta-regression analyses - Anti-epileptic drugs compared with Control

| Treatment Comparison                                                                                                              | NMA Odds Ratio | 95% CrI                                          | 95% PrI                              |
|-----------------------------------------------------------------------------------------------------------------------------------|----------------|--------------------------------------------------|--------------------------------------|
| <b>Cognitive Developmental Delay – Sensitivity Analysis - Epilepsy only (10 studies, 910 patients, 17 treatments)</b>             |                |                                                  |                                      |
| Carbamazepine vs Control                                                                                                          | 2.08           | (0.79 - 5.82)                                    | (0.47 - 9.34)                        |
| Carbamazepine+Phenobarbital vs Control                                                                                            | 0.62           | (0.00 - 15.31)                                   | (0.00 - 19.29)                       |
| Carbamazepine+Phenobarbital+Phenytoin vs Control                                                                                  | 4.75           | (0.01 - 164.80)                                  | (0.01 - 192.50)                      |
| Carbamazepine+Phenobarbital+Valproate vs Control                                                                                  | 15.00          | (1.00 - 367.10)                                  | (0.82 - 426.90)                      |
| Carbamazepine+Phenytoin vs Control                                                                                                | 9.84           | (0.60 - 136.30)                                  | (0.49 - 164.50)                      |
| Ethosuximide+Phenytoin vs Control                                                                                                 | 6.53           | (0.02 - 216.00)                                  | (0.02 - 251.30)                      |
| Gabapentin vs Control                                                                                                             | 1.43           | (0.05 - 14.28)                                   | (0.04 - 18.20)                       |
| Lamotrigine vs Control                                                                                                            | 0.79           | (0.05 - 5.12)                                    | (0.05 - 6.66)                        |
| Levetiracetam vs Control                                                                                                          | 3.46           | (0.65 - 17.14)                                   | (0.47 - 23.57)                       |
| Phenobarbital vs Control                                                                                                          | 0.55           | (0.01 - 5.38)                                    | (0.01 - 6.85)                        |
| Phenobarbital+Phenytoin vs Control                                                                                                | 1.28           | (0.00 - 36.18)                                   | (0.00 - 44.03)                       |
| Phenytoin vs Control                                                                                                              | 2.47           | (0.65 - 8.25)                                    | (0.41 - 12.47)                       |
| Phenytoin+Valproate vs Control                                                                                                    | 3.68           | (0.01 - 121.00)                                  | (0.01 - 135.00)                      |
| Primidone vs Control                                                                                                              | 1.97           | (0.25 - 12.16)                                   | (0.19 - 16.25)                       |
| Topiramate vs Control                                                                                                             | 3.06           | (0.42 - 17.51)                                   | (0.32 - 23.57)                       |
| Valproate vs Control                                                                                                              | 7.48           | (2.99 - 19.04)                                   | (1.67 - 31.21)                       |
| <i>Common within-network between-study variance</i>                                                                               | 0.16           | (0.00 - 1.36)                                    |                                      |
| <i>Evaluation of inconsistency using the design-by-treatment interaction model</i>                                                |                | Chi-square test: 12.98<br>Degrees of Freedom: 14 | P-value: 0.53<br>Heterogeneity: 0.00 |
| <b>Cognitive Developmental Delay - Sensitivity Analysis - First generation AEDs only (6 studies, 480 patients, 13 treatments)</b> |                |                                                  |                                      |
| Carbamazepine vs Control                                                                                                          | 1.68           | (0.37 - 7.82)                                    | (0.19 - 14.98)                       |
| Carbamazepine+Phenytoin vs Control                                                                                                | 8.98           | (0.36 - 169.90)                                  | (0.26 - 243.60)                      |
| Carbamazepine+Phenobarbital vs Control                                                                                            | 0.46           | (0.00 - 21.02)                                   | (0.00 - 28.01)                       |
| Carbamazepine+Phenobarbital+Phenytoin vs Control                                                                                  | 4.12           | (0.01 - 180.10)                                  | (0.00 - 236.30)                      |
| Carbamazepine+Phenobarbital+Valproate vs Control                                                                                  | 12.84          | (0.50 - 435.70)                                  | (0.35 - 604.30)                      |
| Ethosuximide+Phenytoin vs Control                                                                                                 | 5.65           | (0.01 - 219.00)                                  | (0.01 - 291.50)                      |

| Treatment Comparison                                                                                                                             | NMA Odds Ratio | 95% CrI                                        | 95% PrI                              |
|--------------------------------------------------------------------------------------------------------------------------------------------------|----------------|------------------------------------------------|--------------------------------------|
| Phenobarbital vs Control                                                                                                                         | 0.64           | (0.00 - 26.02)                                 | (0.00 - 35.36)                       |
| Phenobarbital+Phenytoin vs Control                                                                                                               | 1.06           | (0.00 - 37.64)                                 | (0.00 - 50.85)                       |
| Phenytoin vs Control                                                                                                                             | 2.08           | (0.26 - 12.50)                                 | (0.13 - 22.02)                       |
| Phenytoin+Valproate vs Control                                                                                                                   | 3.14           | (0.00 - 135.80)                                | (0.00 - 178.90)                      |
| Primidone vs Control                                                                                                                             | 3.30           | (0.18 - 43.76)                                 | (0.12 - 68.72)                       |
| Valproate vs Control                                                                                                                             | 13.22          | (3.20 - 64.06)                                 | (1.50 - 128.40)                      |
| <i>Common within-network between-study variance</i>                                                                                              | 0.27           | (0.00 - 2.97)                                  |                                      |
| <i>Evaluation of inconsistency using the design-by-treatment interaction model</i>                                                               |                | Chi-square test: 3.31<br>Degrees of Freedom: 3 | P-value: 0.35<br>Heterogeneity: 0.00 |
| <b>Cognitive Developmental Delay - Sensitivity Analysis - Maternal Alcohol or Tobacco use (3 studies, 504 patients, 7 treatments)</b>            |                |                                                |                                      |
| Carbamazepine vs Control                                                                                                                         | 1.97           | (0.40 - 10.01)                                 | (0.19 - 21.27)                       |
| Gabapentin vs Control                                                                                                                            | 1.47           | (0.04 - 19.01)                                 | (0.02 - 27.11)                       |
| Lamotrigine vs Control                                                                                                                           | 0.41           | (0.00 - 10.09)                                 | (0.00 - 13.61)                       |
| Levetiracetam vs Control                                                                                                                         | 3.55           | (0.43 - 24.13)                                 | (0.23 - 42.39)                       |
| Topiramate vs Control                                                                                                                            | 3.17           | (0.30 - 24.07)                                 | (0.18 - 44.87)                       |
| Valproate vs Control                                                                                                                             | 7.79           | (1.84 - 29.60)                                 | (0.84 - 62.77)                       |
| <i>Common within-network between-study variance</i>                                                                                              | 0.27           | (0.00 - 3.29)                                  |                                      |
| <i>Evaluation of inconsistency using the design-by-treatment interaction model</i>                                                               |                | Chi-square test: 2.69<br>Degrees of Freedom: 2 | P-value: 0.26<br>Heterogeneity: NA   |
| <b>Cognitive Developmental Delay - Sensitivity Analysis - Low Risk of Bias: "Adequacy of follow-up" (4 studies, 283 patients, 12 treatments)</b> |                |                                                |                                      |
| Carbamazepine vs Control                                                                                                                         | 2.68           | (0.05 - 2.9 x 10 <sup>3</sup> )                | (0.03 - 4.3 x 10 <sup>3</sup> )      |
| Carbamazepine+Phenobarbital vs Control                                                                                                           | 0.67           | (0.00 - 2.2 x 10 <sup>3</sup> )                | (0.00 - 2.9 x 10 <sup>3</sup> )      |
| Carbamazepine+Phenobarbital+Phenytoin vs Control                                                                                                 | 5.23           | (0.01 - 7.2 x 10 <sup>3</sup> )                | (0.00 - 1.1 x 10 <sup>4</sup> )      |
| Carbamazepine+Phenobarbital+Valproate vs Control                                                                                                 | 22.18          | (0.10 - 4.8 x 10 <sup>4</sup> )                | (0.06 - 7.7 x 10 <sup>4</sup> )      |
| Carbamazepine+Phenytoin vs Control                                                                                                               | 11.45          | (0.13 - 1.2 x 10 <sup>4</sup> )                | (0.07 - 1.8 x 10 <sup>4</sup> )      |
| Ethosuximide+Phenytoin vs Control                                                                                                                | 6.45           | (0.01 - 8.3 x 10 <sup>3</sup> )                | (0.00 - 1.4 x 10 <sup>4</sup> )      |
| Lamotrigine vs Control                                                                                                                           | 0.52           | (0.00 - 1.2 x 10 <sup>3</sup> )                | (0.00 - 1.9 x 10 <sup>3</sup> )      |
| Phenobarbital+Phenytoin vs Control                                                                                                               | 1.33           | (0.00 - 1.8 x 10 <sup>3</sup> )                | (0.00 - 2.7 x 10 <sup>3</sup> )      |
| Phenytoin vs Control                                                                                                                             | 1.67           | (0.03 - 1.8 x 10 <sup>3</sup> )                | (0.01 - 2.5 x 10 <sup>3</sup> )      |

| Treatment Comparison                                                                                                                                  | NMA Odds Ratio | 95% CrI                                        | 95% PrI                              |
|-------------------------------------------------------------------------------------------------------------------------------------------------------|----------------|------------------------------------------------|--------------------------------------|
| Phenytoin+Valproate vs Control                                                                                                                        | 3.94           | (0.00 - 6.7 x 10 <sup>3</sup> )                | (0.00 - 8.8 x10 <sup>3</sup> )       |
| Valproate vs Control                                                                                                                                  | 5.9            | (0.06 - 9.7 x 10 <sup>3</sup> )                | (0.03 - 1.5 x 10 <sup>4</sup> )      |
| <i>Common within-network between-study variance</i>                                                                                                   | 1.01           | (0.01 - 5.85)                                  |                                      |
| <i>Evaluation of inconsistency using the design-by-treatment interaction model</i>                                                                    |                | Chi-square test: 5.07<br>Degrees of Freedom: 2 | P-value: 0.08<br>Heterogeneity: 0.00 |
| <b>Cognitive Developmental Delay - Sensitivity Analysis - Low Risk of Bias: "Comparability of cohorts"</b><br>(3 studies, 366 patients, 7 treatments) |                |                                                |                                      |
| Carbamazepine vs Control                                                                                                                              | 1.46           | (0.11 - 19.59)                                 | (0.06 - 38.10)                       |
| Gabapentin vs Control                                                                                                                                 | 1.19           | (0.03 - 22.80)                                 | (0.02 - 39.35)                       |
| Lamotrigine vs Control                                                                                                                                | 0.27           | (0.00 - 11.80)                                 | (0.00 - 19.37)                       |
| Levetiracetam vs Control                                                                                                                              | 2.90           | (0.30 - 32.81)                                 | (0.15 - 62.97)                       |
| Topiramate vs Control                                                                                                                                 | 2.55           | (0.22 - 29.21)                                 | (0.11 - 64.23)                       |
| Valproate vs Control                                                                                                                                  | 5.79           | (1.05 - 47.35)                                 | (0.47 - 102.90)                      |
| <i>Common within-network between-study variance</i>                                                                                                   | 0.38           | (0.00 - 4.14)                                  |                                      |
| <i>Evaluation of inconsistency using the design-by-treatment interaction model</i>                                                                    |                | Chi-square test: 1.47<br>Degrees of Freedom: 2 | P-value: 0.48<br>Heterogeneity: NA   |
| <b>Cognitive Developmental Delay – Network Meta-regression Analysis</b><br>(11 studies, 933 patients, 18 treatments)                                  |                |                                                |                                      |
| Carbamazepine vs Control                                                                                                                              | 1.99           | (0.64 - 6.18)                                  | (0.40 - 9.77)                        |
| Carbamazepine+Levetiracetam vs Control                                                                                                                | 0.54           | (0.00 - 16.36)                                 | (0.00 - 19.87)                       |
| Carbamazepine+Phenobarbital vs Control                                                                                                                | 0.50           | (0.00 - 16.10)                                 | (0.00 - 19.36)                       |
| Carbamazepine+Phenobarbital+Phenytoin vs Control                                                                                                      | 4.36           | (0.01 - 171.20)                                | (0.01 - 194.60)                      |
| Carbamazepine+Phenobarbital+Valproate vs Control                                                                                                      | 14.58          | (0.90 - 413.20)                                | (0.74 - 488.90)                      |
| Carbamazepine+Phenytoin vs Control                                                                                                                    | 9.44           | (0.50 - 130.50)                                | (0.39 - 162.40)                      |
| Ethosuximide+Phenytoin vs Control                                                                                                                     | 5.77           | (0.01 - 234.70)                                | (0.01 - 268.10)                      |
| Gabapentin vs Control                                                                                                                                 | 1.37           | (0.04 - 15.51)                                 | (0.03 - 19.10)                       |
| Lamotrigine vs Control                                                                                                                                | 0.87           | (0.07 - 5.14)                                  | (0.06 - 6.76)                        |
| Levetiracetam vs Control                                                                                                                              | 3.43           | (0.57 - 18.78)                                 | (0.42 - 24.85)                       |
| Phenobarbital vs Control                                                                                                                              | 1.16           | (0.13 - 8.59)                                  | (0.10 - 11.43)                       |
| Phenobarbital+Phenytoin vs Control                                                                                                                    | 1.34           | (0.00 - 39.21)                                 | (0.00 - 49.39)                       |

| Treatment Comparison                                                                                                         | NMA Odds Ratio | 95% CrI                                          | 95% PrI                              |
|------------------------------------------------------------------------------------------------------------------------------|----------------|--------------------------------------------------|--------------------------------------|
| Phenytoin vs Control                                                                                                         | 2.43           | (0.55 - 9.14)                                    | (0.36 - 13.45)                       |
| Phenytoin+Valproate vs Control                                                                                               | 3.58           | (0.01 - 134.20)                                  | (0.01 - 161.70)                      |
| Primidone vs Control                                                                                                         | 2.03           | (0.21 - 16.49)                                   | (0.16 - 21.39)                       |
| Topiramate vs Control                                                                                                        | 2.93           | (0.41 - 16.34)                                   | (0.31 - 22.91)                       |
| Valproate vs Control                                                                                                         | 7.03           | (2.26 - 20.02)                                   | (1.41 - 30.92)                       |
| <i>Common within-network between-study variance</i>                                                                          | 0.16           | (0.00 - 1.27)                                    |                                      |
| <i>Regression Coefficient</i>                                                                                                | 1.01           | (0.76 - 1.56)                                    |                                      |
| <i>Evaluation of inconsistency using the design-by-treatment interaction model</i>                                           |                | Chi-square test: 14.15<br>Degrees of Freedom: 17 | P-value: 0.66<br>Heterogeneity: 0.00 |
| <b>Autism/Dyspraxia - Sensitivity Analysis - Large cohort (&gt;300 patients) - (1 study, 2,551 patients, 5 treatments)**</b> |                |                                                  |                                      |
| Clonazepam vs Carbamazepine                                                                                                  | 1.08           | (0.24 - 4.85)                                    | -                                    |
| Lamotrigine vs Carbamazepine                                                                                                 | 1.20           | (0.36 - 4.00)                                    | -                                    |
| Oxcarbazepine vs Carbamazepine                                                                                               | 2.13           | (0.62 - 7.35)                                    | -                                    |
| Valproate vs Carbamazepine                                                                                                   | 3.05           | (0.97 - 9.52)                                    | -                                    |
| <i>Common within-network between-study variance</i>                                                                          | NA             | NA                                               |                                      |
| <i>Evaluation of inconsistency using the design-by-treatment interaction model</i>                                           |                | NA                                               | NA                                   |
| <b>Autism/Dyspraxia - Sensitivity Analysis - Epilepsy only (4 studies, 540 patients, 10 treatments)</b>                      |                |                                                  |                                      |
| Carbamazepine vs Control                                                                                                     | 5.20           | (0.54 - 90.53)                                   | (0.33 - 133.00)                      |
| Carbamazepine+Clonazepam vs Control                                                                                          | 7.90           | (0.01 - 653.30)                                  | (0.01 - 881.00)                      |
| Carbamazepine+Lamotrigine vs Control                                                                                         | 4.25           | (0.01 - 333.60)                                  | (0.01 - 446.90)                      |
| Carbamazepine+Phenytoin vs Control                                                                                           | 9.03           | (0.01 - 666.30)                                  | (0.01 - 893.00)                      |
| Lamotrigine vs Control                                                                                                       | 10.24          | (1.25 - 171.40)                                  | (0.67 - 248.50)                      |
| Lamotrigine+Valproate vs Control                                                                                             | 120.20         | (5.25 - 4.5 x 10 <sup>3</sup> )                  | (3.51 - 6.0 x 10 <sup>3</sup> )      |
| Levetiracetam vs Control                                                                                                     | 3.52           | (0.00 - 272.20)                                  | (0.00 - 364.30)                      |
| Phenytoin vs Control                                                                                                         | 8.10           | (0.01 - 577.50)                                  | (0.01 - 754.60)                      |
| Valproate vs Control                                                                                                         | 14.41          | (1.66 - 252.10)                                  | (0.88 - 378.00)                      |
| <i>Common within-network between-study variance</i>                                                                          | 0.31           | (0.00 - 3.04)                                    |                                      |
| <i>Evaluation of inconsistency using the design-by-treatment interaction model</i>                                           |                | Chi-square test: 2.9<br>Degrees of Freedom: 3    | P-value: 0.41<br>Heterogeneity: 0.00 |

| Treatment Comparison                                                                                                                     | NMA Odds Ratio                                          | 95% CrI                                        | 95% PrI                              |
|------------------------------------------------------------------------------------------------------------------------------------------|---------------------------------------------------------|------------------------------------------------|--------------------------------------|
| <b>Autism/Dyspraxia - Sensitivity Analysis - Maternal Tobacco Use (4 studies, 540 patients, 10 treatments)</b>                           |                                                         |                                                |                                      |
| Carbamazepine vs Control                                                                                                                 | 2.51                                                    | (0.05 - 154.30)                                | (0.04 - 254.50)                      |
| Lamotrigine vs Control                                                                                                                   | 24.84                                                   | (2.14 - 1.2 x 10 <sup>3</sup> )                | (1.23 - 2.2 x 10 <sup>3</sup> )      |
| Valproate vs Control                                                                                                                     | 33.40                                                   | (2.60 - 1.7 x 10 <sup>3</sup> )                | (1.45 - 2.9 x 10 <sup>3</sup> )      |
| <i>Common within-network between-study variance</i>                                                                                      | 0.39                                                    | (0.00 - 4.47)                                  |                                      |
| <i>Evaluation of inconsistency using the design-by-treatment interaction model</i>                                                       | NA - all closed loops are formed from a multi-arm study |                                                |                                      |
| <b>Autism/Dyspraxia - Sensitivity Analysis - Maternal Alcohol Use (1 study, 156 patients, 4 treatments)</b>                              |                                                         |                                                |                                      |
|                                                                                                                                          | Excluded due to                                         |                                                |                                      |
| Carbamazepine vs Control                                                                                                                 | zero events                                             | -                                              | -                                    |
| Lamotrigine vs Control                                                                                                                   | 4.65                                                    | (0.21 - 100.00)                                | -                                    |
| Valproate vs Control                                                                                                                     | 7.75                                                    | (0.42 - 142.86)                                | -                                    |
| <i>Common within-network between-study variance</i>                                                                                      | 1.91                                                    | (0.36 - 10.13)                                 |                                      |
| <i>Evaluation of inconsistency using the design-by-treatment interaction model</i>                                                       |                                                         | NA                                             | NA                                   |
| <b>Autism/Dyspraxia - Sensitivity Analysis - Low Risk of Bias: "Adequacy of Follow-up" (3 studies, 2,244 patients, 10 treatments)</b>    |                                                         |                                                |                                      |
| Carbamazepine vs Control                                                                                                                 | 3.97                                                    | (0.17 - 2.4 x 10 <sup>3</sup> )                | (0.11 - 3.0 x 10 <sup>3</sup> )      |
| Carbamazepine+Clonazepam vs Control                                                                                                      | 7.48                                                    | (0.01 - 7.8 x 10 <sup>3</sup> )                | (0.01 - 9.0 x 10 <sup>3</sup> )      |
| Carbamazepine+Lamotrigine vs Control                                                                                                     | 4.47                                                    | (0.00 - 5.0 x 10 <sup>3</sup> )                | (0.00 - 5.7 x 10 <sup>3</sup> )      |
| Carbamazepine+Phenytoin vs Control                                                                                                       | 7.23                                                    | (0.01 - 6.6 x 10 <sup>3</sup> )                | (0.01 - 8.2 x 10 <sup>3</sup> )      |
| Clonazepam vs Control                                                                                                                    | 4.88                                                    | (0.12 - 3.2 x 10 <sup>3</sup> )                | (0.09 - 3.8 x 10 <sup>3</sup> )      |
| Lamotrigine vs Control                                                                                                                   | 6.55                                                    | (0.30 - 4.4 x 10 <sup>3</sup> )                | (0.21 - 4.7 x 10 <sup>3</sup> )      |
| Lamotrigine+Valproate vs Control                                                                                                         | 113.50                                                  | (2.33 - 7.8 x 10 <sup>4</sup> )                | (1.62 - 8.9 x 10 <sup>4</sup> )      |
| Oxcarbazepine vs Control                                                                                                                 | 10.23                                                   | (0.36 - 6.8 x 10 <sup>3</sup> )                | (0.26 - 7.5 x 10 <sup>3</sup> )      |
| Valproate vs Control                                                                                                                     | 13.97                                                   | (0.68 - 8.4 x 10 <sup>3</sup> )                | (0.47 - 1.0 x 10 <sup>4</sup> )      |
| <i>Common within-network between-study variance</i>                                                                                      | 0.23                                                    | (0.00 - 2.88)                                  |                                      |
| <i>Evaluation of inconsistency using the design-by-treatment interaction model</i>                                                       |                                                         | Chi-square test: 2.17<br>Degrees of Freedom: 3 | P-value: 0.54<br>Heterogeneity: 0.00 |
| <b>Autism/Dyspraxia - Sensitivity Analysis - Low Risk of Bias: "Comparability of Cohorts" (4 studies, 2,395 patients, 12 treatments)</b> |                                                         |                                                |                                      |
| Carbamazepine vs Control                                                                                                                 | 9.55                                                    | (0.90 - 246.20)                                | (0.61 - 329.40)                      |

| Treatment Comparison                                                                                | NMA Odds Ratio | 95% CrI                                        | 95% PrI                              |
|-----------------------------------------------------------------------------------------------------|----------------|------------------------------------------------|--------------------------------------|
| Carbamazepine+Clonazepam vs Control                                                                 | 13.58          | (0.01 - 1.3 x 10 <sup>3</sup> )                | (0.01 - 1.6 x 10 <sup>3</sup> )      |
| Carbamazepine+Lamotrigine vs Control                                                                | 7.11           | (0.01 - 614.20)                                | (0.01 - 717.60)                      |
| Carbamazepine+Phenytoin vs Control                                                                  | 10.97          | (0.01 - 1.1 x 10 <sup>3</sup> )                | (0.01 - 1.4 x 10 <sup>3</sup> )      |
| Clonazepam vs Control                                                                               | 8.33           | (0.45 - 263.10)                                | (0.33 - 353.70)                      |
| Lamotrigine vs Control                                                                              | 10.98          | (1.07 - 283.50)                                | (0.71 - 358.20)                      |
| Lamotrigine+Valproate vs Control                                                                    | 194.10         | (8.06 - 8.4 x 10 <sup>3</sup> )                | (6.28 - 1.0 x 10 <sup>4</sup> )      |
| Levetiracetam vs Control                                                                            | 4.25           | (0.00 - 390.90)                                | (0.00 - 485.30)                      |
| Oxcarbazepine vs Control                                                                            | 17.60          | (1.22 - 552.20)                                | (0.86 - 727.40)                      |
| Phenytoin vs Control                                                                                | 9.76           | (0.01 - 861.60)                                | (0.01 - 1.0 x 10 <sup>3</sup> )      |
| Valproate vs Control                                                                                | 21.06          | (1.86 - 525.40)                                | (1.25 - 681.90)                      |
| <i>Common within-network between-study variance</i>                                                 | 0.19           | (0.00 - 2.43)                                  |                                      |
| <i>Evaluation of inconsistency using the design-by-treatment interaction model</i>                  |                | Chi-square test: 3.36<br>Degrees of Freedom: 5 | P-value: 0.64<br>Heterogeneity: 0.00 |
| <b>Autism/Dyspraxia - Sensitivity Analysis - Maternal IQ (1 study, 77 patients, 6 treatments)**</b> |                |                                                |                                      |
| Carbamazepine+Clonazepam vs Carbamazepine                                                           | 1.86           | (0.07 - 47.62)                                 | -                                    |
| Carbamazepine+Lamotrigine vs Carbamazepine                                                          | 1.18           | (0.05 - 27.78)                                 | -                                    |
| Carbamazepine+Phenytoin vs Carbamazepine                                                            | 1.86           | (0.07 - 47.62)                                 | -                                    |
| Lamotrigine+Valproate vs Carbamazepine                                                              | 15.87          | (1.87 - 142.86)                                | -                                    |
| Valproate vs Carbamazepine                                                                          | 1.33           | (0.18 - 10.20)                                 | -                                    |
| <i>Common within-network between-study variance</i>                                                 | NA             | NA                                             |                                      |
| <i>Evaluation of inconsistency using the design-by-treatment interaction model</i>                  |                | NA                                             | NA                                   |

Abbreviations: NMA – Network Meta-analysis; OR – odds ratio; CrI – Credible Interval; PrI – Predictive Interval

\*\* Network did not include a control arm, comparison with Carbamazepine is reported instead



# BMJ Open

## Comparative safety of anti-epileptic drugs for neurological development in children exposed during pregnancy and breastfeeding: a systematic review and network meta-analysis



|                                    |                                                                                                                                                                                                                                                                                                                                                                                                                                                                                                                                                                                                                                                                                                                                                                                                                                                                                                                                                                                                                                                                                                                                                                                                                                                                                                                                                                                                                                                                                                                                                                                                                                                                                                                                    |
|------------------------------------|------------------------------------------------------------------------------------------------------------------------------------------------------------------------------------------------------------------------------------------------------------------------------------------------------------------------------------------------------------------------------------------------------------------------------------------------------------------------------------------------------------------------------------------------------------------------------------------------------------------------------------------------------------------------------------------------------------------------------------------------------------------------------------------------------------------------------------------------------------------------------------------------------------------------------------------------------------------------------------------------------------------------------------------------------------------------------------------------------------------------------------------------------------------------------------------------------------------------------------------------------------------------------------------------------------------------------------------------------------------------------------------------------------------------------------------------------------------------------------------------------------------------------------------------------------------------------------------------------------------------------------------------------------------------------------------------------------------------------------|
| Journal:                           | <i>BMJ Open</i>                                                                                                                                                                                                                                                                                                                                                                                                                                                                                                                                                                                                                                                                                                                                                                                                                                                                                                                                                                                                                                                                                                                                                                                                                                                                                                                                                                                                                                                                                                                                                                                                                                                                                                                    |
| Manuscript ID                      | bmjopen-2017-017248.R2                                                                                                                                                                                                                                                                                                                                                                                                                                                                                                                                                                                                                                                                                                                                                                                                                                                                                                                                                                                                                                                                                                                                                                                                                                                                                                                                                                                                                                                                                                                                                                                                                                                                                                             |
| Article Type:                      | Research                                                                                                                                                                                                                                                                                                                                                                                                                                                                                                                                                                                                                                                                                                                                                                                                                                                                                                                                                                                                                                                                                                                                                                                                                                                                                                                                                                                                                                                                                                                                                                                                                                                                                                                           |
| Date Submitted by the Author:      | 01-Jun-2017                                                                                                                                                                                                                                                                                                                                                                                                                                                                                                                                                                                                                                                                                                                                                                                                                                                                                                                                                                                                                                                                                                                                                                                                                                                                                                                                                                                                                                                                                                                                                                                                                                                                                                                        |
| Complete List of Authors:          | Veroniki, Areti Angeliki; Li Ka Shing Knowledge Institute, St. Michael's Hospital<br>Rios, Patricia; Li Ka Shing Knowledge Institute, St. Michael's Hospital<br>Cogo, Elise; Li Ka Shing Knowledge Institute, St. Michael's Hospital<br>Straus, Sharon; Li Ka Shing Knowledge Institute, St. Michael's Hospital;<br>University of Toronto, Department of Medicine<br>Finkelstein, Yaron; The Hospital for Sick Children; University of Toronto,<br>Department of Paediatrics<br>Kealey, M.; Li Ka Shing Knowledge Institute, St. Michael's Hospital<br>Reynen, Emily; Li Ka Shing Knowledge Institute, St. Michael's Hospital<br>Soobiah, Charlene; Li Ka Shing Knowledge Institute, St. Michael's Hospital;<br>University of Toronto, Institute for Health Policy Management & Evaluation<br>Thavorn, Kednapa; University of Ottawa, School of Epidemiology, Public<br>Health and Preventive Medicine, Faculty of Medicine; The Ottawa Hospital<br>Research Institute, Clinical Epidemiology Program<br>Hutton, Brian; University of Ottawa, School of Epidemiology, Public Health<br>and Preventive Medicine, Faculty of Medicine; Ottawa Hospital Research<br>Institute, Center for Practice Changing Research<br>Hemmelgarn, BR; University of Calgary, Departments of Medicine and<br>Community Health Sciences<br>Yazdi, Fatemeh; Li Ka Shing Knowledge Institute, St. Michael's Hospital<br>D'Souza, Jennifer; Li Ka Shing Knowledge Institute, St. Michael's Hospital<br>MacDonald, Heather; Li Ka Shing Knowledge Institute, St. Michael's<br>Hospital<br>Tricco, Andrea; Li Ka Shing Knowledge Institute, St. Michael's Hospital;<br>University of Toronto, Epidemiology Division, Dalla Lana School of Public<br>Health |
| <b>Primary Subject<br>Heading</b>: | Neurology                                                                                                                                                                                                                                                                                                                                                                                                                                                                                                                                                                                                                                                                                                                                                                                                                                                                                                                                                                                                                                                                                                                                                                                                                                                                                                                                                                                                                                                                                                                                                                                                                                                                                                                          |
| Secondary Subject Heading:         | Obstetrics and gynaecology                                                                                                                                                                                                                                                                                                                                                                                                                                                                                                                                                                                                                                                                                                                                                                                                                                                                                                                                                                                                                                                                                                                                                                                                                                                                                                                                                                                                                                                                                                                                                                                                                                                                                                         |
| Keywords:                          | multiple treatment meta-analysis, knowledge synthesis, Epilepsy < NEUROLOGY, pregnancy, infants, developmental delay                                                                                                                                                                                                                                                                                                                                                                                                                                                                                                                                                                                                                                                                                                                                                                                                                                                                                                                                                                                                                                                                                                                                                                                                                                                                                                                                                                                                                                                                                                                                                                                                               |
|                                    |                                                                                                                                                                                                                                                                                                                                                                                                                                                                                                                                                                                                                                                                                                                                                                                                                                                                                                                                                                                                                                                                                                                                                                                                                                                                                                                                                                                                                                                                                                                                                                                                                                                                                                                                    |

1  
2  
3  
4  
5  
6  
7  
8  
9  
10  
11  
12  
13  
14  
15  
16  
17  
18  
19  
20  
21  
22  
23  
24  
25  
26  
27  
28  
29  
30  
31  
32  
33  
34  
35  
36  
37  
38  
39  
40  
41  
42  
43  
44  
45  
46  
47  
48  
49  
50  
51  
52  
53  
54  
55  
56  
57  
58  
59  
60

SCHOLARONE™  
Manuscripts

For peer review only

1  
2  
3  
4 1 **Comparative safety of anti-epileptic drugs for neurological**  
5  
6 2 **development in children exposed during pregnancy and**  
7  
8  
9 3 **breastfeeding: a systematic review and network meta-analysis**  
10

11 4 Areti Angeliki Veroniki, PhD, MSc<sup>1</sup> Email: [VeronikiA@smh.ca](mailto:VeronikiA@smh.ca)  
12  
13 5 Patricia Rios, MSc<sup>1</sup> Email: [RiosP@smh.ca](mailto:RiosP@smh.ca)  
14  
15 6 Elise Cogo, ND, MLIS<sup>1</sup> Email: [CogoE@smh.ca](mailto:CogoE@smh.ca)  
16  
17 7 Sharon E. Straus, MD, MSc<sup>1,2</sup> Email: [Sharon.straus@utoronto.ca](mailto:Sharon.straus@utoronto.ca)  
18  
19 8 Yaron Finkelstein, MD<sup>3,4,5</sup> Email: [Yaron.Finkelstein@sickkids.ca](mailto:Yaron.Finkelstein@sickkids.ca)  
20  
21 9 Ryan Kealey, PhD<sup>1</sup> Email: [ryan.kealey@utoronto.ca](mailto:ryan.kealey@utoronto.ca)  
22  
23 10 Emily Reynen, MD, CM, PharmD<sup>1</sup> Email: [ereynen@gmail.com](mailto:ereynen@gmail.com)  
24  
25 11 Charlene Soobiah, PhD (Cand.)<sup>1,6</sup> Email: [SoobiahC@smh.ca](mailto:SoobiahC@smh.ca)  
26  
27 12 Kednapa Thavorn, PhD<sup>7,8,9</sup> Email: [kthavorn@ohri.ca](mailto:kthavorn@ohri.ca)  
28  
29 13 Brian Hutton, PhD, MSc<sup>7,10</sup> Email: [bhutton@ohri.ca](mailto:bhutton@ohri.ca)  
30  
31 14 Brenda R. Hemmelgarn, MD, PhD<sup>11</sup> Email: [Bhemmelg@ucalgary.ca](mailto:Bhemmelg@ucalgary.ca)  
32  
33 15 Fatemeh Yazdi, MSc<sup>1</sup> Email: [SabaghYazdiF@smh.ca](mailto:SabaghYazdiF@smh.ca)  
34  
35 16 Jennifer D'Souza, HBSc<sup>1</sup> Email: [jennifer.dsouza@mail.utoronto.ca](mailto:jennifer.dsouza@mail.utoronto.ca)  
36  
37 17 Heather MacDonald, MSc<sup>1</sup> Email: [harmacdonald@gmail.com](mailto:harmacdonald@gmail.com)  
38  
39 18 Andrea C. Tricco, PhD, MSc<sup>1,12,\*</sup> Email: [TriccoA@smh.ca](mailto:TriccoA@smh.ca)  
40  
41  
42  
43  
44  
45  
46  
47

48 **AUTHOR DETAILS**  
49

50  
51 20 <sup>1</sup> Li Ka Shing Knowledge Institute, St. Michael's Hospital, 209 Victoria Street, East Building,  
52  
53 21 Toronto, Ontario, M5B 1W8, Canada  
54  
55  
56  
57  
58  
59  
60

- 1  
2  
3 22 <sup>2</sup> Department of Medicine, University of Toronto, 27 King's College Circle, Toronto, Ontario,  
4  
5 23 M5S 1A1, Canada  
6  
7  
8 24 <sup>3</sup> The Hospital for Sick Children, 555 University Avenue, Toronto, Ontario, M5G 1X8, Canada  
9  
10 25 <sup>4</sup> Department of Paediatrics, University of Toronto, 172 St. George Street, Toronto, Ontario,  
11  
12 26 M5R 0A3, Canada  
13  
14  
15 27 <sup>5</sup> Department of Pharmacology and Toxicology, University of Toronto, Medical Sciences  
16  
17 28 Building, Room 4207, 1 King's College Circle, Toronto, Ontario, M5S 1A8, Canada  
18  
19  
20 29 <sup>6</sup> Institute for Health Policy Management & Evaluation, University of Toronto, 4th Floor,  
21  
22 30 155 College Street, Toronto, Ontario, M5T 3M6, Canada  
23  
24  
25 31 <sup>7</sup> School of Epidemiology, Public Health and Preventive Medicine, Faculty of Medicine,  
26  
27 32 University of Ottawa, Roger-Guindon Building, 451 Smyth Road, Ottawa, Ontario, K1H 8M5,  
28  
29 33 Canada  
30  
31  
32 34 <sup>8</sup> Clinical Epidemiology Program, Ottawa Hospital Research Institute, The Ottawa Hospital,  
33  
34 35 501 Smyth Road, Ottawa, Ontario, K1H 8L6, Canada  
35  
36  
37 36 <sup>9</sup> Institute of Clinical and Evaluative Sciences (ICES uOttawa), 1053 Carling Avenue, Ottawa,  
38  
39 37 Ontario, K1Y 4E9, Canada  
40  
41  
42 38 <sup>10</sup> Ottawa Hospital Research Institute, Center for Practice Changing Research, The Ottawa  
43  
44 39 Hospital-General Campus, 501 Smyth Road, PO Box 201B, Ottawa, Ontario, K1H 8L6,  
45  
46 40 Canada.  
47  
48  
49 41 <sup>11</sup> Departments of Medicine and Community Health Sciences, University of Calgary, TRW  
50  
51 42 Building, 3rd Floor, 3280 Hospital Drive NW, Calgary, Alberta, T2N 4Z6, Canada  
52  
53  
54 43 <sup>12</sup> Epidemiology Division, Dalla Lana School of Public Health, University of Toronto, 6th  
55  
56 44 Floor, 155 College Street, Toronto, Ontario, M5T 3M7, Canada  
57  
58  
59  
60

1  
2  
3 45 **\*Corresponding author**  
4

5  
6 46 Prof. Andrea C. Tricco, PhD  
7

8 47 Scientist, Knowledge Translation Program,  
9

10 48 Li Ka Shing Knowledge Institute, St. Michael's Hospital,  
11

12 49 209 Victoria Street, East Building, Toronto, Ontario, M5B 1W8, Canada  
13

14 50 Phone: 416-864-6060, Fax: 416-864-5805, Email: [TriccoA@smh.ca](mailto:TriccoA@smh.ca)  
15  
16  
17

18 51  
19

20 52 **Keywords:** multiple treatment meta-analysis, knowledge synthesis, epilepsy, pregnancy,  
21  
22 53 infants, developmental delay.  
23

24 54 **Word count:** abstract (300 words); main text (4,000 words); 2 tables; 3 figures; 3  
25  
26 55 additional files; 51 references  
27  
28  
29  
30  
31  
32  
33  
34  
35  
36  
37  
38  
39  
40  
41  
42  
43  
44  
45  
46  
47  
48  
49  
50  
51  
52  
53  
54  
55  
56  
57  
58  
59  
60

1  
2  
3 56 **ABSTRACT**  
4  
5

6 57 **Objectives:** Compare the safety of anti-epileptic drugs (AEDs) on neurodevelopment of  
7  
8 58 infants/children exposed *in-utero* or during breastfeeding.  
9

10 59 **Design and Setting:** Systematic review and Bayesian random-effects network meta-  
11  
12 60 analysis (NMA). Medline, EMBASE, and the Cochrane Central Register of Controlled Trials  
13  
14 61 were searched until April 27<sup>th</sup>, 2017. Screening, data abstraction, and quality appraisal  
15  
16 62 were completed in duplicate by independent reviewers.  
17  
18

19  
20 63 **Participants:** 29 cohort studies including 5,100 infants/children.  
21  
22

23 64 **Interventions:** Mono- and poly-therapy AEDs including first-generation (carbamazepine,  
24  
25 65 clobazam, clonazepam, ethosuximide, phenobarbital, phenytoin, primidone, valproate) and  
26  
27 66 newer-generation (gabapentin, lamotrigine, levetiracetam, oxcarbazepine, topiramate,  
28  
29 67 vigabatrin) AEDs. Epileptic women who did not receive AEDs during pregnancy or  
30  
31 68 breastfeeding served as the control group.  
32  
33

34  
35 69 **Primary and secondary Outcome measures:** Cognitive developmental delay and  
36  
37 70 autism/dyspraxia were primary outcomes. Attention deficit hyperactivity disorder,  
38  
39 71 language delay, neonatal seizures, psychomotor developmental delay, and social  
40  
41 72 impairment were secondary outcomes.  
42  
43

44  
45 73 **Results:** The NMA on cognitive developmental delay (11 cohort studies, 933 children, 18  
46  
47 74 treatments) suggested among all AEDs only valproate was statistically significantly  
48  
49 75 associated with more children experiencing cognitive developmental delay when compared  
50  
51 76 with control (odds ratio (OR)=7.40, 95% credible interval (CrI): 3.00-18.46). The NMA on  
52  
53 77 autism (5 cohort studies, 2,551 children, 12 treatments), suggested that oxcarbazepine  
54  
55 78 (OR=13.51, CrI: 1.28-221.40), valproate (N=485, OR=17.29, 95% CrI: 2.40-217.60),  
56  
57  
58  
59  
60

1  
2  
3 79 lamotrigine (OR=8.88, CrI: 1.28-112.00), and lamotrigine+valproate (OR=132.70, CrI:  
4  
5  
6 80 7.41-3,851.00) were associated with significantly greater odds of developing autism  
7  
8 81 compared with control. The NMA on Psychomotor developmental delay (11 cohort studies,  
9  
10  
11 82 1,145 children, 18 treatments) found that valproate (OR=4.16, CrI: 2.04-8.75) and  
12  
13 83 carbamazepine+phenobarbital+valproate (OR=19.12, CrI: 1.49-337.50) were associated  
14  
15 84 with significantly greater odds of psychomotor delay compared with control.  
16  
17

18 85 **Conclusions:** Valproate alone or combined with another AED is associated with the  
19  
20 86 greatest odds of adverse neurodevelopmental outcomes compared with control.  
21  
22 87 Oxcarbazepine and lamotrigine were associated with increased occurrence of autism.  
23  
24 88 Counselling is advised for women considering pregnancy to tailor the safest regimen.  
25  
26  
27  
28  
29

30 90 **Registration:** PROSPERO database (CRD42014008925).  
31

32 91 **Keywords:** multiple treatment meta-analysis, knowledge synthesis, epilepsy, pregnancy,  
33  
34 92 infants, developmental delay.  
35  
36  
37

## 38 93 **ARTICLE SUMMARY**

### 39 40 41 42 94 **Strengths and limitations of this study**

- 43  
44  
45 95 • 29 cohort studies involving 5,100 children of women who took AEDs were included  
46  
47 in this systematic review. More evidence from long-term follow-up studies is  
48 96 required.  
49  
50 97  
51  
52 98 • This study was the first that compared and ranked the safety of AEDs, including  
53  
54 comparative safety of treatments that have not been directly compared.  
55  
56  
57  
58  
59  
60

1  
2  
3  
4  
5  
6  
7  
8  
9  
10  
11  
12  
13  
14  
15  
16  
17  
18  
19  
20  
21  
22  
23  
24  
25  
26  
27  
28  
29  
30  
31  
32  
33  
34  
35  
36  
37  
38  
39  
40  
41  
42  
43  
44  
45  
46  
47  
48  
49  
50  
51  
52  
53  
54  
55  
56  
57  
58  
59  
60

- 100 • Across all neurological outcomes and treatments compared with control, valproate  
101 alone or combined with another AED is associated with the greatest odds of adverse  
102 development.
- 103 • Oxcarbazepine and lamotrigine were associated with increased occurrence of  
104 autism.

For peer review only



## 105 INTRODUCTION

106 Anti-epileptic drugs (AEDs) are used by pregnant women for various conditions, such as  
107 epilepsy, pain syndromes, psychiatric disorders, and chronic migraine.<sup>1</sup> AED use during  
108 pregnancy is associated with risks to the fetus, as these drugs can cross the placenta or may  
109 be transferred to the infant through breastfeeding and may be associated with adverse  
110 neurodevelopment outcomes.<sup>2-4</sup> Two systematic reviews examined the association  
111 between AED exposure and neurodevelopment *in utero*, and reported that exposure to  
112 valproate was linked to significantly lower IQ scores and poorer overall  
113 neurodevelopmental outcomes in the children of women who used these medications.<sup>5,6</sup> No  
114 significant associations were found between neurodevelopment and exposure to other  
115 AEDs such as carbamazepine, lamotrigine, or phenytoin.<sup>5-8</sup> However, there is a lack of  
116 sufficiently powered studies to assess the impact of AEDs on neurodevelopment in children  
117 of women exposed to these agents, especially for newer generation drugs, thus highlighting  
118 the need for a systematic review.<sup>9,10</sup>

119 The aim of this study was to compare the safety of AEDs and assess their impact on  
120 neurodevelopment in infants and children exposed *in-utero* or during breastfeeding,  
121 employing a systematic review and network meta-analysis (NMA).

## 122 **METHODS**

123 The methods are briefly described here; details can be found in the published protocol  
124 (Additional File 1).<sup>11</sup> This study was registered with PROSPERO (CRD42014008925). We  
125 followed the ISPOR<sup>12</sup> guidelines for our NMA, and reported our findings using the PRISMA  
126 extension for NMA (Additional File 2).<sup>13</sup>

### 127 **Eligibility criteria**

128 All randomized clinical trials (RCTs), quasi-RCTs, and observational studies were eligible.  
129 Included studies assessed infants or children  $\leq 12$  years of age whose mothers consumed  
130 AEDs during pregnancy and/or while breastfeeding. Both mono- and poly-therapy AEDs  
131 were eligible, including first-generation (i.e., carbamazepine, clobazam, clonazepam,  
132 ethosuximide, phenobarbital, phenytoin, primidone, valproate) and newer-generation (i.e.,  
133 marketed >1990: gabapentin, lamotrigine, levetiracetam, oxcarbazepine, topiramate,  
134 vigabatrin), with no restrictions on AED dosage. Placebo, no AED, other AEDs alone or in  
135 combination, were considered as comparators. Duplicate studies that used the same  
136 registry or population sample (i.e., companion studies) were used for supplementary  
137 information only. No language or other restrictions were imposed.

138 The primary neurological outcomes were cognitive developmental delay and  
139 autism/dyspraxia, and the secondary outcomes included attention deficit hyperactivity  
140 disorder (ADHD), language delay, neonatal seizures, psychomotor developmental delay,  
141 and social impairment. Table 1 shows the outcome measures and diagnostic scales used.  
142 We initially intended to evaluate all safety outcomes in infants/ children exposed to AEDs  
143 *in-utero* or during breastfeeding in one publication, but given the breadth of evidence we

1  
2  
3 144 identified, we report results related to risk of major congenital malformations, birth, and  
4  
5 145 prenatal outcomes in a companion paper.<sup>14</sup>  
6  
7

### 8 146 **Information sources**

9  
10 147 An experienced librarian executed search strategies for MEDLINE, EMBASE, and the  
11  
12 148 Cochrane Central Register of Controlled Trials up to March 18, 2014, and then updated the  
13  
14 149 search in April 27<sup>th</sup> 2017. The search strategy for MEDLINE was peer-reviewed by another  
15  
16 150 librarian using the PRESS checklist,<sup>15</sup> and is available in the protocol.<sup>11</sup> Additional studies  
17  
18 151 were identified by scanning references and contacting authors. Unpublished studies were  
19  
20 152 sought by searching clinical trial registries and conference abstracts.  
21  
22  
23

### 24 153 **Study selection and data collection**

25  
26 154 After a calibration exercise, titles/abstracts (level 1) and full-text papers (level 2) were  
27  
28 155 screened by two reviewers independently. Upon completion of level 1, 6% of citations were  
29  
30 156 discrepant between reviewer pairs, whereas at the conclusion of level 2, 16% of articles  
31  
32 157 were discrepant. Conflicts were resolved through discussion or by a third reviewer. The  
33  
34 158 same approach was used for data abstraction and appraisal of methodological quality.  
35  
36 159 Three rounds of pilot testing were conducted prior to data abstraction to train reviewers  
37  
38 160 and refine the data abstraction form. For studies published in the last 10 years, authors  
39  
40 161 were contacted to request clarification or additional data.  
41  
42  
43  
44  
45

### 46 162 **Appraisal of methodological quality**

47  
48 163 Only observational studies were identified and included for analysis, and their  
49  
50 164 methodological quality was appraised with the Newcastle-Ottawa Scale (NOS) (Additional  
51  
52 165 File 3: Appendix A).<sup>16</sup> For each outcome with  $\geq 10$  studies, the comparison-adjusted funnel  
53  
54 166 plot was used to assess small-study effects,<sup>17</sup> where the overall treatment effect for each  
55  
56  
57  
58  
59  
60

1  
2  
3 167 comparison was estimated under the fixed-effect meta-analysis model. All eligible  
4  
5  
6 168 medications were ordered from oldest to newest using their international market approval  
7  
8 169 dates. Hence, the comparison-adjusted funnel plot additionally assesses the hypothesis that  
9  
10  
11 170 newer AEDs are favoured over older ones. To overcome some of the correlations induced  
12  
13 171 by multi-arm studies, which may cause overestimation and mask funnel plot asymmetry,  
14  
15 172 we plotted data points corresponding to the study-specific basic parameters (treatment  
16  
17  
18 173 comparisons with common comparator). In each study, we used the control group as the  
19  
20 174 common comparator or if this was missing, we used the oldest treatment comparator  
21  
22  
23 175 against the remaining AEDs.

### 24 25 176 **Synthesis of included studies**

26  
27 177 We used the odds ratio (OR) for each dichotomous outcome, and outcome data were  
28  
29  
30 178 pooled using hierarchical meta-analysis and NMA models and the Markov Chain Monte  
31  
32 179 Carlo sampling method in a Bayesian framework. To account for anticipated  
33  
34  
35 180 methodological and clinical heterogeneity across studies, and to achieve the highest  
36  
37 181 generalizability in the meta-analytical treatment effects, we applied a random-effects  
38  
39 182 model.<sup>18</sup>  
40  
41  
42 183 A NMA was applied for connected evidence networks and pre-specified treatment nodes.<sup>19</sup>  
43  
44 184 We assessed the transitivity assumption for each outcome *a priori* using the effect  
45  
46 185 modifiers: age, baseline risk, treatment indication, timing, and methodological quality. The  
47  
48 186 mean of each continuous effect modifier and the mode of each categorical effect modifier  
49  
50  
51 187 for each pairwise comparison were presented in tables for each outcome.<sup>20</sup> The consistency  
52  
53  
54 188 assumption was evaluated for the entire network of each outcome using the random-  
55  
56 189 effects design-by-treatment interaction model when multiple studies were available in  
57  
58  
59  
60

1  
2  
3 190 each network design or the fixed-effect design-by-treatment interaction model when a  
4  
5  
6 191 single study informed each network design.<sup>21</sup> If inconsistency was identified, further  
7  
8 192 examination for local inconsistency in parts of the network was completed using the loop-  
9  
10 193 specific method.<sup>22 23</sup> Common within-network between-study variance ( $\tau^2$ ) across  
11  
12 194 treatment comparisons was assumed in the meta-analysis, NMA, and design-by-treatment  
13  
14 195 interaction model, so that treatment comparisons including a single study can borrow  
15  
16 196 strength from the remaining network. This assumption was clinically reasonable, as the  
17  
18 197 treatments included were of the same nature. In the loop-specific approach, common  
19  
20 198 within-loop  $\tau^2$  was assumed.

21  
22 199 For cognitive developmental delay and autism/dyspraxia outcomes, network meta-  
23  
24 200 regression analyses for maternal age and baseline risk (i.e., using the control group) were  
25  
26 201 conducted, when  $\geq 10$  studies provided relevant information, assuming a common fixed  
27  
28 202 coefficient across treatment comparisons for AEDs vs. control. Sensitivity analyses for  
29  
30 203 cognitive developmental delay and autism/dyspraxia outcomes were performed for  
31  
32 204 treatment indication of epilepsy, large study size (i.e.,  $>300$ ), maternal alcohol intake,  
33  
34 205 maternal tobacco use, only first-generation AEDs, and methodological quality. The  
35  
36 206 sensitivity analysis for methodological quality was restricted to studies with low risk of  
37  
38 207 bias for the two items on the NOS where the greatest proportion of studies received a low-  
39  
40 208 quality score: adequacy of follow-up of cohorts and comparability of cohorts. For  
41  
42 209 autism/dyspraxia, a sensitivity analysis on maternal IQ/psychiatric history was  
43  
44 210 additionally conducted. We measured the goodness of fit using the posterior mean of the  
45  
46 211 residual deviance, the degree of  $\tau^2$ , and the deviance information criterion (DIC). In a well-  
47  
48 212 fitting model the posterior mean residual deviance should be close to the number of data  
49  
50  
51  
52  
53  
54  
55  
56  
57  
58  
59  
60

1  
2  
3 213 points.<sup>24 25</sup> A difference of 3 units in the DIC between a NMA and a network meta-  
4  
5  
6 214 regression model was considered important and the lowest value of the DIC corresponded  
7  
8 215 to the model with the best fit.<sup>24 25</sup>  
9  
10 216 All analyses were conducted in OpenBUGS<sup>26</sup> assuming non-informative priors for all model  
11  
12 217 parameters, and  $\tau \sim N(0,1)$ ,  $\tau > 0$ . The first 10,000 iterations were discarded and then  
13  
14 218 100,000 simulations were run with thinning of 10 values. Convergence was checked by  
15  
16 219 visual inspection of the evaluation of the mixing of two chains. The median and 95% CrI  
17  
18 220 were calculated for each parameter value. The *network* command<sup>27</sup> was used to apply the  
19  
20 221 design-by-treatment interaction model.  
21  
22 222 For NMA estimates, a 95% predictive interval (PrI) is also reported to capture the  
23  
24 223 magnitude of  $\tau^2$  and present the interval within which the treatment effect of a future  
25  
26 224 study is expected to lie.<sup>28 29</sup> The estimated safety of the included AEDs was ranked using the  
27  
28 225 surface under the cumulative ranking (SUCRA) curve.<sup>30</sup> The larger the SUCRA for a  
29  
30 226 treatment, the higher its safety rank among all the available treatment options. SUCRA  
31  
32 227 values are presented along with 95% CrIs to capture the uncertainty in the parameter  
33  
34 228 values.<sup>31</sup>  
35  
36  
37  
38  
39  
40  
41  
42  
43  
44  
45  
46  
47  
48  
49  
50  
51  
52  
53  
54  
55  
56  
57  
58  
59  
60

## 229 **RESULTS**

### 230 **Literature search and included studies**

231 Our literature search identified 5,707 titles and abstracts, which after the screening process  
232 yielded 681 articles potentially relevant for inclusion (Figure 1). After full-text review, 95  
233 studies fulfilled eligibility criteria along with 17 studies identified through supplemental  
234 methods. Of the 112 total eligible studies in the complete review,<sup>14</sup> 29 articles with seven  
235 companion reports and two potentially overlapping registry studies included one or more  
236 relevant neurological outcomes (Additional File 3: Appendix B). Four of the studies  
237 included in this analysis were conference abstracts with usable data,<sup>32-35</sup> and four  
238 studies,<sup>36-39</sup> not captured in the original literature search, were identified through  
239 reference scanning. A table with the key excluded studies and a rationale for their exclusion  
240 is presented in Additional File 3: Appendix C.

### 241 **Study and patient characteristics**

242 We included 29 cohort studies (5,100 patients) published between 1989 and 2016 (Table  
243 2; Additional File 3: Appendix D, E). The number of patients included in each study ranged  
244 from 23 to 2,011 (median 74.5). Most studies (76%) were published after 2000, 62% of the  
245 studies included fewer than 100 patients, and the 52% of the studies included a control  
246 group of pregnant/breastfeeding women with epilepsy who did not receive AEDs. The  
247 mean maternal age ranged from 24 to 34 years. About half of the studies (52%) were  
248 funded through government/public research funding.

### 249 **Methodological quality results**

250 Twenty-nine observational studies were appraised using the NOS (Additional File 3:  
251 Appendix F). Overall, the studies were of good methodological quality and were rated as

1  
2  
3 252 high quality across most items: 28 studies (97%) selected the non-exposed cohort from the  
4  
5 253 same community as the exposed cohort, 26 (90%) included a representative or somewhat  
6  
7  
8 254 representative sample, 27 (93%) assessed outcomes independently, with blinding, or via a  
9  
10 255 record linkage (e.g., identified through database records), and 23 (79%) ascertained  
11  
12 256 exposure via secured records (e.g., database records) or structured interviews. The  
13  
14 257 comparability of cohorts and adequacy of follow-up were the lowest scoring items across  
15  
16 258 the studies with only 12 (41%) and 10 (34%) studies rated as high quality on these items.  
17  
18 259 No evidence for small-study effects was identified by the visual inspection of the  
19  
20 260 comparison-adjusted funnel plots (Additional File 3: Appendix G).  
21  
22  
23  
24

### 25 261 **Statistical analysis results**

26  
27 262 No important concerns were raised regarding the violation of the transitivity assumption  
28  
29 263 when maternal age, baseline risk, treatment indication, and timing were assessed  
30  
31 264 (Additional File 3: Appendix H). However, the average methodological quality appraisal  
32  
33 265 across treatment comparisons varied across treatment comparisons. The evaluation of the  
34  
35 266 consistency assumption using the design-by-treatment interaction model suggested that  
36  
37 267 there was no evidence of significant inconsistency across all outcomes (Additional File 3:  
38  
39 268 Appendix H).  
40  
41  
42  
43

44 269 In the following sections, we present the significant NMA results by outcome for AEDs  
45  
46 270 compared with control (i.e., no exposure to AEDs), while the SUCRA values from all  
47  
48 271 outcomes are presented in Figure 2 and depicted in a rank-heat plot (<http://rh.ktss.ca/>)<sup>40</sup>  
49  
50 272 in Additional File 3: Appendix I.  
51  
52  
53

### 54 273 **Cognitive developmental delay**



1  
2  
3 274 The NMA for cognitive developmental delay (definitions in Table 1) included 11 cohort  
4  
5  
6 275 studies, 933 children, and examined 18 treatments (Figure 3a; Additional File 3: Appendix  
7  
8 276 J;  $\tau^2=0.12$ , 95% CrI: 0.00-1.15). One study included children exposed to AEDs both *in-utero*  
9  
10 277 and through breastfeeding, and ten included children exposed to AEDs *in-utero*. Across all  
11  
12 278 AEDs, only valproate was associated with significantly increased odds of cognitive  
13  
14 279 developmental delay when compared with control (odds ratio (OR)=7.40, 95% credible  
15  
16 280 interval (CrI): 3.00-18.46; Figure 2a; Additional File 3: Appendix H).

17  
18 281 The same results were observed in a network meta-regression of baseline risk for offspring  
19  
20 282 of women with epilepsy who were not exposed to AEDs (estimated regression coefficient  
21  
22 283 on OR scale: 1.01, 95% CrI: 0.76-1.56;  $\tau^2=0.16$ , 95% CrI: 0.00-1.24; residual deviance=  
23  
24 284 45.27, data points= 47, DIC= 80.17). Similarly, the sensitivity analyses restricted to: a)  
25  
26 285 studies that only included women receiving AEDs to treat epilepsy (10 studies, 910  
27  
28 286 children, 17 treatments;  $\tau^2=0.16$ , 95% CrI: 0.00-1.36), b) studies comparing only first-  
29  
30 287 generation AEDs (6 studies, 480 children, 13 treatments;  $\tau^2=0.28$ , 95% CrI: 0.00-2.97), c)  
31  
32 288 studies that reported maternal alcohol or tobacco use (3 studies, 504 children, 7  
33  
34 289 treatments;  $\tau^2=0.27$ , 95% CrI: 0.00-3.29), and d) studies with high methodological quality  
35  
36 290 on NOS item 'comparability of cohorts' (3 studies, 366 children, 7 treatments;  $\tau^2=0.38$ , 95%  
37  
38 291 CrI: 0.00-4.14), were consistent with the NMA results (Additional File 3: Appendix K). The  
39  
40 292 sensitivity analysis with studies of high methodological quality on the NOS item 'adequacy  
41  
42 293 of follow-up' found no statistically significant results (4 studies, 283 patients, 12  
43  
44 294 treatments;  $\tau^2=1.01$ , 95% CrI: 0.01-5.85; Additional File 3: Appendix K).

## 53 295 **Autism/dyspraxia**

54  
55  
56  
57  
58  
59  
60

1  
2  
3 296 The NMA on autism/dyspraxia (definitions in Table 1) included five cohort studies, 2,551  
4  
5  
6 297 children exposed *in utero*, and examined 12 treatments ( $\tau^2=0.16$ , 95% CrI: 0.00-1.95;  
7  
8 298 Figure 3b; Additional File 3: Appendix H). Compared with control, only valproate  
9  
10 299 (OR=17.29, 95% CrI: 2.40-217.60), oxcarbazepine (OR= 13.51, 95% CrI: 1.28-221.40),  
11  
12 300 lamotrigine (OR= 8.88, 95% CrI: 1.28-112.00), and lamotrigine+valproate (OR=132.70,  
13  
14 301 95% CrI: 7.41-3851.00) were significantly associated with increased occurrence of  
15  
16 302 autism/dyspraxia (Figure 2b).  
17  
18 303 Restricting the NMA to studies including only women with epilepsy as their treatment  
19  
20 304 indication produced results that were generally in agreement with the NMA results, except  
21  
22 305 that oxcarbazepine was no longer in the network (4 cohort studies, 540 children, 10  
23  
24 306 treatments;  $\tau^2=0.31$ , 95% CrI: 0.00-304). Two cohort studies of 404 offspring of women  
25  
26 307 with a history of tobacco use compared 4 treatments and found similar results except that  
27  
28 308 oxcarbazepine and lamotrigine+valproate were no longer in the network ( $\tau^2=0.39$ , 95%  
29  
30 309 CrI: 0.00-4.47). The results were in agreement in sensitivity analyses including only higher  
31  
32 310 methodological quality studies in the 'comparability of cohorts' item on the NOS (4 studies,  
33  
34 311 2,395 children, 12 treatments;  $\tau^2=0.19$ , 95% CrI: 0.00-2.43) and the 'adequacy of follow-up  
35  
36 312 of cohorts' (3 studies, 2244 children, 10 treatments;  $\tau^2=0.23$ , 95% CrI: 0.00-2.88), except  
37  
38 313 that lamotrigine was no longer statistically significant than control for the latter  
39  
40 314 (Additional File 3: Appendix K).  
41  
42  
43  
44  
45  
46  
47  
48

### 315 **Neonatal Seizure**

49  
50 316 One cohort study included 72 children who were exposed to AEDs *in-utero* as well as  
51  
52 317 through breastfeeding reported on the incidence of neonatal seizures. The study compared  
53  
54  
55  
56  
57  
58  
59  
60

1  
2  
3 318 valproate against lamotrigine and found no significant difference in neonatal seizures  
4  
5  
6 319 between the two drugs (OR=0.18, 95% CI: 0.01-3.70).  
7

### 8 320 **Psychomotor developmental delay**

9  
10 321 The NMA on psychomotor developmental delay (definitions in Table 1) included 11 cohort  
11  
12 322 studies, 1,145 children exposed *in utero*, and examined 18 treatments ( $\tau^2=0.06$ , 95% CrI:  
13  
14 323 0.00-0.63; Figure 3c; Additional File 3: Appendices H, J). Valproate (OR=4.16, 95% CrI:  
15  
16 324 2.04-8.75) and carbamazepine+phenobarbital+valproate (OR=19.12, 95% CrI: 1.49-  
17  
18 325 337.50) were significantly more harmful than control (Figure 2c).  
19  
20  
21

### 22 326 **Language delay**

23  
24  
25 327 The NMA on language delay (definitions in Table 1) included five cohort studies, 509  
26  
27 328 children, and examined five treatments ( $\tau^2=0.16$ , 95% CrI: 0.00-2.15; Figure 3d; Additional  
28  
29 329 File 3: Appendices H, J). One study included children exposed to AEDs *in-utero* and through  
30  
31 330 breastfeeding, and four included children exposed to AEDs *in-utero*. Compared with  
32  
33 331 control, valproate was the only treatment significantly associated with increased odds of  
34  
35 332 language delay (OR=7.95, 95% CrI: 1.50-49.13; Figure 2d).  
36  
37  
38

### 39 333 **Attention deficit hyperactivity disorder**

40  
41  
42 334 The NMA on ADHD (definitions in Table 1) included five cohort studies, 816 children, and  
43  
44 335 examined seven treatments ( $\tau^2=0.11$ , 95% CrI: 0.00-1.29). One study included children  
45  
46 336 exposed to AEDs *in-utero* and through breastfeeding, while four studies included children  
47  
48 337 exposed to AEDs *in-utero*. None of the treatment comparisons reached statistical  
49  
50 338 significance (Figure 3e; Figure 2e; Additional File 3: Appendices H, J).  
51  
52

### 53 339 **Social Impairment**

1  
2  
3 340 One cohort study included 422 children exposed to AEDs *in-utero* as well as through  
4  
5  
6 341 breastfeeding. The children were exposed to carbamazepine (n=48), lamotrigine (n=71),  
7  
8 342 valproate (n=27) and control (n=278). No significant differences in social impairment were  
9  
10 343 identified.<sup>41</sup>  
11  
12  
13 344

For peer review only

1  
2  
3 345 **DISCUSSION**  
4  
5

6 346 Our results suggest that AEDs generally pose a risk for infants and children exposed *in-*  
7  
8 347 *utero* or during breastfeeding. Valproate was significantly associated with more children  
9  
10 348 experiencing autism/dyspraxia, language, cognitive and psychomotor developmental  
11  
12 349 delays versus children who were not exposed to AEDs. Oxcarbazepine, lamotrigine and  
13  
14 350 lamotrigine+valproate were associated with increased occurrence of autism/dyspraxia,  
15  
16 351 whereas for the cognitive developmental delay and psychomotor developmental delay  
17  
18 352 outcomes, children exposed to the combination of carbamazepine, phenobarbital, and  
19  
20 353 valproate were at greater odds of harm than those who were not exposed to AEDs.  
21  
22 354 However, these results should be interpreted with caution, as a number of factors (e.g.,  
23  
24 355 anticonvulsant dosing, severity of epilepsy, duration of exposure, serum concentrations of  
25  
26 356 exposure, mother's IQ/education) that may all influence outcomes were not identified in  
27  
28 357 these studies. Also, our subsequent analyses may be underpowered due to missing data  
29  
30 358 (e.g., 17 of the 27 studies did not report maternal age, 23 of 27 studies did not report  
31  
32 359 alcohol use, 22 of 27 studies did not report tobacco use, and 14 of 27 studies did not  
33  
34 360 include control group).  
35  
36 361 NMA is a particularly useful tool for decision-makers because it allows the ranking of  
37  
38 362 treatments for each outcome. However, the results of our SUCRA curves should be  
39  
40 363 interpreted with caution, especially due to the small number of studies and children  
41  
42 364 included in each NMA, which is also reflected in the high uncertainty around the SUCRA  
43  
44 365 values (Figure 2).<sup>31</sup>  
45  
46 366 Our results are consistent with a longitudinal study of 311 children that found exposure to  
47  
48 367 lamotrigine was associated with significantly higher IQ scores and verbal function at six  
49  
50  
51  
52  
53  
54  
55  
56  
57  
58  
59  
60

1  
2  
3 368 years of age compared to children exposed to valproate (Additional File 3: Appendix C).<sup>7</sup> As  
4  
5  
6 369 indicated in Additional File 3: Appendix C, we were unable to include this study because the  
7  
8 370 outcome was reported as a continuous measure, where we focused on dichotomous  
9  
10 371 outcomes to facilitate interpretation. Our results are supported by findings from a cohort  
11  
12 372 study, which found that children exposed to levetiracetam were not at increased risk for  
13  
14 373 delayed development compared to unexposed children (Additional File 3: Appendix C).<sup>42</sup>  
15  
16 374 As indicated in Additional File 3: Appendix C, we were unable to include this study due to  
17  
18 375 the same reason as above. A NMA of 195 RCTs (including 28,013 both male and female  
19  
20 376 patients) showed that gabapentin and levetiracetam showed the best tolerability profile  
21  
22 377 compared with other AEDs, whereas oxcarbazepine and topiramate had a higher  
23  
24 378 withdrawal rate, and lamotrigine an intermediate withdrawal rate.<sup>43</sup>  
25  
26 379 Across all outcomes, valproate alone or combined with another AED (even with a newer-  
27  
28 380 generation agent, e.g., lamotrigine) was associated with the greatest odds. Similarly, two  
29  
30 381 previous systematic reviews that did not conduct a NMA found valproate was associated  
31  
32 382 with significantly lower IQ scores and poorer overall neurodevelopmental outcomes when  
33  
34 383 compared to an unexposed control group.<sup>5 6</sup> Also consistent with our results, a 2014  
35  
36 384 Cochrane review including 28 studies (10 of these studies were included in the meta-  
37  
38 385 analyses; with a maximum number of five studies per meta-analysis) concluded that AED  
39  
40 386 polytherapy led to poorer developmental outcomes and IQ compared to healthy controls,  
41  
42 387 epileptic controls, and unspecified monotherapy.<sup>5</sup> This Cochrane review also concluded  
43  
44 388 that insufficient data exist for newer AEDs. However, unlike our review, it included and  
45  
46 389 analysed fewer studies, and did not differentiate between specific polytherapy regimens,  
47  
48 390 and thus did not compare these regimens versus each other or specific monotherapy AEDs.  
49  
50  
51  
52  
53  
54  
55  
56  
57  
58  
59  
60

1  
2  
3 391 These risks must be balanced with the need to control seizure activity in pregnancy and  
4  
5  
6 392 thus informed decision-making by patients and clinicians is critical.  
7  
8 393 Strengths of our study include a comprehensive systematic review methodology that  
9  
10 394 followed the Cochrane Handbook<sup>44</sup> and ISPOR<sup>12</sup> guidelines, and reported using the PRISMA  
11  
12 395 extension for NMA.<sup>13</sup> To the best of our knowledge, our study was the first that compared  
13  
14 396 and ranked the safety of AEDs. We evaluated the comparative safety of treatments that  
15  
16 397 have not been directly compared head-to-head before. In addition, we calculated predictive  
17  
18 398 intervals, which account for between-study variation and provide a predicted range for the  
19  
20 399 treatment effect estimate, should a future study be conducted. On average, the predictive  
21  
22 400 intervals suggested that our results are robust.  
23  
24  
25 401 Our systematic review has a few limitations worth noting. First, due to the complexity of  
26  
27 402 the data and the studies' underreporting, differences in drug dosages could not be  
28  
29 403 accounted for, and it was assumed that different dosages of the same AED were equally  
30  
31 404 effective. When a study reported multiple dosages for the same treatment, we combined  
32  
33 405 the data for this treatment. This is common for cohort studies, which report on a number of  
34  
35 406 different types of exposures amongst patients. Second, several polytherapies had high  
36  
37 407 SUCRA estimates but very wide CrIs, which is due to the small number of studies included  
38  
39 408 for each drug combination with underpowered sample sizes. Evidence suggests that  
40  
41 409 ranking probabilities for a treatment of being the best may be biased toward the  
42  
43 410 treatments with the smallest number of studies, which may have influenced our SUCRA  
44  
45 411 results.<sup>31 45</sup> As such, the effect sizes need to be taken into account when considering the  
46  
47 412 SUCRA values. Third, due to the absence of evidence from RCTs, our conclusions were  
48  
49 413 based on evidence from observational studies only, and inherent biases because of  
50  
51  
52  
53  
54  
55  
56  
57  
58  
59  
60

1  
2  
3 414 confounding and shortcomings of these studies may have impacted our findings. For  
4  
5  
6 415 example, the included studies often failed to report important treatment effect modifiers,<sup>46</sup>  
7  
8 416 such as family history of autism, ADHD, and maternal IQ, severity of epilepsy making it  
9  
10 417 impossible for us to explore their impact through subgroup analysis and meta-regression.  
11  
12 418 Recent research has explored methods to incorporate non-randomized with randomized  
13  
14 419 evidence in a NMA and have highlighted the need to carefully explore the level of  
15  
16 420 confidence in the non-randomized evidence.<sup>47 48</sup> The use of observational studies allows  
17  
18 421 the assessment of the safety profile of AED treatments and offers the opportunity to  
19  
20 422 evaluate effects in pregnancy.<sup>49</sup> Future large-scale observational studies are needed to  
21  
22 423 allow the evaluation of rare adverse events that otherwise cannot be adequately evaluated  
23  
24 424 in RCTs, especially during pregnancy. Fourth, although no intransitivity for most effect  
25  
26 425 modifiers assessed was evident, there was an imbalance in the methodological study  
27  
28 426 quality appraisal across treatment comparisons and most outcomes, which may impact our  
29  
30 427 results. Unknown factors or factors that could not be assessed due to dearth of data may  
31  
32 428 pose the risk of residual confounding bias, and hence risk the validity of the transitivity  
33  
34 429 assumption. However, the assessment of consistency suggested no disagreement between  
35  
36 430 the different sources of evidence in the network. Fifth, although the tendency towards  
37  
38 431 small-study effects is greater with observational studies than with randomized trials,<sup>50</sup> the  
39  
40 432 assessment of small-study effects using adjusted funnel plots suggested no evidence for  
41  
42 433 their prevalence. Also, the majority of the included studies in this review compared  
43  
44 434 multiple treatments inducing correlations in each funnel plot, which may mask asymmetry.  
45  
46 435 Although we plotted data points corresponding to the study-specific basic parameters to  
47  
48 436 reduce correlations, this issue may still exist. Sixth, we were unable to conduct subgroup  
49  
50  
51  
52  
53  
54  
55  
56  
57  
58  
59  
60



1  
2  
3 437 analysis by type of exposure (breastfeeding versus *in utero*) due to the small number of  
4  
5  
6 438 studies included in the NMA and due to the poor reporting; 22 studies did not report  
7  
8 439 whether exposure was also in breastfeeding (additional to *in utero*). Hence, we included all  
9  
10 440 studies in the analysis irrespective of the type of exposure.

11  
12  
13 441 More evidence from long-term follow-up studies is required to further delineate  
14  
15 442 neurodevelopmental risks in children. Future studies should assess the genetic  
16  
17  
18 443 contribution from the biological father, maternal seizures during pregnancy, exposure  
19  
20 444 through breastfeeding only, types of epilepsy, and maternal family history. Registries  
21  
22 445 should aim to include a suitable control group and collect information on potential  
23  
24  
25 446 confounders, such as alcohol and tobacco use, allowing researchers to identify the safest  
26  
27  
28 447 agents for different patient-level covariates, and enhance decision-making for healthcare  
29  
30 448 providers and patients. A critical evaluation of the validity of the control group is also  
31  
32 449 necessary, in order to examine potential differences between the treated and the not  
33  
34  
35 450 treated populations. An individual patient data NMA would likely provide further clarity to  
36  
37 451 the field, which allows the tailoring of management to specific patient characteristics.<sup>51</sup>

## 38 39 452 **CONCLUSION**

40  
41  
42 453 Across all outcomes and treatments compared with control, valproate alone or combined  
43  
44 454 with another AED was associated with the greatest odds, whereas oxcarbazepine and  
45  
46  
47 455 lamotrigine were associated with increased occurrence of autism. Counselling is advised  
48  
49 456 for women considering pregnancy to tailor the safest regimen.  
50  
51  
52  
53  
54  
55  
56  
57  
58  
59  
60

1  
2  
3 457 **LIST OF ABBREVIATIONS**

4  
5  
6 458 AEDs: Anti-epileptic drugs; CrI: Credible interval; NMA: Network Meta-analysis; OR: Odds  
7  
8 459 ratio; PrI: Predictive interval; SUCRA curve: Surface under the cumulative ranking curve

9  
10  
11 460 **ADDITIONAL FILES**

12  
13  
14 461 **Additional File 1: Protocol**

15  
16  
17 462 **Additional File 2: PRISMA NMA Checklist**

18  
19  
20 463 **Additional File 3: Supplementary Online Content (Appendices A-O)**

21  
22  
23 464 Appendix A. Newcastle-Ottawa Scale scoring guide

24  
25 465 Appendix B. List of included studies

26  
27 466 Appendix C. Key Excluded Studies

28  
29 467 Appendix D. Table of Individual Study Characteristics

30  
31 468 Appendix E. Table of Patient Characteristics

32  
33 469 Appendix F. Methodological quality of observational studies – Newcastle Ottawa Scale

34  
35 470 Appendix G. Comparison-adjusted funnel plots

36  
37 471 Appendix H. Statistically significant network meta-analysis results along with meta-

38  
39 472 analysis results, transitivity, and inconsistency assessments

40  
41 473 Appendix I. Rank-heat plot of cognitive developmental delay, autism/dyspraxia,  
42  
43 474 psychomotor developmental delay, language delay, and attention deficit hyperactivity

44  
45 475 disorder outcomes

46  
47 476 Appendix J. Number of studies and treatments per outcome

48  
49 477 Appendix K. Sensitivity and network meta-regression analyses - Anti-epileptic drugs

50  
51 478 compared with Control

1  
2  
3 479 **FIGURE LEGENDS**

4  
5  
6 480 **Figure 1. Study flow diagram**

7  
8  
9  
10 481 **Figure 2. Forest plots for cognitive developmental delay, autism/dyspraxia,**  
11  
12 482 **psychomotor developmental delay, language delay, and attention deficit**  
13  
14 483 **hyperactivity disorder outcome**

15  
16  
17  
18 484 **Figure 3. Network diagrams for cognitive developmental delay, autism/dyspraxia,**  
19  
20 485 **psychomotor developmental delay, language delay, and attention deficit**  
21  
22 486 **hyperactivity disorder outcomes**

23  
24  
25 487 *Each treatment node is weighted according to the number of patients that have received the*  
26  
27 488 *particular treatment, and each edge is weighted according to the number of studies*  
28  
29 489 *comparing the treatments it connects.*

30  
31  
32 490 *Abbreviations: carbam - carbamazepine, clobaz - clobazam, clonaz - clonazepam, ethos -*  
33  
34 491 *ethosuximide, gabap - gabapentin, lamot - lamotrigine, levet - levetiracetam, oxcar -*  
35  
36 492 *oxcarbazepine, pheno - phenobarbital, pheny - phenytoin, primid - primidone, topir -*  
37  
38 493 *topiramate, valpro - valproate, vigab - vigabatrin*

1  
2  
3 494 **DECLARATIONS**

5  
6 495 **CONTRIBUTORS**

7  
8 496 AAV analysed the data, interpreted the results, and drafted the manuscript. ACT and SES  
9  
10 497 conceived and designed the study, helped obtain funding, interpreted the results, and  
11  
12 498 helped write sections of the manuscript. PR and EC coordinated the review, screened  
13  
14 499 citations and full-text articles, abstracted data, appraised quality, resolved discrepancies,  
15  
16 500 contacted authors, and edited the manuscript. CS provided methodological support and  
17  
18 501 screened citations and full-text articles and edited the manuscript. RK, ER, FY, JDS, KT, and  
19  
20 502 HM screened citations and full-text articles, abstracted data, and/or appraised quality. BH,  
21  
22 503 BRH and YF helped conceive the study and edited the manuscript. All authors read and  
23  
24 504 approved the final manuscript.

25  
26  
27  
28  
29 505 **ACKNOWLEDGEMENTS**

30  
31 506 We thank Dr. David Moher for providing his feedback on our protocol. We thank Dr. Laure  
32  
33 507 Perrier for conducting the literature searches, Becky Skidmore for peer-reviewing the  
34  
35 508 MEDLINE search, and Alissa Epworth for obtaining the full-text articles. We thank Alistair  
36  
37 509 Scott, Wing Hui, and Geetha Sanmugalingham for screening some of the citations and/or  
38  
39 510 abstracting some of the data for a few of the included studies, Misty Pratt and Mona  
40  
41 511 Ghannad for helping scan reference lists, and Ana Guzman, Susan Le, and Inthuja  
42  
43 512 Selvaratnam for contacting authors and formatting the manuscript.

44  
45  
46  
47  
48 513 **FUNDING**

49  
50 514 This systematic review was funded by the Canadian Institutes for Health Research/Drug  
51  
52 515 Safety and Effectiveness Network (CIHR/DSEN). AAV is funded by the Banting Postdoctoral  
53  
54 516 Fellowship Program from the CIHR. SES is funded by a Tier 1 Canada Research Chair in  
55  
56  
57  
58  
59  
60

1  
2  
3 517 Knowledge Translation. BH is funded by a CIHR/DSEN New Investigator Award in  
4  
5  
6 518 Knowledge Synthesis. BRH receives funding from the Alberta Heritage Foundation for  
7  
8 519 Medical Research. ACT is funded by a Tier 2 Canada Research Chair in Knowledge  
9  
10 520 Synthesis. The funder had no role in the design and conduct of the study; collection,  
11  
12 521 management, analysis, and interpretation of the data; preparation, review, or approval of  
13  
14 522 the manuscript; or decision to submit the manuscript for publication.  
15  
16

17  
18 523 **COMPETING INTERESTS**

19  
20 524 None declared.  
21

22 525 **ETHICS APPROVAL**

23  
24 526 Not applicable.  
25  
26

27 527 **PROVENANCE AND PEER REVIEW**

28  
29 528 Not commissioned; externally peer reviewed.  
30  
31

32 529 **DATA SHARING STATEMENT**

33  
34 530 All datasets generated and/or analysed during the current study are available from the  
35  
36 531 corresponding author on reasonable request.  
37  
38

39 532 **OPEN ACCESS**

40  
41 533 This is an Open Access article distributed in accordance with the Creative Commons  
42  
43 534 Attribution Non Commercial (CC BY-NC 4.0) license, which permits others to distribute,  
44  
45 535 remix, adapt, build upon this work non-commercially, and license their derivative works on  
46  
47 536 different terms, provided the original work is properly cited and the use is non-  
48  
49 537 commercial. See: <http://creativecommons.org/licenses/by-nc/4.0/>.  
50  
51  
52  
53  
54  
55  
56  
57  
58  
59  
60

## 538 REFERENCES

- 539 1. Spina E, Perugi G. Antiepileptic drugs: indications other than epilepsy. *Epileptic Disord.* 2004;6(2):57-75.
- 540 541 2. Harden CL, Pennell PB, Koppel BS, et al. Management issues for women with epilepsy--focus on pregnancy (an evidence-based review): III. vitamin K, folic acid, blood levels, and breast-feeding: report of the quality standards subcommittee and therapeutics and technology assessment subcommittee of the American Academy of Neurology and the American Epilepsy Society. *Epilepsia.* 2009;50(5):1247-55.
- 542 543 544 545 3. Samren EB, van Duijn CM, Koch S, et al. Maternal use of antiepileptic drugs and the risk of major congenital malformations: a joint European prospective study of human teratogenesis associated with maternal epilepsy. *Epilepsia.* 1997;38(9):981-90.
- 546 547 548 4. Meador K, Reynolds MW, Crean S, Fahrbach K, Probst C. Pregnancy outcomes in women with epilepsy: a systematic review and meta-analysis of published pregnancy registries and cohorts. *Epilepsy Res.* 2008;81(1):1-13.
- 549 550 551 552 5. Bromley R, Weston J, Adab N, et al. Treatment for epilepsy in pregnancy: neurodevelopmental outcomes in the child. *The Cochrane database of systematic reviews.* 2014(10):Cd010236.
- 553 554 555 6. Banach R, Boskovic R, Einarson T, Koren G. Long-term developmental outcome of children of women with epilepsy, unexposed or exposed prenatally to antiepileptic drugs: a meta-analysis of cohort studies. *Drug Saf.* 2010;33(1):73-9.
- 556 557 558 7. Meador KJ, Baker GA, Browning N, et al. Fetal antiepileptic drug exposure and cognitive outcomes at age 6 years (NEAD study): a prospective observational study. *Lancet Neurol.* 2013;12(3):244-52.
- 559 560 561 8. Christensen J, Gronborg TK, Sorensen MJ, et al. Prenatal valproate exposure and risk of autism spectrum disorders and childhood autism. *JAMA.* 2013;309(16):1696-703.
- 562 563 564 9. Wlodarczyk BJ, Palacios AM, George TM, Finnell RH. Antiepileptic drugs and pregnancy outcomes. *Am J Med Genet A.* 2012;158a(8):2071-90.
- 565 566 10. Velez-Ruiz NJ, Meador KJ. Neurodevelopmental effects of fetal antiepileptic drug exposure. *Drug Saf.* 2015;38(3):271-8.
- 567 568 569 11. Tricco AC, Cogo E, Angeliki VA, et al. Comparative safety of anti-epileptic drugs among infants and children exposed in utero or during breastfeeding: protocol for a systematic review and network meta-analysis. *Systematic reviews.* 2014;3:68.
- 570 571 572 12. Jansen JP, Trikalinos T, Cappelleri JC, et al. Indirect treatment comparison/network meta-analysis study questionnaire to assess relevance and credibility to inform health care decision making: an ISPOR-AMCP-NPC Good Practice Task Force report. *Value Health.* 2014;17(2):157-73.
- 573 574 575 13. Hutton B, Salanti G, Caldwell DM, et al. The PRISMA extension statement for reporting of systematic reviews incorporating network meta-analyses of health care interventions: checklist and explanations. *Ann Intern Med.* 2015;162(11):777-84.
- 576 577 578 14. Veroniki AA, Cogo E, Rios P, et al. Comparative safety of anti-epileptic drugs during pregnancy: a systematic review and network meta-analysis of congenital malformations and prenatal outcomes. *BMC Med.* 2017;15(1):95.
- 579 580 15. McGowan J, Sampson M, Salzwedel DM, Cogo E, Foerster V, Lefebvre C. PRESS Peer Review of Electronic Search Strategies: 2015 Guideline Statement. *J Clin Epidemiol.* 2016;75:40-6.
- 581 582 16. Wells G, Shea B, O'Connell D, et al. The Newcastle-Ottawa Scale (NOS) for assessing the quality of nonrandomised studies in meta-analyses2000. Available from: [http://www.ohri.ca/programs/clinical\\_epidemiology/oxford.asp](http://www.ohri.ca/programs/clinical_epidemiology/oxford.asp).
- 583

- 1  
2  
3 584 17. Chaimani A, Higgins JP, Mavridis D, Spyridonos P, Salanti G. Graphical tools for network  
4 585 meta-analysis in STATA. *PLoS One*. 2013;8(10):e76654.
- 5 586 18. Furukawa TA, Guyatt GH, Griffith LE. Can we individualize the 'number needed to treat'? An  
6 587 empirical study of summary effect measures in meta-analyses. *Int J Epidemiol*. 2002;31(1):72-6.
- 7 588 19. Lu G, Ades AE. Combination of direct and indirect evidence in mixed treatment  
8 589 comparisons. *Stat Med*. 2004;23(20):3105-24.
- 9 590 20. Jansen JP, Naci H. Is network meta-analysis as valid as standard pairwise meta-analysis? It  
10 591 all depends on the distribution of effect modifiers. *BMC Med*. 2013;11:159.
- 11 592 21. White IR, Barrett JK, Jackson D, Higgins JP. Consistency and inconsistency in network meta-  
12 593 analysis: model estimation using multivariate meta-regression. *Res Synth Methods*. 2012;3(2):111-  
13 594 25.
- 14 595 22. Song F, Altman DG, Glenny AM, Deeks JJ. Validity of indirect comparison for estimating  
15 596 efficacy of competing interventions: empirical evidence from published meta-analyses. *BMJ*.  
16 597 2003;326(7387):472.
- 17 598 23. Veroniki AA, Vasiliadis HS, Higgins JP, Salanti G. Evaluation of inconsistency in networks of  
18 599 interventions. *Int J Epidemiol*. 2013;42(1):332-45.
- 19 600 24. Welton NJ, Sutton AJ, Cooper N, Abrams KR, Ades A. Evidence synthesis for decision making  
20 601 in healthcare. New York: Wiley; 2012.
- 21 602 25. Spiegelhalter DJ, Best NG, Carlin BP, Van Der Linde A. Bayesian measures of model  
22 603 complexity and fit. *J R Stat Soc Ser B Stat Methodol*. 2002;64(4):583-639.
- 23 604 26. Lunn D, Spiegelhalter D, Thomas A, Best N. The BUGS project: Evolution, critique and future  
24 605 directions. *Stat Med*. 2009;28(25):3049-67.
- 25 606 27. Palmer T, Sterne J. Meta-Analysis in Stata: An Updated Collection from the Stata Journal.  
26 607 White I, editor. Texas: Stata Press; 2016.
- 27 608 28. Riley RD, Higgins JP, Deeks JJ. Interpretation of random effects meta-analyses. *BMJ*.  
28 609 2011;342:d549.
- 29 610 29. Higgins JP, Thompson SG, Spiegelhalter DJ. A re-evaluation of random-effects meta-analysis.  
30 611 *J R Stat Soc Ser A Stat Soc*. 2009;172(1):137-59.
- 31 612 30. Salanti G, Ades AE, Ioannidis JP. Graphical methods and numerical summaries for  
32 613 presenting results from multiple-treatment meta-analysis: an overview and tutorial. *J Clin*  
33 614 *Epidemiol*. 2011;64(2):163-71.
- 34 615 31. Trinquart L, Attiche N, Bafeta A, Porcher R, Ravaud P. Uncertainty in Treatment Rankings:  
35 616 Reanalysis of Network Meta-analyses of Randomized Trials. *Ann Intern Med*. 2016;164(10):666-73.
- 36 617 32. Bromley R, Baxter N, Calderbank R, Mawer G, Clayton-Smith J, Baker G. A comprehensive  
37 618 review of the language abilities of children exposed to valproate or carbamazepine in utero.  
38 619 American Epilepsy Society; Texas2010.
- 39 620 33. Gogatishvili N, Ediberidze T, Lomidze G, Tatishvili N, Kasradze S. PO-0834 Long-term  
40 621 Developmental Outcome Of Children Prenatally Exposed To Antiepileptic Drugs. *Arch Dis Child*.  
41 622 2014;99(Suppl 2):A526.
- 42 623 34. Gogatishvili N, Ediberidze T, Lomidze G, Tatishvili N, Kasradze S. Cognitive outcomes of  
43 624 children with fetal antiepileptic drug exposure at the age of 3-6 years-preliminary data. 1st  
44 625 Congress of the European Academy of Neurology; Berlin: European Journal of Neurology; 2015. p.  
45 626 329.
- 46 627 35. Miskov S, Juraski RG, Fucic A, et al. Croatian Pregnant Women with Epilepsy and Effects of  
47 628 Antiepileptic Drugs Exposure in their Offspring - seven years of prospective surveillance. American  
48 629 Epilepsy Society; Texas2010.
- 49 630 36. Adab N, Kini U, Vinten J, et al. The longer term outcome of children born to mothers with  
50 631 epilepsy. *J Neurol Neurosurg Psychiatry*. 2004;75(11):1575-83.

- 1  
2  
3 632 37. Dean JCS, Hailey H, Moore SJ, Lloyd DJ, Turnpenny PD, Little J. Long term health and  
4 633 neurodevelopment in children exposed to antiepileptic drugs before birth. *J Med Genet.*  
5 634 2002;39(4):251-9.  
6 635 38. Gaily E. Development and growth in children of epileptic mothers: a prospective controlled  
7 636 study. Helsinki, Finland: University of Helsinki; 1990.  
8 637 39. Katz JM, Pacia SV, Devinsky O. Current Management of Epilepsy and Pregnancy: Fetal  
9 638 Outcome, Congenital Malformations, and Developmental Delay. *Epilepsy Behav.* 2001;2(2):119-23.  
10 639 40. Veroniki AA, Straus SE, Fyraridis A, Tricco AC. The rank-heat plot is a novel way to present  
11 640 the results from a network meta-analysis including multiple outcomes. *J Clin Epidemiol.* 2016.  
12 641 41. Veiby G, Engelsen BA, Gilhus NE. Early child development and exposure to antiepileptic  
13 642 drugs prenatally and through breastfeeding: a prospective cohort study on children of women with  
14 643 epilepsy. *JAMA Neurol.* 2013;70(11):1367-74.  
15 644 42. Shallcross R, Bromley RL, Irwin B, Bonnett LJ, Morrow J, Baker GA. Child development  
16 645 following in utero exposure: levetiracetam vs sodium valproate. *Neurology.* 2011;76(4):383-9.  
17 646 43. Zaccara G, Giovannelli F, Giorgi FS, Franco V, Gasparini S, Benedetto U. Tolerability of new  
18 647 antiepileptic drugs: a network meta-analysis. *Eur J Clin Pharmacol.* 2017.  
19 648 44. Higgins JPT, Green S, editors. Cochrane Handbook for Systematic Reviews of Interventions.  
20 649 5.1.0 ed: The Cochrane Collaboration; 2009.  
21 650 45. Kibret T, Richer D, Beyene J. Bias in identification of the best treatment in a Bayesian  
22 651 network meta-analysis for binary outcome: a simulation study. *Clin Epidemiol.* 2014;6:451-60.  
23 652 46. Dalessio DJ. Seizure Disorders and Pregnancy. *N Engl J Med.* 1985;312(9):559-63.  
24 653 47. Efthimiou O, Mavridis D, Debray TP, et al. Combining randomized and non-randomized  
25 654 evidence in network meta-analysis. *Stat Med.* 2017.  
26 655 48. Schmitz S, Adams R, Walsh C. Incorporating data from various trial designs into a mixed  
27 656 treatment comparison model. *Stat Med.* 2013;32(17):2935-49.  
28 657 49. Cameron C, Fireman B, Hutton B, et al. Network meta-analysis incorporating randomized  
29 658 controlled trials and non-randomized comparative cohort studies for assessing the safety and  
30 659 effectiveness of medical treatments: challenges and opportunities. *Systematic reviews.* 2015;4:147.  
31 660 50. Easterbrook PJ, Berlin JA, Gopalan R, Matthews DR. Publication bias in clinical research.  
32 661 *Lancet.* 1991;337(8746):867-72.  
33 662 51. Veroniki AA, Straus SE, Soobiah C, Elliott MJ, Tricco AC. A scoping review of indirect  
34 663 comparison methods and applications using individual patient data. *BMC Med Res Methodol.*  
35 664 2016;16(1):47.  
36 665



666 **Table 1. Outcome measures and diagnostic scales used in analysis**

| <b>Cognitive developmental delay</b>                         |                                                                                                                        |
|--------------------------------------------------------------|------------------------------------------------------------------------------------------------------------------------|
| Bayley Scales of Infant Development (children $\leq$ 42 mo.) | Score $\geq$ 2 standard deviations below the mean                                                                      |
| Griffiths Scale of Infant Development (children >42 mo.)     | Score $\geq$ 2 standard deviations below the mean                                                                      |
| McCarthy Scales of Children's Abilities (children >30 mo.)   | Score $\geq$ 1 standard deviations below the mean                                                                      |
| Stanford-Binet IV Intelligence scale for children            | Intelligence quotient $\leq$ 80                                                                                        |
| Touwen's Test                                                | Above average number of items rated abnormal in one or more domains                                                    |
| Wechsler Scale of Preschool and Primary Intelligence         | Intelligence quotient <90                                                                                              |
| Wechsler Intelligence Scale for Children - III               | Intelligence quotient <80; verbal intelligence quotient <69                                                            |
| Developmental Assessment                                     | Confirmed diagnosis by developmental pediatrician or pediatric neurologist                                             |
| <b>Autism/dyspraxia</b>                                      |                                                                                                                        |
| Developmental Assessment                                     | Diagnosis confirmed by developmental specialists at 2 years of age                                                     |
| Medical Records                                              | Confirmed diagnosis recorded in medical history; registry records (ICD-10 codes F84.0, F84.1, F84.5, F84.8, and F84.9) |
| Modified checklist for autism in toddlers                    | Scored positive for $\geq$ 2 out of 6 critical items OR $\geq$ 3 any items of the total scale                          |
| <b>Psychomotor developmental delay</b>                       |                                                                                                                        |
| Ages and Stages Questionnaire                                | >3 standard deviations from the test mean                                                                              |
| Bayley Scales of Infant Development – Psychomotor Index      | >2 standard deviations below the standardized mean for the test                                                        |
| Touwen's Test                                                | Demonstrated dysfunctions in fine motor balance, fine motor functions, and coordination of extremities                 |
| Schedule of Growing Skills II                                | Scored as 'delayed' in $\geq$ 1 domain of the test                                                                     |

|                                                                                                                                                                                                                     |                                                                                                                                                                                                                            |
|---------------------------------------------------------------------------------------------------------------------------------------------------------------------------------------------------------------------|----------------------------------------------------------------------------------------------------------------------------------------------------------------------------------------------------------------------------|
| Developmental Assessment                                                                                                                                                                                            | Infant scored >2 negative items (administered by general practitioner or pediatrician); diagnosis of neuromotor deficit confirmed by a trained nurse practitioner; infant failing to sit by 10 months or walk by 18 months |
| Health/Medical Records                                                                                                                                                                                              | Diagnosis of psychomotor delay recorded in medical records                                                                                                                                                                 |
| <b>Language Delay</b>                                                                                                                                                                                               |                                                                                                                                                                                                                            |
| Ages and Stages Questionnaire                                                                                                                                                                                       | >3 standard deviations from the test mean                                                                                                                                                                                  |
| Clinical Evaluation of Language Fundamentals – 4 <sup>th</sup> Edition                                                                                                                                              | Score <70 in core language domain; score <84 overall                                                                                                                                                                       |
| Learning Accomplishment Profile                                                                                                                                                                                     | Below average performance in expressive speech (adjusted for age)                                                                                                                                                          |
| Comprehensive Language Assessment (Peabody Picture Vocabulary Test; Receptive Expressive Emergent Language Scale; Expressive One Word Picture Vocabulary Test, or Sequenced Inventory of Communication Development) | Scores/assessment indicate a >6 moth delay in age appropriate language development                                                                                                                                         |
| <b>ADHD</b>                                                                                                                                                                                                         |                                                                                                                                                                                                                            |
| Attention Problems and Hyperactivity Scales                                                                                                                                                                         | Score >1 standard deviations from the test mean                                                                                                                                                                            |
| Child Behaviour Checklist                                                                                                                                                                                           | ≥6 positive items on checklist                                                                                                                                                                                             |
| Diagnostic and Statistical Manual – IV                                                                                                                                                                              | ≥5 positive items on checklist                                                                                                                                                                                             |
| Medical Records                                                                                                                                                                                                     | Confirmed diagnosis in hospital/medical records made by a pediatrician or child psychiatrist                                                                                                                               |
| <b>Neonatal Seizure</b>                                                                                                                                                                                             |                                                                                                                                                                                                                            |
| Medical records                                                                                                                                                                                                     | Record of seizures during 1 <sup>st</sup> year; confirmation of neonatal seizure by electroencephalography or diagnosis                                                                                                    |
| <b>Social Impairment</b>                                                                                                                                                                                            |                                                                                                                                                                                                                            |
| Developmental Assessment (Ages and Stages Questionnaire [6 and 18 months]; Child Behaviour Checklist [36 months])                                                                                                   | Scores dichotomized into 'normal' or 'adverse' range based on pre-defined values used by scale, for scales without pre-defined values cut-off was set at a score >2 standard deviations outside the test mean              |

667

668 **Table 2. Summary characteristics of included studies**

| Study/Patient Characteristic                   | # of Studies<br>(n=29) | % of Studies |
|------------------------------------------------|------------------------|--------------|
| <i>Year of publication</i>                     |                        |              |
| 1980-1989                                      | 1                      | 3.45         |
| 1990-1999                                      | 6                      | 20.69        |
| 2000-2009                                      | 5                      | 17.24        |
| 2010-2015                                      | 17                     | 58.62        |
| <i>Continent (of country of study conduct)</i> |                        |              |
| Europe                                         | 20                     | 68.97        |
| North America                                  | 5                      | 17.24        |
| Asia                                           | 1                      | 3.45         |
| Australia                                      | 2                      | 6.90         |
| Trans-Continental                              | 1                      | 3.45         |
| <i>Study design</i>                            |                        |              |
| Observational cohort                           | 29                     | 100.00       |
| Case-control                                   | 0                      | 0.00         |
| Randomized clinical trial                      | 0                      | 0.00         |
| <i>Registry study</i>                          |                        |              |
| Yes                                            | 11                     | 37.93        |
| No                                             | 18                     | 62.07        |
| <i>Sample size</i>                             |                        |              |
| 0-99                                           | 18                     | 62.07        |
| 100-299                                        | 9                      | 31.03        |
| 300-499                                        | 1                      | 3.45         |
| 500-699                                        | 0                      | 0.00         |
| 700-999                                        | 0                      | 0.00         |
| 1000+                                          | 1                      | 3.45         |
| <i>Number of interventions</i>                 |                        |              |
| 2                                              | 4                      | 13.79        |
| 3                                              | 5                      | 17.24        |
| 4                                              | 8                      | 27.59        |
| 5-7                                            | 8                      | 27.59        |
| 8-10                                           | 2                      | 6.90         |
| 11+                                            | 2                      | 6.90         |
| <i>Outcomes*, †</i>                            |                        |              |
| Cognitive Developmental Delay                  | 12                     | 58.62        |
| Autism/Dyspraxia                               | 5                      | 17.24        |
| Language Delay                                 | 5                      | 17.24        |
| ADHD                                           | 5                      | 17.24        |
| Psychomotor Developmental Delay                | 11                     | 37.93        |

| Study/Patient Characteristic                 | # of Studies<br>(n=29) | % of Studies |
|----------------------------------------------|------------------------|--------------|
| Neonatal Seizures                            | 2                      | 6.90         |
| Social Impairment                            | 1                      | 3.45         |
| <i>Funding</i>                               |                        |              |
| Public                                       | 15                     | 51.72        |
| Private                                      | 0                      | 0.00         |
| Mixed public and private                     | 4                      | 13.79        |
| NR/Unclear                                   | 10                     | 34.48        |
| <i>Treatment indication</i>                  |                        |              |
| Epilepsy                                     | 23                     | 79.31        |
| Mixed indications <sup>‡</sup>               | 0                      | 0.00         |
| Not reported                                 | 6                      | 20.69        |
| <i>Epileptic control group<sup>§</sup></i>   |                        |              |
| Yes                                          | 15                     | 51.72        |
| No/NR/NA                                     | 14                     | 48.28        |
| <i>Mean maternal age</i>                     |                        |              |
| 24-26 y                                      | 2                      | 6.90         |
| 27-29 y                                      | 5                      | 17.24        |
| 30+ y                                        | 4                      | 13.79        |
| Not reported                                 | 18                     | 62.07        |
| <i>AED exposure during pregnancy</i>         |                        |              |
| Reported as during 1 <sup>st</sup> trimester | 5                      | 17.24        |
| Reported as any time during pregnancy        | 4                      | 13.79        |
| During pregnancy and breastfeeding           | 5                      | 17.24        |
| Not reported                                 | 15                     | 51.72        |
| <i>Alcohol use during pregnancy</i>          |                        |              |
| Yes                                          | 5                      | 17.24        |
| NR                                           | 24                     | 82.76        |
| <i>Tobacco use during pregnancy</i>          |                        |              |
| Yes                                          | 7                      | 24.14        |
| NR                                           | 22                     | 75.86        |

**Abbreviations:** ADHD - Attention Deficit Hyperactivity Disorder; AED - anti-epileptic drug(s); NA - Not applicable; NR - Not reported

\* Values in this category do not match totals as some studies report more than one outcome

<sup>†</sup> Percentage of total number of included studies (n=29)

<sup>‡</sup> Includes individuals taking AEDs for psychiatric disorders, migraine, and neuropathic/neurological pain

<sup>§</sup> Consisted of women with Epilepsy who did not take AEDs during pregnancy

669

1  
2  
3  
4  
5  
6  
7  
8  
9  
10  
11  
12  
13  
14  
15  
16  
17  
18  
19  
20  
21  
22  
23  
24  
25  
26  
27  
28  
29  
30  
31  
32  
33  
34  
35  
36  
37  
38  
39  
40  
41  
42  
43  
44  
45  
46  
47  
48  
49  
50  
51  
52  
53  
54  
55  
56  
57  
58  
59  
60



\*29 publications reporting 30 included studies.

TITLE: Study flow diagram  
254x190mm (300 x 300 DPI)

ew only

1  
2  
3  
4  
5  
6  
7  
8  
9  
10  
11  
12  
13  
14  
15  
16  
17  
18  
19  
20  
21  
22  
23  
24  
25  
26  
27  
28  
29  
30  
31  
32  
33  
34  
35  
36  
37  
38  
39  
40  
41  
42  
43  
44  
45  
46  
47  
48  
49  
50  
51  
52  
53  
54  
55  
56  
57  
58  
59  
60



TITLE: Forest plots for cognitive developmental delay, autism/dyspraxia, psychomotor developmental delay, language delay, and attention deficit hyperactivity disorder outcome

533x400mm (300 x 300 DPI)

1  
2  
3  
4  
5  
6  
7  
8  
9  
10  
11  
12  
13  
14  
15  
16  
17  
18  
19  
20  
21  
22  
23  
24  
25  
26  
27  
28  
29  
30  
31  
32  
33  
34  
35  
36  
37  
38  
39  
40  
41  
42  
43  
44  
45  
46  
47  
48  
49  
50  
51  
52  
53  
54  
55  
56  
57  
58  
59  
60

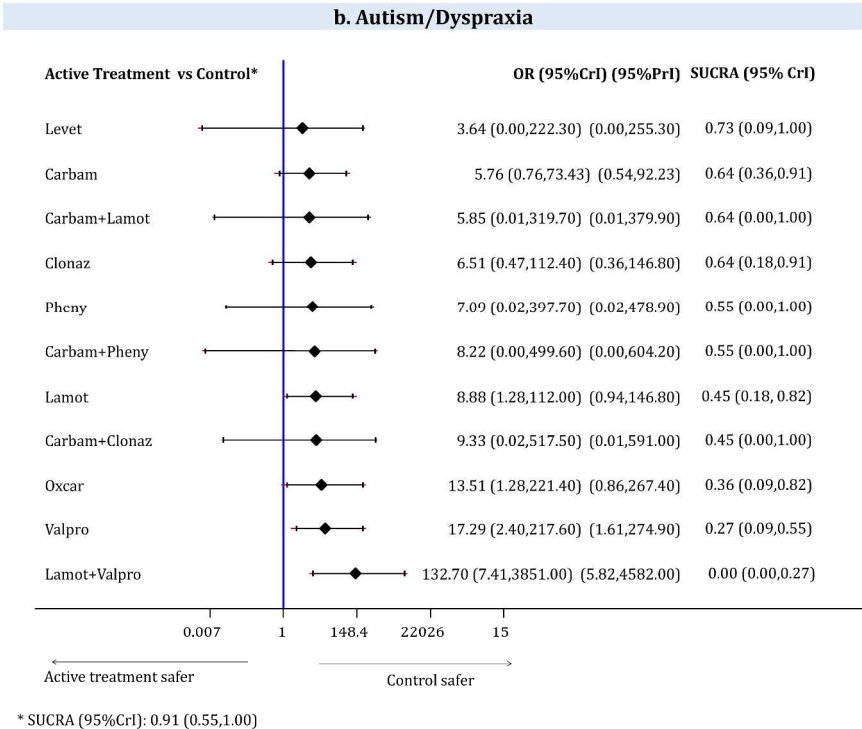

TITLE: Forest plots for cognitive developmental delay, autism/dyspraxia, psychomotor developmental delay, language delay, and attention deficit hyperactivity disorder outcome

533x400mm (300 x 300 DPI)

1  
2  
3  
4  
5  
6  
7  
8  
9  
10  
11  
12  
13  
14  
15  
16  
17  
18  
19  
20  
21  
22  
23  
24  
25  
26  
27  
28  
29  
30  
31  
32  
33  
34  
35  
36  
37  
38  
39  
40  
41  
42  
43  
44  
45  
46  
47  
48  
49  
50  
51  
52  
53  
54  
55  
56  
57  
58  
59  
60

**c. Psychomotor developmental delay**

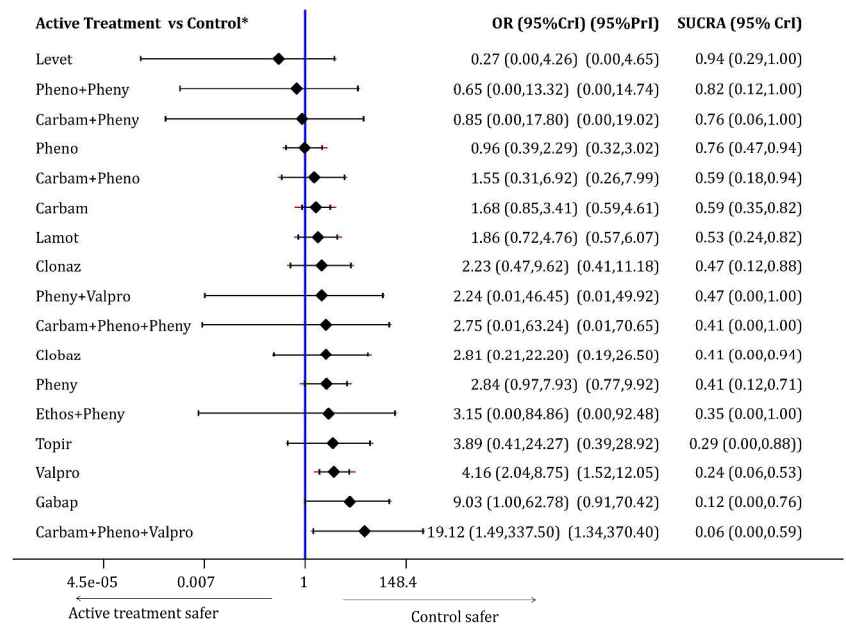

\* SUCRA (95%CrI): 0.76 (0.53,0.94)

TITLE: Forest plots for cognitive developmental delay, autism/dyspraxia, psychomotor developmental delay, language delay, and attention deficit hyperactivity disorder outcome

533x400mm (300 x 300 DPI)



1  
2  
3  
4  
5  
6  
7  
8  
9  
10  
11  
12  
13  
14  
15  
16  
17  
18  
19  
20  
21  
22  
23  
24  
25  
26  
27  
28  
29  
30  
31  
32  
33  
34  
35  
36  
37  
38  
39  
40  
41  
42  
43  
44  
45  
46  
47  
48  
49  
50  
51  
52  
53  
54  
55  
56  
57  
58  
59  
60



TITLE: Forest plots for cognitive developmental delay, autism/dyspraxia, psychomotor developmental delay, language delay, and attention deficit hyperactivity disorder outcome

533x400mm (300 x 300 DPI)

Peer Review Only

1  
2  
3  
4  
5  
6  
7  
8  
9  
10  
11  
12  
13  
14  
15  
16  
17  
18  
19  
20  
21  
22  
23  
24  
25  
26  
27  
28  
29  
30  
31  
32  
33  
34  
35  
36  
37  
38  
39  
40  
41  
42  
43  
44  
45  
46  
47  
48  
49  
50  
51  
52  
53  
54  
55  
56  
57  
58  
59  
60



TITLE: Forest plots for cognitive developmental delay, autism/dyspraxia, psychomotor developmental delay, language delay, and attention deficit hyperactivity disorder outcome

533x400mm (300 x 300 DPI)



TITLE: Network diagrams for cognitive developmental delay, autism/dyspraxia, psychomotor developmental delay, language delay, and attention deficit hyperactivity disorder outcomes.

CAPTION: Each treatment node is weighted according to the number of patients that have received the particular treatment, and each edge is weighted according to the number of studies comparing the treatments it connects.

Abbreviations: carbam - carbamazepine, clobaz - clobazam, clonaz - clonazepam, ethos - ethosuximide, gabap - gabapentin, lamot - lamotrigine, levet - levetiracetam, oxcar - oxcarbazepine, pheno - phenobarbital, pheny - phenytoin, primid - primidone, topir - topiramate, valpro - valproate, vigab - vigabatrin

254x190mm (300 x 300 DPI)



## PROTOCOL

## Open Access

# Comparative safety of anti-epileptic drugs among infants and children exposed *in utero* or during breastfeeding: protocol for a systematic review and network meta-analysis

Andrea C Tricco<sup>1</sup>, Elise Cogo<sup>1</sup>, Veroniki A Angeliki<sup>1</sup>, Charlene Soobiah<sup>1,2</sup>, Brian Hutton<sup>3</sup>, Brenda R Hemmelgarn<sup>4</sup>, David Moher<sup>3</sup>, Yaron Finkelstein<sup>5,6,7</sup> and Sharon E Straus<sup>1,8\*</sup>

## Abstract

**Background:** Epilepsy affects about 1% of the general population. Anti-epileptic drugs (AEDs) prevent or terminate seizures in individuals with epilepsy. Pregnant women with epilepsy may continue taking AEDs. Many of these agents cross the placenta and increase the risk of major congenital malformations, early cognitive and developmental delays, and infant mortality. We aim to evaluate the comparative safety of AEDs approved for chronic use in Canada when administered to pregnant and breastfeeding women and the effects on their infants and children through a systematic review and network meta-analysis.

**Methods:** Studies examining the effects of AEDs administered to pregnant and breastfeeding women regardless of indication (e.g., epilepsy, migraine, pain, psychiatric disorders) on their infants and children will be included. We will include randomized clinical trials (RCTs), quasi-RCTs, non-RCTs, controlled before-after, interrupted time series, cohort, registry, and case-control studies. The main literature search will be executed in MEDLINE, EMBASE, and the Cochrane Central Register of Controlled Trials. We will seek unpublished literature through searches of trial protocol registries and conference abstracts. The literature search results screening, data abstraction, and risk of bias appraisal will be performed by two individuals, independently. Conflicts will be resolved through discussion. The risk of bias of experimental and quasi-experimental studies will be appraised using the Cochrane Effective Practice and Organization of Care Risk-of-Bias tool, methodological quality of observational studies will be appraised using the Newcastle-Ottawa Scale, and quality of reporting of safety outcomes will be conducted using the McMaster Quality Assessment Scale of Harms (McHarm) tool. If feasible and appropriate, we will conduct random effects meta-analysis. Network meta-analysis will be considered for outcomes that fulfill network meta-analysis assumptions.

The primary outcome is major congenital malformations (overall and by specific types), while secondary outcomes include fetal loss/miscarriage, minor congenital malformations (overall and by specific types), cognitive development, psychomotor development, small for gestational age, preterm delivery, and neonatal seizures.

(Continued on next page)

\* Correspondence: [sharon.straus@utoronto.ca](mailto:sharon.straus@utoronto.ca)

<sup>1</sup>Li Ka Shing Knowledge Institute, St. Michael's Hospital, 209 Victoria Street, East Building, Toronto, Ontario M5B 1 T8, Canada

<sup>8</sup>Department of Geriatric Medicine, University of Toronto, 172 St. George Street, Toronto, Ontario M5R 0A3, Canada

Full list of author information is available at the end of the article

(Continued from previous page)

**Discussion:** Our systematic review will address safety concerns regarding the use of AEDs during pregnancy and breastfeeding. Our results will be useful to healthcare providers, policy-makers, and women of childbearing age who are taking anti-epileptic medications.

**Systematic review registration:** PROSPERO CRD42014008925.

**Keywords:** Anti-epileptic drug, Breastfeeding, Comparative safety, Congenital malformation, Epilepsy, Fetus, Infant, Network meta-analysis, Pregnancy, Systematic review

## Background

Epilepsy is the most common chronic neurological condition, affecting 0.6 to 1% of the population [1,2]. Individuals with uncontrolled epilepsy experience recurrent seizures, which can have psychosocial and physical consequences, including a compromised life expectancy [3,4]. The goal of anti-epileptic treatment is to improve quality of life and health outcomes by reducing the frequency of seizures [4].

Anti-epileptic medications decrease seizures by reducing excitation and enhancing inhibition of neurons [5-7]. Many of these medications target different channels, including calcium, sodium, and glutamate, and are broadly classified as first generation agents (e.g., phenobarbitone, phenytoin, carbamazepine, sodium valproate, ethosuximide) and second generation agents (e.g., lamotrigine, levetiracetam, topiramate, gabapentin, vigabatrin, oxcarbazepine, clobazam, clonazepam, zonisamide, lacosamide, rufinamide, primidone) [8]. Due to the broad and varied mechanisms of action, the indications for some of these medications also include pain syndromes, psychiatric disorders, and migraine headaches [8].

Many clinical practice guidelines recommend that women of childbearing age continue to take their anti-epileptic medications; however, medications with lower risk of teratogenic events are advised [9,10] since anti-epileptic drugs (AEDs) cross the placenta or transfer through breast milk, posing risks to the fetus and infant [9,11,12].

Some AEDs have been associated with increased risk of harm to the fetus and infants. For example, exposure to valproate has led to increased risk of major congenital malformations [10], cognitive delay, and minor congenital abnormalities [13-16]. Phenobarbital has been associated with minor congenital abnormalities and developmental delay [17,18]. Carbamazepine and lamotrigine have been associated with minor congenital abnormalities [19-22]. However, other than studies of the use of valproate, many studies have produced inconsistent findings regarding harm to the fetus and infant with use of other agents [23]. As such, our objective is to evaluate the comparative safety of AEDs for infants and children who were exposed *in utero* or during breastfeeding through a systematic review and network meta-analysis.

## Methods/Design

### Protocol

A systematic review protocol was developed and registered with the PROSPERO database (CRD42014008925, available at: [http://www.crd.york.ac.uk/PROSPERO/display\\_record.asp?ID=CRD42014008925](http://www.crd.york.ac.uk/PROSPERO/display_record.asp?ID=CRD42014008925)). It was revised with feedback from the decision-makers who posed the query within Health Canada, healthcare practitioners, content experts, and research methodologists. The reporting of our systematic review protocol was guided by the Preferred Reporting Items for Systematic Reviews and Meta-analyses Protocols [24].

### Eligibility criteria

We will include studies examining the effects of AEDs on infants and children who were exposed *in utero* or during breastfeeding. We will include experimental studies (randomized clinical trials [RCTs], quasi-RCTs, non-RCTs), quasi-experimental studies (controlled before and after studies, interrupted time series), and observational studies (cohort, case-control, registry studies) of pregnant women at any stage of pregnancy and breastfeeding women and their infants/children. The rationale for including other study designs in addition to RCTs is that there are ethical issues in conducting RCTs of AEDs in pregnancy, so RCT evidence might not exist for some or all of these drugs. Given that our review includes rare outcomes, including observational evidence is crucial. In contrast to efficacy evaluation, safety assessment usually requires very large sample sizes to be able to detect adverse events. Therefore, while RCTs have lower risk of bias, they usually do not have the statistical power needed to adequately evaluate uncommon/rare safety outcomes due to Type II (i.e., false negative) error [25]. Given that our review includes rare outcomes, including observational evidence is crucial [26]. Additionally, observational studies can often provide more generalizable evidence due to the strict participant inclusion criteria in most RCTs [27]. Real-world safety evidence that has external validity is important for the assessment of the possible risks of AEDs in pregnant and breastfeeding women.

The diagnosis of neurodevelopmental delay related to *in utero* exposure is made before adolescence, and

1  
2  
3  
4  
5 hence, we will limit inclusion to children up to 12 years  
6 of age. AEDs that are approved for chronic use in Canada  
7 will be included. Drugs that are only used acutely or those  
8 that are not currently approved for use in Canada will be  
9 excluded, as the focus of this review is on the Canadian  
10 setting [28-32]. However, most of the medications we  
11 will examine are available in other countries as well.  
12 The relevant 16 medications and their synonyms are  
13 listed in Additional file 1, and the excluded drugs are  
14 listed in Additional file 2. Studies of all combinations  
15 and doses of these medications are eligible for inclusion.  
16 Since we are only interested in exposures that occur *in*  
17 *utero* or during breastfeeding, studies examining AEDs  
18 administered directly to infants or children will be  
19 excluded. All indications for AEDs will be included such  
20 as epilepsy, migraine, pain, and psychiatric disorders.

21 In order to be included, studies must compare an anti-  
22 epileptic medication against another included anti-epileptic  
23 medication, placebo, a 'no intervention' control group, or  
24 combinations of two or more anti-epileptic medications.  
25 Only studies providing results for our outcomes of interest  
26 will be included. Our primary outcome is major congenital  
27 malformations (overall and by specific type, such as  
28 craniofacial defects and neural tube defects). Secondary  
29 outcomes include minor congenital malformations (over-  
30 all and by specific type, such as epicanthal folds and  
31 microstomia), cognition (e.g., global cognitive functioning  
32 and specific cognitive domains such as attention), psycho-  
33 motor development (e.g., autism, dyspraxia), small for ges-  
34 tational age, preterm delivery, neonatal seizures, and fetal  
35 loss/miscarriage. No other limitations will be imposed on  
36 the eligibility criteria, including published/unpublished  
37 material, language of dissemination, duration of follow-up,  
38 or year of publication. The draft eligibility criteria can be  
39 found in Additional file 3.

#### 41 Information sources and literature search

42 Our main literature search will be executed in the MED-  
43 LINE database. The search terms were drafted by an experi-  
44 enced librarian and can be found in Additional file 4. The  
45 search was peer reviewed by another librarian using the  
46 Peer Review of Electronic Search Strategies checklist [33].

47 In addition to MEDLINE, we will also search the  
48 EMBASE and the Cochrane Central Register of Con-  
49 trolled Trials databases. We will follow the MEDLINE  
50 search strategy for these databases, and the search  
51 terms will be adjusted accordingly. The electronic  
52 database search will be supplemented by searching for  
53 unpublished literature [34]. This will be accomplished  
54 through exploring conference abstracts, clinical trial  
55 registries, and contacting manufacturers of AEDs. We  
56 will also scan the reference lists of included studies  
57 and previous reviews in the area [23,35,36].

#### Study selection process

The eligibility criteria screening form will be pilot-tested  
by the team and is presented in Additional file 3. We  
will calculate inter-rater reliability from the pilot-test  
and screening will only commence after high agreement  
(e.g., kappa statistic  $\geq 60\%$ ) is observed [37]. Subsequently,  
two reviewers will screen each title/abstract and poten-  
tially relevant full-text articles from the literature search  
results, independently. Conflicts will be resolved through  
discussion. All screening will occur using our online  
screening software (synthesi.SR) [38].

#### Data items and data collection process

We will abstract data on the PICOS elements [39], in-  
cluding patient characteristics (e.g., age of the mother  
and infant/child, indication for anti-epileptic treatment,  
co-morbidities, concomitant medications), intervention  
details (e.g., type of anti-epileptic treatment, dose, route  
of administration, duration of treatment, timing [trimes-  
ter] of treatment during pregnancy), comparator details  
(e.g., comparator agent, dose, route of administration),  
outcome results (e.g., major congenital abnormality, minor  
congenital abnormality, cognitive function, psychomotor  
development) at the longest duration of follow-up, and  
study characteristics (e.g., study design, country of con-  
duct, year of conduct, sample size, setting). These charac-  
teristics will be abstracted using a data abstraction form  
created in Excel with an accompanying "cheat sheet" that  
will guide the reviewers with this process. The data ab-  
straction form and cheat sheet will be pilot-tested and  
data abstraction will only commence when high agree-  
ment (e.g., kappa statistic  $\geq 60\%$ ) [37] is observed. Each  
included study will be abstracted by two team members,  
independently, who will resolve disagreements through  
discussion.

#### Methodological quality/risk of bias appraisal

We will use various tools to assess the methodological  
quality/risk of bias of each of the studies that fulfill our  
eligibility criteria. This will be conducted by two reviewers,  
independently, and conflicts will be resolved through dis-  
cussion. First, we will appraise the risk of bias of experi-  
mental and quasi-experimental studies using the Cochrane  
Effective Practice and Organization of Care Risk-of-Bias  
tool [40]. Second, we will assess the methodological quality  
of observational studies using the Newcastle-Ottawa Scale  
[41]. Third, the quality of reporting of harms will be  
appraised using the McMaster Quality Assessment Scale  
of Harms (McHarm) tool [42].

#### Synthesis of included studies

A narrative summary of study results will be presented  
along with evidence summary tables. When sufficient  
data are available, we will conduct random effects meta-

1  
2  
3  
4  
5  
6  
7  
8  
9  
10  
11  
12  
13  
14  
15  
16  
17  
18  
19  
20  
21  
22  
23  
24  
25  
26  
27  
28  
29  
30  
31  
32  
33  
34  
35  
36  
37  
38  
39  
analysis to calculate pooled odds ratios for dichotomous data and pooled mean differences for continuous data [43,44]. Direct (pairwise) meta-analysis will be performed with RCTs alone in order to examine whether the data are consistent between direct and indirect evidence. If the large majority of included studies are observational, we will also conduct additional meta-analyses including observational studies alone. Analyses will be stratified by treatment indication (e.g., epilepsy, pain, etc.) to reduce clinical heterogeneity between different study populations whenever possible; for example, epilepsy itself in pregnant women is related to an increased baseline risk of certain neonatal adverse outcomes. Statistical, clinical, and methodological heterogeneity will be examined prior to conducting the meta-analysis. Funnel plots will be drawn for outcomes including at least 10 studies to explore asymmetry that might be explained by clinical, statistical, and methodological heterogeneity. The proportion of statistical heterogeneity will be examined using the  $I^2$  measure [45] and the magnitude of statistical heterogeneity will be calculated using the restricted maximum likelihood [46]. Meta-regression will be conducted for clinically relevant subgroups or when extensive statistical heterogeneity is observed (e.g.,  $I^2 \geq 75\%$ ) [47]. This will allow the examination of the impact of important factors on our results, such as maternal age, dose, duration and timing (e.g., trimester) of anti-epileptic treatment, co-morbidities, concomitant medications, risk of bias results, and sample size (due to Type II statistical power errors with rare adverse events). To ensure the meta-regression analysis is intuitive, the number of covariates examined will be less than 10% of the number of studies included in the meta-analysis for the particular outcome.

40  
41  
42  
43  
44  
45  
46  
47  
48  
49  
50  
51  
52  
53  
We anticipate that many of these outcomes will be rare. To deal with studies reporting zero events in one treatment arm, 0.5 will be added to the numerator and 1 will be added to the denominator. We will exclude studies reporting zero events in all treatment arms for a particular outcome [48,49]. We also anticipate that we will encounter missing data in the included studies. We will contact the study authors for this data and if we are unable to receive the data, we will impute missing data (e.g., measures of variance) using established methods [50]. To ensure that our imputations do not bias our results, we will conduct a sensitivity analysis [51]. The meta-analysis and meta-regression will be analyzed in R using the *metafor* command [52].

54  
55  
56  
57  
58  
59  
60  
A random-effects network meta-analysis will be conducted to make inferences regarding the comparative safety of the various AEDs [15], as well as rank their safety using rankograms and the surface under the cumulative ranking curve [53]. We will ensure the following factors are present prior to conducting network meta-analysis:

i) transitivity (i.e., comparable distribution of effect modifiers across comparisons), which will be examined using boxplots or percentages to visually inspect potential effect modifiers of treatment effect [54]; ii) consistency between direct and indirect data, which will be examined locally (i.e., in certain paths of the network) using the loop-specific method [55,56] and the node-splitting method [57], and globally (i.e., evaluating the network as a whole), using the design-by-treatment interaction model [58]; and iii) we will quantify the amount of variability attributed to heterogeneity and inconsistency rather than sampling error, by calculating the  $I^2$  [59]. We will estimate the amount of heterogeneity using the restricted maximum likelihood method and assuming common within-network heterogeneity. We will compare the magnitude of heterogeneity between consistency and inconsistency models, as well as between meta-regression and network meta-analysis models to determine how much heterogeneity will be explained by inconsistency or the explanatory variable, respectively. We will first use the design-by-treatment model for the evaluation of inconsistency in a network as a whole and then, if inconsistency is detected, we will employ the loop-specific and node-splitting methods to identify which piece of evidence is responsible for inconsistency. As mentioned above, analyses will be stratified by treatment indication when clinically appropriate. Important heterogeneity and inconsistency will be explored using network meta-regression using the same methods as described above, as necessary.

Prior to conducting the network meta-analysis, we will hold a team meeting to finalize which treatment nodes will be included in the analysis since we are unclear about the indications, dosages, patient populations, and outcomes reported in all of the studies. We will discuss issues, including conducting a class versus independent drug analysis, inclusion of drug routes of administration and dosages, as well as timing of drug administration. These decisions will be examined through a sensitivity analysis in which we will classify treatment nodes using a different classification to see how stable our results are. The network meta-analysis results will be presented as summary treatment effects for each pair of treatments. Network meta-analysis will be conducted in Stata with the *mvmeta* routine [60].

A sequential approach will be used for the network meta-analysis. We will first restrict our analysis to RCTs, which will be the primary analysis of interest. We will then include data from quasi-experimental studies, and finally, data from observational studies. This will provide an understanding of the contribution of each type of study design to our summary estimates, providing us with information on how these agents work above and beyond clinical trials.

## Discussion

Epilepsy is the most common chronic neurological condition, affecting 0.6 to 1% of the population [1,2]. Given that approximately a third of patients receiving AEDs are of reproductive age and almost half of pregnancies are unplanned [61], the fetus may be exposed to these in the first trimester of pregnancy, including during the critical stage of embryogenesis [62].

The comparative safety of these agents is currently unknown and our results will be important for policy-makers, healthcare providers, and women of childbearing age. To ensure our results have wide dissemination and uptake, we will publish our results in open access journals, present our findings at scientific conferences, conduct dissemination meetings with key stakeholders (including policy-makers and healthcare providers), and produce policy briefs for Health Canada, the organization that posed this query.

## Additional files

**Additional file 1:** List of relevant medications.

**Additional file 2:** Excluded drugs.

**Additional file 3:** Draft eligibility criteria.

**Additional file 4:** MEDLINE literature search.

## Abbreviations

AEDs: Anti-epileptic drugs; RCTs: Randomized clinical trials.

## Competing interests

The authors declare that they have no competing interests.

## Authors' contributions

ACT conceived and designed the study, helped obtain funding for the study, and helped write the draft protocol. EC registered the protocol with the PROSPERO database and edited the draft protocol. AV helped write the draft protocol. CS edited the draft protocol. BH, BRH, DM, and YF provided input into the design, helped obtain funding for the study, and edited the draft protocol. SES conceived the study, designed the study, obtained the funding, and helped write the draft protocol. All authors read and approved the final protocol.

## Acknowledgements

This systematic review was funded by the Canadian Institutes of Health Research/Drug Safety and Effectiveness Network (CIHR/DSEN). ACT and BH are funded by a CIHR/DSEN New Investigator Award in Knowledge Synthesis. BRH receives funding from the Alberta Heritage Foundation for Medical Research. DM is funded by a University of Ottawa Research Chair. SES is funded by a Tier 1 Canada Research Chair in Knowledge Translation. We thank Laure Perrier for conducting the literature searches and Becky Skidmore for peer reviewing the MEDLINE search strategy. We also thank Dr. Joseph Beyene for providing feedback on our original proposal and Wing Hui and Judy Tran for formatting the paper.

## Author details

<sup>1</sup>Li Ka Shing Knowledge Institute, St. Michael's Hospital, 209 Victoria Street, East Building, Toronto, Ontario M5B 1 T8, Canada. <sup>2</sup>Institute of Health Policy Management and Evaluation, University of Toronto, Health Sciences Building, 155 College Street, Suite 425, Toronto, Ontario M5T 3 M6, Canada. <sup>3</sup>Clinical Epidemiology Program, Centre for Practice-Changing Research, Ottawa Hospital Research Institute, The Ottawa Hospital – General Campus and University of Ottawa, 501 Smyth Road, Box 711, Ottawa, Ontario K1H 8 L6, Canada. <sup>4</sup>Departments of Medicine and Community Health Sciences,

University of Calgary, TRW Building, 3rd Floor, 3280 Hospital Drive NW, Calgary, Alberta T2N 4Z6, Canada. <sup>5</sup>The Hospital for Sick Children, 555 University Avenue, Toronto, Ontario M5G 1X8, Canada. <sup>6</sup>Department of Pediatrics, University of Toronto, 172 St. George Street, Toronto, Ontario M5R 0A3, Canada. <sup>7</sup>Department of Pharmacology and Toxicology, University of Toronto, Medical Sciences Building, 1 King's College Circle, Room 4207, Toronto, Ontario M5S 1A8, Canada. <sup>8</sup>Department of Geriatric Medicine, University of Toronto, 172 St. George Street, Toronto, Ontario M5R 0A3, Canada.

Received: 9 April 2014 Accepted: 17 June 2014

Published: 25 June 2014

## References

- Hauser WA, Hesdorffer D: *Epilepsy, Frequency, Causes and Consequences*. New York: Demos Publications; 1990.
- Wiebe S, Bellhouse DR, Fallahay C, Eliasziw M: **Burden of epilepsy: the Ontario Health Survey**. *Can J Neurol Sci* 1999, **26**(4):263–270.
- Sperling MR: **The consequences of uncontrolled epilepsy**. *CNS Spectr* 2004, **9**(2):98–101. 106–109.
- Jones MW: **Consequences of epilepsy: why do we treat seizures?** *Can J Neurol Sci* 1998, **25**(4):S24–S26.
- Dickenson AH, Ghandehari J: **Anti-convulsants and anti-depressants**. *Handb Exp Pharmacol* 2007, **177**:145–177.
- Stefani A, Spadoni F, Bernardi G: **Voltage-activated calcium channels: targets of antiepileptic drug therapy?** *Epilepsia* 1997, **38**(9):959–965.
- Snutch TP, Reiner PB: **Ca<sup>2+</sup> channels: diversity of form and function**. *Curr Opin Neurobiol* 1992, **2**(3):247–253.
- Spina E, Perugi G: **Antiepileptic drugs: indications other than epilepsy**. *Epileptic Disord* 2004, **6**(2):57–75.
- Harden CL, Pennell PB, Koppel BS, Hovinga CA, Gidal B, Meador KJ, Hopp J, Ting TY, Hauser WA, Thurman D, Kaplan PW, Robinson JN, French JA, Wiebe S, Wilner AN, Vazquez B, Holmes L, Krumholz A, Finnell R, Shafer PO, Le Guen CL, American Academy of Neurology; American Epilepsy Society: **Management issues for women with epilepsy–focus on pregnancy (an evidence-based review): III. Vitamin K, folic acid, blood levels, and breast-feeding: report of the quality standards subcommittee and therapeutics and technology assessment subcommittee of the American Academy of Neurology and the American Epilepsy Society**. *Epilepsia* 2009, **50**(5):1247–1255.
- Harden CL, Meador KJ, Pennell PB, Hauser WA, Gronseth GS, French JA, Wiebe S, Thurman D, Koppel BS, Kaplan PW, Robinson JN, Hopp J, Ting TY, Gidal B, Hovinga CA, Wilner AN, Vazquez B, Holmes L, Krumholz A, Finnell R, Hirtz D, Le Guen C, American Academy of Neurology; American Epilepsy Society: **Management issues for women with epilepsy-Focus on pregnancy (an evidence-based review): II. Teratogenesis and perinatal outcomes: Report of the Quality Standards Subcommittee and Therapeutics and Technology Subcommittee of the American Academy of Neurology and the American Epilepsy Society**. *Epilepsia* 2009, **50**(5):1237–1246.
- Samren EB, van Duijn CM, Koch S, Hiilesmaa VK, Klepel H, Bardy AH, Mannagetta GB, Deichl AW, Gaily E, Granstrom ML, Meinardi H, Grobbee DE, Hofman A, Janz D, Lindhout D: **Maternal use of antiepileptic drugs and the risk of major congenital malformations: a joint European prospective study of human teratogenesis associated with maternal epilepsy**. *Epilepsia* 1997, **38**(9):981–990.
- Meador K, Reynolds MW, Crean S, Fahrback K, Probst C: **Pregnancy outcomes in women with epilepsy: a systematic review and meta-analysis of published pregnancy registries and cohorts**. *Epilepsia Res* 2008, **81**(1):1–13.
- Adab N, Jacoby A, Smith D, Chadwick D: **Additional educational needs in children born to mothers with epilepsy**. *J Neurol Neurosurg Psychiatry* 2001, **70**(1):15–21.
- Adab N, Kini U, Vinten J, Ayres J, Baker G, Clayton-Smith J, Coyle H, Fryer A, Gorry J, Gregg J, Mawer G, Nicolaidis P, Pickering L, Tunnicliffe L, Chadwick DW: **The longer term outcome of children born to mothers with epilepsy**. *J Neurol Neurosurg Psychiatry* 2004, **75**(11):1575–1583.
- Gaily E, Kantola-Sorsa E, Hiilesmaa V, Isoaho M, Matila R, Kotila M, Nylund T, Bardy A, Kaaja E, Granstrom ML: **Normal intelligence in children with prenatal exposure to carbamazepine**. *Neurology* 2004, **62**(1):28–32.
- Meador KJ, Baker GA, Browning N, Clayton-Smith J, Combs-Cantrell DT, Cohen M, Kalayjian LA, Kanner A, Liporace JD, Pennell PB, Privitera M, Loring DW, for the NEAD Study Group: **Cognitive function at 3 years of age after fetal exposure to antiepileptic drugs**. *N Engl J Med* 2009, **360**(16):1597–1605.



<http://www.systematicreviewsjournal.com/content/3/1/68>

17. Holmes LB, Wyszynski DF, Lieberman E: **The AED (antiepileptic drug) pregnancy registry: a 6-year experience.** *Arch Neurol* 2004, **61**(5):673–678.
18. Reinisch JM, Sanders SA, Mortensen EL, Rubin DB: **In utero exposure to phenobarbital and intelligence deficits in adult men.** *JAMA* 1995, **274**(19):1518–1525.
19. Morrow J, Russell A, Guthrie E, Parsons L, Robertson I, Waddell R, Irwin B, McGivern RC, Morrison PJ, Craig J: **Malformation risks of antiepileptic drugs in pregnancy: a prospective study from the UK Epilepsy and Pregnancy Register.** *J Neurol Neurosurg Psychiatry* 2006, **77**(2):193–198.
20. Meador KJ, Baker GA, Finnell RH, Kalayjian LA, Liporace JD, Loring DW, Mawer G, Pennell PB, Smith JC, Wolff MC, NEAD Study Group: **In utero antiepileptic drug exposure: fetal death and malformations.** *Neurology* 2006, **67**(3):407–412.
21. Vajda FJ, Hitchcock A, Graham J, Solinas C, O'Brien TJ, Lander CM, Eadie MJ: **Foetal malformations and seizure control: 52 months data of the Australian Pregnancy Registry.** *Eur J Neurol* 2006, **13**(6):645–654.
22. Holmes LB, Baldwin EJ, Smith CR, Habecker E, Glassman L, Wong SL, Wyszynski DF: **Increased frequency of isolated cleft palate in infants exposed to lamotrigine during pregnancy.** *Neurology* 2008, **70**(22 Pt 2):2152–2158.
23. Meador KJ, Penovich P, Baker GA, Pennell PB, Bromfield E, Pack A, Liporace JD, Sam M, Kalayjian LA, Thurman DJ, Moore E, Loring DW, NEAD Study Group: **Antiepileptic drug use in women of childbearing age.** *Epilepsy Behav* 2009, **15**(3):339–343.
24. Moher D, Shamseer L, Clarke M, Ghersi D, Liberati A, Petticrew M, Shekelle P, Stewart L: **Reporting Guidelines for Systematic Review Protocols.** In *19th Cochrane Colloquium: 19–22 October 2011; Madrid, Spain.*
25. Ross CJ, Visscher H, Sistonen J, Brunham LR, Pussegoda K, Loo TT, Rieder MJ, Koren G, Carleton BC, Hayden MR, CPNDS Consortium: **The Canadian Pharmacogenomics Network for Drug Safety: a model for safety pharmacology.** *Thyroid* 2010, **20**(7):681–687.
26. Eypasch E, Lefering R, Kum CK, Troidl H: **Probability of adverse events that have not yet occurred: a statistical reminder.** *BMJ* 1995, **311**(7005):619–620.
27. Atkins D: **Creating and synthesizing evidence with decision makers in mind: integrating evidence from clinical trials and other study designs.** *Med Care* 2007, **45**(10 Suppl 2):S16–S22.
28. *Health Canada: Drug Product Database.* <http://www.hc-sc.gc.ca/dhp-mps/prodpharma/databasdon/index-eng.php>.
29. *United States National Library of Medicine's ChemIDPlus Lite Database.* <http://chem.sis.nlm.nih.gov/chemidplus/chemidlite.jsp>.
30. *Canadian Pharmacists Association: E-CPS (Compendium of Pharmaceuticals and Specialties).* <http://www.e-therapeutics.ca/home.whatsnew.action>.
31. *Epilepsy Canada: Anticonvulsant Medications.* <http://www.epilepsy.ca/en-CA/Diagnosis-and-Treatment/Anticonvulsant-Medications.html>.
32. *Epilepsy Ontario: Anticonvulsant/Anti-Seizure Medication from A to Z.* <http://epilepsyontario.org/anticonvulsantanti-seizure-medication-from-a-to-z/>.
33. Sampson M, McGowan J, Cogo E, Grimshaw J, Moher D, Lefebvre C: **An evidence-based practice guideline for the peer review of electronic search strategies.** *J Clin Epidemiol* 2009, **62**(9):944–952.
34. *Canadian Agency for Drugs and Technologies in Health: Grey Matters: A Practical Search Tool for Evidence-Based Medicine.* <http://www.cadth.ca/resources/grey-matters>.
35. Adab N, Tudur SC, Vinten J, Williamson P, Winterbottom J: **Common antiepileptic drugs in pregnancy in women with epilepsy.** *Cochrane Database Syst Rev* 2004, **3**:CD004848.
36. Banach R, Boskovic R, Einarson T, Koren G: **Long-term developmental outcome of children of women with epilepsy, unexposed or exposed prenatally to antiepileptic drugs: a meta-analysis of cohort studies.** *Drug Saf* 2010, **33**(1):73–79.
37. Landis JR, Koch GG: **The measurement of observer agreement for categorical data.** *Biometrics* 1977, **33**(1):159–174.
38. *SynthesiSR.* <http://knowledgetranslation.ca/sysrev/login.php>.
39. Stone PW: **Popping the (PICO) question in research and evidence-based practice.** *Appl Nurs Res* 2002, **15**(3):197–198.
40. *Cochrane Effective Practice and Organization of Care Group Draft Risk of Bias Tool.* <http://epoc.cochrane.org/epoc-author-resources>.
41. *The Newcastle-Ottawa Scale (NOS) for Assessing the Quality of Nonrandomised Studies in Meta-Analyses.* [http://www.ohri.ca/programs/clinical\\_epidemiology/oxford.asp](http://www.ohri.ca/programs/clinical_epidemiology/oxford.asp).
42. Santaguida PL, Raina P, Ismaila A: *The Development of the McHarm Quality Assessment Scale for Adverse Events.* Hamilton, Ontario: McMaster University; 2008.
43. Raudenbush SW: **Analyzing Effect Sizes: Random Effects Models.** In *The Handbook of Research Synthesis and Meta-analysis.* 2nd edition. Edited by Cooper H, Hedges LV, Valentine JC. New York: Russell Sage Foundation; 2009:295–315.
44. Viechtbauer W: **Bias and efficiency of meta-analytic variance estimators in the random-effects model.** *J Educ Behav Stat* 2005, **30**(3):261–293.
45. Higgins JP, Thompson SG: **Quantifying heterogeneity in a meta-analysis.** *Stat Med* 2002, **21**(11):1539–1558.
46. Viechtbauer W: **Confidence intervals for the amount of heterogeneity in meta-analysis.** *Stat Med* 2007, **26**(1):37–52.
47. Higgins JPT, Green S: *Cochrane Handbook for Systematic Reviews of Interventions.* The Cochrane Collaboration; 2009. <http://www.cochrane.org/handbook>.
48. Sweeting MJ, Sutton AJ, Lambert PC: **What to add to nothing? Use and avoidance of continuity corrections in meta-analysis of sparse data.** *Stat Med* 2004, **23**(9):1351–1375.
49. Bradburn MJ, Deeks JJ, Berlin JA, Russell Localio A: **Much ado about nothing: a comparison of the performance of meta-analytical methods with rare events.** *Stat Med* 2007, **26**(1):53–77.
50. Littell JH, Corcoran J, Pillai V: *Systematic Reviews and Meta-Analysis.* New York: Oxford University Press; 2008.
51. Carpenter J, Rucker G, Schwarzer G: **Assessing the sensitivity of meta-analysis to selection bias: a multiple imputation approach.** *Biometrics* 2011, **67**(3):1066–1072.
52. *Conducting Meta-Analyses in R with the metafor Package.* <http://www.jstatsoft.org/v36/i03/>.
53. Salanti G, Ades AE, Ioannidis JP: **Graphical methods and numerical summaries for presenting results from multiple-treatment meta-analysis: an overview and tutorial.** *J Clin Epidemiol* 2011, **64**(2):163–171.
54. Salanti G: **Indirect and mixed-treatment comparison, network, or multiple-treatments meta-analysis: many names, many benefits, many concerns for the next generation evidence synthesis tool.** *Res Synth Methods* 2012, **3**(2):80–97.
55. Song F, Altman DG, Glenny AM, Deeks JJ: **Validity of indirect comparison for estimating efficacy of competing interventions: empirical evidence from published meta-analyses.** *BMJ* 2003, **326**(7387):472.
56. Veroniki AA, Vasiliadis HS, Higgins JP, Salanti G: **Evaluation of inconsistency in networks of interventions.** *Int J Epidemiol* 2013, **42**(1):332–345.
57. Dias S, Welton NJ, Caldwell DM, Ades AE: **Checking consistency in mixed treatment comparison meta-analysis.** *Stat Med* 2010, **29**(7–8):932–944.
58. White IR, Barrett JK, Jackson D, Higgins JPT: **Consistency and inconsistency in network meta-analysis: model estimation using multivariate meta-regression.** *Res Synth Methods* 2012, **3**(2):111–125.
59. Jackson D, Barrett JK, Stephen R, White IR, Higgins JPT: **A design-by-treatment interaction model for network meta-analysis with random inconsistency effects.** *Stat Med* 2014, In press.
60. White IR: **Multivariate random-effects meta-regression: updates to mvmeta.** *Stata J* 2011, **11**(2):255–270.
61. Centers for Disease Control and Prevention: *Unintended Pregnancy Prevention.* <http://www.cdc.gov/reproductivehealth/unintendedpregnancy/>.
62. Yerby MS: **Pregnancy, teratogenesis, and epilepsy.** *Neurol Clin* 1994, **12**(4):749–771.

doi:10.1186/2046-4053-3-68

**Cite this article as:** Tricco et al.: Comparative safety of anti-epileptic drugs among infants and children exposed *in utero* or during breastfeeding: protocol for a systematic review and network meta-analysis. *Systematic Reviews* 2014 **3**:68.

## PRISMA NMA Checklist

| Section/Topic             | Item # | Checklist Item*                                                                                                                                                                                                                                                                                                                                                                                                                                                                                                                                                                                                                                                                                                                                                                        | Reported on Page # |
|---------------------------|--------|----------------------------------------------------------------------------------------------------------------------------------------------------------------------------------------------------------------------------------------------------------------------------------------------------------------------------------------------------------------------------------------------------------------------------------------------------------------------------------------------------------------------------------------------------------------------------------------------------------------------------------------------------------------------------------------------------------------------------------------------------------------------------------------|--------------------|
| <b>TITLE</b>              |        |                                                                                                                                                                                                                                                                                                                                                                                                                                                                                                                                                                                                                                                                                                                                                                                        |                    |
| Title                     | 1      | Identify the report as a systematic review <i>incorporating a network meta-analysis (or related form of meta-analysis).</i>                                                                                                                                                                                                                                                                                                                                                                                                                                                                                                                                                                                                                                                            | 1                  |
| <b>ABSTRACT</b>           |        |                                                                                                                                                                                                                                                                                                                                                                                                                                                                                                                                                                                                                                                                                                                                                                                        |                    |
| Structured summary        | 2      | Provide a structured summary including, as applicable:<br><b>Background:</b> main objectives<br><b>Methods:</b> data sources; study eligibility criteria, participants, and interventions; study appraisal; and <i>synthesis methods, such as network meta-analysis.</i><br><b>Results:</b> number of studies and participants identified; summary estimates with corresponding confidence/credible intervals; <i>treatment rankings may also be discussed. Authors may choose to summarize pairwise comparisons against a chosen treatment included in their analyses for brevity.</i><br><b>Discussion/Conclusions:</b> limitations; conclusions and implications of findings.<br><b>Other:</b> primary source of funding; systematic review registration number with registry name. | 4-5                |
| <b>INTRODUCTION</b>       |        |                                                                                                                                                                                                                                                                                                                                                                                                                                                                                                                                                                                                                                                                                                                                                                                        |                    |
| Rationale                 | 3      | Describe the rationale for the review in the context of what is already known, <i>including mention of why a network meta-analysis has been conducted.</i>                                                                                                                                                                                                                                                                                                                                                                                                                                                                                                                                                                                                                             | 7                  |
| Objectives                | 4      | Provide an explicit statement of questions being addressed, with reference to participants, interventions, comparisons, outcomes, and study design (PICOS).                                                                                                                                                                                                                                                                                                                                                                                                                                                                                                                                                                                                                            | 7                  |
| <b>METHODS</b>            |        |                                                                                                                                                                                                                                                                                                                                                                                                                                                                                                                                                                                                                                                                                                                                                                                        |                    |
| Protocol and registration | 5      | Indicate whether a review protocol exists and if and where it can be accessed (e.g., Web address); and, if available, provide registration information, including registration number.                                                                                                                                                                                                                                                                                                                                                                                                                                                                                                                                                                                                 | 8                  |

|    |                                        |    |                                                                                                                                                                                                                                                                                                                                                                                   |                            |
|----|----------------------------------------|----|-----------------------------------------------------------------------------------------------------------------------------------------------------------------------------------------------------------------------------------------------------------------------------------------------------------------------------------------------------------------------------------|----------------------------|
| 1  |                                        |    |                                                                                                                                                                                                                                                                                                                                                                                   |                            |
| 2  |                                        |    |                                                                                                                                                                                                                                                                                                                                                                                   |                            |
| 3  | Eligibility criteria                   | 6  | Specify study characteristics (e.g., PICOS, length of follow-up) and report characteristics (e.g., years considered, language, publication status) used as criteria for eligibility, giving rationale. <i>Clearly describe eligible treatments included in the treatment network, and note whether any have been clustered or merged into the same node (with justification).</i> | 8                          |
| 4  |                                        |    |                                                                                                                                                                                                                                                                                                                                                                                   |                            |
| 5  |                                        |    |                                                                                                                                                                                                                                                                                                                                                                                   |                            |
| 6  |                                        |    |                                                                                                                                                                                                                                                                                                                                                                                   |                            |
| 7  |                                        |    |                                                                                                                                                                                                                                                                                                                                                                                   |                            |
| 8  |                                        |    |                                                                                                                                                                                                                                                                                                                                                                                   |                            |
| 9  |                                        |    |                                                                                                                                                                                                                                                                                                                                                                                   |                            |
| 10 |                                        |    |                                                                                                                                                                                                                                                                                                                                                                                   |                            |
| 11 |                                        |    |                                                                                                                                                                                                                                                                                                                                                                                   |                            |
| 12 |                                        |    |                                                                                                                                                                                                                                                                                                                                                                                   |                            |
| 13 | Information sources                    | 7  | Describe all information sources (e.g., databases with dates of coverage, contact with study authors to identify additional studies) in the search and date last searched.                                                                                                                                                                                                        | 9                          |
| 14 |                                        |    |                                                                                                                                                                                                                                                                                                                                                                                   |                            |
| 15 |                                        |    |                                                                                                                                                                                                                                                                                                                                                                                   |                            |
| 16 |                                        |    |                                                                                                                                                                                                                                                                                                                                                                                   |                            |
| 17 |                                        |    |                                                                                                                                                                                                                                                                                                                                                                                   |                            |
| 18 | Search                                 | 8  | Present full electronic search strategy for at least one database, including any limits used, such that it could be repeated.                                                                                                                                                                                                                                                     | Additional File 1          |
| 19 |                                        |    |                                                                                                                                                                                                                                                                                                                                                                                   |                            |
| 20 |                                        |    |                                                                                                                                                                                                                                                                                                                                                                                   |                            |
| 21 | Study selection                        | 9  | State the process for selecting studies (i.e., screening, eligibility, included in systematic review, and, if applicable, included in the meta-analysis).                                                                                                                                                                                                                         | 9                          |
| 22 |                                        |    |                                                                                                                                                                                                                                                                                                                                                                                   |                            |
| 23 |                                        |    |                                                                                                                                                                                                                                                                                                                                                                                   |                            |
| 24 |                                        |    |                                                                                                                                                                                                                                                                                                                                                                                   |                            |
| 25 |                                        |    |                                                                                                                                                                                                                                                                                                                                                                                   |                            |
| 26 | Data collection process                | 10 | Describe method of data extraction from reports (e.g., piloted forms, independently, in duplicate) and any processes for obtaining and confirming data from investigators.                                                                                                                                                                                                        | 9                          |
| 27 |                                        |    |                                                                                                                                                                                                                                                                                                                                                                                   |                            |
| 28 |                                        |    |                                                                                                                                                                                                                                                                                                                                                                                   |                            |
| 29 |                                        |    |                                                                                                                                                                                                                                                                                                                                                                                   |                            |
| 30 |                                        |    |                                                                                                                                                                                                                                                                                                                                                                                   |                            |
| 31 | Data items                             | 11 | List and define all variables for which data were sought (e.g., PICOS, funding sources) and any assumptions and simplifications made.                                                                                                                                                                                                                                             | Additional File 1          |
| 32 |                                        |    |                                                                                                                                                                                                                                                                                                                                                                                   |                            |
| 33 |                                        |    |                                                                                                                                                                                                                                                                                                                                                                                   |                            |
| 34 | Geometry of the network                | S1 | Describe methods used to explore the geometry of the treatment network under study and potential biases related to it. This should include how the evidence base has been graphically summarized for presentation, and what characteristics were compiled and used to describe the evidence base to readers.                                                                      | 10-12                      |
| 35 |                                        |    |                                                                                                                                                                                                                                                                                                                                                                                   |                            |
| 36 |                                        |    |                                                                                                                                                                                                                                                                                                                                                                                   |                            |
| 37 |                                        |    |                                                                                                                                                                                                                                                                                                                                                                                   |                            |
| 38 |                                        |    |                                                                                                                                                                                                                                                                                                                                                                                   |                            |
| 39 |                                        |    |                                                                                                                                                                                                                                                                                                                                                                                   |                            |
| 40 |                                        |    |                                                                                                                                                                                                                                                                                                                                                                                   |                            |
| 41 |                                        |    |                                                                                                                                                                                                                                                                                                                                                                                   |                            |
| 42 | Risk of bias within individual studies | 12 | Describe methods used for assessing risk of bias of individual studies (including specification of whether this was done at the study or outcome level), and how this information is to be used in any data synthesis.                                                                                                                                                            | 9-10 (see also Appendix A) |
| 43 |                                        |    |                                                                                                                                                                                                                                                                                                                                                                                   |                            |
| 44 |                                        |    |                                                                                                                                                                                                                                                                                                                                                                                   |                            |
| 45 |                                        |    |                                                                                                                                                                                                                                                                                                                                                                                   |                            |
| 46 |                                        |    |                                                                                                                                                                                                                                                                                                                                                                                   |                            |
| 47 |                                        |    |                                                                                                                                                                                                                                                                                                                                                                                   |                            |
| 48 | Summary measures                       | 13 | State the principal summary measures (e.g., risk ratio, difference in means). <i>Also describe the use of additional summary measures assessed, such as treatment rankings and surface under the cumulative ranking curve (SUCRA) values, as well as modified approaches used to present summary findings from meta-analyses.</i>                                                 | 10-12                      |
| 49 |                                        |    |                                                                                                                                                                                                                                                                                                                                                                                   |                            |
| 50 |                                        |    |                                                                                                                                                                                                                                                                                                                                                                                   |                            |
| 51 |                                        |    |                                                                                                                                                                                                                                                                                                                                                                                   |                            |
| 52 |                                        |    |                                                                                                                                                                                                                                                                                                                                                                                   |                            |
| 53 |                                        |    |                                                                                                                                                                                                                                                                                                                                                                                   |                            |
| 54 |                                        |    |                                                                                                                                                                                                                                                                                                                                                                                   |                            |
| 55 |                                        |    |                                                                                                                                                                                                                                                                                                                                                                                   |                            |
| 56 |                                        |    |                                                                                                                                                                                                                                                                                                                                                                                   |                            |
| 57 |                                        |    |                                                                                                                                                                                                                                                                                                                                                                                   |                            |
| 58 |                                        |    |                                                                                                                                                                                                                                                                                                                                                                                   |                            |
| 59 |                                        |    |                                                                                                                                                                                                                                                                                                                                                                                   |                            |
| 60 |                                        |    |                                                                                                                                                                                                                                                                                                                                                                                   |                            |

|                                                                      |                                          |           |                                                                                                                                                                                                                                                                                                                                                                                                                                                   |                             |
|----------------------------------------------------------------------|------------------------------------------|-----------|---------------------------------------------------------------------------------------------------------------------------------------------------------------------------------------------------------------------------------------------------------------------------------------------------------------------------------------------------------------------------------------------------------------------------------------------------|-----------------------------|
| 1<br>2<br>3<br>4<br>5<br>6<br>7<br>8<br>9<br>10<br>11<br>12<br>13    | Planned methods of analysis              | 14        | Describe the methods of handling data and combining results of studies for each network meta-analysis. This should include, but not be limited to: <ul style="list-style-type: none"> <li>• <i>Handling of multi-arm trials;</i></li> <li>• <i>Selection of variance structure;</i></li> <li>• <i>Selection of prior distributions in Bayesian analyses; and</i></li> <li>• <i>Assessment of model fit.</i></li> </ul>                            | 10-12                       |
| 14<br>15<br>16<br>17<br>18                                           | Assessment of Inconsistency              | <b>S2</b> | Describe the statistical methods used to evaluate the agreement of direct and indirect evidence in the treatment network(s) studied. Describe efforts taken to address its presence when found.                                                                                                                                                                                                                                                   | 10-11                       |
| 19<br>20<br>21<br>22                                                 | Risk of bias across studies              | 15        | Specify any assessment of risk of bias that may affect the cumulative evidence (e.g., publication bias, selective reporting within studies).                                                                                                                                                                                                                                                                                                      | 9-10                        |
| 23<br>24<br>25<br>26<br>27<br>28<br>29<br>30<br>31<br>32<br>33<br>34 | Additional analyses                      | 16        | Describe methods of additional analyses if done, indicating which were pre-specified. This may include, but not be limited to, the following: <ul style="list-style-type: none"> <li>• Sensitivity or subgroup analyses;</li> <li>• Meta-regression analyses;</li> <li>• <i>Alternative formulations of the treatment network; and</i></li> <li>• <i>Use of alternative prior distributions for Bayesian analyses (if applicable).</i></li> </ul> | 11-12                       |
| 35<br>36<br>37                                                       | <b>RESULTS<sup>†</sup></b>               |           |                                                                                                                                                                                                                                                                                                                                                                                                                                                   |                             |
| 38<br>39<br>40<br>41<br>42                                           | Study selection                          | 17        | Give numbers of studies screened, assessed for eligibility, and included in the review, with reasons for exclusions at each stage, ideally with a flow diagram.                                                                                                                                                                                                                                                                                   | 13 and Figure 1             |
| 43<br>44<br>45<br>46                                                 | <b>Presentation of network structure</b> | <b>S3</b> | Provide a network graph of the included studies to enable visualization of the geometry of the treatment network.                                                                                                                                                                                                                                                                                                                                 | Figure 2                    |
| 47<br>48<br>49<br>50<br>51<br>52<br>53<br>54                         | <b>Summary of network geometry</b>       | <b>S4</b> | Provide a brief overview of characteristics of the treatment network. This may include commentary on the abundance of trials and randomized patients for the different interventions and pairwise comparisons in the network, gaps of evidence in the treatment network, and potential biases reflected by the network structure.                                                                                                                 | 14-18                       |
| 55<br>56<br>57<br>58<br>59<br>60                                     | Study characteristics                    | 18        | For each study, present characteristics for which data were extracted (e.g., study size, PICOS, follow-up period) and provide the citations.                                                                                                                                                                                                                                                                                                      | Table 1, Appendices D and E |

|                                      |           |                                                                                                                                                                                                                                                                                                                                                                                                                                                              |                                                           |
|--------------------------------------|-----------|--------------------------------------------------------------------------------------------------------------------------------------------------------------------------------------------------------------------------------------------------------------------------------------------------------------------------------------------------------------------------------------------------------------------------------------------------------------|-----------------------------------------------------------|
| Risk of bias within studies          | 19        | Present data on risk of bias of each study and, if available, any outcome level assessment.                                                                                                                                                                                                                                                                                                                                                                  | Appendix F                                                |
| Results of individual studies        | 20        | For all outcomes considered (benefits or harms), present, for each study: 1) simple summary data for each intervention group, and 2) effect estimates and confidence intervals. <i>Modified approaches may be needed to deal with information from larger networks.</i>                                                                                                                                                                                      | N/A<br>(data can be provided by the corresponding author) |
| Synthesis of results                 | 21        | Present results of each meta-analysis done, including confidence/credible intervals. <i>In larger networks, authors may focus on comparisons versus a particular comparator (e.g. placebo or standard care), with full findings presented in an appendix. League tables and forest plots may be considered to summarize pairwise comparisons.</i> If additional summary measures were explored (such as treatment rankings), these should also be presented. | 15-18,<br>Figure 3,<br>Appendices H, I, J                 |
| <b>Exploration for inconsistency</b> | <b>S5</b> | Describe results from investigations of inconsistency. This may include such information as measures of model fit to compare consistency and inconsistency models, <i>P</i> values from statistical tests, or summary of inconsistency estimates from different parts of the treatment network.                                                                                                                                                              | 14 (see also Appendix H)                                  |
| Risk of bias across studies          | 22        | Present results of any assessment of risk of bias across studies for the evidence base being studied.                                                                                                                                                                                                                                                                                                                                                        | 14 (see also Appendix G)                                  |
| Results of additional analyses       | 23        | Give results of additional analyses, if done (e.g., sensitivity or subgroup analyses, meta-regression analyses, <i>alternative network geometries studied, alternative choice of prior distributions for Bayesian analyses, and so forth.</i> )                                                                                                                                                                                                              | Appendix K                                                |
| <b>DISCUSSION</b>                    |           |                                                                                                                                                                                                                                                                                                                                                                                                                                                              |                                                           |
| Summary of evidence                  | 24        | Summarize the main findings, including the strength of evidence for each main outcome; consider their relevance to key groups (e.g., healthcare providers, users, and policy-makers).                                                                                                                                                                                                                                                                        | 19-21                                                     |
| Limitations                          | 25        | Discuss limitations at study and outcome level (e.g., risk of bias), and at review level (e.g., incomplete retrieval of identified research, reporting bias). <i>Comment on the validity of the assumptions, such as transitivity and consistency. Comment on any concerns regarding network geometry (e.g., avoidance of certain comparisons).</i>                                                                                                          | 21-23                                                     |

|    |                |    |                                                        |
|----|----------------|----|--------------------------------------------------------|
| 1  |                |    |                                                        |
| 2  |                |    |                                                        |
| 3  | Conclusions    | 26 | Provide a general interpretation of the results in the |
| 4  |                |    | context of other evidence, and implications for        |
| 5  |                |    | future research.                                       |
| 6  |                |    |                                                        |
| 7  |                |    |                                                        |
| 8  | <b>FUNDING</b> |    |                                                        |
| 9  | Funding        | 27 | Describe sources of funding for the systematic         |
| 10 |                |    | review and other support (e.g., supply of data);       |
| 11 |                |    | role of funders for the systematic review. This        |
| 12 |                |    | should also include information regarding whether      |
| 13 |                |    | funding has been received from manufacturers of        |
| 14 |                |    | treatments in the network and/or whether some of       |
| 15 |                |    | the authors are content experts with professional      |
| 16 |                |    | conflicts of interest that could affect use of         |
| 17 |                |    | treatments in the network.                             |
| 18 |                |    |                                                        |
| 19 |                |    |                                                        |
| 20 |                |    |                                                        |
| 21 |                |    |                                                        |
| 22 |                |    |                                                        |
| 23 |                |    |                                                        |
| 24 |                |    |                                                        |
| 25 |                |    |                                                        |
| 26 |                |    |                                                        |
| 27 |                |    |                                                        |
| 28 |                |    |                                                        |
| 29 |                |    |                                                        |
| 30 |                |    |                                                        |
| 31 |                |    |                                                        |
| 32 |                |    |                                                        |
| 33 |                |    |                                                        |
| 34 |                |    |                                                        |
| 35 |                |    |                                                        |
| 36 |                |    |                                                        |
| 37 |                |    |                                                        |
| 38 |                |    |                                                        |
| 39 |                |    |                                                        |
| 40 |                |    |                                                        |
| 41 |                |    |                                                        |
| 42 |                |    |                                                        |
| 43 |                |    |                                                        |
| 44 |                |    |                                                        |
| 45 |                |    |                                                        |
| 46 |                |    |                                                        |
| 47 |                |    |                                                        |
| 48 |                |    |                                                        |
| 49 |                |    |                                                        |
| 50 |                |    |                                                        |
| 51 |                |    |                                                        |
| 52 |                |    |                                                        |
| 53 |                |    |                                                        |
| 54 |                |    |                                                        |
| 55 |                |    |                                                        |
| 56 |                |    |                                                        |
| 57 |                |    |                                                        |
| 58 |                |    |                                                        |
| 59 |                |    |                                                        |
| 60 |                |    |                                                        |

**Abbreviations:** PICOS - population, intervention, comparators, outcomes, study design

\* Text in italics indicates wording specific to reporting of network meta-analyses that has been added to guidance from the PRISMA statement.

† Authors may wish to plan for use of appendices to present all relevant information in full detail for items in this section.

## Supplementary Online Content

---

|                                                                                                                                                                                            |    |
|--------------------------------------------------------------------------------------------------------------------------------------------------------------------------------------------|----|
| Appendix A. Newcastle-Ottawa Scale scoring guide .....                                                                                                                                     | 2  |
| Appendix B. List of included studies.....                                                                                                                                                  | 11 |
| Appendix C. Key excluded studies.....                                                                                                                                                      | 14 |
| Appendix D. Table of Individual Study characteristics.....                                                                                                                                 | 16 |
| Appendix E. Table of Patient characteristics.....                                                                                                                                          | 21 |
| Appendix F. Methodological quality of observational studies – Newcastle Ottawa Scale results                                                                                               | 23 |
| Appendix G. Comparison-adjusted funnel plots* .....                                                                                                                                        | 25 |
| Appendix H. Statistically significant network meta-analysis results along with meta-analysis results, transitivity, and inconsistency assessments.....                                     | 26 |
| Appendix I. Rank-heat plot of cognitive developmental delay, autism/dyspraxia, psychomotor developmental delay, language delay, and attention deficit hyperactivity disorder outcomes* ... | 30 |
| Appendix J. Number of studies and treatments per outcome .....                                                                                                                             | 32 |
| Appendix K. Sensitivity and network meta-regression analyses - Anti-epileptic drugs compared with Control .....                                                                            | 33 |

Appendix A. Newcastle-Ottawa Scale scoring guide

**COHORT Studies**

| Excel Column                                       | NOS* Answer Options**                                                                                                                                                                                                                                                                                                                                       | NOS Coding Manual*                                                                                                                                                                                                                                                                                                                                                                                                                                                                                                                                                                                                                                                                                                                                                                                                                                                                                                                                                                             |
|----------------------------------------------------|-------------------------------------------------------------------------------------------------------------------------------------------------------------------------------------------------------------------------------------------------------------------------------------------------------------------------------------------------------------|------------------------------------------------------------------------------------------------------------------------------------------------------------------------------------------------------------------------------------------------------------------------------------------------------------------------------------------------------------------------------------------------------------------------------------------------------------------------------------------------------------------------------------------------------------------------------------------------------------------------------------------------------------------------------------------------------------------------------------------------------------------------------------------------------------------------------------------------------------------------------------------------------------------------------------------------------------------------------------------------|
| <b>RefID</b>                                       | Enter the report's RefID.                                                                                                                                                                                                                                                                                                                                   |                                                                                                                                                                                                                                                                                                                                                                                                                                                                                                                                                                                                                                                                                                                                                                                                                                                                                                                                                                                                |
| <b>DA</b>                                          | Enter your initials.                                                                                                                                                                                                                                                                                                                                        |                                                                                                                                                                                                                                                                                                                                                                                                                                                                                                                                                                                                                                                                                                                                                                                                                                                                                                                                                                                                |
| <b>First author</b>                                | Enter the first author's last name.                                                                                                                                                                                                                                                                                                                         |                                                                                                                                                                                                                                                                                                                                                                                                                                                                                                                                                                                                                                                                                                                                                                                                                                                                                                                                                                                                |
| <b>Year of publication</b>                         | Enter the year of the publication.                                                                                                                                                                                                                                                                                                                          |                                                                                                                                                                                                                                                                                                                                                                                                                                                                                                                                                                                                                                                                                                                                                                                                                                                                                                                                                                                                |
| <b>SELECTION:</b>                                  |                                                                                                                                                                                                                                                                                                                                                             |                                                                                                                                                                                                                                                                                                                                                                                                                                                                                                                                                                                                                                                                                                                                                                                                                                                                                                                                                                                                |
| <b>1) Representativeness of the exposed cohort</b> | <ul style="list-style-type: none"> <li>a) truly representative of the average pregnant woman taking AEDs in the community</li> <li>b) somewhat representative of the average pregnant woman taking AEDs in the community</li> <li>c) selected group of users e.g., nurses, volunteers</li> <li>d) no description of the derivation of the cohort</li> </ul> | <p>Item is assessing the representativeness of exposed individuals in the community, not the representativeness of the sample of women from some general population.</p> <p>For example, subjects derived from groups likely to contain middle class, better educated, health oriented women are likely to be representative of postmenopausal estrogen users while they are not representative of all women (e.g. members of a health maintenance organisation (HMO) will be a representative sample of estrogen users. While the HMO may have an under-representation of ethnic groups, the poor, and poorly educated, these excluded groups are not the predominant users of estrogen).</p> <p><u>Note:</u><br/>Truly representative (A) is a population-based cohort at the provincial or national levels (e.g., a sample from 2 cities is not enough). We need very 'broad' sample of the population.</p> <p>Somewhat representative (B) includes private clinics, hospital-based, or</p> |



|                                                                                    |                                                                                                                                                                                                                           |                                                                                                                                                                                                                                                                                                                                                                                                                                                                             |
|------------------------------------------------------------------------------------|---------------------------------------------------------------------------------------------------------------------------------------------------------------------------------------------------------------------------|-----------------------------------------------------------------------------------------------------------------------------------------------------------------------------------------------------------------------------------------------------------------------------------------------------------------------------------------------------------------------------------------------------------------------------------------------------------------------------|
|                                                                                    |                                                                                                                                                                                                                           | community-based.                                                                                                                                                                                                                                                                                                                                                                                                                                                            |
| <b>2) Selection of the non-exposed cohort</b>                                      | <ul style="list-style-type: none"> <li>a) drawn from the same community as the exposed cohort</li> <li>b) drawn from a different source</li> <li>c) no description of the derivation of the non-exposed cohort</li> </ul> | <p><u>Note:</u><br/>In our review of mostly multi-arm studies, this question pertains to the study's comparator group(s) – including “active” controls (for example, a less teratogenic AED). Therefore, this will often be ‘A’ for our studies.</p>                                                                                                                                                                                                                        |
| <b>3) Ascertainment of exposure</b>                                                | <ul style="list-style-type: none"> <li>a) secure record (e.g., surgical records)</li> <li>b) structured interview</li> <li>c) written self-report</li> <li>d) no description</li> </ul>                                   | <p><u>Note:</u><br/>Option ‘A’ includes patient hospital records, prescription drug database, or hospital/clinic visits (e.g., patient is asked about “current” AED use during a visit with their doctor).</p> <p>Option ‘B’ includes a hospital/clinic visit, but the patients are asked to remember their AED use during pregnancy (e.g., retrospectively ascertained exposure).</p> <p>If a study used both medical records and interviews for everyone, select ‘A’.</p> |
| <b>4) Demonstration that outcome of interest was not present at start of study</b> | <ul style="list-style-type: none"> <li>a) yes</li> <li>b) no</li> </ul>                                                                                                                                                   | <p>In the case of mortality studies, outcome of interest is still the presence of a disease/incident, rather than death. That is to say that a statement of ‘no history of disease or incident’ earns a star (i.e. option ‘A’).</p> <p><u>Note:</u><br/>Since our review is on pregnant women, this question is ‘A’ for all.<br/><b>Please email us if a study involves breastfeeding women.</b></p>                                                                        |
| <b>COMPARABILITY:</b>                                                              |                                                                                                                                                                                                                           |                                                                                                                                                                                                                                                                                                                                                                                                                                                                             |
| <b>1) Comparability of cohorts on the basis of the design or analysis</b>          | <ul style="list-style-type: none"> <li>a) answer is BOTH B &amp; C (i.e. study controls for age and one other important factor)</li> <li>b) study controls for age of the women</li> </ul>                                | <p>Either exposed and non-exposed individuals must be matched in the design and/or confounders must be adjusted for in the analysis. Statements of no differences between groups or that differences were not statistically significant are not sufficient for establishing comparability.</p>                                                                                                                                                                              |

1  
2  
3  
4  
5  
6  
7  
8  
9  
10  
11  
12  
13  
14  
15  
16  
17  
18  
19  
20  
21  
22  
23  
24  
25  
26  
27  
28  
29  
30  
31  
32  
33  
34  
35  
36  
37  
38  
39  
40  
41  
42  
43  
44  
45  
46  
47  
48  
49

|  |                                                                                                                                          |                                                                                                                                                                                                                                                                                                                                                                                                                                                                                                                                                                                                                                                                                                                                                                                                                                                                                                                                                                                                                                                                                                                                                                                                                                                                                                                                                                                                                                                                                                                                                                                      |
|--|------------------------------------------------------------------------------------------------------------------------------------------|--------------------------------------------------------------------------------------------------------------------------------------------------------------------------------------------------------------------------------------------------------------------------------------------------------------------------------------------------------------------------------------------------------------------------------------------------------------------------------------------------------------------------------------------------------------------------------------------------------------------------------------------------------------------------------------------------------------------------------------------------------------------------------------------------------------------------------------------------------------------------------------------------------------------------------------------------------------------------------------------------------------------------------------------------------------------------------------------------------------------------------------------------------------------------------------------------------------------------------------------------------------------------------------------------------------------------------------------------------------------------------------------------------------------------------------------------------------------------------------------------------------------------------------------------------------------------------------|
|  | <p>c) study controls for any other important factor</p> <p>d) study does not control for any important factor or it is not described</p> | <p>Note: If the relative risk for the exposure of interest is adjusted for the confounders listed, then the groups will be considered to be comparable on each variable used in the adjustment.</p> <p>There may be multiple ratings for this item for different categories of exposure (e.g., ever vs. never, current vs. previous or never). [A maximum of 2 stars can be allotted in this category].</p> <p><u>Note:</u><br/>The study should have initially matched the groups or presented adjusted odds ratios, AND in addition, since in our review we are analyzing each AED arm separately (instead of the whole exposed cohort), the study must also report the factor of interest <b>for ‘each AED arm’</b> (or state that <b>‘each AED arm’</b> is matched).</p> <p><b><u>Thus, there are 2 parts to this question:</u></b></p> <p>1) <u>The study should have matched/adjusted for age at whatever level of groups they were focused on (even if they aren’t our abstracted AED arms); AND</u></p> <p>2) <u>Then the study should also have reported the age for each AED arm.</u></p> <p><u>If they haven’t done both of these 2 things, it’s a ‘D’ here (unless they happen to combine these by reporting adjusted ORs for each of our AED arms).</u></p> <p>For our review, this generally pertains to <b>the comparability of the MOTHERS.</b><br/>The exception here is in studies of cognitive/psychomotor development disorders in children - when age of the children should be comparable.</p> <p>The “other important factors” here are any one of these:</p> |
|--|------------------------------------------------------------------------------------------------------------------------------------------|--------------------------------------------------------------------------------------------------------------------------------------------------------------------------------------------------------------------------------------------------------------------------------------------------------------------------------------------------------------------------------------------------------------------------------------------------------------------------------------------------------------------------------------------------------------------------------------------------------------------------------------------------------------------------------------------------------------------------------------------------------------------------------------------------------------------------------------------------------------------------------------------------------------------------------------------------------------------------------------------------------------------------------------------------------------------------------------------------------------------------------------------------------------------------------------------------------------------------------------------------------------------------------------------------------------------------------------------------------------------------------------------------------------------------------------------------------------------------------------------------------------------------------------------------------------------------------------|

|                                        |                                                                                                                                                                    |                                                                                                                                                                                                                                                                                                                                                                                                                                                                                                                                                                                                                                                                                                                                                                                                                                                                                                                                                                                                              |
|----------------------------------------|--------------------------------------------------------------------------------------------------------------------------------------------------------------------|--------------------------------------------------------------------------------------------------------------------------------------------------------------------------------------------------------------------------------------------------------------------------------------------------------------------------------------------------------------------------------------------------------------------------------------------------------------------------------------------------------------------------------------------------------------------------------------------------------------------------------------------------------------------------------------------------------------------------------------------------------------------------------------------------------------------------------------------------------------------------------------------------------------------------------------------------------------------------------------------------------------|
|                                        |                                                                                                                                                                    | <ul style="list-style-type: none"> <li>• history of congenital malformations (CMs), fetal losses, preterm deliveries or small babies.</li> <li>• family history of genetic problems or CMs.</li> <li>• alcohol use.</li> <li>• nutritional deficiencies (e.g., lack of folic acid).</li> </ul> <p><u>Example:</u><br/>- Option ‘B’ indicates that the study initially matched groups based on the women’s age (or reported adjusted ORs) AND they report the mean women’s age for EACH of our arms (e.g., for Tx1, Tx2, etc.).</p>                                                                                                                                                                                                                                                                                                                                                                                                                                                                           |
| <p><b>OUTCOME:</b></p>                 |                                                                                                                                                                    |                                                                                                                                                                                                                                                                                                                                                                                                                                                                                                                                                                                                                                                                                                                                                                                                                                                                                                                                                                                                              |
| <p><b>1) Assessment of outcome</b></p> | <ul style="list-style-type: none"> <li>a) independent OR blind assessment</li> <li>b) record linkage</li> <li>c) self-report</li> <li>d) no description</li> </ul> | <p>For some outcomes (e.g. fractured hip), reference to the medical record is sufficient to satisfy the requirement for confirmation of the fracture. This would not be adequate for vertebral fracture outcomes where reference to x-rays would be required.</p> <ul style="list-style-type: none"> <li>a) Independent or blind assessment stated in the paper, or confirmation of the outcome by reference to secure records (x-rays, medical records, etc.)</li> <li>b) Record linkage (e.g. identified through ICD codes on database records)</li> <li>c) Self-report (i.e. no reference to original medical records or x-rays to confirm the outcome)</li> <li>d) No description.</li> </ul> <p><u>Note:</u><br/>Blind (A) is if they tell us that the outcome assessors were blinded to exposures; or if the outcome is objective.</p> <p>For our purposes, we will focus on the primary outcome of interest of our systematic review, which is <u>major malformations (an objective outcome)</u>.</p> |

1  
2  
3  
4  
5  
6  
7  
8  
9  
10  
11  
12  
13  
14  
15  
16  
17  
18  
19  
20  
21  
22  
23  
24  
25  
26  
27  
28  
29  
30  
31  
32  
33  
34  
35  
36  
37  
38  
39  
40  
41  
42  
43  
44  
45  
46  
47  
48  
49

1  
2  
3  
4  
5  
6  
7  
8  
9  
10  
11  
12  
13  
14  
15  
16  
17  
18  
19  
20  
21  
22  
23  
24  
25  
26  
27  
28  
29  
30  
31  
32  
33  
34  
35  
36  
37  
38  
39  
40  
41  
42  
43  
44  
45  
46  
47  
48  
49

|                                                                  |                                                                                                                                                                                                                                                                                                      |                                                                                                                                                                                                                                                                                                                                                                                                                                                                                                                                                                                                                                                                                                                                                                                                                                                                                                                                                                                                  |
|------------------------------------------------------------------|------------------------------------------------------------------------------------------------------------------------------------------------------------------------------------------------------------------------------------------------------------------------------------------------------|--------------------------------------------------------------------------------------------------------------------------------------------------------------------------------------------------------------------------------------------------------------------------------------------------------------------------------------------------------------------------------------------------------------------------------------------------------------------------------------------------------------------------------------------------------------------------------------------------------------------------------------------------------------------------------------------------------------------------------------------------------------------------------------------------------------------------------------------------------------------------------------------------------------------------------------------------------------------------------------------------|
|                                                                  |                                                                                                                                                                                                                                                                                                      | <p>So most of ours will be A, unless the study is only on a secondary outcome (e.g., cognitive development) and is based on the mother’s self-report of their child (e.g., not a clinical examination).</p>                                                                                                                                                                                                                                                                                                                                                                                                                                                                                                                                                                                                                                                                                                                                                                                      |
| <p><b>2) Was follow-up long enough for outcomes to occur</b></p> | <p>a) yes<br/>b) no</p>                                                                                                                                                                                                                                                                              | <p>An acceptable length of time should be decided before quality assessment begins (e.g. 5 yrs. for exposure to breast implants)</p> <p><u>Note:</u><br/>For this component, focus only on the outcomes that are reported in the results.<br/>For our purposes, we will focus on the primary outcome of interest of our systematic review, which is <u>major malformations</u>.</p> <ul style="list-style-type: none"> <li>• For studies focusing on ‘birth’ outcomes (i.e. malformations, preterm, fetal losses, born small), the answer is ‘A’ if they follow the groups until birth.</li> <li>• For studies focusing on cognitive developmental disorders, an adequate follow-up period (i.e. child’s age) is 4 years.</li> <li>• For studies focusing on psychomotor delays, an adequate follow-up period is the earliest point of detection of the disorder.</li> <li>• For studies focusing on neonatal seizures, an adequate follow-up period (i.e. infant’s age) is 6 months.</li> </ul> |
| <p><b>3) Adequacy of follow up of cohorts</b></p>                | <p>a) complete follow up - all subjects accounted for<br/>b) subjects lost to follow up unlikely to introduce bias - small number lost (see ‘Note’), or description provided of those lost<br/>c) follow up rate is inadequate (see ‘Note’) and no description of those lost<br/>d) no statement</p> | <p>This item assesses the follow-up of the exposed and non-exposed cohorts to ensure that losses are not related to either the exposure or the outcome.</p> <p><u>Note:</u><br/><b><u>Especially check ones that start their total sample size (or figure diagram) with only the ones who had “complete” data (or only those who they had “successfully” recruited), as these are often a ‘D’ (since they don’t report on the ones NOT followed up).</u></b></p> <ul style="list-style-type: none"> <li>• For a prospective study, <math>\geq 90\%</math> follow-up rate per year is adequate (e.g., 10% dropout or less for 1 year, 20% for 2 years of follow-up, etc.). This includes missing or incomplete data, etc.</li> </ul>                                                                                                                                                                                                                                                              |

|  |  |                                                                                                                                                                                                                                                                                                                                                                                        |
|--|--|----------------------------------------------------------------------------------------------------------------------------------------------------------------------------------------------------------------------------------------------------------------------------------------------------------------------------------------------------------------------------------------|
|  |  | <ul style="list-style-type: none"> <li>For a retrospective cohort study, <math>\geq 80\%</math> follow-up rate is adequate; including the ones that they could NOT recruit or who would NOT participate.</li> <li>For a survey/mail questionnaire, <math>\geq 75\%</math> response rate is adequate. (For a survey, a dropout rate is congruent to a survey response rate).</li> </ul> |
|--|--|----------------------------------------------------------------------------------------------------------------------------------------------------------------------------------------------------------------------------------------------------------------------------------------------------------------------------------------------------------------------------------------|

### CASE-CONTROL Studies

| Excel Column                               | NOS* Answer Options**                                                                                             | NOS Coding Manual*                                                                                                                                                                                                                                                                                                                                                                                                                                                                      |
|--------------------------------------------|-------------------------------------------------------------------------------------------------------------------|-----------------------------------------------------------------------------------------------------------------------------------------------------------------------------------------------------------------------------------------------------------------------------------------------------------------------------------------------------------------------------------------------------------------------------------------------------------------------------------------|
| <b>RefID</b>                               | Enter the report's RefID.                                                                                         |                                                                                                                                                                                                                                                                                                                                                                                                                                                                                         |
| <b>DA</b>                                  | Enter your initials.                                                                                              |                                                                                                                                                                                                                                                                                                                                                                                                                                                                                         |
| <b>First author</b>                        | Enter the first author's last name.                                                                               |                                                                                                                                                                                                                                                                                                                                                                                                                                                                                         |
| <b>Year of publication</b>                 | Enter the year of the publication.                                                                                |                                                                                                                                                                                                                                                                                                                                                                                                                                                                                         |
| <b>SELECTION:</b>                          |                                                                                                                   |                                                                                                                                                                                                                                                                                                                                                                                                                                                                                         |
| <b>1) Is the case definition adequate?</b> | a) yes, with independent validation<br>b) yes, e.g., record linkage or based on self-reports<br>c) no description | a) Requires some independent validation (e.g. >1 person/record/time/process to extract information, or reference to primary record source such as x-rays or medical/hospital records)<br>b) Record linkage (e.g. ICD codes in database) or self-report with no reference to primary record<br>c) No description<br><br><u>Note:</u><br>This question is assessing the group of infants that have the outcome of interest (e.g., CMs) – i.e. the “cases” in a case-control study design. |
| <b>2) Representativeness of the cases</b>  | a) consecutive or obviously representative series of cases<br>b) potential for selection biases, or not stated    | a) All eligible cases with outcome of interest over a defined period of time, all cases in a defined catchment area, all cases in a defined hospital or clinic, group of hospitals, health maintenance organisation, or an appropriate sample of those cases (e.g. random sample)<br>b) Not satisfying requirements in part (a), or not stated.                                                                                                                                         |

1  
2  
3  
4  
5  
6  
7  
8  
9  
10  
11  
12  
13  
14  
15  
16  
17  
18  
19  
20  
21  
22  
23  
24  
25  
26  
27  
28  
29  
30  
31  
32  
33  
34  
35  
36  
37  
38  
39  
40  
41  
42  
43  
44  
45  
46  
47  
48  
49

|                                                                                 |                                                                                                                                      |                                                                                                                                                                                                                                                                                                                                                                                                                                                                                                                                                                                                                                                                                  |
|---------------------------------------------------------------------------------|--------------------------------------------------------------------------------------------------------------------------------------|----------------------------------------------------------------------------------------------------------------------------------------------------------------------------------------------------------------------------------------------------------------------------------------------------------------------------------------------------------------------------------------------------------------------------------------------------------------------------------------------------------------------------------------------------------------------------------------------------------------------------------------------------------------------------------|
|                                                                                 |                                                                                                                                      | <p><u>Note:</u><br/>Option ‘A’ is a population-based sample.</p>                                                                                                                                                                                                                                                                                                                                                                                                                                                                                                                                                                                                                 |
| <p><b>3) Selection of controls</b></p>                                          | <p>a) community controls<br/>b) hospital controls<br/>c) no description</p>                                                          | <p>This item assesses whether the control series used in the study is derived from the same population as the cases and essentially would have been cases had the outcome been present.</p> <p>a) Community controls (i.e. same community as cases and would be cases if had outcome)<br/>b) Hospital controls, within same community as cases (i.e. not another city) but derived from a hospitalised population<br/>c) No description</p> <p><u>Note:</u><br/>This question is assessing the group of infants that don’t have the outcome (e.g., CMs) – i.e. the “controls” in a case-control study design.<br/>Community controls (A) includes a population-based sample.</p> |
| <p><b>4) Definition of controls</b></p>                                         | <p>a) no history of disease (endpoint)<br/>b) no description of source</p>                                                           | <p>a) If cases are first occurrence of outcome, then it must explicitly state that controls have no history of this outcome. If cases have new (not necessarily first) occurrence of outcome, then controls with previous occurrences of outcome of interest should not be excluded.<br/>b) No mention of history of outcome</p> <p><u>Note:</u><br/>Since our review is on fetal effects, this question is ‘A’ for all studies.<br/><b>Please email us if a study involves exposure during breastfeeding.</b></p>                                                                                                                                                               |
| <p><b>COMPARABILITY:</b></p>                                                    |                                                                                                                                      |                                                                                                                                                                                                                                                                                                                                                                                                                                                                                                                                                                                                                                                                                  |
| <p><b>1) Comparability of cases and controls on the basis of the design</b></p> | <p>a) answer is BOTH B &amp; C (i.e. study controls for age and one other important factor)<br/>b) study controls for age of the</p> | <p>Either cases and controls must be matched in the design and/or confounders must be adjusted for in the analysis. Statements of no differences between groups or that differences were not statistically significant are not sufficient for establishing comparability.</p>                                                                                                                                                                                                                                                                                                                                                                                                    |

|                                                                                                                                                                                                                                                                                                                                                                            |                                                                                                                                                       |                                                                                                                                                                                                                                                                                                                                                                                                                                                                                                                                                                                                                                                                                                                                                                                                                                                                                                                                                                                                                                                                                                                                                                                                                                                                                                                                                                                                                                                                                                                                                                  |
|----------------------------------------------------------------------------------------------------------------------------------------------------------------------------------------------------------------------------------------------------------------------------------------------------------------------------------------------------------------------------|-------------------------------------------------------------------------------------------------------------------------------------------------------|------------------------------------------------------------------------------------------------------------------------------------------------------------------------------------------------------------------------------------------------------------------------------------------------------------------------------------------------------------------------------------------------------------------------------------------------------------------------------------------------------------------------------------------------------------------------------------------------------------------------------------------------------------------------------------------------------------------------------------------------------------------------------------------------------------------------------------------------------------------------------------------------------------------------------------------------------------------------------------------------------------------------------------------------------------------------------------------------------------------------------------------------------------------------------------------------------------------------------------------------------------------------------------------------------------------------------------------------------------------------------------------------------------------------------------------------------------------------------------------------------------------------------------------------------------------|
| <p>1<br/>2<br/>3<br/>4<br/>5<br/>6<br/>7<br/>8<br/>9<br/>10<br/>11<br/>12<br/>13<br/>14<br/>15<br/>16<br/>17<br/>18<br/>19<br/>20<br/>21<br/>22<br/>23<br/>24<br/>25<br/>26<br/>27<br/>28<br/>29<br/>30<br/>31<br/>32<br/>33<br/>34<br/>35<br/>36<br/>37<br/>38<br/>39<br/>40<br/>41<br/>42<br/>43<br/>44<br/>45<br/>46<br/>47<br/>48<br/>49</p> <p><b>or analysis</b></p> | <p>women</p> <p>c) study controls for any other important factor</p> <p>d) study does not control for any important factor or it is not described</p> | <p>Note: If the odds ratio for the exposure of interest is adjusted for the confounders listed, then the groups will be considered to be comparable on each variable used in the adjustment.</p> <p>There may be multiple ratings for this item for different categories of exposure (e.g. ever vs. never, current vs. previous or never). [A maximum of 2 stars can be allotted in this category].</p> <p><u>Note:</u><br/>The study should have initially matched the groups, AND in addition, since in our review we are analyzing each AED arm separately (instead of the whole cases group), the study must also report the factor of interest <b>for ‘each AED arm’</b> (or state that ‘<b>each AED arm</b>’ is matched).</p> <p>For our review, this generally pertains to <b>the comparability of the MOTHERS of the cases and controls.</b><br/>The exception here is in studies of cognitive/psychomotor development disorders in children - when age of the children should be comparable.</p> <p>The “other important factors” here are any one of these:</p> <ul style="list-style-type: none"> <li>• history of congenital malformations (CMs), fetal losses, preterm deliveries or small babies.</li> <li>• family history of genetic problems or CMs.</li> <li>• alcohol use.</li> <li>• nutritional deficiencies (e.g., lack of folic acid).</li> </ul> <p>For example, Option ‘B’ indicates that the study initially matched groups based on the women’s age AND they report the mean women’s age for EACH arm (e.g., for Tx1, Tx2, etc.).</p> |
| <p><b>EXPOSURE:</b></p>                                                                                                                                                                                                                                                                                                                                                    |                                                                                                                                                       |                                                                                                                                                                                                                                                                                                                                                                                                                                                                                                                                                                                                                                                                                                                                                                                                                                                                                                                                                                                                                                                                                                                                                                                                                                                                                                                                                                                                                                                                                                                                                                  |

1  
2  
3  
4  
5  
6  
7  
8  
9  
10  
11  
12  
13  
14  
15  
16  
17  
18  
19  
20  
21  
22  
23  
24  
25  
26  
27  
28  
29  
30  
31  
32  
33  
34  
35  
36  
37  
38  
39  
40  
41  
42  
43  
44  
45  
46  
47  
48  
49

|                                                               |                                                                                                                                                                                                                                                                                                            |                                                                                                                                                                                                                                                                                                                                                                                                                         |
|---------------------------------------------------------------|------------------------------------------------------------------------------------------------------------------------------------------------------------------------------------------------------------------------------------------------------------------------------------------------------------|-------------------------------------------------------------------------------------------------------------------------------------------------------------------------------------------------------------------------------------------------------------------------------------------------------------------------------------------------------------------------------------------------------------------------|
| <b>1) Assessment of exposure</b>                              | <ul style="list-style-type: none"> <li>a) secure record (e.g., surgical records)</li> <li>b) structured interview where blind to case/control status</li> <li>c) interview not blinded to case/control status</li> <li>d) written self-report or medical record only</li> <li>e) no description</li> </ul> | <p><u>Note:</u><br/>Option ‘A’ includes patient hospital records, prescription drug database, or hospital/clinic visits (e.g., patient is asked about “current” AED use during a visit with their doctor).</p> <p>“Interview” here includes a hospital/clinic visit, but the patients are asked to remember their AED use during pregnancy (e.g., retrospectively ascertained exposure).</p>                            |
| <b>2) Same method of ascertainment for cases and controls</b> | <ul style="list-style-type: none"> <li>a) yes</li> <li>b) no</li> </ul>                                                                                                                                                                                                                                    | <p><u>Note:</u><br/>This question is asking whether the method of <u>ascertainment of exposure</u> was the same for ‘cases’ (with the outcome) and ‘controls’ (without the outcome; in this case-control study design).</p>                                                                                                                                                                                             |
| <b>3) Non-response rate</b>                                   | <ul style="list-style-type: none"> <li>a) same rate for both groups</li> <li>b) non-respondents described</li> <li>c) rate different and no designation</li> </ul>                                                                                                                                         | <p><u>Note:</u><br/>For our review, this pertains to either the infants or the mothers of the case and control groups.</p> <p>We’re allowing 10% dropout per year for a prospective study – e.g., 10% for 1 year, 20% for 2 years of follow-up, etc.</p> <p>For a survey, we allow for a 75% response rate in order for it be adequate.</p> <p>For a survey, a dropout rate is congruent to a survey response rate.</p> |

\*Wells GA, Shea B, O'Connell D, Peterson J, Welch V, Losos M, Tugwell P. The Newcastle-Ottawa Scale (NOS) for assessing the quality of non-randomised studies in meta-analyses. Available at: [http://www.ohri.ca/programs/clinical\\_epidemiology/oxford.asp](http://www.ohri.ca/programs/clinical_epidemiology/oxford.asp)

\*\*In the “NOS Coding Manual” column, the first section for each item is copied straight from the NOS documentation while the lower portions in each item are our “Notes” tailored for the AED review.



## Appendix B. List of included studies

A total of 29 cohort studies<sup>1-29</sup> with 9 companion reports<sup>30-38</sup> were included

1. Adab N, Kini U, Vinten J, et al. The longer term outcome of children born to mothers with epilepsy. *J Neurol Neurosurg Psychiatry*. 2004;75(11):1575-83.
2. Arkilo D, Hanna J, Dickens D, et al. Pregnancy and neurodevelopmental outcomes with in-utero antiepileptic agent exposure. A pilot study. *Eur J Paediatr Neurol*. 2015;19(1):37-40.
3. Bromley R, Baxter N, Calderbank R, Mawer G, Clayton-Smith J, Baker G. A comprehensive review of the language abilities of children exposed to valproate or carbamazepine in utero. American Epilepsy Society; Texas2010.
4. Bromley RL, Calderbank R, Cheyne CP, et al. Cognition in school-age children exposed to levetiracetam, topiramate, or sodium valproate. *Neurology*. 2016;87(18):1943-53.
5. Bromley RL, Mawer GE, Briggs M, et al. The prevalence of neurodevelopmental disorders in children prenatally exposed to antiepileptic drugs. *J Neurol Neurosurg Psychiatry*. 2013;84(6):637-43.
6. Christensen J, Gronborg TK, Sorensen MJ, et al. Prenatal valproate exposure and risk of autism spectrum disorders and childhood autism. *JAMA*. 2013;309(16):1696-703.
7. Cohen MJ, Meador KJ, Browning N, et al. Fetal antiepileptic drug exposure: Adaptive and emotional/behavioral functioning at age 6years. *Epilepsy Behav*. 2013;29(2):308-15.
8. Cummings C, Stewart M, Stevenson M, Morrow J, Nelson J. Neurodevelopment of children exposed in utero to lamotrigine, sodium valproate and carbamazepine. *Arch Dis Child*. 2011;96(7):643-7.
9. Dean JCS, Hailey H, Moore SJ, Lloyd DJ, Turnpenny PD, Little J. Long term health and neurodevelopment in children exposed to antiepileptic drugs before birth. *J Med Genet*. 2002;39(4):251-9.
10. D'Souza SW, Robertson IG, Donnai D, Mawer G. Fetal phenytoin exposure, hypoplastic nails, and jitteriness. *Arch Dis Child*. 1991;66(3):320-4.
11. Eriksson K, Viinikainen K, Mönkkönen A, et al. Children exposed to valproate in utero—Population based evaluation of risks and confounding factors for long-term neurocognitive development. *Epilepsy Res*. 2005;65(3):189-200.
12. Gaily E. Development and growth in children of epileptic mothers: a prospective controlled study. Helsinki, Finland: University of Helsinki; 1990.
13. Gogatishvili N, Ediberidze T, Lomidze G, Tatishvili N, Kasradze S. PO-0834 Long-term Developmental Outcome Of Children Prenatally Exposed To Antiepileptic Drugs. *Arch Dis Child*. 2014;99(Suppl 2):A526.
14. Gogatishvili N, Ediberidze T, Lomidze G, Tatishvili N, Kasradze S. Cognitive outcomes of children with fetal antiepileptic drug exposure at the age of 3-6 years-preliminary data. 1st Congress of the European Academy of Neurology; Berlin: European Journal of Neurology; 2015. p. 329.
15. Hurault-Delarue C, Damase-Michel C, Finotto L, et al. Psychomotor developmental effects of prenatal exposure to psychotropic drugs: a study in EFEMERIS database. *Fundam Clin Pharmacol*. 2016;30(5):476-82.
16. Jones KL, Lacro RV, Johnson KA, Adams J. Pattern of malformations in the children of women treated with carbamazepine during pregnancy. *N Engl J Med*. 1989;320(25):1661-6.

17. Katz JM, Pacia SV, Devinsky O. Current Management of Epilepsy and Pregnancy: Fetal Outcome, Congenital Malformations, and Developmental Delay. *Epilepsy Behav.* 2001;2(2):119-23.
18. Koch S, Jager-Roman E, Losche G, Nau H, Rating D, Helge H. Antiepileptic drug treatment in pregnancy: drug side effects in the neonate and neurological outcome. *Acta Paediatr.* 1996;85(6):739-46.
19. Mawer G, Clayton-Smith J, Coyle H, Kini U. Outcome of pregnancy in women attending an outpatient epilepsy clinic: adverse features associated with higher doses of sodium valproate. *Seizure.* 2002;11(8):512-8.
20. Miskov S, Juraski RG, Fucic A, et al. Croatian Pregnant Women with Epilepsy and Effects of Antiepileptic Drugs Exposure in their Offspring - seven years of prospective surveillance. American Epilepsy Society; Texas2010.
21. Miskov S, Juraski RG, Mikula I, et al. The Croatian model of integrative prospective management of epilepsy and pregnancy. *Acta Clin Croat.* 2016;55(4):535-48.
22. Nadebaum C, Anderson VA, Vajda F, Reutens DC, Barton S, Wood AG. Language skills of school-aged children prenatally exposed to antiepileptic drugs. *Neurology.* 2011;76(8):719-26.
23. Rihtman T, Parush S, Ornoy A. Developmental outcomes at preschool age after fetal exposure to valproic acid and lamotrigine: cognitive, motor, sensory and behavioral function. *Reprod Toxicol.* 2013;41:115-25.
24. Scolnik D, Nulman I, Rovet J, et al. Neurodevelopment of children exposed in utero to phenytoin and carbamazepine monotherapy. *JAMA.* 1994;271(10):767-70.
25. Shankaran S, Woldt E, Nelson J, Bedard M, Delaney-Black V. Antenatal phenobarbital therapy and neonatal outcome. II: Neurodevelopmental outcome at 36 months. *Pediatrics.* 1996;97(5):649-52.
26. van der Pol MC, Hadders-Algra M, Huisjes HJ, Touwen BC. Antiepileptic medication in pregnancy: late effects on the children's central nervous system development. *Am J Obstet Gynecol.* 1991;164(1 Pt 1):121-8.
27. Veiby G, Daltveit AK, Schjolberg S, et al. Exposure to antiepileptic drugs in utero and child development: a prospective population-based study. *Epilepsia.* 2013;54(8):1462-72.
28. Veiby G, Engelsen BA, Gilhus NE. Early child development and exposure to antiepileptic drugs prenatally and through breastfeeding: a prospective cohort study on children of women with epilepsy. *JAMA Neurol.* 2013;70(11):1367-74.
29. Wood AG, Nadebaum C, Anderson V, et al. Prospective assessment of autism traits in children exposed to antiepileptic drugs during pregnancy. *Epilepsia.* 2015;56(7):1047-55.
30. Bromley RL, Mawer G, Clayton-Smith J, Baker GA. Autism spectrum disorders following in utero exposure to antiepileptic drugs. *Neurology.* 2008;71(23):1923-4.
31. Gaily EK, Granstrom ML, Hiilesmaa VK, Bardy AH. Head circumference in children of epileptic mothers: contributions of drug exposure and genetic background. *Epilepsy Res.* 1990;5(3):217-22.
32. Hiilesmaa V. A prospective study on maternal and fetal outcome in 139 women with epilepsy. Helsinki: University of Helsinki; 1982.
33. Hiilesmaa VK, Bardy A, Teramo K. Obstetric outcome in women with epilepsy. *Am J Obstet Gynecol.* 1985;152(5):499-504.
34. Rasalam AD, Hailey H, Williams JH, et al. Characteristics of fetal anticonvulsant syndrome associated autistic disorder. *Dev Med Child Neurol.* 2005;47(8):551-5.

- 1  
2  
3 35. Tomson T, Battino D, Bonizzoni E, et al. Antiepileptic drugs and intrauterine death: A  
4 prospective observational study from EURAP. *Neurology*. 2015;85(7):580-8.  
5  
6 36. Viinikainen K, Eriksson K, Monkkonen A, et al. The effects of valproate exposure in  
7 utero on behavior and the need for educational support in school-aged children. *Epilepsy Behav*.  
8 2006;9(4):636-40.  
9  
10 37. Vinten J, Adab N, Kini U, Gorry J, Gregg J, Baker GA. Neuropsychological effects of  
11 exposure to anticonvulsant medication in utero. *Neurology*. 2005;64(6):949-54.  
12  
13 38. Vinten J, Bromley RL, Taylor J, Adab N, Kini U, Baker GA. The behavioral  
14 consequences of exposure to antiepileptic drugs in utero. *Epilepsy Behav*. 2009;14(1):197-201.  
15  
16  
17  
18  
19  
20  
21  
22  
23  
24  
25  
26  
27  
28  
29  
30  
31  
32  
33  
34  
35  
36  
37  
38  
39  
40  
41  
42  
43  
44  
45  
46  
47  
48  
49  
50  
51  
52  
53  
54  
55  
56  
57  
58  
59  
60

For peer review only

## Appendix C. Key excluded studies

| Author, Year                   | Research Group                                                                             | Title                                                                                                                   | Reason for Exclusion                           |
|--------------------------------|--------------------------------------------------------------------------------------------|-------------------------------------------------------------------------------------------------------------------------|------------------------------------------------|
| Meador, 2009 <sup>39</sup>     | Neurodevelopmental Effects of Antiepileptic Drug (NEAD) Study Group                        | Cognitive Function at 3 Years of Age after Fetal Exposure to Antiepileptic Drugs                                        | Outcomes only reported as continuous variables |
| Meador, 2010 <sup>40</sup>     | Neurodevelopmental Effects of Antiepileptic Drug (NEAD) Study Group                        | Effects of breastfeeding in children of women taking antiepileptic drugs                                                | Outcomes only reported as continuous variables |
| Meador, 2011 <sup>41</sup>     | Neurodevelopmental Effects of Antiepileptic Drug (NEAD) Study Group                        | Foetal antiepileptic drug exposure and verbal versus non-verbal abilities at three years of age                         | Outcomes only reported as continuous variables |
| Meador, 2012 <sup>42</sup>     | Neurodevelopmental Effects of Antiepileptic Drug (NEAD) Study Group                        | Effects of fetal antiepileptic drug exposure: Outcomes at age 4.5 years                                                 | Outcomes only reported as continuous variables |
| Meador, 2013 <sup>43</sup>     | Neurodevelopmental Effects of Antiepileptic Drug (NEAD) Study Group                        | Fetal antiepileptic drug exposure and cognitive outcomes at age 6 years (NEAD study): a prospective observational study | Outcomes only reported as continuous variables |
| Shallcross, 2011 <sup>44</sup> | Liverpool and Manchester Neurodevelopment Group and The UK Epilepsy and Pregnancy Register | Child development following in utero exposure: Levetiracetam vs. sodium valproate                                       | Outcomes only reported as continuous variables |
| Shallcross, 2014 <sup>45</sup> | Liverpool and Manchester                                                                   | In utero exposure to levetiracetam vs. valproate: Development and language at 3 years of age                            | Outcomes only reported as continuous variables |

|  |                                                                            |  |  |
|--|----------------------------------------------------------------------------|--|--|
|  | Neurodevelopment<br>Group and The UK<br>Epilepsy and Pregnancy<br>Register |  |  |
|--|----------------------------------------------------------------------------|--|--|

## References

39. Meador KJ, Baker GA, Browning N, et al. Cognitive function at 3 years of age after fetal exposure to antiepileptic drugs. *N Engl J Med*. 2009;360(16):1597-605.
40. Meador KJ, Baker GA, Browning N, et al. Effects of breastfeeding in children of women taking antiepileptic drugs. *Neurology*. 2010;75(22):1954-60.
41. Meador KJ, Baker GA, Browning N, et al. Foetal antiepileptic drug exposure and verbal versus non-verbal abilities at three years of age. *Brain*. 2011;134(Pt 2):396-404.
42. Meador KJ, Baker GA, Browning N, et al. Effects of fetal antiepileptic drug exposure: outcomes at age 4.5 years. *Neurology*. 2012;78(16):1207-14.
43. Meador KJ, Baker GA, Browning N, et al. Fetal antiepileptic drug exposure and cognitive outcomes at age 6 years (NEAD study): a prospective observational study. *Lancet Neurol*. 2013;12(3):244-52.
44. Shallcross R, Bromley RL, Irwin B, Bonnett LJ, Morrow J, Baker GA. Child development following in utero exposure: levetiracetam vs sodium valproate. *Neurology*. 2011;76(4):383-9.
45. Shallcross R, Bromley RL, Cheyne CP, et al. In utero exposure to levetiracetam vs valproate: development and language at 3 years of age. *Neurology*. 2014;82(3):213-21.
46. Cohen MJ, Meador KJ, Browning N, et al. Fetal antiepileptic drug exposure: Adaptive and emotional/behavioral functioning at age 6 years. *Epilepsy Behav*. 2013;29(2):308-15.

## Appendix D. Table of Individual Study characteristics

| Author, Year                                                                              | Country of conduct | Registry or Setting                                                                                                                    | Study period | Interventions                        | Outcomes                                                       | Funding                |
|-------------------------------------------------------------------------------------------|--------------------|----------------------------------------------------------------------------------------------------------------------------------------|--------------|--------------------------------------|----------------------------------------------------------------|------------------------|
| Adab, 2004 <sup>*1</sup><br>[CR: Vinten 2005 <sup>37</sup> , Vinten, 2009 <sup>38</sup> ] | UK                 | Mersey Regional Epilepsy Clinic; Epilepsy Clinic at the Manchester Royal Infirmary; Antenatal clinic at St Mary's Hospital, Manchester | 2000-2001    | Carbam, Control, Valpro              | Cognitive Developmental Delay, Psychomotor Developmental Delay | NR                     |
| Arkilo, 2015 <sup>2</sup>                                                                 | USA                | Minnesota Epilepsy Group                                                                                                               | 2006-2011    | Carbam, Lamot, Levet, Pheny, Valpro  | Autism/Dyspraxia, Psychomotor Developmental Delay              | NR                     |
| Bromley, 2010 <sup>3</sup>                                                                | UK                 | Liverpool and Manchester Neurodevelopment Group                                                                                        | NR           | Carbam, Valpro                       | Language Delay                                                 | NR                     |
| Bromley, 2013 <sup>5</sup><br>[CR: Bromley, 2008 <sup>30</sup> ]                          | UK                 | Liverpool and Manchester Neurodevelopment group                                                                                        | 2000-2004    | Carbam, Control, Lamot, Valpro       | Autism/Dyspraxia, ADHD                                         | mixed public & private |
| Bromley, 2016 <sup>4†</sup>                                                               | UK                 | UK Epilepsy and Pregnancy Register                                                                                                     | 2004-2007    | Control, Gabap, Levet, Topir, Valpro | Cognitive Developmental Delay                                  | public                 |
| Christensen, 2013 <sup>6†</sup>                                                           | Denmark            | Danish Civil Registration System; Danish Prescription Register; Danish Psychiatric Central Register; Danish                            | 1996-2006    | Carbam, Clonaz, Lamot, Oxcar, Valpro | Autism/Dyspraxia                                               | public                 |

|                                                                      |                  |                                                                                             |           |                                                                                                                            |                                                                |        |
|----------------------------------------------------------------------|------------------|---------------------------------------------------------------------------------------------|-----------|----------------------------------------------------------------------------------------------------------------------------|----------------------------------------------------------------|--------|
|                                                                      |                  | Birth Register; Danish National Hospital Register                                           |           |                                                                                                                            |                                                                |        |
| Cohen, 2013 <sup>46</sup>                                            | USA;UK           | Neurodevelopmental Effects of Antiepileptic Drugs Study Group                               | 1999-2004 | Carbam, Lamot, Pheny, Valpro,                                                                                              | ADHD                                                           | public |
| Cummings, 2011 <sup>8†</sup> [CR: Tomson, 2015 <sup>35</sup> ]       | Northern Ireland | UK Epilepsy and Pregnancy Register (Northern Ireland); Northern Ireland Child Health System | 1996-2005 | Carbam, Lamot, Valpro,                                                                                                     | Cognitive Developmental Delay                                  | public |
| Dean, 2002 <sup>9</sup> [CR: Rasalam, 2005 <sup>34</sup> ]           | Scotland         | Aberdeen Maternity Hospital                                                                 | 1976-2000 | Carbam, Carbam+Pheno, Carbam+Pheny, Carbam+Valpro, Control, Ethos, Pheno, Pheno+Pheny, Pheno+Valpro, Pheny, Primid, Valpro | Psychomotor Developmental Delay, ADHD                          | NR     |
| D'Souza, 1991 <sup>10</sup>                                          | United Kingdom   | St Mary's Hospital                                                                          | 1980-1982 | Carbam, Control, Pheno, Pheny, Valpro                                                                                      | Cognitive Developmental Delay                                  | public |
| Eriksson, 2005 <sup>11†</sup> [CR: Viinikainen, 2006 <sup>36</sup> ] | Finland          | Kuopio University Hospital                                                                  | 1989-2000 | Carbam, Control, Valpro                                                                                                    | Cognitive Developmental Delay, Psychomotor Developmental Delay | public |

|    |                             |         |                        |       |                             |                |          |
|----|-----------------------------|---------|------------------------|-------|-----------------------------|----------------|----------|
| 1  |                             |         |                        |       |                             |                |          |
| 2  |                             |         |                        |       |                             |                |          |
| 3  |                             |         |                        |       |                             |                |          |
| 4  | Gaily, 1990 <sup>12</sup>   |         |                        |       | Carbam,                     | Cognitive      |          |
| 5  | [CR: Gaily,                 |         |                        |       | Carbam+Pheno+Pheny,         | Developmental  |          |
| 6  | 1990 <sup>31</sup> ;        | Finland | Helsinki University    | 1975- | Carbam+Pheny,               | Delay ,        | mixed    |
| 7  | Hiilesmaa,                  |         | Central Hospital       | 1979  | Carbam+Valpro, Control,     | Psychomotor    | public & |
| 8  | 1982 <sup>32</sup> ;        |         |                        |       | Ethos+Pheny, Pheno+Pheny,   | Developmental  | private  |
| 9  | Hiilesmaa,                  |         |                        |       | Pheny, Pheny+Primid,        | Delay          |          |
| 10 | 1985 <sup>33</sup> ]        |         |                        |       | Pheny+Valpro                |                |          |
| 11 |                             |         |                        |       |                             |                |          |
| 12 |                             |         |                        |       |                             |                |          |
| 13 |                             |         |                        |       |                             |                |          |
| 14 | Gogatishvili,               | Georgia | Georgian National AED- | NR    | Carbam, Lamot, Valpro       | Cognitive      | public   |
| 15 | 2014 <sup>13</sup>          |         | Pregnancy Registry     |       |                             | Developmental  |          |
| 16 |                             |         |                        |       |                             | Delay          |          |
| 17 | Gogatishvili,               | Georgia | Georgian National AED- | NR    | Carbam, Carbam+Levet,       | Language Delay | public   |
| 18 | 2015 <sup>14</sup>          |         | Pregnancy Registry     |       | Lamot, Pheno, Valpro        |                |          |
| 19 |                             |         |                        |       |                             |                |          |
| 20 |                             |         | EFEMERIS database -    |       |                             |                |          |
| 21 |                             |         | Caisse Primaire        |       |                             |                |          |
| 22 |                             |         | d'Assurance Maladie of |       |                             |                |          |
| 23 | Hurault-                    | France  | Haute-Garonne and      | 2004- | Carbam, Clobaz, Clonaz,     | Psychomotor    | NR       |
| 24 | Delarue, 2012 <sup>15</sup> |         | Maternal and Infant    | 2008  | Gabap, Lamot, Pheno, Topir, | Developmental  |          |
| 25 |                             |         | Protection Service;    |       | Valpro                      | Delay          |          |
| 26 |                             |         | Antenatal Diagnostic   |       |                             |                |          |
| 27 |                             |         | Centre                 |       |                             |                |          |
| 28 |                             |         |                        |       |                             |                |          |
| 29 |                             |         |                        |       |                             |                |          |
| 30 |                             |         |                        |       |                             |                |          |
| 31 |                             |         |                        |       |                             |                |          |
| 32 |                             |         |                        |       |                             | Cognitive      |          |
| 33 |                             |         |                        |       |                             | Developmental  |          |
| 34 | Jones, 1989 <sup>16†</sup>  | US      | California Teratogen   | 1979- | Carbam, Carbam+Pheno,       | Delay ,        | public   |
| 35 |                             |         | Registry               | 1988  | Carbam+Pheno+Valpro,        | Psychomotor    |          |
| 36 |                             |         |                        |       | Carbam+Primid               | Developmental  |          |
| 37 |                             |         |                        |       |                             | Delay          |          |
| 38 |                             |         |                        |       |                             |                |          |
| 39 | Katz, 2001 <sup>17</sup>    | USA     | Mount Sinai            | 1990- | Carbam, Control, Lamot,     | Cognitive      | NR       |
| 40 |                             |         | Comprehensive Epilepsy | 2000  | Pheno, Pheny, Primid,       | Developmental  |          |
| 41 |                             |         | Center                 |       | Valpro                      | Delay          |          |
| 42 |                             |         |                        |       |                             |                |          |
| 43 |                             |         |                        |       |                             |                |          |
| 44 |                             |         |                        |       |                             |                |          |
| 45 |                             |         |                        |       |                             |                |          |
| 46 |                             |         |                        |       |                             |                |          |
| 47 |                             |         |                        |       |                             |                |          |
| 48 |                             |         |                        |       |                             |                |          |
| 49 |                             |         |                        |       |                             |                |          |



|                                                    |                               |           |                                                                                                                        |           |                                                                                                                                         |                                                    |                        |
|----------------------------------------------------|-------------------------------|-----------|------------------------------------------------------------------------------------------------------------------------|-----------|-----------------------------------------------------------------------------------------------------------------------------------------|----------------------------------------------------|------------------------|
| 1<br>2<br>3<br>4<br>5<br>6<br>7                    | Koch, 1996 <sup>18</sup>      | Germany   | NR                                                                                                                     | 1976-1983 | Pheno, Pheny, Primid, Valpro                                                                                                            | Cognitive Developmental Delay                      | public                 |
| 8<br>9<br>10<br>11                                 | Mawer, 2002 <sup>19</sup>     | England   | Manchester Royal Infirmary                                                                                             | 1990-1999 | Carbam, Lamot, Pheny, Valpro                                                                                                            | Cognitive Developmental Delay                      | NR                     |
| 12<br>13<br>14<br>15<br>16<br>17                   | Miskov, 2010 <sup>20</sup>    | Croatia   | NR                                                                                                                     | 2003-2010 | Carbam, Control, Gabap, Lamot, Valpro                                                                                                   | Psychomotor Developmental Delay, Neonatal Seizures | NR                     |
| 18<br>19<br>20<br>21<br>22<br>23<br>24<br>25<br>26 | Miskov, 2016 <sup>21</sup>    | Croatia   | Sestre milosrdnice University Hospital Center                                                                          | 2003-2013 | Carbam, Carbam+Lamot, Carbam+Pheno, Carbam+Pheny+Topir, Control, Clonaz+Valpro, Gabap, Lamot, Oxcar, Pheno, Pheny, Topir+Valpro, Valpro | Attention Deficit Hyperactivity Disorder           | NR                     |
| 27<br>28<br>29<br>30                               | Nadebaum, 2011 <sup>22†</sup> | Australia | Australian Registry of Antiepileptic Drug Use in Pregnancy                                                             | 2007-2009 | Carbam, Lamot, Valpro                                                                                                                   | Language Delay                                     | mixed public & private |
| 31<br>32<br>33<br>34                               | Rihtman, 2013 <sup>23</sup>   | Israel    | Israeli Teratogen Information Service                                                                                  | NR        | Lamot, Valpro                                                                                                                           | Neonatal Seizure                                   | mixed public & private |
| 35<br>36<br>37<br>38<br>39<br>40<br>41<br>42<br>43 | Scolnik, 1994 <sup>24</sup>   | Canada    | Hospital for Sick Children - Motherisk Program; North York General Hospital; Toronto Hospital; Oshawa General Hospital | 1987-1992 | Carbam, Pheny                                                                                                                           | Cognitive Developmental Delay                      | public                 |

1  
2  
3  
4  
5  
6  
7  
8  
9  
10  
11  
12  
13  
14  
15  
16  
17  
18  
19  
20  
21  
22  
23  
24  
25  
26  
27  
28  
29  
30  
31  
32  
33  
34  
35  
36  
37  
38  
39  
40  
41  
42  
43  
44  
45  
46  
47  
48  
49

|                                 |             |                                                                     |           |                                                                         |                                                                         |        |
|---------------------------------|-------------|---------------------------------------------------------------------|-----------|-------------------------------------------------------------------------|-------------------------------------------------------------------------|--------|
| Shankaran, 1996 <sup>25</sup>   | USA         | Children's Hospital of Michigan                                     | NR        | Control, Pheno                                                          | Psychomotor Developmental Delay, Language Delay                         | public |
| Van der Pol, 1991 <sup>26</sup> | Netherlands | Groningen University Hospital                                       | 1973-1981 | Carbam, Carbam+Pheno, Control, Pheno                                    | Psychomotor Developmental Delay                                         | public |
| Veiby, 2013a <sup>27</sup> †    | Norway      | Norwegian Institute of Public Health- Mother and Child Cohort Study | 1999-2009 | Carbam, Control, Lamot, Valpro                                          | Social Impairment                                                       | public |
| Veiby, 2013b <sup>28</sup> †    | Norway      | Medical Birth Registry of Norway                                    | 1999-2008 | Carbam, Control, Lamot, Valpro                                          | Psychomotor Developmental Delay, Autism/Dyspraxia, Language Delay, ADHD | public |
| Wood, 2015 <sup>29</sup> †      | Australia   | Australian Registry of Antiepileptic Drug Use in Pregnancy          | 2007-2010 | Carbam, Carbam+Clonaz, Carbam+Lamot, Carbam+Pheny, Lamot+Valpro, Valpro | Autism/Dyspraxia                                                        | public |

**Abbreviations:** ADHD – Attention Deficit Hyperactivity Disorder; NR – Not Reported

Carbam = Carbamazepine; Clobaz = Clobazam; Clonaz = Clonazepam; Ethos = Ethosuximide; Gabap = Gabapentin; Lamot = Lamotrigine; Levet = Levetiracetam; Oxcar = Oxcarbazepine; Pheno = Phenobarbital; Pheny = Phenytoin; Primid = Primidone; Topir = Topiramate; Valpro = Valproate; Vigab = Viagabatratin

\*Single publication reporting on two separate cohorts

†Registry Studies

## Appendix E. Table of Patient characteristics

| Author, Year                                                                                   | Indication | Sample Size* | Mean Age (Women) | Mean Age (Children)/ Follow-up period† | AED Exposure Timing                | Maternal Alcohol Use n/N‡ | Maternal Tobacco Use n/N‡ |
|------------------------------------------------------------------------------------------------|------------|--------------|------------------|----------------------------------------|------------------------------------|---------------------------|---------------------------|
| Adab, 2004a <sup>1</sup> §<br>[CR: Vinten 2005 <sup>37</sup> ;<br>Vinten, 2009 <sup>38</sup> ] | Epilepsy   | 177          | 26.1             | 9-10.5                                 | NR                                 | 24/279‡                   | 68/249‡                   |
| Adab, 2004b <sup>1</sup> §<br>[CR: Vinten 2005 <sup>37</sup> ;<br>Vinten, 2009 <sup>38</sup> ] | Epilepsy   | 81           | 26.1             | 3-3.33                                 | NR                                 | 24/279‡                   | 68/249‡                   |
| Arkilo, 2015 <sup>2</sup>                                                                      | Epilepsy   | 59           | NR               | NA                                     | First trimester                    | NR                        | NR                        |
| Bromley, 2010 <sup>3</sup>                                                                     | NR         | 60           | NR               | 6-7                                    | Whole pregnancy                    | NR                        | NR                        |
| Bromley, 2013 <sup>5</sup><br>[CR: Bromley, 2008 <sup>30</sup> ]                               | Epilepsy   | 156          | 28               | 6                                      | NR                                 | 28/156                    | 42/156                    |
| Bromley, 2016 <sup>4</sup>                                                                     | Epilepsy   | 185          | NR               | NR                                     | NR                                 | 31/185                    | 35/185                    |
| Christensen, 2013 <sup>6</sup>                                                                 | NR         | 2011         | NR               | NR                                     | Whole pregnancy                    | NR                        | NR                        |
| Cohen, 2013 <sup>46</sup>                                                                      | Epilepsy   | 108          | 30               | 6                                      | During pregnancy and breastfeeding | 12/192‡                   | NR                        |
| Cummings, 2011 <sup>8</sup><br>[CR: Tomson, 2015 <sup>35</sup> ]                               | Epilepsy   | 142          | NR               | 2-3                                    | During pregnancy and breastfeeding | 32/108‡                   | 19/108‡                   |
| Dean, 2002 <sup>9</sup><br>[CR: Rasalam, 2005 <sup>34</sup> ]                                  | Epilepsy   | 287          | 27               | 3.75-15.5                              | First trimester                    | NR                        | NR                        |
| D'Souza, 1991 <sup>10</sup>                                                                    | Epilepsy   | 42           | 26.5             | 2.5-3.5                                | Whole pregnancy                    | NR                        | NR                        |
| Eriksson, 2005 <sup>11</sup><br>[CR: Viinikainen, 2006 <sup>36</sup> ]                         | Epilepsy   | 39           | 28.2             | NR                                     | NR                                 | NR                        | NR                        |

|                                                                                                                                   |          |     |      |        |                                       |    |         |
|-----------------------------------------------------------------------------------------------------------------------------------|----------|-----|------|--------|---------------------------------------|----|---------|
| Gaily, 1990 <sup>12</sup><br>[CR: Gaily, 1990 <sup>31</sup> ;<br>Hiilesmaa, 1982 <sup>32</sup> ;<br>Hiilesmaa, 1985 <sup>33</sup> | Epilepsy | 134 | 27.8 | 5.5    | First trimester                       | NR | NR      |
| Gogatishvili, 2014 <sup>13</sup>                                                                                                  | NR       | 39  | NR   | 2 to 4 | NR                                    | NR | NR      |
| Gogatishvili, 2015 <sup>14</sup>                                                                                                  | NR       | 23  | NR   | 3 to 6 | NR                                    | NR | NR      |
| Hurault-Delarue, 2012 <sup>15</sup>                                                                                               | NR       | 109 | NR   | 0.75   | NR                                    | NR | NR      |
| Jones, 1989 <sup>16</sup>                                                                                                         | Epilepsy | 63  | NR   | NR     | Whole pregnancy                       | NR | NR      |
| Katz, 2001 <sup>17</sup>                                                                                                          | Epilepsy | 51  | 31   | NR     | NR                                    | NR | NR      |
| Koch, 1996 <sup>18</sup>                                                                                                          | Epilepsy | 40  | NR   | 6      | First trimester                       | NR | NR      |
| Mawer, 2002 <sup>19</sup>                                                                                                         | Epilepsy | 52  | NR   | NR     | NR                                    | NR | NR      |
| Miskov, 2010 <sup>20</sup>                                                                                                        | Epilepsy | 55  | NR   | NR     | NR                                    | NR | NR      |
| Miskov, 2016 <sup>21</sup>                                                                                                        | Epilepsy | 74  | 34   | NR     | NR                                    | NR | 6/74    |
| Nadebaum, 2011 <sup>22</sup>                                                                                                      | Epilepsy | 66  | 31.6 | 7.4    | During pregnancy<br>and breastfeeding | NR | 5/66    |
| Rihtman, 2013 <sup>23</sup>                                                                                                       | Epilepsy | 72  | NR   | NR     | During pregnancy<br>and breastfeeding | NR | NR      |
| Scolnik, 1994 <sup>24</sup>                                                                                                       | Epilepsy | 75  | NR   | 1.5-3  | 1st trimester                         | NR | NR      |
| Shankaran, 1996 <sup>25</sup>                                                                                                     | NR       | 96  | NR   | NR     | NR                                    | NR | NR      |
| Van der Pol, 1991 <sup>26</sup>                                                                                                   | Epilepsy | 57  | NR   | 6-13   | NR                                    | NR | NR      |
| Veiby, 2013a <sup>27</sup>                                                                                                        | Epilepsy | 422 | NR   | 0.5    | During pregnancy<br>and breastfeeding | NR | NR      |
| Veiby, 2013b <sup>28</sup>                                                                                                        | Epilepsy | 248 | 28.9 | 3      | NR                                    | NR | 68/726‡ |
| Wood, 2015 <sup>29</sup>                                                                                                          | Epilepsy | 77  | NR   | 6-8    | NR                                    | NR | NR      |

**Abbreviations:** NA – Not applicable; NR – Not reported

\* Sample size used for analysis; ineligible treatment arms (i.e. treatment arms with excluded drugs or unspecified polytherapy) are not included in the count

† The mean age for children/follow-up period data were only collected for outcomes related to cognitive and/or psychomotor development

‡ Total sample size is based on the number of women enrolled in the study; may differ from the sample size used for analysis

§ Single publication reporting on two separate cohorts

## Appendix F. Methodological quality of observational studies – Newcastle Ottawa Scale results

| First Author, Year               | Representativeness of the exposed cohort | Selection of the non-exposed cohort | Ascertainment of exposure | Demonstration that outcome of interest was not present at start of study | Comparability of cohorts on the basis of the design or analysis | Assessment of outcome | Was follow-up long enough for outcomes to occur | Adequacy of follow up of cohorts |
|----------------------------------|------------------------------------------|-------------------------------------|---------------------------|--------------------------------------------------------------------------|-----------------------------------------------------------------|-----------------------|-------------------------------------------------|----------------------------------|
| Adab, 2004 <sup>1</sup>          | B                                        | A                                   | A                         | A                                                                        | C                                                               | A                     | A                                               | C                                |
| Arkilo, 2015 <sup>2</sup>        | B                                        | A                                   | B                         | A                                                                        | D                                                               | A                     | A                                               | C                                |
| Bromley, 2010 <sup>3</sup>       | D                                        | A                                   | D                         | A                                                                        | D                                                               | D                     | B                                               | D                                |
| Bromley, 2013 <sup>5</sup>       | A                                        | A                                   | A                         | A                                                                        | A                                                               | A                     | A                                               | C                                |
| Bromley, 2016 <sup>4</sup>       | A                                        | A                                   | A                         | A                                                                        | A                                                               | A                     | A                                               | C                                |
| Christensen, 2013 <sup>6</sup>   | A                                        | A                                   | A                         | A                                                                        | A                                                               | B                     | A                                               | B                                |
| Cohen, 2013 <sup>46</sup>        | A                                        | A                                   | D                         | A                                                                        | A                                                               | A                     | A                                               | C                                |
| Cummings, 2011 <sup>8</sup>      | A                                        | A                                   | A                         | A                                                                        | A                                                               | A                     | A                                               | C                                |
| Dean, 2002 <sup>9</sup>          | B                                        | A                                   | A                         | A                                                                        | D                                                               | A                     | A                                               | C                                |
| D'Souza, 1991 <sup>10</sup>      | B                                        | A                                   | A                         | A                                                                        | D                                                               | A                     | A                                               | A                                |
| Eriksson, 2005 <sup>11</sup>     | B                                        | A                                   | A                         | A                                                                        | B                                                               | A                     | A                                               | D                                |
| Gaily, 1990 <sup>12</sup>        | B                                        | A                                   | A                         | A                                                                        | D                                                               | A                     | A                                               | A                                |
| Gogatishvili, 2014 <sup>13</sup> | A                                        | A                                   | D                         | A                                                                        | D                                                               | A                     | A                                               | D                                |
| Gogatishvili, 2015 <sup>14</sup> | A                                        | A                                   | D                         | A                                                                        | D                                                               | A                     | A                                               | D                                |

|    |                           |   |   |   |   |   |   |   |   |
|----|---------------------------|---|---|---|---|---|---|---|---|
| 1  |                           |   |   |   |   |   |   |   |   |
| 2  |                           |   |   |   |   |   |   |   |   |
| 3  |                           |   |   |   |   |   |   |   |   |
| 4  | Hurault-                  |   |   |   |   |   |   |   |   |
| 5  | Delarue,                  | A | A | A | A | A | A | A | A |
| 6  | 2012 <sup>15</sup>        |   |   |   |   |   |   |   |   |
| 7  | Jones, 1989 <sup>16</sup> | A | A | B | A | D | A | A | B |
| 8  | Katz, 2001 <sup>17</sup>  | B | A | A | A | D | A | A | D |
| 9  | Koch, 1996 <sup>18</sup>  | B | A | B | A | D | A | A | C |
| 10 | Mawer,                    |   |   |   |   |   |   |   |   |
| 11 | 2002 <sup>19</sup>        | B | A | A | A | D | A | A | B |
| 12 | Miskov,                   |   |   |   |   |   |   |   |   |
| 13 | 2010 <sup>20</sup>        | D | A | D | A | D | D | A | D |
| 14 | Miskov,                   |   |   |   |   |   |   |   |   |
| 15 | 2016 <sup>21</sup>        | C | A | A | A | D | A | A | D |
| 16 | Nadebaum,                 |   |   |   |   |   |   |   |   |
| 17 | 2011 <sup>22</sup>        | A | A | A | A | A | A | A | B |
| 18 | Rihtman,                  |   |   |   |   |   |   |   |   |
| 19 | 2013 <sup>23</sup>        | A | B | A | A | A | A | A | C |
| 20 | Scolnik,                  |   |   |   |   |   |   |   |   |
| 21 | 1994 <sup>24</sup>        | B | A | A | A | D | A | A | A |
| 22 | Shankaran,                |   |   |   |   |   |   |   |   |
| 23 | 1996 <sup>25</sup>        | B | A | A | A | D | A | A | B |
| 24 | Van der Pol,              |   |   |   |   |   |   |   |   |
| 25 | 1991 <sup>26</sup>        | B | A | D | A | A | A | A | B |
| 26 | Veiby,                    |   |   |   |   |   |   |   |   |
| 27 | 2013a <sup>27</sup>       | A | A | A | A | A | A | A | D |
| 28 | Veiby,                    |   |   |   |   |   |   |   |   |
| 29 | 2013b <sup>28</sup>       | A | A | A | A | A | A | A | C |
| 30 | Wood, 2015 <sup>29</sup>  | A | A | A | A | D | A | A | C |

**Abbreviations:** A – low risk; B – moderate risk; C – high risk; D – unclear risk

Appendix G. Comparison-adjusted funnel plots\*

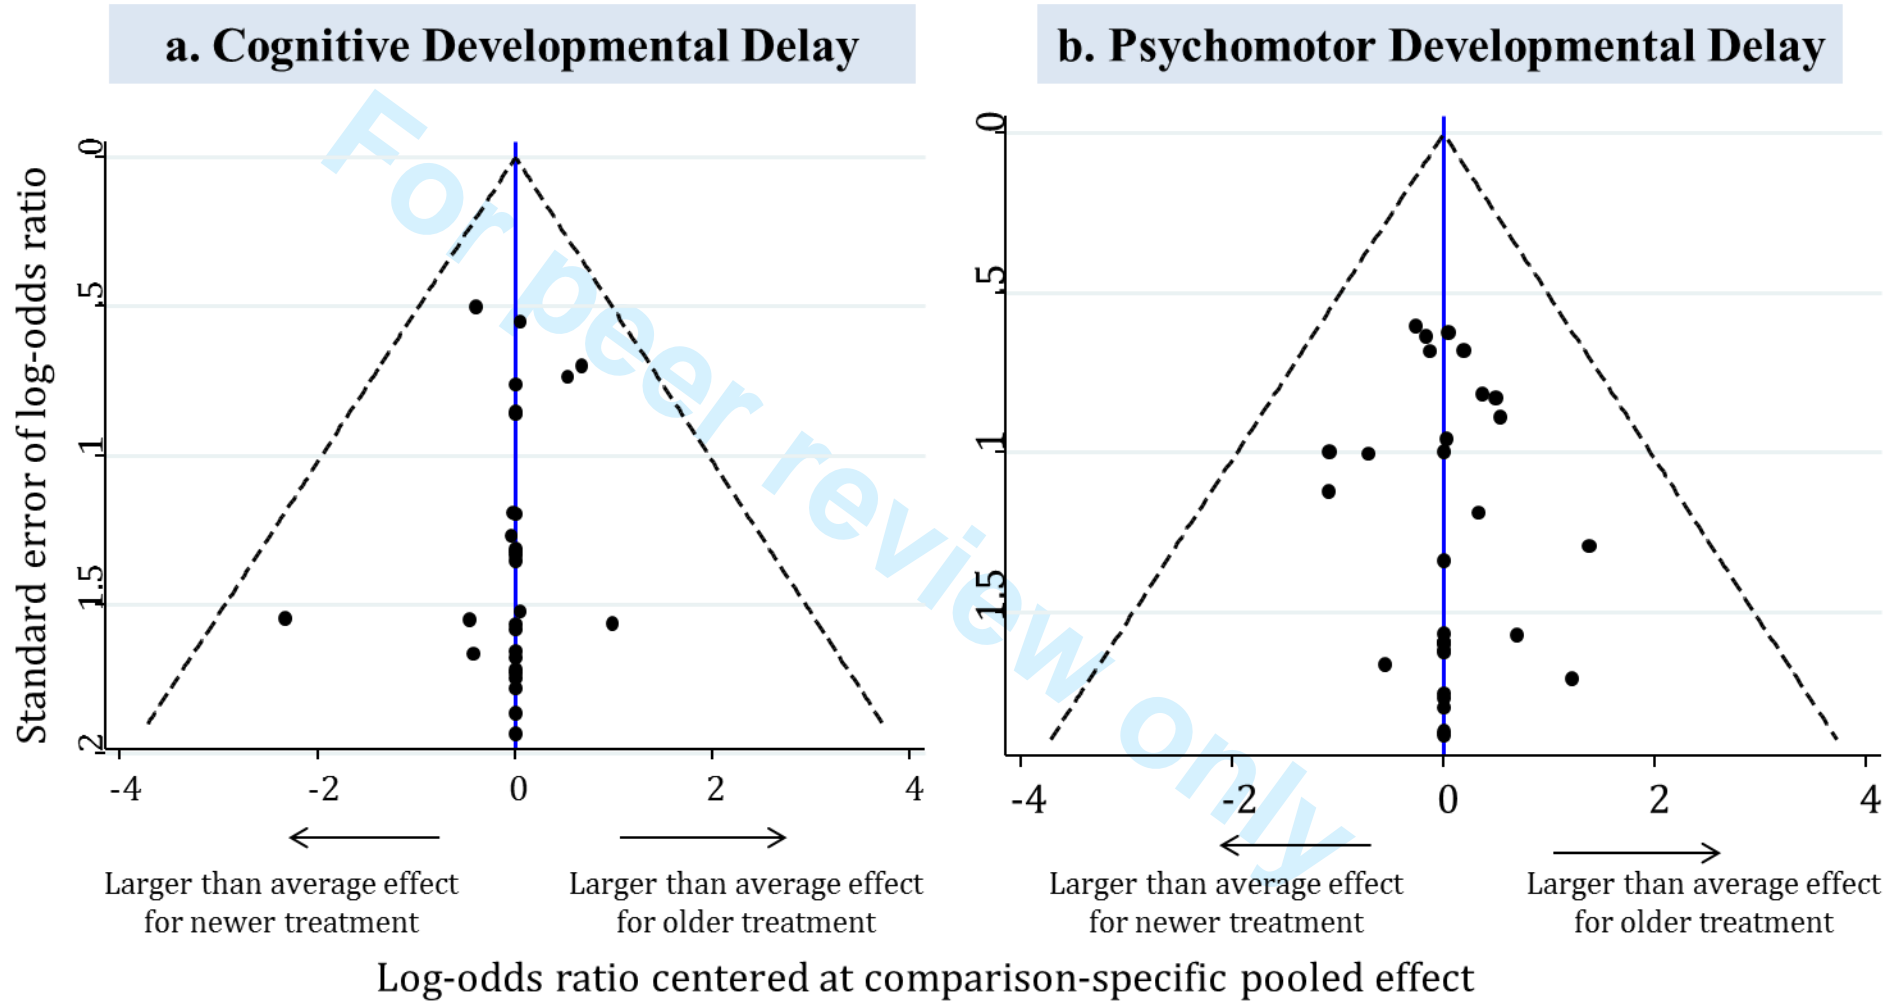

\* Funnel plots have been produced only for outcomes with  $\geq 10$  studies. For multi-arm studies we plot data points from each study-specific basic parameter (treatment comparisons with a study-specific common comparator)

Appendix H. Statistically significant network meta-analysis results along with meta-analysis results, transitivity, and inconsistency assessments

| Treatment Comparison                                                             | Number of Studies (Mean Baseline Risk) | Number of patients (Mean Age) | Treatment Indication | Timing        | Comparability of cohorts                         | Adequacy of follow up of cohorts | MA Odds Ratio (95% CrI)            | NMA Odds Ratio (95% CrI) (95% PrI) |
|----------------------------------------------------------------------------------|----------------------------------------|-------------------------------|----------------------|---------------|--------------------------------------------------|----------------------------------|------------------------------------|------------------------------------|
| <b>Cognitive Developmental Delay (10 studies, 748 patients, 14 treatments)</b>   |                                        |                               |                      |               |                                                  |                                  |                                    |                                    |
| Lamot vs Valpro                                                                  | 4 (NA)                                 | 140 (31.00)                   | Epilepsy             | NR            | H                                                | H                                | 0.17 (0.02-0.87)                   | 0.13 (0.01-0.57) (0.01-0.75)       |
| Valpro vs Control                                                                | 4 (0.06)                               | 267 (28.80)                   | Epilepsy             | 1st trimester | H                                                | H                                | 8.15 (3.19-22.33)                  | 7.40 (3.00-18.46) (1.81-27.63)     |
| Valpro vs Carbam                                                                 | 6 (NA)                                 | 310 (27.80)                   | Epilepsy             | NR            | H                                                | L                                | 3.32 (1.56-7.04)                   | 3.54 (1.69-7.26) (0.95-12.32)      |
| Valpro vs Pheno                                                                  | 3 (NA)                                 | 36 (27.80)                    | Epilepsy             | 1st trimester | H                                                | L                                | 4.25 (0.82-34.07)                  | 5.59 (1.21-35.07) (0.93-45.99)     |
| Valpro vs Pheny                                                                  | 3 (NA)                                 | 58 (31.00)                    | Epilepsy             | 1st trimester | H                                                | L                                | 3.12 (0.75-14.12)                  | 2.88 (1.04-8.49) (0.69-12.62)      |
| <i>Common between-study variance across treatment comparisons</i>                |                                        |                               |                      |               |                                                  |                                  | 0.13 (0.00-0.97)                   | 0.12 (0.00-1.15) (NA)              |
| Residual deviance: 44.72    Data points: 47    DIC: 78.7                         |                                        |                               |                      |               |                                                  |                                  |                                    |                                    |
| <i>Evaluation of consistency using the design-by-treatment interaction model</i> |                                        |                               |                      |               | Chi-square test: 14.15<br>Degrees of Freedom: 17 |                                  | P- value: 0.66<br>Heterogeneity: 0 |                                    |



| Treatment Comparison                                              | Number of Studies (Mean Baseline Risk) | Number of patients (Mean Age) | Treatment Indication | Timing                                                                    | Comparability of cohorts | Adequacy of follow up of cohorts | MA Odds Ratio (95% CrI)                        | NMA Odds Ratio (95% CrI) (95% PrI)                                       |
|-------------------------------------------------------------------|----------------------------------------|-------------------------------|----------------------|---------------------------------------------------------------------------|--------------------------|----------------------------------|------------------------------------------------|--------------------------------------------------------------------------|
| <b>Autism Dyspraxia (5 studies, 2551 patients, 12 treatments)</b> |                                        |                               |                      |                                                                           |                          |                                  |                                                |                                                                          |
| Lamot vs Control                                                  | 2 (0.00)                               | 254 (27.75)                   | Epilepsy             | 1st trimester                                                             | H                        | H                                | 13.77<br>(2.06-188.00)                         | 8.88<br>(1.29-112.00)<br>(0.94-146.80)                                   |
| Lamot+Valpro vs Carbam                                            | 1 (NA)                                 | 40 (NR)                       | Epilepsy             | NR                                                                        | L                        | L                                | 15.02<br>(2.04-171.90)                         | 22.89<br>(2.58-219.00)<br>(1.90-282.20)                                  |
| Lamot+Valpro vs Clonaz                                            | NA                                     | NR                            | NR                   | NR                                                                        | NR                       | NR                               | NA                                             | 20.21<br>(1.48-351.30)<br>(1.15-455.00)                                  |
| Lamot+Valpro vs Control                                           | NA                                     | NR                            | NR                   | NR                                                                        | NR                       | NR                               | NA                                             | 132.70<br>(7.41-3.9 x 10 <sup>3</sup> )<br>(5.82-4.6 x 10 <sup>3</sup> ) |
| Lamot+Valpro vs Lamot                                             | NA                                     | NR                            | NR                   | NR                                                                        | NR                       | NR                               | NA                                             | 14.61<br>(1.51-149.10)<br>(1.14-196.80)                                  |
| Oxcar vs Control                                                  | NA                                     | NR                            | NR                   | NR                                                                        | NR                       | NR                               | NA                                             | 13.51<br>(1.28-221.40)<br>(0.86-267.40)                                  |
| Valpro vs Carbam                                                  | 5 (NA)                                 | 1003<br>(27.83)               | Epilepsy             | 1st trimester                                                             | L                        | L                                | 3.20<br>(1.20-8.68)                            | 3.02<br>(1.09-8.40)<br>(0.57-14.31)                                      |
| Valpro vs Control                                                 | 2 (0.00)                               | 249 (27.75)                   | Epilepsy             | 1st trimester                                                             | H                        | H                                | 9.19<br>(1.14-132.10)                          | 17.29<br>(2.40-217.60)<br>(1.61-274.90)                                  |
| <i>Common between-study variance across treatment comparisons</i> |                                        |                               |                      |                                                                           |                          |                                  | 0.12<br>(0.00-1.37)                            | 0.16<br>(0.00-1.95)<br>(NA)                                              |
| Residual deviance: 24 Data points: 24 DIC: 44                     |                                        |                               |                      | Evaluation of consistency using the design-by-treatment interaction model |                          |                                  | Chi-square test: 3.79<br>Degrees of Freedom: 5 | P- value: 0.57<br>Heterogeneity: 0                                       |

| Treatment Comparison                                                              | Number of Studies (Mean Baseline Risk) | Number of patients (Mean Age) | Treatment Indication | Timing                                           | Comparability of cohorts | Adequacy of follow up of cohorts | MA Odds Ratio (95% CrI)            | NMA Odds Ratio (95% CrI) (95% PrI)      |
|-----------------------------------------------------------------------------------|----------------------------------------|-------------------------------|----------------------|--------------------------------------------------|--------------------------|----------------------------------|------------------------------------|-----------------------------------------|
| <b>Psychomotor Developmental Delay (11 studies, 1145 patients, 18 treatments)</b> |                                        |                               |                      |                                                  |                          |                                  |                                    |                                         |
| Carbam+Pheno+Valpro vs Control                                                    | NA                                     | NR                            | NR                   | NR                                               | NR                       | NR                               | NA                                 | 19.12<br>(1.49-337.50)<br>(1.34-370.40) |
| Carbam+Pheno+Valpro vs Pheno                                                      | NA                                     | NR                            | NR                   | NR                                               | NR                       | NR                               | NA                                 | 19.86<br>(1.38-393.60)<br>(1.26-423.30) |
| Levet vs Carbam+Pheno+Valpro                                                      | NA                                     | NR                            | NR                   | NR                                               | NR                       | NR                               | NA                                 | 0.01<br>(0.00-0.58)<br>(0.00-0.62)      |
| Valpro vs Carbam                                                                  | 7<br>(NA)                              | 331 (27.80)                   | Epilepsy             | 1st trimester                                    | H                        | H                                | 2.72<br>(1.39-5.67)                | 2.45<br>(1.27-4.88)<br>(0.95-6.77)      |
| Valpro vs Control                                                                 | 5<br>(0.07)                            | 331 (28.38)                   | Epilepsy             | 1st trimester                                    | H                        | H                                | 3.53<br>(1.60-8.64)                | 4.16<br>(2.04-8.75)<br>(1.52-12.05)     |
| Valpro vs Pheno                                                                   | 2<br>(NA)                              | 141 (NR)                      | Epilepsy             | 1st trimester                                    | H                        | H                                | 3.68<br>(1.17-12.30)               | 4.32<br>(1.72-11.20)<br>(1.34-14.51)    |
| <i>Common between-study variance across treatment comparisons</i>                 |                                        |                               |                      |                                                  |                          |                                  | 0.05<br>(0.00-0.49)                | 0.06<br>(0.00-0.63)<br>(NA)             |
| Residual deviance: 45    Data points: 51    DIC: 78                               |                                        |                               |                      |                                                  |                          |                                  |                                    |                                         |
| <i>Evaluation of consistency using the design-by-treatment interaction model</i>  |                                        |                               |                      | Chi-square test: 13.46<br>Degrees of Freedom: 21 |                          |                                  | P- value: 0.89<br>Heterogeneity: 0 |                                         |

| Treatment Comparison                                                                                                                                                                                                                                                                                      | Number of Studies (Mean Baseline Risk) | Number of patients (Mean Age) | Treatment Indication | Timing                                         | Comparability of cohorts | Adequacy of follow up of cohorts | MA Odds Ratio (95% CrI)            | NMA Odds Ratio (95% CrI) (95% PrI)   |
|-----------------------------------------------------------------------------------------------------------------------------------------------------------------------------------------------------------------------------------------------------------------------------------------------------------|----------------------------------------|-------------------------------|----------------------|------------------------------------------------|--------------------------|----------------------------------|------------------------------------|--------------------------------------|
| <b>Language Delay (5 studies, 509 patients, 5 treatments)</b>                                                                                                                                                                                                                                             |                                        |                               |                      |                                                |                          |                                  |                                    |                                      |
| Valpro vs Control                                                                                                                                                                                                                                                                                         | 1<br>(0.03)                            | 173<br>(28.90)                | Epilepsy             | NR                                             | L                        | H                                | 6.96<br>(1.14-37.03)               | 7.95<br>(1.50-49.13)<br>(0.96-74.52) |
| <i>Common between-study variance across treatment comparisons</i>                                                                                                                                                                                                                                         |                                        |                               |                      |                                                |                          |                                  | 0.15<br>(0.00-1.85)                | 0.16<br>(0.00-2.15)<br>(NA)          |
| Residual deviance: 12 Data points: 14 DIC: 23                                                                                                                                                                                                                                                             |                                        |                               |                      |                                                |                          |                                  |                                    |                                      |
| <i>Evaluation of consistency using the design-by-treatment interaction model</i>                                                                                                                                                                                                                          |                                        |                               |                      | Chi-square test: 2.33<br>Degrees of Freedom: 3 |                          |                                  | P- value: 0.50<br>Heterogeneity: 0 |                                      |
| <b>ADHD (4 studies, 750 patients, 6 treatments)</b>                                                                                                                                                                                                                                                       |                                        |                               |                      |                                                |                          |                                  |                                    |                                      |
| <i>No statistically significant results</i>                                                                                                                                                                                                                                                               |                                        |                               |                      |                                                |                          |                                  |                                    |                                      |
| Residual deviance: 12 Data points: 17 DIC: 22                                                                                                                                                                                                                                                             |                                        |                               |                      |                                                |                          |                                  |                                    |                                      |
| <b>Abbreviations:</b> ADHD - Attention Deficit Hyperactivity Disorder; CrI - Credible Interval; DIC - Deviance Information Criterion; H- high risk of bias; L - low risk of bias; MA - Meta-analysis; NA - Not applicable; NMA - Network Meta-analysis; NR- Not Reported; PrI - Predictive Interval       |                                        |                               |                      |                                                |                          |                                  |                                    |                                      |
| Carbam = Carbamazepine; Clobaz = Clobazam; Clonaz = Clonazepam; Ethos = Ethosuximide; Gabap = Gabapentin; Lamot = Lamotrigine; Levet = Levetiracetam; Oxcar = Oxcarbazepine; Pheno = Phenobarbital; Pheny = Phenytoin; Pridmid = Primidone; Topir = Topiramate; Valpro = Valproate; Vigab = Viagabatratin |                                        |                               |                      |                                                |                          |                                  |                                    |                                      |

1  
2  
3  
4  
5  
6  
7  
8  
9  
10  
11  
12  
13  
14  
15  
16  
17  
18  
19  
20  
21  
22  
23  
24  
25  
26  
27  
28  
29  
30  
31  
32  
33  
34  
35  
36  
37  
38  
39  
40  
41  
42  
43  
44  
45  
46  
47  
48  
49

### Appendix I. Rank-heat plot of cognitive developmental delay, autism/dyspraxia, psychomotor developmental delay, language delay, and attention deficit hyperactivity disorder outcomes\*

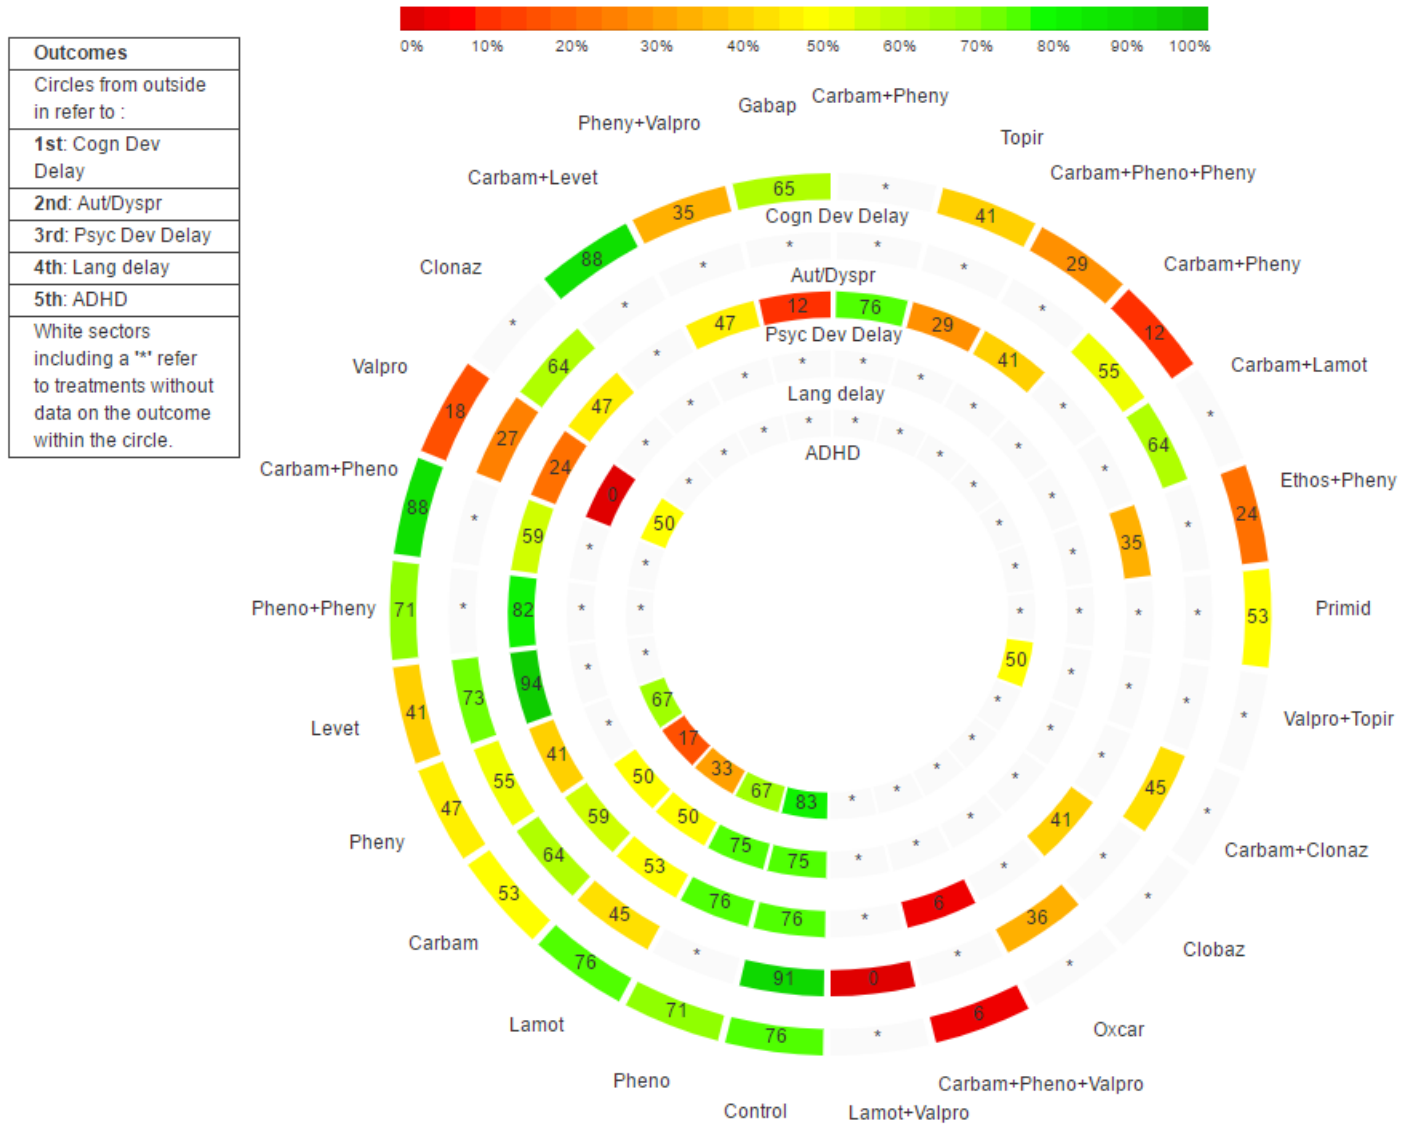

1  
2  
3 **Abbreviations:** carbam - carbamazepine, clobaz - clobazam, clonaz - clonazepam, ethos - ethosuximide, gabap - gabapentin, lamot - lamotrigine, levet -  
4 levetiracetam, oxcar - oxcarbazepine, pheno - phenobarbital, pheny - phenytoin, primid - primidone, topir - topiramate, valpro - valproate, vigab - vigabatrin  
5

6 \*Rank-heat plot of cognitive developmental delay, autism/dyspraxia, psychomotor developmental delay, language delay, and attention deficit hyperactivity  
7 disorder outcomes (5 circles) and 25 treatments (25 radii). Each sector is coloured according to the surface under the cumulative ranking curve value of the  
8 corresponding treatment and outcome using the transformation of three colours red (0%), yellow (50%), and green (100%).  
9

10  
11  
12  
13  
14  
15  
16  
17  
18  
19  
20  
21  
22  
23  
24  
25  
26  
27  
28  
29  
30  
31  
32  
33  
34  
35  
36  
37  
38  
39  
40  
41  
42  
43  
44  
45  
46  
47  
48  
49

For peer review only

1  
2  
3  
4  
5  
6  
7  
8  
9  
10  
11  
12  
13  
14  
15  
16  
17  
18  
19  
20  
21  
22  
23  
24  
25  
26  
27  
28  
29  
30  
31  
32  
33  
34  
35  
36  
37  
38  
39  
40  
41  
42  
43  
44  
45  
46  
47  
48  
49

**Appendix J. Number of studies and treatments per outcome**

| Total studies                                                                                      | Range of study arms | # of treatments | # of patients | # of direct treatment comparisons | # of NMA treatment comparisons | Statistically significant NMA treatment effects | # of studies with zero events in all arms | # of studies with ineligible outcome definition* |
|----------------------------------------------------------------------------------------------------|---------------------|-----------------|---------------|-----------------------------------|--------------------------------|-------------------------------------------------|-------------------------------------------|--------------------------------------------------|
| <b>Cognitive Developmental Delay</b>                                                               |                     |                 |               |                                   |                                |                                                 |                                           |                                                  |
| 11                                                                                                 | (2,8)               | 18              | 933           | 62                                | 153                            | 5                                               | 1                                         | 5                                                |
| <b>Autism/Dyspraxia</b>                                                                            |                     |                 |               |                                   |                                |                                                 |                                           |                                                  |
| 5                                                                                                  | (4,6)               | 12              | 2551          | 34                                | 66                             | 8                                               | 0                                         | 4                                                |
| <b>Neonatal Seizure</b>                                                                            |                     |                 |               |                                   |                                |                                                 |                                           |                                                  |
| 1                                                                                                  | (2,2)               | 2               | 69            | 1                                 | 0                              | 0                                               | 1                                         | 1                                                |
| <b>Psychomotor Developmental Delay</b>                                                             |                     |                 |               |                                   |                                |                                                 |                                           |                                                  |
| 11                                                                                                 | (2,8)               | 18              | 1145          | 74                                | 153                            | 6                                               | 0                                         | 5                                                |
| <b>Language Delay</b>                                                                              |                     |                 |               |                                   |                                |                                                 |                                           |                                                  |
| 5                                                                                                  | (2,4)               | 5               | 509           | 7                                 | 10                             | 1                                               | 0                                         | 3                                                |
| <b>ADHD</b>                                                                                        |                     |                 |               |                                   |                                |                                                 |                                           |                                                  |
| 5                                                                                                  | (4,6)               | 7               | 816           | 20                                | 21                             | 0                                               | 0                                         | 0                                                |
| <b>Social Impairment</b>                                                                           |                     |                 |               |                                   |                                |                                                 |                                           |                                                  |
| 1                                                                                                  | (4,4)               | 4               | 422           | 1                                 | 0                              | 0                                               | 0                                         | 0                                                |
| <b>Abbreviations:</b> ADHD - Attention Deficit Hyperactivity Disorder; NMA - Network Meta-analysis |                     |                 |               |                                   |                                |                                                 |                                           |                                                  |

## Appendix K. Sensitivity and network meta-regression analyses - Anti-epileptic drugs compared with Control

| Treatment Comparison                                                                                                              | NMA Odds Ratio | 95% CrI                                          | 95% PrI                              |
|-----------------------------------------------------------------------------------------------------------------------------------|----------------|--------------------------------------------------|--------------------------------------|
| <b>Cognitive Developmental Delay – Sensitivity Analysis - Epilepsy only (10 studies, 910 patients, 17 treatments)</b>             |                |                                                  |                                      |
| Carbamazepine vs Control                                                                                                          | 2.08           | (0.79 - 5.82)                                    | (0.47 - 9.34)                        |
| Carbamazepine+Phenobarbital vs Control                                                                                            | 0.62           | (0.00 - 15.31)                                   | (0.00 - 19.29)                       |
| Carbamazepine+Phenobarbital+Phenytoin vs Control                                                                                  | 4.75           | (0.01 - 164.80)                                  | (0.01 - 192.50)                      |
| Carbamazepine+Phenobarbital+Valproate vs Control                                                                                  | 15.00          | (1.00 - 367.10)                                  | (0.82 - 426.90)                      |
| Carbamazepine+Phenytoin vs Control                                                                                                | 9.84           | (0.60 - 136.30)                                  | (0.49 - 164.50)                      |
| Ethosuximide+Phenytoin vs Control                                                                                                 | 6.53           | (0.02 - 216.00)                                  | (0.02 - 251.30)                      |
| Gabapentin vs Control                                                                                                             | 1.43           | (0.05 - 14.28)                                   | (0.04 - 18.20)                       |
| Lamotrigine vs Control                                                                                                            | 0.79           | (0.05 - 5.12)                                    | (0.05 - 6.66)                        |
| Levetiracetam vs Control                                                                                                          | 3.46           | (0.65 - 17.14)                                   | (0.47 - 23.57)                       |
| Phenobarbital vs Control                                                                                                          | 0.55           | (0.01 - 5.38)                                    | (0.01 - 6.85)                        |
| Phenobarbital+Phenytoin vs Control                                                                                                | 1.28           | (0.00 - 36.18)                                   | (0.00 - 44.03)                       |
| Phenytoin vs Control                                                                                                              | 2.47           | (0.65 - 8.25)                                    | (0.41 - 12.47)                       |
| Phenytoin+Valproate vs Control                                                                                                    | 3.68           | (0.01 - 121.00)                                  | (0.01 - 135.00)                      |
| Primidone vs Control                                                                                                              | 1.97           | (0.25 - 12.16)                                   | (0.19 - 16.25)                       |
| Topiramate vs Control                                                                                                             | 3.06           | (0.42 - 17.51)                                   | (0.32 - 23.57)                       |
| Valproate vs Control                                                                                                              | 7.48           | (2.99 - 19.04)                                   | (1.67 - 31.21)                       |
| <i>Common within-network between-study variance</i>                                                                               | 0.16           | (0.00 - 1.36)                                    |                                      |
| <i>Evaluation of inconsistency using the design-by-treatment interaction model</i>                                                |                | Chi-square test: 12.98<br>Degrees of Freedom: 14 | P-value: 0.53<br>Heterogeneity: 0.00 |
| <b>Cognitive Developmental Delay - Sensitivity Analysis - First generation AEDs only (6 studies, 480 patients, 13 treatments)</b> |                |                                                  |                                      |
| Carbamazepine vs Control                                                                                                          | 1.68           | (0.37 - 7.82)                                    | (0.19 - 14.98)                       |
| Carbamazepine+Phenytoin vs Control                                                                                                | 8.98           | (0.36 - 169.90)                                  | (0.26 - 243.60)                      |
| Carbamazepine+Phenobarbital vs Control                                                                                            | 0.46           | (0.00 - 21.02)                                   | (0.00 - 28.01)                       |
| Carbamazepine+Phenobarbital+Phenytoin vs Control                                                                                  | 4.12           | (0.01 - 180.10)                                  | (0.00 - 236.30)                      |
| Carbamazepine+Phenobarbital+Valproate vs Control                                                                                  | 12.84          | (0.50 - 435.70)                                  | (0.35 - 604.30)                      |
| Ethosuximide+Phenytoin vs Control                                                                                                 | 5.65           | (0.01 - 219.00)                                  | (0.01 - 291.50)                      |

| Treatment Comparison                                                                                                                             | NMA Odds Ratio | 95% CrI                                        | 95% PrI                              |
|--------------------------------------------------------------------------------------------------------------------------------------------------|----------------|------------------------------------------------|--------------------------------------|
| Phenobarbital vs Control                                                                                                                         | 0.64           | (0.00 - 26.02)                                 | (0.00 - 35.36)                       |
| Phenobarbital+Phenytoin vs Control                                                                                                               | 1.06           | (0.00 - 37.64)                                 | (0.00 - 50.85)                       |
| Phenytoin vs Control                                                                                                                             | 2.08           | (0.26 - 12.50)                                 | (0.13 - 22.02)                       |
| Phenytoin+Valproate vs Control                                                                                                                   | 3.14           | (0.00 - 135.80)                                | (0.00 - 178.90)                      |
| Primidone vs Control                                                                                                                             | 3.30           | (0.18 - 43.76)                                 | (0.12 - 68.72)                       |
| Valproate vs Control                                                                                                                             | 13.22          | (3.20 - 64.06)                                 | (1.50 - 128.40)                      |
| <i>Common within-network between-study variance</i>                                                                                              | 0.27           | (0.00 - 2.97)                                  |                                      |
| <i>Evaluation of inconsistency using the design-by-treatment interaction model</i>                                                               |                | Chi-square test: 3.31<br>Degrees of Freedom: 3 | P-value: 0.35<br>Heterogeneity: 0.00 |
| <b>Cognitive Developmental Delay - Sensitivity Analysis - Maternal Alcohol or Tobacco use (3 studies, 504 patients, 7 treatments)</b>            |                |                                                |                                      |
| Carbamazepine vs Control                                                                                                                         | 1.97           | (0.40 - 10.01)                                 | (0.19 - 21.27)                       |
| Gabapentin vs Control                                                                                                                            | 1.47           | (0.04 - 19.01)                                 | (0.02 - 27.11)                       |
| Lamotrigine vs Control                                                                                                                           | 0.41           | (0.00 - 10.09)                                 | (0.00 - 13.61)                       |
| Levetiracetam vs Control                                                                                                                         | 3.55           | (0.43 - 24.13)                                 | (0.23 - 42.39)                       |
| Topiramate vs Control                                                                                                                            | 3.17           | (0.30 - 24.07)                                 | (0.18 - 44.87)                       |
| Valproate vs Control                                                                                                                             | 7.79           | (1.84 - 29.60)                                 | (0.84 - 62.77)                       |
| <i>Common within-network between-study variance</i>                                                                                              | 0.27           | (0.00 - 3.29)                                  |                                      |
| <i>Evaluation of inconsistency using the design-by-treatment interaction model</i>                                                               |                | Chi-square test: 2.69<br>Degrees of Freedom: 2 | P-value: 0.26<br>Heterogeneity: NA   |
| <b>Cognitive Developmental Delay - Sensitivity Analysis - Low Risk of Bias: "Adequacy of follow-up" (4 studies, 283 patients, 12 treatments)</b> |                |                                                |                                      |
| Carbamazepine vs Control                                                                                                                         | 2.68           | (0.05 - 2.9 x 10 <sup>3</sup> )                | (0.03 - 4.3 x 10 <sup>3</sup> )      |
| Carbamazepine+Phenobarbital vs Control                                                                                                           | 0.67           | (0.00 - 2.2 x 10 <sup>3</sup> )                | (0.00 - 2.9 x 10 <sup>3</sup> )      |
| Carbamazepine+Phenobarbital+Phenytoin vs Control                                                                                                 | 5.23           | (0.01 - 7.2 x 10 <sup>3</sup> )                | (0.00 - 1.1 x 10 <sup>4</sup> )      |
| Carbamazepine+Phenobarbital+Valproate vs Control                                                                                                 | 22.18          | (0.10 - 4.8 x 10 <sup>4</sup> )                | (0.06 - 7.7 x 10 <sup>4</sup> )      |
| Carbamazepine+Phenytoin vs Control                                                                                                               | 11.45          | (0.13 - 1.2 x 10 <sup>4</sup> )                | (0.07 - 1.8 x 10 <sup>4</sup> )      |
| Ethosuximide+Phenytoin vs Control                                                                                                                | 6.45           | (0.01 - 8.3 x 10 <sup>3</sup> )                | (0.00 - 1.4 x 10 <sup>4</sup> )      |
| Lamotrigine vs Control                                                                                                                           | 0.52           | (0.00 - 1.2 x 10 <sup>3</sup> )                | (0.00 - 1.9 x 10 <sup>3</sup> )      |
| Phenobarbital+Phenytoin vs Control                                                                                                               | 1.33           | (0.00 - 1.8 x 10 <sup>3</sup> )                | (0.00 - 2.7 x 10 <sup>3</sup> )      |
| Phenytoin vs Control                                                                                                                             | 1.67           | (0.03 - 1.8 x 10 <sup>3</sup> )                | (0.01 - 2.5 x 10 <sup>3</sup> )      |



| Treatment Comparison                                                                                                                                  | NMA Odds Ratio | 95% CrI                                        | 95% PrI                              |
|-------------------------------------------------------------------------------------------------------------------------------------------------------|----------------|------------------------------------------------|--------------------------------------|
| Phenytoin+Valproate vs Control                                                                                                                        | 3.94           | (0.00 - 6.7 x 10 <sup>3</sup> )                | (0.00 - 8.8 x10 <sup>3</sup> )       |
| Valproate vs Control                                                                                                                                  | 5.9            | (0.06 - 9.7 x 10 <sup>3</sup> )                | (0.03 - 1.5 x 10 <sup>4</sup> )      |
| <i>Common within-network between-study variance</i>                                                                                                   | 1.01           | (0.01 - 5.85)                                  |                                      |
| <i>Evaluation of inconsistency using the design-by-treatment interaction model</i>                                                                    |                | Chi-square test: 5.07<br>Degrees of Freedom: 2 | P-value: 0.08<br>Heterogeneity: 0.00 |
| <b>Cognitive Developmental Delay - Sensitivity Analysis - Low Risk of Bias: "Comparability of cohorts"</b><br>(3 studies, 366 patients, 7 treatments) |                |                                                |                                      |
| Carbamazepine vs Control                                                                                                                              | 1.46           | (0.11 - 19.59)                                 | (0.06 - 38.10)                       |
| Gabapentin vs Control                                                                                                                                 | 1.19           | (0.03 - 22.80)                                 | (0.02 - 39.35)                       |
| Lamotrigine vs Control                                                                                                                                | 0.27           | (0.00 - 11.80)                                 | (0.00 - 19.37)                       |
| Levetiracetam vs Control                                                                                                                              | 2.90           | (0.30 - 32.81)                                 | (0.15 - 62.97)                       |
| Topiramate vs Control                                                                                                                                 | 2.55           | (0.22 - 29.21)                                 | (0.11 - 64.23)                       |
| Valproate vs Control                                                                                                                                  | 5.79           | (1.05 - 47.35)                                 | (0.47 - 102.90)                      |
| <i>Common within-network between-study variance</i>                                                                                                   | 0.38           | (0.00 - 4.14)                                  |                                      |
| <i>Evaluation of inconsistency using the design-by-treatment interaction model</i>                                                                    |                | Chi-square test: 1.47<br>Degrees of Freedom: 2 | P-value: 0.48<br>Heterogeneity: NA   |
| <b>Cognitive Developmental Delay – Network Meta-regression Analysis</b><br>(11 studies, 933 patients, 18 treatments)                                  |                |                                                |                                      |
| Carbamazepine vs Control                                                                                                                              | 1.99           | (0.64 - 6.18)                                  | (0.40 - 9.77)                        |
| Carbamazepine+Levetiracetam vs Control                                                                                                                | 0.54           | (0.00 - 16.36)                                 | (0.00 - 19.87)                       |
| Carbamazepine+Phenobarbital vs Control                                                                                                                | 0.50           | (0.00 - 16.10)                                 | (0.00 - 19.36)                       |
| Carbamazepine+Phenobarbital+Phenytoin vs Control                                                                                                      | 4.36           | (0.01 - 171.20)                                | (0.01 - 194.60)                      |
| Carbamazepine+Phenobarbital+Valproate vs Control                                                                                                      | 14.58          | (0.90 - 413.20)                                | (0.74 - 488.90)                      |
| Carbamazepine+Phenytoin vs Control                                                                                                                    | 9.44           | (0.50 - 130.50)                                | (0.39 - 162.40)                      |
| Ethosuximide+Phenytoin vs Control                                                                                                                     | 5.77           | (0.01 - 234.70)                                | (0.01 - 268.10)                      |
| Gabapentin vs Control                                                                                                                                 | 1.37           | (0.04 - 15.51)                                 | (0.03 - 19.10)                       |
| Lamotrigine vs Control                                                                                                                                | 0.87           | (0.07 - 5.14)                                  | (0.06 - 6.76)                        |
| Levetiracetam vs Control                                                                                                                              | 3.43           | (0.57 - 18.78)                                 | (0.42 - 24.85)                       |
| Phenobarbital vs Control                                                                                                                              | 1.16           | (0.13 - 8.59)                                  | (0.10 - 11.43)                       |
| Phenobarbital+Phenytoin vs Control                                                                                                                    | 1.34           | (0.00 - 39.21)                                 | (0.00 - 49.39)                       |

| Treatment Comparison                                                                                                         | NMA Odds Ratio | 95% CrI                                          | 95% PrI                              |
|------------------------------------------------------------------------------------------------------------------------------|----------------|--------------------------------------------------|--------------------------------------|
| Phenytoin vs Control                                                                                                         | 2.43           | (0.55 - 9.14)                                    | (0.36 - 13.45)                       |
| Phenytoin+Valproate vs Control                                                                                               | 3.58           | (0.01 - 134.20)                                  | (0.01 - 161.70)                      |
| Primidone vs Control                                                                                                         | 2.03           | (0.21 - 16.49)                                   | (0.16 - 21.39)                       |
| Topiramate vs Control                                                                                                        | 2.93           | (0.41 - 16.34)                                   | (0.31 - 22.91)                       |
| Valproate vs Control                                                                                                         | 7.03           | (2.26 - 20.02)                                   | (1.41 - 30.92)                       |
| <i>Common within-network between-study variance</i>                                                                          | 0.16           | (0.00 - 1.27)                                    |                                      |
| <i>Regression Coefficient</i>                                                                                                | 1.01           | (0.76 - 1.56)                                    |                                      |
| <i>Evaluation of inconsistency using the design-by-treatment interaction model</i>                                           |                | Chi-square test: 14.15<br>Degrees of Freedom: 17 | P-value: 0.66<br>Heterogeneity: 0.00 |
| <b>Autism/Dyspraxia - Sensitivity Analysis - Large cohort (&gt;300 patients) - (1 study, 2,551 patients, 5 treatments)**</b> |                |                                                  |                                      |
| Clonazepam vs Carbamazepine                                                                                                  | 1.08           | (0.24 - 4.85)                                    | -                                    |
| Lamotrigine vs Carbamazepine                                                                                                 | 1.20           | (0.36 - 4.00)                                    | -                                    |
| Oxcarbazepine vs Carbamazepine                                                                                               | 2.13           | (0.62 - 7.35)                                    | -                                    |
| Valproate vs Carbamazepine                                                                                                   | 3.05           | (0.97 - 9.52)                                    | -                                    |
| <i>Common within-network between-study variance</i>                                                                          | NA             | NA                                               |                                      |
| <i>Evaluation of inconsistency using the design-by-treatment interaction model</i>                                           |                | NA                                               | NA                                   |
| <b>Autism/Dyspraxia - Sensitivity Analysis - Epilepsy only (4 studies, 540 patients, 10 treatments)</b>                      |                |                                                  |                                      |
| Carbamazepine vs Control                                                                                                     | 5.20           | (0.54 - 90.53)                                   | (0.33 - 133.00)                      |
| Carbamazepine+Clonazepam vs Control                                                                                          | 7.90           | (0.01 - 653.30)                                  | (0.01 - 881.00)                      |
| Carbamazepine+Lamotrigine vs Control                                                                                         | 4.25           | (0.01 - 333.60)                                  | (0.01 - 446.90)                      |
| Carbamazepine+Phenytoin vs Control                                                                                           | 9.03           | (0.01 - 666.30)                                  | (0.01 - 893.00)                      |
| Lamotrigine vs Control                                                                                                       | 10.24          | (1.25 - 171.40)                                  | (0.67 - 248.50)                      |
| Lamotrigine+Valproate vs Control                                                                                             | 120.20         | (5.25 - 4.5 x 10 <sup>3</sup> )                  | (3.51 - 6.0 x 10 <sup>3</sup> )      |
| Levetiracetam vs Control                                                                                                     | 3.52           | (0.00 - 272.20)                                  | (0.00 - 364.30)                      |
| Phenytoin vs Control                                                                                                         | 8.10           | (0.01 - 577.50)                                  | (0.01 - 754.60)                      |
| Valproate vs Control                                                                                                         | 14.41          | (1.66 - 252.10)                                  | (0.88 - 378.00)                      |
| <i>Common within-network between-study variance</i>                                                                          | 0.31           | (0.00 - 3.04)                                    |                                      |
| <i>Evaluation of inconsistency using the design-by-treatment interaction model</i>                                           |                | Chi-square test: 2.9<br>Degrees of Freedom: 3    | P-value: 0.41<br>Heterogeneity: 0.00 |

| Treatment Comparison                                                                                                                  | NMA Odds Ratio              | 95% CrI                                                 | 95% PrI                              |
|---------------------------------------------------------------------------------------------------------------------------------------|-----------------------------|---------------------------------------------------------|--------------------------------------|
| <b>Autism/Dyspraxia - Sensitivity Analysis - Maternal Tobacco Use (4 studies, 540 patients, 10 treatments)</b>                        |                             |                                                         |                                      |
| Carbamazepine vs Control                                                                                                              | 2.51                        | (0.05 - 154.30)                                         | (0.04 - 254.50)                      |
| Lamotrigine vs Control                                                                                                                | 24.84                       | (2.14 - 1.2 x 10 <sup>3</sup> )                         | (1.23 - 2.2 x 10 <sup>3</sup> )      |
| Valproate vs Control                                                                                                                  | 33.40                       | (2.60 - 1.7 x 10 <sup>3</sup> )                         | (1.45 - 2.9 x 10 <sup>3</sup> )      |
| <i>Common within-network between-study variance</i>                                                                                   | 0.39                        | (0.00 - 4.47)                                           |                                      |
| <i>Evaluation of inconsistency using the design-by-treatment interaction model</i>                                                    |                             | NA - all closed loops are formed from a multi-arm study |                                      |
| <b>Autism/Dyspraxia - Sensitivity Analysis - Maternal Alcohol Use (1 study, 156 patients, 4 treatments)</b>                           |                             |                                                         |                                      |
| Carbamazepine vs Control                                                                                                              | Excluded due to zero events | -                                                       | -                                    |
| Lamotrigine vs Control                                                                                                                | 4.65                        | (0.21 - 100.00)                                         | -                                    |
| Valproate vs Control                                                                                                                  | 7.75                        | (0.42 - 142.86)                                         | -                                    |
| <i>Common within-network between-study variance</i>                                                                                   | 1.91                        | (0.36 - 10.13)                                          |                                      |
| <i>Evaluation of inconsistency using the design-by-treatment interaction model</i>                                                    |                             | NA                                                      | NA                                   |
| <b>Autism/Dyspraxia - Sensitivity Analysis - Low Risk of Bias: "Adequacy of Follow-up" (3 studies, 2,244 patients, 10 treatments)</b> |                             |                                                         |                                      |
| Carbamazepine vs Control                                                                                                              | 3.97                        | (0.17 - 2.4 x 10 <sup>3</sup> )                         | (0.11 - 3.0 x 10 <sup>3</sup> )      |
| Carbamazepine+Clonazepam vs Control                                                                                                   | 7.48                        | (0.01 - 7.8 x 10 <sup>3</sup> )                         | (0.01 - 9.0 x 10 <sup>3</sup> )      |
| Carbamazepine+Lamotrigine vs Control                                                                                                  | 4.47                        | (0.00 - 5.0 x 10 <sup>3</sup> )                         | (0.00 - 5.7 x 10 <sup>3</sup> )      |
| Carbamazepine+Phenytoin vs Control                                                                                                    | 7.23                        | (0.01 - 6.6 x 10 <sup>3</sup> )                         | (0.01 - 8.2 x 10 <sup>3</sup> )      |
| Clonazepam vs Control                                                                                                                 | 4.88                        | (0.12 - 3.2 x 10 <sup>3</sup> )                         | (0.09 - 3.8 x 10 <sup>3</sup> )      |
| Lamotrigine vs Control                                                                                                                | 6.55                        | (0.30 - 4.4 x 10 <sup>3</sup> )                         | (0.21 - 4.7 x 10 <sup>3</sup> )      |
| Lamotrigine+Valproate vs Control                                                                                                      | 113.50                      | (2.33 - 7.8 x 10 <sup>4</sup> )                         | (1.62 - 8.9 x 10 <sup>4</sup> )      |
| Oxcarbazepine vs Control                                                                                                              | 10.23                       | (0.36 - 6.8 x 10 <sup>3</sup> )                         | (0.26 - 7.5 x 10 <sup>3</sup> )      |
| Valproate vs Control                                                                                                                  | 13.97                       | (0.68 - 8.4 x 10 <sup>3</sup> )                         | (0.47 - 1.0 x 10 <sup>4</sup> )      |
| <i>Common within-network between-study variance</i>                                                                                   | 0.23                        | (0.00 - 2.88)                                           |                                      |
| <i>Evaluation of inconsistency using the design-by-treatment interaction model</i>                                                    |                             | Chi-square test: 2.17<br>Degrees of Freedom: 3          | P-value: 0.54<br>Heterogeneity: 0.00 |

| Treatment Comparison                                                                                | NMA Odds Ratio | 95% CrI                                        | 95% PrI                              |
|-----------------------------------------------------------------------------------------------------|----------------|------------------------------------------------|--------------------------------------|
| <b>Autism/Dyspraxia - Sensitivity Analysis - Low Risk of Bias: "Comparability of Cohorts"</b>       |                |                                                |                                      |
| <b>(4 studies, 2,395 patients, 12 treatments)</b>                                                   |                |                                                |                                      |
| Carbamazepine vs Control                                                                            | 9.55           | (0.90 - 246.20)                                | (0.61 - 329.40)                      |
| Carbamazepine+Clonazepam vs Control                                                                 | 13.58          | (0.01 - 1.3 x 10 <sup>3</sup> )                | (0.01 - 1.6 x 10 <sup>3</sup> )      |
| Carbamazepine+Lamotrigine vs Control                                                                | 7.11           | (0.01 - 614.20)                                | (0.01 - 717.60)                      |
| Carbamazepine+Phenytoin vs Control                                                                  | 10.97          | (0.01 - 1.1 x 10 <sup>3</sup> )                | (0.01 - 1.4 x 10 <sup>3</sup> )      |
| Clonazepam vs Control                                                                               | 8.33           | (0.45 - 263.10)                                | (0.33 - 353.70)                      |
| Lamotrigine vs Control                                                                              | 10.98          | (1.07 - 283.50)                                | (0.71 - 358.20)                      |
| Lamotrigine+Valproate vs Control                                                                    | 194.10         | (8.06 - 8.4 x 10 <sup>3</sup> )                | (6.28 - 1.0 x 10 <sup>4</sup> )      |
| Levetiracetam vs Control                                                                            | 4.25           | (0.00 - 390.90)                                | (0.00 - 485.30)                      |
| Oxcarbazepine vs Control                                                                            | 17.60          | (1.22 - 552.20)                                | (0.86 - 727.40)                      |
| Phenytoin vs Control                                                                                | 9.76           | (0.01 - 861.60)                                | (0.01 - 1.0 x 10 <sup>3</sup> )      |
| Valproate vs Control                                                                                | 21.06          | (1.86 - 525.40)                                | (1.25 - 681.90)                      |
| <i>Common within-network between-study variance</i>                                                 | 0.19           | (0.00 - 2.43)                                  |                                      |
| <i>Evaluation of inconsistency using the design-by-treatment interaction model</i>                  |                | Chi-square test: 3.36<br>Degrees of Freedom: 5 | P-value: 0.64<br>Heterogeneity: 0.00 |
| <b>Autism/Dyspraxia - Sensitivity Analysis - Maternal IQ (1 study, 77 patients, 6 treatments)**</b> |                |                                                |                                      |
| Carbamazepine+Clonazepam vs Carbamazepine                                                           | 1.86           | (0.07 - 47.62)                                 | -                                    |
| Carbamazepine+Lamotrigine vs Carbamazepine                                                          | 1.18           | (0.05 - 27.78)                                 | -                                    |
| Carbamazepine+Phenytoin vs Carbamazepine                                                            | 1.86           | (0.07 - 47.62)                                 | -                                    |
| Lamotrigine+Valproate vs Carbamazepine                                                              | 15.87          | (1.87 - 142.86)                                | -                                    |
| Valproate vs Carbamazepine                                                                          | 1.33           | (0.18 - 10.20)                                 | -                                    |
| <i>Common within-network between-study variance</i>                                                 | NA             | NA                                             |                                      |
| <i>Evaluation of inconsistency using the design-by-treatment interaction model</i>                  |                | NA                                             | NA                                   |

Abbreviations: NMA – Network Meta-analysis; OR – odds ratio; CrI – Credible Interval; PrI – Predictive Interval

\*\* Network did not include a control arm, comparison with Carbamazepine is reported instead
